# Supplementary material for: Metabolic model-based ecological modeling for probiotic design
Source: eLife. 2024 Feb 21;13:e83690. doi: 10.7554/eLife.83690 (PMC10942782; doi:10.7554/eLife.83690)
Supplement: Supplementary file 1. — (Relative_Abundance_Table) Relative abundance of each taxa in each sample in the data-set, product of Bracken analysis on original data. (RefSeq_Genomes_Used) Genomes matched to taxa in data from RefSeq database, used to create models. (Taxa_Names) Names of taxa in the data, matched with Taxa ID. (Baseline_Sample_Coverage) Coverage (as proportion of relative abundance) of models used in analysis of Baseline time point samples (i.e. taxa for which we could identify a high quality close match genome). (Treatment_Sample_Coverage) Coverage (as proportion of relative abundance) of models used in analysis of Treatment time point samples (i.e. taxa for which we could identify a high quality close match genome). (EU_Average_Diet) Main media file used, from vmh.life. (Probiotic_Cell_Counts) Cell counts of B. longum probiotic, provided by Maldonado-Gomez et al. (Paramater_Sensitivity) Summary of parameter sensitivity results (average and variance across samples). (Baseline_Sample_Sensitivity) Parameter sensitivity in baseline time-point samples (2 strongest positive and 2 strongest negative edges, 2 strongest positive and 2 strongest negative edges with B. longum as target). (Treatment_Sample_Sensitivity) Parameter sensitivity in treatment time-point samples (2 strongest positive and 2 strongest negative edges, 2 strongest positive and 2 strongest negative edges with B. longum as target). [file elife-83690-supp1.xlsx]

## Sheet: Supplemental_File_Key
Sheet Name	Description
Relative_Abundance_Table	Relative abundance of each taxa in each sample, product of Bracken analysis on orginal data
RefSeq_Genomes_Used	Genomes matched to taxa in data from RefSeq database, used to create models
Taxa_Names	Names of taxa in data
Baseline_Sample_Coverage	Coverage (as proportion of relative abundance) of models used in analysis of Baseline timpoint samples (i.e. taxa for which we could identify a high quality close match genome)
Treatment_Sample_Coverage	Coverage (as proportion of relative abundance) of models used in analysis of Treatment timpoint samples (i.e. taxa for which we could identify a high quality close match genome)
EU_Average_Diet	Main media file used, from vmh.life
Probiotic_Cell_Counts	Cell counts of B. longum probiotic, provided by Maldonado-Gomez et al.
Paramater_Sensitivity	Summary of parameter sensitivity results (average and variance across samples)
Baseline_Sample_Sensitivity	Parameter sensitivity in baseline timepoint samples (2 strongest positive and 2 strongest negative edges, 2 strongest positive and 2 strongest negative edges with B. longum as target)
Treatment_Sample_Sensitivity	Parameter sensitivity in treatment timepoint samples (2 strongest positive and 2 strongest negative edges, 2 strongest positive and 2 strongest negative edges with B. longum as target)

## Sheet: Relative_Abundance_Table
	Name	SRR3917608	SRR3736988	SRR3736989	SRR3917587	SRR3917627	SRR3917619	SRR3736999	SRR3736998	SRR3737029	SRR3737001	SRR3737015	SRR3917694	SRR3730381	SRR3730395	SRR3730356	SRR3730357	SRR3730394	SRR3730380	SRR3917695	SRR3737014	SRR3737000	SRR3737028	SRR3737016	SRR3737002	SRR3917697	SRR3730396	SRR3730382	SRR3730355	SRR3730369	SRR3730368	SRR3730354	SRR3730383	SRR3730397	SRR3917696	SRR3737003	SRR3737017	SRR3737013	SRR3737007	SRR3917686	SRR3917692	SRR3730393	SRR3730387	SRR3730378	SRR3730350	SRR3730345	SRR3730351	SRR3730379	SRR3730386
33039	[Ruminococcus] torques	0.03084	0.00596	0.02354	0.02094	0.00839	0.04782	0.00789	0.03571	0.04142	0.0406	0.04351	0.00488	0.00588	0.00896	0.01268	0.00506	0.00816	0.00278	0.0031	0.01443	0.00263	0.00755	0	0.00616	0.03019	0.00501	0.00129	0.00473	0.00858	0.00611	0.00135	0.00471	0.00838	0.00071	0.00164	0.00681	0.00924	0.02025	0.00362	0.00139	0.00728	0.01027	0.00234	0.007	0.00174	0.00197	0.00304	0.01144
765821	uncultured Blautia sp.	0.01005	0.0108	0.01364	0.00384	0.00986	0.03734	0.00969	0.01345	0.02181	0.01441	0.04665	0.011	0.00447	0.00518	0.01095	0.00363	0.01183	0.00999	0.007	0.02244	0.03086	0.01013	0	0.04338	0.01802	0.00868	0.01195	0.00557	0.01045	0.00952	0.00265	0.00691	0.02102	0.00861	0.02872	0.00647	0.00344	0.00577	0.00148	0.00616	0.00629	0.01579	0.00625	0.01229	0.02434	0.00873	0.02116	0.02219
1262755	Blautia sp. CAG:237	0.008	0.0005	7e-05	0.00032	0.00023	0.00017	0.00018	0.00018	0.0001	6e-05	0.00036	0.00011	0	0	0	0	0	0	5e-05	0.0014	0.00029	0.00012	0	0.001	0.00034	0	0	0	0	0	0	0	0	8e-05	0.00095	6e-05	0.00038	5e-05	2e-05	2e-05	0	0	0	0	0	0	0	0
1262756	Blautia sp. CAG:257	8e-05	7e-05	4e-05	5e-05	5e-05	7e-05	3e-05	0.0004	7e-05	2e-05	7e-05	3e-05	0	0	0	0	0	0	2e-05	0.00014	0.00025	2e-05	0	7e-05	7e-05	0	0	0	0	0	0	0	0	0.00024	9e-05	4e-05	4e-05	3e-05	0.00044	3e-05	0	0	0	0	0	0	0	0
1737424	Blautia massiliensis	0.01631	0.01921	0.00853	0.00216	0.0142	0.03381	0.00995	0.00331	0.03098	0.01065	0.03116	0.00949	0.04751	0.00293	0.03199	0.00602	0.02603	0.00358	0.01912	0.02134	0.07707	0.01526	0	0.01096	0.00082	0.0069	0.06949	0.00709	0.03728	0.01391	0.01135	0.00171	0.04872	0.04131	0.04498	0.0013	0.00142	0.00754	0.00797	0.00353	0.01852	0.02771	0.01395	0.01085	0.00021	0.00322	0.00625	0.03843
1805476	Blautia sp. Marseille-P2398	0.01088	0.0069	0.00132	0.00059	0.00194	0.00398	0.00177	0.01192	0.00257	0.00138	0.00538	0.00128	9e-05	0.00095	0.00017	0.00019	0.00852	0.00027	0.00078	0.017	0.00626	0.00092	0	0.00184	0.00913	0.0003	0.00184	0.00098	0.00646	0	0.00198	0	0	0.00208	0.00477	0.00063	0.00044	0.00233	0.00027	0.0004	0.00459	0.0001	0.00011	0.00037	0.00015	0.0004	0.00272	0
40520	Blautia obeum	0.00539	0.01348	0.00068	0.00046	0.00141	0.00185	0.00128	0.00059	0.00396	0.0021	0.00312	0.00399	0.00979	0.00552	0.00484	0.01142	0.02466	0.01278	0.00198	0.02628	0.01174	0.00464	0	0.00909	0.00224	0.01338	0.02444	0.00682	0.01175	0.0079	0.00268	0.00726	0.01397	0.00386	0.00743	0.00025	0.00028	0.00187	0.0001	0.00034	0.01056	0.01363	0.01011	0.00703	0.0018	0.01772	0.00811	0.03083
1917876	Blautia sp. Marseille-P3087	0.00163	0.00137	0.00053	0.00025	0.0005	0.00101	0.00092	0.00131	0.00037	0.00037	0.00157	0.0004	0	0	0	0	0	0	0.00019	0.00265	0.00072	0.00035	0	0.00561	0.00089	0	0	0	0	0	0	0	0	0.00033	0.00095	0.00016	0.00019	0.00024	3e-05	9e-05	0	0	0	0	0	0	0	0
33038	[Ruminococcus] gnavus	0.00151	0.00113	0.00099	0.00029	0.0007	0.00107	0.00033	0.01349	0.00211	0.00232	0.00095	0.00046	0.00095	0.01709	0.00129	0	6e-05	5e-05	0.00025	0.0012	0.01372	0.00075	0	0.00131	0.00213	0	0.01001	9e-05	0	0	0	0	0.0006	0.01133	0.0013	0.01347	0.00022	0.00053	0.00053	0.00017	0.00011	0	0.00012	0.00036	0	0.00052	0	0.00018
1907659	Blautia sp. Marseille-P3201T	0.00037	0.00034	0.0001	5e-05	0.00016	0.00012	3e-05	0.00013	9e-05	7e-05	0.00012	4e-05	0.00173	0	0.00159	0	0.0003	0	2e-05	0.00053	0.00015	3e-05	0	7e-05	0.0002	0.00066	0	0	0	0.00031	0	0	0.00016	0.00011	7e-05	0.00017	4e-05	4e-05	0.00025	1e-05	0	0	0.00021	2e-05	4e-05	0	0.00011	3e-05
1946118	Blautia sp. UBA2945	0.00012	0.00019	0.00016	7e-05	0.0001	0.00014	0.00012	0.00015	9e-05	0.0003	0.00016	0.00158	0	0	0	0	0	0	5e-05	0.0003	0.00012	0.00027	0	0.0001	0.00016	0	0	0	0	0	0	0	0	8e-05	7e-05	5e-05	6e-05	5e-05	2e-05	4e-05	0	0	0	0	0	0	0	0
180164	Blautia schinkii	0.00012	0.00014	6e-05	7e-05	8e-05	8e-05	8e-05	0.00012	0.00011	0.00019	9e-05	8e-05	0	0	0	0	0	0	7e-05	0.00015	0.00019	9e-05	0	0.00013	0.00017	0	0	0	0	0	0	0	0	5e-05	0.00024	0.0001	7e-05	4e-05	0.00019	5e-05	0	0	0	0	0	0	0	0
1322	Blautia hansenii	0.00025	0.0002	8e-05	0.00015	0.00051	0.0001	0.00011	0.00016	0.00034	0.00015	9e-05	7e-05	0	0	7e-05	0	0	0	0.00013	0.00026	0.0025	7e-05	0	0.00256	0.00011	6e-05	0	0	0.00018	0.00098	0.00012	0	0	9e-05	0.00023	9e-05	0.00016	0.0001	0.00012	6e-05	0	0.00058	0.00023	0	9e-05	0	0.0003	0
33035	Blautia producta	0.0001	0.0001	9e-05	0.0001	0.0001	9e-05	7e-05	0.00036	0.00017	9e-05	0.00011	9e-05	0	0	0	0	0	0	5e-05	0.00013	0.00015	7e-05	0	0.00013	0.00037	0	0	0	0	0	0	0	0	0.00043	0.00012	0.00024	0.00012	6e-05	0.00058	5e-05	0	0	1e-05	0	0	0	0	0
1965659	Blautia sp. An81	9e-05	0.0001	0.00016	0.00011	9e-05	0.0002	7e-05	0.00015	0.00014	7e-05	0.0002	4e-05	0	0	0	0	0	0	5e-05	0.00013	0.00029	6e-05	0	0.00014	0.00051	0	0	0	0	0	0	0	0	7e-05	0.00012	8e-05	0.00011	5e-05	0.00025	5e-05	0	0	0	0	0	0	0	0
1965603	Blautia sp. An249	6e-05	9e-05	7e-05	0.00012	7e-05	9e-05	5e-05	8e-05	0.00013	0.00011	0.00011	4e-05	0	0	0.00048	0	8e-05	0	9e-05	0.0001	0.00022	7e-05	0	5e-05	0.00015	0.00059	0.00072	0	0	0.00013	0	0	0.0006	7e-05	0.00016	0.00011	0.00011	5e-05	0.00014	4e-05	0	0.00054	0.0002	0.00017	0.00037	0.00062	0.00067	0
53443	Blautia hydrogenotrophica	6e-05	5e-05	5e-05	5e-05	5e-05	6e-05	0.0002	9e-05	5e-05	2e-05	0.0001	5e-05	4e-05	9e-05	6e-05	5e-05	4e-05	0.0001	3e-05	6e-05	0.00011	5e-05	0	6e-05	0.00014	7e-05	0	3e-05	0.0002	0.00022	2e-05	0.00013	0.00014	4e-05	7e-05	0.00012	6e-05	3e-05	9e-05	3e-05	0.0002	0.00026	1e-05	5e-05	5e-05	4e-05	0.00019	0.00041
1796616	Blautia sp. YL58	5e-05	6e-05	2e-05	3e-05	3e-05	4e-05	2e-05	7e-05	0.0001	5e-05	4e-05	5e-05	0.00055	0.00014	0.00034	0.00041	0.00034	0.00011	3e-05	7e-05	7e-05	4e-05	0	7e-05	6e-05	7e-05	0.00091	3e-05	0.00049	0.00046	0.00114	0.00016	0.00068	5e-05	5e-05	6e-05	3e-05	4e-05	7e-05	3e-05	0.00014	0.00031	0.00014	0.00024	6e-05	0.00017	0.00028	0.0002
2025493	Blautia hominis	2e-05	2e-05	1e-05	2e-05	2e-05	2e-05	1e-05	2e-05	2e-05	1e-05	3e-05	1e-05	0	0	0	0	0	0	0	2e-05	2e-05	1e-05	0	1e-05	1e-05	0	0	0	0	0	0	0	0	1e-05	1e-05	1e-05	2e-05	1e-05	1e-05	1e-05	0	0	0	0	0	0	0	0
88431	Dorea longicatena	0.05506	0.05637	0.02684	0.01818	0.06678	0.02403	0.01168	0.00184	0.00865	0.01156	0.02497	0.00501	0.00829	0.00043	0	0.00786	0.00093	0.00781	0.00078	0.04719	0.00373	0.00352	0.02613	0.00477	0.011	0	0.00732	0	0.00043	0.00656	0	0.01044	0.01953	0.01185	0.00287	0.00702	0.01729	0.00838	0.0004	0.00036	0	0.01542	0.0078	0.0062	0	0.00771	0.00632	0
39486	Dorea formicigenerans	0.01295	0.01426	0.00437	0.00193	0.00176	0.00574	0.00501	0.00793	0.00405	0.00332	0.004	0.0017	0	0.01738	0	0	0.01259	0	0.00077	0.00862	0.00021	0.00224	0	0.00534	0.00241	0.016	0	0	0	0	0	0	0	0.00047	0.00052	0.00039	0.0015	0.00168	0.00011	0.00034	0	0	0	0	0	0	0	0
286138	uncultured Dorea sp.	0.01229	0.01339	0.00282	0.00153	0.00123	0.00381	0.00345	0.00672	0.00254	0.00188	0.00269	0.00128	0	0	0.0201	0	0	0	0.00032	0.00791	0.00013	0.00142	0	0.00291	0.00161	0	0	0	0	0	0	0	0	0.00045	0.00016	0.00033	0.00124	0.00091	4e-05	0.00026	0	0	0	0	0	0	0	0
1262873	Dorea sp. CAG:317	0.00015	0.00014	3e-05	4e-05	7e-05	4e-05	2e-05	0.00015	5e-05	7e-05	5e-05	1e-05	0	0	0	0	0	0	2e-05	0.00016	4e-05	2e-05	0	3e-05	0.0002	0	0	0	0	0	0	0	0	0.00023	6e-05	0.00022	4e-05	2e-05	4e-05	1e-05	0	0	0	0	0	0	0	0
1262872	Dorea sp. CAG:105	8e-05	0.00024	0.00015	7e-05	0.00014	0.00054	0.00037	6e-05	0.00168	0.00026	0.00067	0.00012	0	0	3e-05	0.00218	0	0	6e-05	0.00125	6e-05	0.00024	0	6e-05	5e-05	0	0	0	0	0	0	0	0	1e-05	0.00176	3e-05	6e-05	0.00015	2e-05	3e-05	0	0	0	0	0	0	0	0
2040291	Dorea sp. Marseille-P4003	7e-05	6e-05	4e-05	7e-05	3e-05	5e-05	2e-05	8e-05	7e-05	2e-05	5e-05	1e-05	0.0028	0.00024	0.00025	0.00995	0.00031	0.00103	1e-05	8e-05	7e-05	2e-05	0	4e-05	0.00013	0.00033	0.01228	0	0	0.00174	0	0.00276	0.00342	2e-05	5e-05	3e-05	6e-05	5e-05	4e-05	1e-05	0	0.00466	0.00046	0.00675	0	0	0.00034	0.00976
1235798	Dorea sp. 5-2	6e-05	0.00013	8e-05	9e-05	7e-05	0.0001	5e-05	6e-05	0.00013	7e-05	0.00013	8e-05	0	3e-05	0	8e-05	0	0	6e-05	0.00012	8e-05	6e-05	0	7e-05	0.00018	2e-05	0	0	0	0	0	0	0	0.00011	0.00014	7e-05	0.0001	4e-05	8e-05	3e-05	0.00021	0	0	0	0	0	0	0
658665	Dorea sp. D27	2e-05	2e-05	2e-05	9e-05	5e-05	2e-05	0.00013	7e-05	3e-05	0.00012	3e-05	4e-05	0.00014	0	0	0	0	0	0.00013	2e-05	7e-05	4e-05	0	3e-05	2e-05	0	0	0	0	0	0	0.00014	6e-05	1e-05	5e-05	8e-05	8e-05	1e-05	0.00011	1e-05	0	0	0	0	0	0	3e-05	0
1150298	Fusicatenibacter saccharivorans	0.01452	0.01306	0.00902	0.00702	0.02735	0.02534	0.00794	0.00593	0.04228	0.04126	0.03457	0.00794	0.0477	0.03412	0.08419	0.00439	0.00389	0.02281	0.00299	0.01818	0.01284	0.00803	0	0.00795	0.02992	0.00454	0.02061	0	0.00013	0.00606	0.00064	0.04243	0.00927	0.02017	0.04629	0.00054	0.00255	0.0328	0.00131	0.00096	0.00024	0.01736	0.01298	0.01454	0.00272	0.00578	0.00234	0.00296
39491	[Eubacterium] rectale	0.00879	0.20215	0.11189	0.05158	0.02736	0.07725	0.05596	0.05828	0.14481	0.16423	0.1006	0.20491	0.09023	0.10246	0.07498	0.03512	0.01522	0.11499	0.1158	0.14374	0.07645	0.03879	0.07551	0.13096	0.16401	0.05307	0.11225	0.00347	0.00242	0.02783	0.00267	0.18649	0.06047	0.2168	0.13913	0.01157	0.0304	0.10708	0.00011	0.00765	0.00181	0.07382	0.03319	0.05229	0.00123	0.04737	0.00314	0.00749
1952006	Lachnospiraceae bacterium UBA2886	0.00121	0.02865	0.01399	0.00708	0.00251	0.00971	0.00699	0.00965	0.01392	0.01901	0.01238	0.0211	0	4e-05	0	0	0	0	0.0104	0.02004	0.00794	0.00379	0	0.01419	0.02427	0	0	0	0	0	0	0	0	0.03105	0.01115	0.00113	0.00389	0.01019	2e-05	0.00076	0	4e-05	0	0	0	0	0	0
665950	Lachnospiraceae bacterium 3_1_46FAA	0.00106	0.00165	0.00037	0.00077	0.00322	0.00087	0.00013	0.0055	0.00118	0.00196	0.00069	0.00082	0	0	0	0	0	0	0.00042	0.00206	0.00193	0.00186	0	0.00121	0.00588	0	0	0	0	0	0	0	0	0.0017	0.00216	0.00338	0.00013	0.00064	0.00387	0.00041	0	0	0	0	0	0	0	0
1952109	Lachnospiraceae bacterium UBA638	0.00016	0.00028	6e-05	0.00012	0.0001	6e-05	4e-05	8e-05	0.00014	8e-05	0.00011	8e-05	0	0	0	0	0	0	0.00011	0.00022	6e-05	3e-05	0	7e-05	0.00036	0	0	0	0	0	0	0	0	6e-05	5e-05	0.00013	0.0001	0.0001	1e-05	3e-05	0	0	0	0	0	0	0	0
1951976	Lachnospiraceae bacterium UBA1683	0.00015	0.00016	0.00012	8e-05	0.0001	0.00013	5e-05	0.00013	0.0002	7e-05	0.00013	7e-05	0	0	0	0	0	0	7e-05	0.00019	0.00015	6e-05	0	0.00016	0.00031	0	0	0	0	0	0	0	0	0.00082	0.00011	0.0001	7e-05	0.00012	7e-05	8e-05	0	0	0	0	0	0	0	0
1952030	Lachnospiraceae bacterium UBA3316	0.00013	0.00012	4e-05	9e-05	4e-05	4e-05	3e-05	3e-05	3e-05	3e-05	4e-05	3e-05	0	0	0	0	0	0	2e-05	0.00014	5e-05	3e-05	0	5e-05	6e-05	0	0	0	0	0	0	0	0	0.00011	4e-05	2e-05	8e-05	2e-05	4e-05	2e-05	0	0	0	0	0	0	0	0
658085	Lachnospiraceae bacterium 5_1_57FAA	0.00034	0.00017	5e-05	7e-05	0.00024	7e-05	6e-05	0.00154	0.00073	0.00019	0.00013	0.00018	0	0	0	0	0	0	0.00052	0.00026	0.00164	0.00021	0	0.00187	0.00098	0	0	0	0	0	0	0	0	0.00026	0.00017	0.00023	0.0001	0.00049	0.00353	0.00017	0	0	0	0	0	0	0	0
658088	Lachnospiraceae bacterium 9_1_43BFAA	0.00015	0.00013	7e-05	8e-05	6e-05	6e-05	2e-05	0.00019	0.00027	6e-05	5e-05	0.00012	0	0	0	0	0	0	4e-05	0.00017	5e-05	9e-05	0	8e-05	8e-05	0	0	0	0	0	0	0	0	6e-05	6e-05	0.0001	7e-05	0.00014	4e-05	2e-05	0	0	0	0	0	0	0	4e-05
1703332	Lachnospiraceae bacterium TF01-11	0.0001	0.00031	0.00192	0.00032	0.00018	0.00018	6e-05	0.00028	0.00044	0.00017	0.00157	0.00053	0.0002	0.00113	4e-05	2e-05	8e-05	0.00021	0.00055	0.0003	0.00036	0.00019	0	0.00027	0.00024	0.00056	5e-05	0	0.00047	0.0004	8e-05	0.00089	0.00107	0.00055	0.00016	0.00013	0.00044	0.00026	2e-05	5e-05	0.00017	0.00046	0.00025	0.00064	0.00133	0.00291	0	0
1952098	Lachnospiraceae bacterium UBA4711	0.0001	0.0001	6e-05	0.00023	0.003	5e-05	0.00013	0.00011	6e-05	9e-05	7e-05	0.00017	0	0	0	0	0	0	0.0001	7e-05	0.00018	9e-05	0.02207	0.0006	9e-05	0	0	0	0	0	0	0	0	6e-05	5e-05	0.00016	0.00027	4e-05	1e-05	4e-05	0	0	0	0	0	0	0	0
1952105	Lachnospiraceae bacterium UBA5895	8e-05	0.00017	0.00018	0.00055	0.00019	0.00016	0.00014	0.00093	4e-05	0.00015	7e-05	3e-05	0	0	0	0	0	0	2e-05	0.00029	0.0011	4e-05	0	0.00254	8e-05	0	0	0	0	0	0	0	0	3e-05	0.00043	0.00042	0.00031	2e-05	0.00019	3e-05	0	0	0	0	0	0	0	0
397290	Lachnospiraceae bacterium A2	7e-05	0.00011	6e-05	8e-05	6e-05	8e-05	6e-05	6e-05	0.00011	9e-05	0.00011	7e-05	2e-05	0	0	0	0	0	9e-05	0.00011	8e-05	8e-05	0	7e-05	0.00024	0	3e-05	0	0	0	0	0	0	6e-05	0.0001	9e-05	7e-05	3e-05	6e-05	3e-05	0	0	2e-05	2e-05	0	0	0	0
397288	Lachnospiraceae bacterium 3-1	7e-05	0.00044	0.00018	0.00016	8e-05	0.00017	6e-05	7e-05	0.00029	9e-05	0.00023	0.00012	0	0	0	0	4e-05	3e-05	0.00018	0.00039	6e-05	7e-05	0	8e-05	0.00014	0	0	0	0	0	0	0	0	0.00028	0.00015	8e-05	0.00014	0.00019	5e-05	2e-05	0	0	0	0	0	0	0	0
658086	Lachnospiraceae bacterium 3_1_57FAA_CT1	7e-05	7e-05	9e-05	9e-05	0.00011	6e-05	8e-05	7e-05	0.00031	0.0003	7e-05	0.00013	0	0	0	0	0	0	4e-05	0.0001	0.00011	0.00022	0	6e-05	0.00054	0	0	0	0	0	0	0	0	0.00024	0.00021	0.00283	0.0001	4e-05	0.035	8e-05	0	0	0	2e-05	0	5e-05	0	0
658655	Lachnospiraceae bacterium 1_4_56FAA	8e-05	5e-05	6e-05	9e-05	0.00011	0.00011	4e-05	0.00051	0.00753	0.00018	0.00014	0.00064	0	0	0	0	0	0	0.00477	8e-05	7e-05	0.00018	0	9e-05	0.0016	0	0	0	0	0	0	0	0	0.00017	0.00014	0.00019	0.00011	0.00475	0.00011	3e-05	0	0	0	0	0	0	0	0
1392836	Lachnospiraceae bacterium TWA4	4e-05	5e-05	1e-05	0.00011	1e-05	1e-05	1e-05	2e-05	2e-05	2e-05	1e-05	1e-05	4e-05	4e-05	2e-05	2e-05	0.00014	0	1e-05	6e-05	2e-05	1e-05	0	2e-05	2e-05	0.00015	7e-05	0	0.0001	2e-05	0	6e-05	0.00019	2e-05	1e-05	2e-05	0.0001	1e-05	1e-05	1e-05	0.00014	0.00011	2e-05	2e-05	0	7e-05	0	0.0001
1952110	Lachnospiraceae bacterium UBA6403	4e-05	7e-05	0.00011	6e-05	9e-05	0.0001	0.00016	0.00011	0.0001	6e-05	0.0001	7e-05	0	0	0	0	0	0	9e-05	7e-05	4e-05	3e-05	0	0.00034	8e-05	0	0	0	0	0	0	0	0	0.00011	4e-05	0.00048	8e-05	8e-05	1e-05	4e-05	0	0	0	0	0	0	0	0
742723	Lachnospiraceae bacterium 2_1_46FAA	3e-05	4e-05	2e-05	7e-05	3e-05	3e-05	1e-05	6e-05	6e-05	1e-05	3e-05	2e-05	0	4e-05	4e-05	0	0.0004	0	1e-05	4e-05	6e-05	1e-05	0	4e-05	9e-05	0.00053	0	0	0	0	0	2e-05	0	0.00109	4e-05	3e-05	7e-05	4e-05	2e-05	2e-05	0	0	1e-05	2e-05	0	0	0.00021	2e-05
1235793	Lachnospiraceae bacterium COE1	3e-05	5e-05	7e-05	0.00017	7e-05	7e-05	8e-05	8e-05	7e-05	6e-05	8e-05	0.0001	6e-05	0.00011	0.00017	7e-05	0.00026	3e-05	4e-05	5e-05	5e-05	0.0001	0	6e-05	5e-05	5e-05	0.0001	0	0.00022	6e-05	5e-05	7e-05	0.00014	4e-05	7e-05	5e-05	0.00017	2e-05	3e-05	3e-05	0.00027	0.00011	3e-05	5e-05	3e-05	0.00011	8e-05	9e-05
1952172	Lachnospiraceae bacterium UBA7598	3e-05	9e-05	0.00126	0.00022	0.00035	0.00184	0.00019	3e-05	0.00036	0.00165	0.0008	7e-05	0	0	0	0	0	0	0.00015	0.00011	0.00063	3e-05	0	0.00136	0.0001	0	0	0	0	0	0	0	0	0.0001	0.00041	0.00016	0.00039	0.00012	1e-05	0.00035	0	0	0	0	0	0	0	0
1235799	Lachnospiraceae bacterium 3-2	3e-05	4e-05	3e-05	5e-05	3e-05	4e-05	2e-05	7e-05	3e-05	2e-05	4e-05	3e-05	0	0.00024	0	2e-05	4e-05	0	2e-05	4e-05	5e-05	2e-05	0	3e-05	5e-05	2e-05	0	0	0	0	0	0	2e-05	2e-05	3e-05	4e-05	6e-05	1e-05	3e-05	1e-05	0	4e-05	1e-05	0	3e-05	0	0	2e-05
1930015	Lachnospiraceae bacterium Zagget2	3e-05	2e-05	4e-05	8e-05	4e-05	3e-05	5e-05	2e-05	2e-05	2e-05	3e-05	1e-05	0	0	0	0	0	0	4e-05	3e-05	2e-05	3e-05	0	2e-05	2e-05	0	0	0	0	0	0	0	0	1e-05	3e-05	4e-05	7e-05	1e-05	3e-05	3e-05	0	0	0	0	0	0	0	0
1898203	Lachnospiraceae bacterium	3e-05	3e-05	2e-05	8e-05	3e-05	3e-05	2e-05	2e-05	3e-05	2e-05	3e-05	2e-05	0	0	0	0	0	0	3e-05	3e-05	2e-05	2e-05	0	2e-05	2e-05	0	0	0	0	0	0	0	0	1e-05	2e-05	2e-05	8e-05	2e-05	1e-05	1e-05	0	0	0	0	0	0	0	0
2002841	Lachnospiraceae bacterium Marseille-P3773	2e-05	3e-05	2e-05	6e-05	2e-05	2e-05	1e-05	2e-05	1e-05	2e-05	2e-05	1e-05	0.00024	0.00036	0.00021	0.00013	0.00053	0.00013	0	3e-05	2e-05	1e-05	0	2e-05	2e-05	0.00045	0.00022	0.00024	0.00048	0.00032	0	0.00025	9e-05	2e-05	2e-05	2e-05	6e-05	1e-05	1e-05	0	0.00024	0.00033	9e-05	0.00141	8e-05	0.0002	4e-05	0.00047
1235792	Lachnospiraceae bacterium M18-1	2e-05	2e-05	4e-05	8e-05	3e-05	4e-05	3e-05	4e-05	4e-05	4e-05	4e-05	3e-05	0	0	0	0	0	0	4e-05	3e-05	8e-05	5e-05	0	5e-05	7e-05	0	0	0	0	0	0	0	0	2e-05	0.00014	4e-05	8e-05	2e-05	0.00013	2e-05	7e-05	0	0	0	2e-05	0	0	0
1235800	Lachnospiraceae bacterium 10-1	2e-05	5e-05	4e-05	0.00013	3e-05	3e-05	4e-05	2e-05	4e-05	5e-05	3e-05	0.00011	0.00015	0.00014	2e-05	0.00026	8e-05	0.00023	1e-05	4e-05	4e-05	3e-05	0	5e-05	4e-05	7e-05	0.00011	0.00044	0.00045	7e-05	0.0001	0	0.00011	1e-05	2e-05	6e-05	0.00012	1e-05	7e-05	1e-05	0.00089	8e-05	9e-05	0.00012	2e-05	4e-05	0.00011	0.0003
397287	Lachnospiraceae bacterium 28-4	2e-05	2e-05	4e-05	0.00011	4e-05	5e-05	3e-05	3e-05	6e-05	3e-05	7e-05	4e-05	2e-05	0	2e-05	0.00012	0.0004	0.0001	3e-05	3e-05	4e-05	5e-05	0	6e-05	0.00017	0.00019	0.00025	0.0002	0.00022	7e-05	0.00019	0	7e-05	0.00025	5e-05	5e-05	0.0001	2e-05	4e-05	2e-05	0.00034	0	0.00015	0.00018	3e-05	0.00015	7e-05	0.00031
1952133	Lachnospiraceae bacterium UBA7093	2e-05	4e-05	2e-05	0.00013	3e-05	2e-05	2e-05	2e-05	2e-05	1e-05	3e-05	2e-05	0	0	0	0	0	0	2e-05	3e-05	3e-05	2e-05	0	4e-05	1e-05	0	0	0	0	0	0	0	0	1e-05	2e-05	2e-05	0.00012	1e-05	2e-05	1e-05	0	0	0	0	0	0	0	0
1952004	Lachnospiraceae bacterium UBA2882	2e-05	2e-05	8e-05	0.00016	6e-05	8e-05	4e-05	3e-05	7e-05	3e-05	6e-05	0.00016	0	0	0	0	0	0	4e-05	3e-05	4e-05	4e-05	0	8e-05	4e-05	0	0	0	0	0	0	0	0	6e-05	5e-05	8e-05	0.00015	5e-05	1e-05	2e-05	0	0	0	0	0	0	0	0
1952145	Lachnospiraceae bacterium UBA7164	9e-05	0.0001	1e-05	3e-05	2e-05	3e-05	1e-05	0.00014	2e-05	0.00058	4e-05	9e-05	0	0	0	0	0	0	0	0.00016	6e-05	0.0002	0	4e-05	0.00018	0	0	0	0	0	0	0	0	1e-05	1e-05	2e-05	3e-05	1e-05	1e-05	1e-05	0	0	0	0	0	0	0	0
1952144	Lachnospiraceae bacterium UBA7160	2e-05	1e-05	3e-05	9e-05	5e-05	4e-05	6e-05	3e-05	3e-05	3e-05	5e-05	1e-05	0	0	0	0	0	0	1e-05	2e-05	3e-05	2e-05	0	4e-05	3e-05	0	0	0	0	0	0	0	0	3e-05	4e-05	4e-05	7e-05	1e-05	3e-05	2e-05	0	0	0	0	0	0	0	0
1951989	Lachnospiraceae bacterium UBA1818	2e-05	1e-05	2e-05	4e-05	2e-05	2e-05	2e-05	2e-05	3e-05	1e-05	2e-05	1e-05	0	0	0	0	0	0	3e-05	2e-05	9e-05	2e-05	0	2e-05	2e-05	0	0	0	0	0	0	0	0	1e-05	2e-05	2e-05	4e-05	1e-05	2e-05	1e-05	0	0	0	0	0	0	0	0
1952150	Lachnospiraceae bacterium UBA7182	2e-05	2e-05	4e-05	7e-05	3e-05	3e-05	2e-05	2e-05	1e-05	2e-05	3e-05	1e-05	0	0	0	0	0	0	1e-05	3e-05	3e-05	1e-05	0	3e-05	2e-05	0	0	0	0	0	0	0	0	1e-05	4e-05	3e-05	7e-05	1e-05	2e-05	2e-05	0	0	0	0	0	0	0	0
1952134	Lachnospiraceae bacterium UBA7096	2e-05	3e-05	1e-05	3e-05	2e-05	1e-05	1e-05	2e-05	2e-05	1e-05	1e-05	2e-05	0	0	0	0	0	0	1e-05	2e-05	2e-05	1e-05	0	1e-05	1e-05	0	0	0	0	0	0	0	0	1e-05	2e-05	1e-05	3e-05	1e-05	1e-05	1e-05	0	0	0	0	0	0	0	0
1952171	Lachnospiraceae bacterium UBA7589	2e-05	8e-05	5e-05	0.0002	5e-05	5e-05	6e-05	2e-05	4e-05	4e-05	6e-05	8e-05	0	0	0	0	0	0	2e-05	7e-05	2e-05	2e-05	0	3e-05	8e-05	0	0	0	0	0	0	0	0	6e-05	1e-05	4e-05	0.00017	2e-05	1e-05	2e-05	0	0	0	0	0	0	0	0
1952114	Lachnospiraceae bacterium UBA6452	3e-05	8e-05	0.00021	0.00014	4e-05	0.00026	8e-05	4e-05	6e-05	6e-05	0.00013	3e-05	0	0	0	0	0	0	3e-05	8e-05	4e-05	2e-05	0	0.00014	0.00011	0	0	0	0	0	0	0	0	5e-05	3e-05	0.00012	0.00014	3e-05	1e-05	5e-05	0	0	0	0	0	0	0	0
1410633	Lachnospiraceae bacterium YSB2008	2e-05	4e-05	1e-05	5e-05	1e-05	1e-05	1e-05	1e-05	2e-05	1e-05	1e-05	3e-05	0	0	0	0	0	0	1e-05	3e-05	1e-05	1e-05	0	1e-05	3e-05	0	0	0	0	0	0	0	0	1e-05	1e-05	1e-05	5e-05	1e-05	0	0	0	0	0	0	0	0	0	0
397291	Lachnospiraceae bacterium A4	2e-05	3e-05	4e-05	0.00012	5e-05	5e-05	3e-05	4e-05	7e-05	5e-05	7e-05	6e-05	2e-05	0	0	2e-05	0	0.00013	6e-05	3e-05	4e-05	5e-05	0	4e-05	6e-05	2e-05	0.00011	7e-05	0	2e-05	0.00021	4e-05	2e-05	3e-05	7e-05	4e-05	0.00012	3e-05	6e-05	1e-05	0	4e-05	9e-05	2e-05	0	0.00011	9e-05	2e-05
1408324	Lachnospiraceae bacterium MC2017	2e-05	2e-05	2e-05	1e-05	1e-05	1e-05	0	1e-05	1e-05	0	1e-05	0	0	0	0	0	0	0	0	2e-05	1e-05	0	0	2e-05	1e-05	0	0	0	0	0	0	0	0	0	1e-05	1e-05	2e-05	1e-05	0	0	0	0	0	0	0	0	0	0
1952158	Lachnospiraceae bacterium UBA7225	1e-05	1e-05	1e-05	8e-05	2e-05	2e-05	2e-05	2e-05	1e-05	2e-05	2e-05	1e-05	0	0	0	0	0	0	1e-05	2e-05	3e-05	2e-05	0	2e-05	1e-05	0	0	0	0	0	0	0	0	1e-05	3e-05	2e-05	7e-05	1e-05	1e-05	2e-05	0	0	0	0	0	0	0	0
1952136	Lachnospiraceae bacterium UBA7109	1e-05	2e-05	1e-05	3e-05	1e-05	1e-05	1e-05	2e-05	1e-05	1e-05	2e-05	2e-05	0	0	0	0	0	0	1e-05	2e-05	2e-05	1e-05	0	1e-05	1e-05	0	0	0	0	0	0	0	0	0	1e-05	2e-05	2e-05	1e-05	2e-05	0	0	0	0	0	0	0	0	0
1520827	Lachnospiraceae bacterium XBB1006	1e-05	1e-05	1e-05	4e-05	1e-05	1e-05	1e-05	2e-05	2e-05	1e-05	1e-05	2e-05	0.00022	0.04573	0.00021	0.0046	0.00025	0.00119	1e-05	1e-05	1e-05	1e-05	0	2e-05	2e-05	0.00021	0.00027	0.00073	0.0058	0.00023	7e-05	0.0003	0.00485	1e-05	1e-05	2e-05	4e-05	1e-05	1e-05	0	0.00165	0.00011	0.00019	0.00014	8e-05	0.00148	0.00093	0.0006
1952097	Lachnospiraceae bacterium UBA4631	1e-05	1e-05	2e-05	0.029	5e-05	2e-05	1e-05	1e-05	2e-05	2e-05	3e-05	1e-05	0	0	0	0	0	0	1e-05	2e-05	1e-05	0	0	2e-05	1e-05	0	0	0	0	0	0	0	0	2e-05	1e-05	4e-05	0.0267	1e-05	1e-05	0	0	0	0	0	0	0	0	0
1410632	Lachnospiraceae bacterium V9D3004	1e-05	1e-05	1e-05	4e-05	2e-05	1e-05	1e-05	1e-05	1e-05	1e-05	1e-05	2e-05	0	0	0	0	0	0	1e-05	1e-05	1e-05	1e-05	0	1e-05	1e-05	0	0	0	0	0	0	0	0	2e-05	1e-05	1e-05	3e-05	0	0	0	0	0	2e-05	0	0	0	0	0
1952139	Lachnospiraceae bacterium UBA7125	1e-05	3e-05	2e-05	0.00014	1e-05	2e-05	1e-05	3e-05	2e-05	1e-05	2e-05	1e-05	0	0	0	0	0	0	1e-05	3e-05	3e-05	1e-05	0	3e-05	3e-05	0	0	0	0	0	0	0	0	1e-05	1e-05	2e-05	0.00014	1e-05	2e-05	1e-05	0	0	0	2e-05	0	0	0	0
1952153	Lachnospiraceae bacterium UBA7199	1e-05	2e-05	2e-05	8e-05	2e-05	2e-05	1e-05	1e-05	2e-05	1e-05	2e-05	1e-05	0	0	0	0	0	0	2e-05	2e-05	1e-05	0	0	2e-05	1e-05	0	0	0	0	0	0	0	0	1e-05	1e-05	2e-05	8e-05	1e-05	2e-05	1e-05	0	0	0	0	0	0	0	0
1408319	Lachnospiraceae bacterium AB2028	1e-05	2e-05	0	3e-05	1e-05	1e-05	1e-05	1e-05	1e-05	0	2e-05	1e-05	0	0	0	0	0	0	1e-05	2e-05	1e-05	0	0	1e-05	1e-05	0	0	0	0	0	0	0	0	0	1e-05	1e-05	3e-05	0	1e-05	0	0	0	0	0	0	0	0	0
1952127	Lachnospiraceae bacterium UBA7050	1e-05	1e-05	1e-05	0.00011	2e-05	2e-05	1e-05	1e-05	2e-05	1e-05	2e-05	2e-05	0	0	0	0	0	0	0	1e-05	1e-05	1e-05	0	2e-05	1e-05	0	0	0	0	0	0	0	0	1e-05	1e-05	3e-05	0.0001	1e-05	1e-05	1e-05	0	0	0	0	0	0	0	0
1952174	Lachnospiraceae bacterium UBA7729	1e-05	1e-05	1e-05	2e-05	1e-05	1e-05	2e-05	1e-05	2e-05	1e-05	1e-05	0	0	0	0	0	0	0	1e-05	1e-05	1e-05	2e-05	0	2e-05	1e-05	0	0	0	0	0	0	0	0	1e-05	1e-05	1e-05	2e-05	1e-05	1e-05	1e-05	0	0	0	0	0	0	0	0
1520820	Lachnospiraceae bacterium XBD2001	1e-05	3e-05	1e-05	5e-05	2e-05	1e-05	1e-05	2e-05	2e-05	2e-05	2e-05	3e-05	0.00016	0.00017	6e-05	4e-05	0.00018	3e-05	2e-05	3e-05	1e-05	1e-05	0	3e-05	3e-05	8e-05	7e-05	0	0.00014	0.00011	0	0.00023	0.00203	2e-05	2e-05	2e-05	4e-05	1e-05	1e-05	1e-05	0	0.00022	0	9e-05	2e-05	7e-05	0	0.00025
1408323	Lachnospiraceae bacterium MA2020	1e-05	3e-05	1e-05	6e-05	2e-05	1e-05	1e-05	1e-05	2e-05	1e-05	1e-05	9e-05	0	0	0	0	0	0	1e-05	3e-05	1e-05	2e-05	0	1e-05	3e-05	0	0	0	0	0	0	0	0	1e-05	1e-05	1e-05	5e-05	1e-05	0	0	0	0	0	0	0	0	0	0
1520822	Lachnospiraceae bacterium C10	1e-05	2e-05	3e-05	5e-05	2e-05	3e-05	2e-05	2e-05	3e-05	1e-05	2e-05	3e-05	0	0	0	2e-05	0	0	2e-05	2e-05	2e-05	1e-05	0	3e-05	3e-05	0	0	0	0	0	0	0	0	7e-05	1e-05	2e-05	5e-05	1e-05	1e-05	1e-05	5e-05	0	0	0	0	0	0	0
1952013	Lachnospiraceae bacterium UBA2906	1e-05	1e-05	2e-05	4e-05	2e-05	2e-05	2e-05	1e-05	1e-05	4e-05	2e-05	2e-05	0	0	0	0	0	0	2e-05	2e-05	3e-05	4e-05	0	4e-05	2e-05	0	0	0	0	0	0	0	0	1e-05	3e-05	2e-05	4e-05	1e-05	1e-05	1e-05	0	0	0	0	0	0	0	0
1952155	Lachnospiraceae bacterium UBA7205	1e-05	1e-05	2e-05	0.0001	2e-05	5e-05	1e-05	2e-05	4e-05	1e-05	8e-05	1e-05	0	0	0	0	0	0	1e-05	1e-05	3e-05	1e-05	0	2e-05	1e-05	0	0	0	0	0	0	0	0	1e-05	2e-05	2e-05	0.0001	1e-05	2e-05	1e-05	0	0	0	0	0	0	0	0
1952096	Lachnospiraceae bacterium UBA4630	1e-05	2e-05	4e-05	0.0003	0.00015	4e-05	4e-05	1e-05	0.0001	6e-05	4e-05	3e-05	0	0	0	0	0	0	9e-05	2e-05	5e-05	4e-05	0.02301	0.00024	4e-05	0	0	0	0	0	0	0	0	2e-05	0.0001	0.00124	0.00032	7e-05	2e-05	1e-05	0	0	0	0	0	0	0	0
1952054	Lachnospiraceae bacterium UBA3772	1e-05	2e-05	1e-05	2e-05	1e-05	1e-05	1e-05	1e-05	1e-05	1e-05	1e-05	0	0	0	0	0	0	0	1e-05	2e-05	1e-05	0	0	1e-05	1e-05	0	0	0	0	0	0	0	0	2e-05	0	1e-05	2e-05	1e-05	0	0	0	0	0	0	0	0	0	0
658083	Lachnospiraceae bacterium 6_1_63FAA	2e-05	1e-05	2e-05	8e-05	3e-05	3e-05	1e-05	0.00014	4e-05	2e-05	2e-05	4e-05	0	0	0	0	0	0	1e-05	4e-05	3e-05	1e-05	0	3e-05	0.00011	0	0	0	0	0	0	0	0	9e-05	2e-05	7e-05	3e-05	2e-05	4e-05	4e-05	0	0	0	0	0	0	0	0
877406	Lachnospiraceae bacterium NK3A20	1e-05	1e-05	1e-05	7e-05	2e-05	1e-05	2e-05	1e-05	2e-05	1e-05	1e-05	1e-05	0.00012	0.00019	4e-05	0.00024	0.00025	5e-05	1e-05	1e-05	1e-05	1e-05	0	2e-05	1e-05	5e-05	0.00017	0.00027	0.00043	6e-05	0.00014	2e-05	0.00012	1e-05	1e-05	2e-05	7e-05	1e-05	2e-05	1e-05	0.00024	7e-05	0.00013	6e-05	3e-05	3e-05	4e-05	0.00033
1952130	Lachnospiraceae bacterium UBA7060	1e-05	1e-05	2e-05	9e-05	2e-05	2e-05	1e-05	2e-05	1e-05	2e-05	2e-05	1e-05	0	0	0	0	0	0	2e-05	2e-05	2e-05	2e-05	0	4e-05	2e-05	0	0	0	0	0	0	0	0	0	3e-05	2e-05	8e-05	0	2e-05	1e-05	0	0	0	0	0	0	0	0
1792306	Lachnospiraceae bacterium C7	1e-05	3e-05	2e-05	9e-05	1e-05	2e-05	1e-05	1e-05	3e-05	2e-05	2e-05	5e-05	0	0	0	0	0	0	2e-05	3e-05	1e-05	1e-05	0	1e-05	3e-05	0	0	0	0	0	0	0	0	3e-05	1e-05	1e-05	9e-05	2e-05	1e-05	1e-05	0	0	0	0	0	0	0	0
1410624	Lachnospiraceae bacterium FE2018	1e-05	2e-05	1e-05	4e-05	3e-05	1e-05	1e-05	2e-05	2e-05	1e-05	2e-05	0	0	0	0	0	0	0	0	2e-05	1e-05	1e-05	0	1e-05	1e-05	0	0	0	0	0	0	0	0	1e-05	1e-05	1e-05	4e-05	1e-05	2e-05	1e-05	0	0	0	0	0	0	0	0
1952079	Lachnospiraceae bacterium UBA4260	1e-05	1e-05	1e-05	4e-05	1e-05	1e-05	2e-05	1e-05	1e-05	1e-05	1e-05	0	0	0	0	0	0	0	1e-05	1e-05	1e-05	1e-05	0	2e-05	1e-05	0	0	0	0	0	0	0	0	0	1e-05	1e-05	4e-05	1e-05	2e-05	1e-05	0	0	0	0	0	0	0	0
1951985	Lachnospiraceae bacterium UBA1759	1e-05	1e-05	1e-05	4e-05	2e-05	1e-05	3e-05	1e-05	1e-05	1e-05	1e-05	1e-05	0	0	0	0	0	0	1e-05	1e-05	1e-05	2e-05	0	2e-05	1e-05	0	0	0	0	0	0	0	0	0	1e-05	2e-05	4e-05	0	2e-05	3e-05	0	0	0	0	0	0	0	0
1952128	Lachnospiraceae bacterium UBA7054	1e-05	1e-05	1e-05	0.00012	1e-05	1e-05	1e-05	1e-05	1e-05	1e-05	1e-05	0	0	0	0	0	0	0	0	1e-05	1e-05	1e-05	0	2e-05	1e-05	0	0	0	0	0	0	0	0	0	1e-05	2e-05	0.00012	0	2e-05	1e-05	0	0	0	0	0	0	0	0
1952125	Lachnospiraceae bacterium UBA7027	1e-05	1e-05	1e-05	4e-05	1e-05	1e-05	1e-05	1e-05	1e-05	0	1e-05	1e-05	0	0	0	0	0	0	2e-05	1e-05	1e-05	1e-05	0	1e-05	1e-05	0	0	0	0	0	0	0	0	0	1e-05	1e-05	4e-05	0	1e-05	1e-05	0	0	0	0	0	0	0	0
1952120	Lachnospiraceae bacterium UBA7012	1e-05	0	0	3e-05	1e-05	1e-05	2e-05	0	1e-05	1e-05	1e-05	1e-05	0	0	0	0	0	0	1e-05	0	1e-05	2e-05	0	1e-05	0	0	0	0	0	0	0	0	0	0	1e-05	1e-05	3e-05	0	3e-05	2e-05	0	0	0	0	0	0	0	0
1392493	Lachnospiraceae bacterium AC2031	1e-05	1e-05	1e-05	6e-05	4e-05	0	0	0	0	0	1e-05	0	0	2e-05	0	2e-05	4e-05	3e-05	0	1e-05	1e-05	0	0	1e-05	1e-05	5e-05	0	6e-05	5e-05	2e-05	0	0	2e-05	0	0	0	6e-05	0	0	0	0	0	1e-05	0	0	0	6e-05	2e-05
1458462	Lachnospiraceae bacterium AC2029	1e-05	1e-05	1e-05	7e-05	2e-05	1e-05	1e-05	1e-05	2e-05	1e-05	1e-05	2e-05	0	0	0	0	0	0	1e-05	1e-05	2e-05	1e-05	0	1e-05	1e-05	0	0	0	0	2e-05	0	0	0	2e-05	1e-05	1e-05	7e-05	1e-05	1e-05	1e-05	0	0	0	0	0	0	0	0
1520828	Lachnospiraceae bacterium YSD2013	1e-05	1e-05	1e-05	0.0001	2e-05	1e-05	1e-05	1e-05	1e-05	1e-05	1e-05	0	4e-05	0	0	7e-05	0.00011	3e-05	1e-05	1e-05	1e-05	1e-05	0	4e-05	1e-05	3e-05	2e-05	0.00018	0.00014	2e-05	7e-05	0	3e-05	1e-05	1e-05	2e-05	9e-05	0	1e-05	1e-05	5e-05	0	2e-05	8e-05	0	0	2e-05	0.00013
1951983	Lachnospiraceae bacterium UBA1753	1e-05	2e-05	1e-05	6e-05	1e-05	1e-05	1e-05	1e-05	1e-05	1e-05	1e-05	2e-05	0	0	0	0	0	0	0	2e-05	1e-05	0	0	2e-05	1e-05	0	0	0	0	0	0	0	0	1e-05	1e-05	1e-05	6e-05	1e-05	1e-05	0	0	0	0	0	0	0	0	0
1952063	Lachnospiraceae bacterium UBA3820	1e-05	3e-05	1e-05	3e-05	1e-05	0	1e-05	1e-05	1e-05	1e-05	0	1e-05	0	0	0	0	0	0	0	2e-05	1e-05	0	0	2e-05	2e-05	0	0	0	0	0	0	0	0	1e-05	0	1e-05	3e-05	0	0	0	0	0	0	0	0	0	0	0
1952107	Lachnospiraceae bacterium UBA5902	4e-05	0.00039	0.00019	0.00041	0.00086	0.00016	0.00025	3e-05	0.00014	0.00013	9e-05	0.00123	0	0	0	0	0	0	5e-05	0.00025	8e-05	0.00013	0	0.00019	5e-05	0	0	0	0	0	0	0	0	0.00012	0.00014	0.00086	0.00025	7e-05	0.00021	5e-05	0	0	0	0	0	0	0	0
1951987	Lachnospiraceae bacterium UBA1766	1e-05	2e-05	1e-05	0.00011	1e-05	1e-05	1e-05	1e-05	1e-05	1e-05	1e-05	1e-05	0	0	0	0	0	0	0	2e-05	1e-05	0	0	2e-05	1e-05	0	0	0	0	0	0	0	0	0	1e-05	2e-05	0.0001	0	1e-05	0	0	0	0	0	0	0	0	0
1952141	Lachnospiraceae bacterium UBA7143	1e-05	1e-05	1e-05	0.00016	1e-05	2e-05	2e-05	2e-05	2e-05	2e-05	1e-05	1e-05	0	0	0	0	0	0	1e-05	1e-05	2e-05	1e-05	0	2e-05	1e-05	0	0	0	0	0	0	0	0	2e-05	1e-05	2e-05	0.00015	1e-05	2e-05	1e-05	0	0	0	0	0	0	0	0
1952019	Lachnospiraceae bacterium UBA2942	1e-05	1e-05	1e-05	5e-05	1e-05	1e-05	1e-05	1e-05	1e-05	1e-05	1e-05	1e-05	0	0	0	0	0	0	0	2e-05	1e-05	0	0	2e-05	1e-05	0	0	0	0	0	0	0	0	2e-05	1e-05	1e-05	5e-05	0	1e-05	0	0	0	0	0	0	0	0	0
1952131	Lachnospiraceae bacterium UBA7076	1e-05	1e-05	1e-05	5e-05	2e-05	1e-05	0	1e-05	1e-05	1e-05	1e-05	0	0	0	0	0	0	0	0	1e-05	1e-05	0	0	2e-05	1e-05	0	0	0	0	0	0	0	0	3e-05	1e-05	1e-05	4e-05	0	1e-05	0	0	0	0	0	0	0	0	0
1952000	Lachnospiraceae bacterium UBA2856	1e-05	1e-05	1e-05	5e-05	2e-05	1e-05	4e-05	2e-05	1e-05	1e-05	1e-05	0	0	0	0	0	0	0	3e-05	1e-05	1e-05	3e-05	0	2e-05	2e-05	0	0	0	0	0	0	0	0	0	2e-05	2e-05	5e-05	0	2e-05	2e-05	0	0	0	0	0	0	0	0
1952088	Lachnospiraceae bacterium UBA4348	1e-05	1e-05	1e-05	5e-05	1e-05	1e-05	2e-05	1e-05	1e-05	2e-05	1e-05	1e-05	0	0	0	0	0	0	1e-05	1e-05	1e-05	2e-05	0	2e-05	1e-05	0	0	0	0	0	0	0	0	0	1e-05	1e-05	5e-05	0	2e-05	2e-05	0	0	0	0	0	0	0	0
1952029	Lachnospiraceae bacterium UBA3310	1e-05	1e-05	1e-05	0.00014	2e-05	2e-05	1e-05	1e-05	1e-05	1e-05	2e-05	2e-05	0	0	0	0	0	0	1e-05	1e-05	1e-05	1e-05	0	2e-05	1e-05	0	0	0	0	0	0	0	0	0	2e-05	1e-05	0.00014	0	2e-05	1e-05	0	0	0	0	0	0	0	0
1952032	Lachnospiraceae bacterium UBA3386	1e-05	1e-05	1e-05	4e-05	1e-05	1e-05	2e-05	1e-05	1e-05	1e-05	1e-05	2e-05	2e-05	0	0	0	0	0	1e-05	1e-05	1e-05	3e-05	0	1e-05	2e-05	0	0	3e-05	0	0	0	0	0	0	1e-05	2e-05	3e-05	0	2e-05	2e-05	0	0	0	0	0	0	0	2e-05
1951978	Lachnospiraceae bacterium UBA1712	1e-05	1e-05	1e-05	6e-05	1e-05	1e-05	0	0	1e-05	0	0	0	0	0	0	0	0	0	0	1e-05	1e-05	0	0	1e-05	1e-05	0	0	0	0	0	0	0	0	1e-05	1e-05	1e-05	6e-05	0	0	0	0	0	0	0	0	0	0	0
1952154	Lachnospiraceae bacterium UBA7202	1e-05	7e-05	3e-05	0.0002	3e-05	4e-05	3e-05	2e-05	3e-05	2e-05	2e-05	1e-05	0	0	0	0	0	0	2e-05	6e-05	5e-05	1e-05	0	4e-05	4e-05	0	0	0	0	0	0	0	0	1e-05	2e-05	4e-05	0.00018	2e-05	2e-05	4e-05	0	0	0	0	0	0	0	0
1952152	Lachnospiraceae bacterium UBA7196	1e-05	1e-05	1e-05	0.00017	1e-05	1e-05	2e-05	1e-05	2e-05	1e-05	1e-05	1e-05	0	0	0	0	0	0	1e-05	1e-05	2e-05	1e-05	0	2e-05	1e-05	0	0	0	0	0	0	0	0	1e-05	2e-05	2e-05	0.00016	1e-05	2e-05	1e-05	0	0	0	0	0	0	0	0
1951980	Lachnospiraceae bacterium UBA1721	1e-05	0	1e-05	3e-05	1e-05	1e-05	1e-05	1e-05	1e-05	1e-05	1e-05	1e-05	0	0	0	0	0	0	0	1e-05	1e-05	0	0	1e-05	1e-05	0	0	0	0	0	0	0	0	1e-05	1e-05	1e-05	3e-05	0	1e-05	0	0	0	0	0	0	0	0	0
1951997	Lachnospiraceae bacterium UBA2825	1e-05	4e-05	4e-05	6e-05	2e-05	4e-05	2e-05	2e-05	4e-05	5e-05	4e-05	5e-05	0	0	0	0	0	0	4e-05	3e-05	3e-05	3e-05	0	4e-05	0.00012	0	0	0	0	0	0	0	0	4e-05	2e-05	5e-05	6e-05	3e-05	1e-05	3e-05	0	0	0	0	0	0	0	0
1952002	Lachnospiraceae bacterium UBA2864	1e-05	1e-05	2e-05	3e-05	2e-05	1e-05	0	1e-05	0	1e-05	2e-05	3e-05	0	0	0	0	0	0	0	1e-05	1e-05	1e-05	0	1e-05	2e-05	0	0	0	0	0	0	0	0	0	1e-05	1e-05	2e-05	0	0	0	0	0	0	0	0	0	0	0
1952023	Lachnospiraceae bacterium UBA3282	1e-05	1e-05	1e-05	0.00015	1e-05	2e-05	1e-05	1e-05	1e-05	1e-05	2e-05	1e-05	0	0	0	0	0	0	1e-05	1e-05	2e-05	1e-05	0	1e-05	0	0	0	0	0	0	0	0	0	1e-05	1e-05	2e-05	0.00014	0	2e-05	1e-05	0	0	0	0	0	0	0	0
1952022	Lachnospiraceae bacterium UBA3273	1e-05	1e-05	1e-05	8e-05	1e-05	1e-05	1e-05	1e-05	1e-05	1e-05	2e-05	1e-05	0	0	0	0	0	0	2e-05	1e-05	2e-05	1e-05	0	2e-05	1e-05	0	0	0	0	0	0	0	0	1e-05	2e-05	2e-05	8e-05	1e-05	2e-05	1e-05	0	0	0	0	0	0	0	0
1952045	Lachnospiraceae bacterium UBA3687	1e-05	1e-05	1e-05	4e-05	1e-05	1e-05	1e-05	1e-05	1e-05	1e-05	1e-05	1e-05	0	0	0	0	0	0	1e-05	1e-05	1e-05	1e-05	0	1e-05	1e-05	0	0	0	0	0	0	0	0	0	1e-05	1e-05	4e-05	0	1e-05	1e-05	0	0	0	0	0	0	0	0
1952123	Lachnospiraceae bacterium UBA7023	1e-05	1e-05	0	3e-05	1e-05	0	2e-05	1e-05	1e-05	1e-05	1e-05	2e-05	0	0	0	0	0	0	1e-05	1e-05	1e-05	2e-05	0	1e-05	1e-05	0	0	0	0	0	0	0	0	0	2e-05	1e-05	3e-05	0	1e-05	2e-05	0	0	0	0	0	0	0	0
1952067	Lachnospiraceae bacterium UBA3845	1e-05	1e-05	1e-05	6e-05	1e-05	1e-05	2e-05	1e-05	1e-05	1e-05	1e-05	1e-05	0	0	0	0	0	0	1e-05	1e-05	1e-05	2e-05	0	1e-05	1e-05	0	0	0	0	0	0	0	0	0	1e-05	1e-05	6e-05	0	1e-05	1e-05	0	0	0	0	0	0	0	0
877421	Lachnospiraceae bacterium NK4A144	1e-05	1e-05	2e-05	2e-05	1e-05	2e-05	1e-05	1e-05	1e-05	1e-05	2e-05	1e-05	0	0	0	0	0	0	1e-05	1e-05	0	0	0	1e-05	1e-05	0	0	0	0	0	0	0	0	2e-05	1e-05	1e-05	2e-05	1e-05	0	0	0	0	0	0	0	0	0	0
1930016	Lachnospiraceae bacterium Zagget3	1e-05	1e-05	1e-05	3e-05	1e-05	1e-05	3e-05	1e-05	1e-05	1e-05	1e-05	1e-05	0	0	0	0	0	0	1e-05	1e-05	1e-05	2e-05	0	1e-05	2e-05	0	0	0	0	0	0	0	0	0	1e-05	1e-05	3e-05	0	3e-05	2e-05	0	0	0	0	0	0	0	0
1952046	Lachnospiraceae bacterium UBA3689	1e-05	1e-05	0	2e-05	1e-05	1e-05	1e-05	1e-05	1e-05	0	1e-05	1e-05	0	0	0	0	0	0	1e-05	1e-05	1e-05	1e-05	0	1e-05	1e-05	0	0	0	0	0	0	0	0	0	1e-05	1e-05	2e-05	0	2e-05	2e-05	0	0	0	0	0	0	0	0
1952160	Lachnospiraceae bacterium UBA7257	1e-05	1e-05	1e-05	5e-05	1e-05	1e-05	1e-05	1e-05	1e-05	1e-05	1e-05	1e-05	0	0	0	0	0	0	1e-05	1e-05	1e-05	0	0	3e-05	6e-05	0	0	0	0	0	0	0	0	0	1e-05	1e-05	4e-05	0	0	1e-05	0	0	0	0	0	0	0	0
712976	Lachnospiraceae bacterium oral taxon 082	1e-05	0	2e-05	3e-05	3e-05	5e-05	1e-05	1e-05	7e-05	1e-05	6e-05	1e-05	0	0	0	0	0	0	4e-05	1e-05	0	2e-05	0	1e-05	0.00028	0	0	0	0	0	0	0	0	7e-05	1e-05	1e-05	2e-05	2e-05	1e-05	0	0	0	0	0	0	0	0	0
1951973	Lachnospiraceae bacterium UBA1251	1e-05	0	1e-05	2e-05	1e-05	1e-05	2e-05	0	1e-05	0	0	0	0	0	0	0	0	0	0	0	1e-05	1e-05	0	1e-05	0	0	0	0	0	0	0	0	0	0	0	1e-05	2e-05	0	2e-05	1e-05	0	0	0	0	0	0	0	0
1200721	Lachnospiraceae bacterium RM5	1e-05	1e-05	1e-05	0.00024	2e-05	1e-05	0	1e-05	1e-05	1e-05	2e-05	2e-05	2e-05	0	0	0	0	0	0	1e-05	1e-05	0	0	1e-05	2e-05	0	0	3e-05	5e-05	4e-05	2e-05	0	2e-05	1e-05	1e-05	2e-05	0.00024	1e-05	0	0	5e-05	7e-05	5e-05	2e-05	3e-05	0.0002	0	0.00094
1952026	Lachnospiraceae bacterium UBA3287	1e-05	1e-05	1e-05	4e-05	1e-05	1e-05	2e-05	1e-05	0	1e-05	1e-05	1e-05	0	0	0	0	0	0	4e-05	1e-05	2e-05	3e-05	0	2e-05	2e-05	0	0	0	0	0	0	0	0	1e-05	2e-05	1e-05	4e-05	0	2e-05	2e-05	0	0	0	0	0	0	0	0
1952137	Lachnospiraceae bacterium UBA7110	1e-05	1e-05	1e-05	7e-05	1e-05	1e-05	1e-05	1e-05	1e-05	1e-05	1e-05	2e-05	0	0	0	0	0	0	1e-05	1e-05	1e-05	1e-05	0	2e-05	1e-05	0	0	0	0	0	0	0	0	0	1e-05	1e-05	7e-05	0	1e-05	1e-05	0	0	0	0	0	0	0	0
712991	Lachnospiraceae bacterium oral taxon 500	1e-05	4e-05	2e-05	3e-05	3e-05	2e-05	1e-05	2e-05	1e-05	5e-05	2e-05	3e-05	0	0	0	0	0	0	1e-05	3e-05	7e-05	1e-05	0	2e-05	2e-05	0	0	0	0	0	0	0	0	1e-05	1e-05	2e-05	3e-05	1e-05	0	0	0	0	0	0	0	0	0	0
1952001	Lachnospiraceae bacterium UBA2860	1e-05	1e-05	1e-05	5e-05	1e-05	1e-05	3e-05	1e-05	1e-05	1e-05	1e-05	1e-05	0	0	0	0	0	0	0	1e-05	1e-05	3e-05	0	1e-05	1e-05	0	0	0	0	0	0	0	0	0	1e-05	2e-05	4e-05	0	3e-05	3e-05	0	0	0	0	0	0	0	0
1952151	Lachnospiraceae bacterium UBA7188	0	1e-05	2e-05	0.00018	2e-05	2e-05	2e-05	1e-05	1e-05	1e-05	2e-05	2e-05	0	0	0	0	0	0	2e-05	1e-05	2e-05	1e-05	0	3e-05	2e-05	0	0	0	0	0	0	0	0	1e-05	2e-05	2e-05	0.00017	0	2e-05	1e-05	0	0	0	0	0	0	0	0
1952094	Lachnospiraceae bacterium UBA4380	1e-05	0	1e-05	2e-05	1e-05	1e-05	2e-05	1e-05	2e-05	1e-05	1e-05	1e-05	0	0	0	0	0	0	1e-05	1e-05	1e-05	2e-05	0	2e-05	2e-05	0	0	0	0	0	0	0	0	1e-05	1e-05	1e-05	2e-05	2e-05	1e-05	2e-05	0	0	0	0	0	0	0	0
1952085	Lachnospiraceae bacterium UBA4317	0	0	1e-05	4e-05	1e-05	0	1e-05	1e-05	0	0	1e-05	2e-05	0	0	0	0	0	0	3e-05	0	2e-05	3e-05	0	1e-05	1e-05	0	0	0	0	0	0	0	0	0	1e-05	1e-05	4e-05	0	2e-05	2e-05	0	0	0	0	0	0	0	0
1952071	Lachnospiraceae bacterium UBA3863	0	1e-05	1e-05	5e-05	2e-05	1e-05	3e-05	1e-05	2e-05	1e-05	1e-05	1e-05	0	0	0	0	0	0	5e-05	1e-05	2e-05	5e-05	0	2e-05	4e-05	0	0	0	0	0	0	0	0	0	2e-05	1e-05	5e-05	1e-05	3e-05	4e-05	0	0	0	0	0	0	0	0
1952033	Lachnospiraceae bacterium UBA3401	0	1e-05	3e-05	6e-05	1e-05	4e-05	1e-05	1e-05	2e-05	2e-05	4e-05	2e-05	0	0	0	0	0	0	1e-05	1e-05	2e-05	1e-05	0	2e-05	1e-05	0	0	0	0	0	2e-05	0	0	2e-05	1e-05	1e-05	6e-05	1e-05	1e-05	1e-05	0	0	0	0	0	0	0	0
1410626	Lachnospiraceae bacterium NC2004	0	1e-05	1e-05	4e-05	1e-05	1e-05	1e-05	1e-05	1e-05	1e-05	1e-05	1e-05	0	0	0	0	0	0	1e-05	1e-05	0	1e-05	0	1e-05	1e-05	0	0	0	0	0	0	0	0	2e-05	0	1e-05	3e-05	0	0	0	0	0	0	0	0	0	0	0
1200747	Lachnospiraceae bacterium G11	0	3e-05	1e-05	8e-05	1e-05	1e-05	1e-05	1e-05	1e-05	1e-05	1e-05	4e-05	0	0	0	0	0	0	1e-05	3e-05	1e-05	1e-05	0	3e-05	1e-05	0	0	3e-05	0	0	0	0	0	1e-05	1e-05	2e-05	7e-05	1e-05	0	0	0	0	0	0	0	0	0	2e-05
1952118	Lachnospiraceae bacterium UBA6987	0	1e-05	1e-05	5e-05	2e-05	1e-05	5e-05	1e-05	1e-05	1e-05	1e-05	1e-05	0	0	0	0	0	0	1e-05	0	1e-05	2e-05	0	1e-05	1e-05	0	0	0	0	0	0	0	0	0	1e-05	2e-05	6e-05	0	3e-05	3e-05	0	0	0	0	0	0	0	0
1952184	Lachnospiraceae bacterium UBA7766	0	0	1e-05	3e-05	1e-05	1e-05	2e-05	1e-05	0	0	1e-05	1e-05	0	0	0	0	0	0	0	1e-05	1e-05	1e-05	0	3e-05	1e-05	0	0	0	0	0	0	0	0	0	1e-05	3e-05	3e-05	0	1e-05	1e-05	0	0	0	0	0	0	0	0
1951970	Lachnospiraceae bacterium UBA1066	0	1e-05	1e-05	2e-05	1e-05	1e-05	2e-05	1e-05	1e-05	1e-05	1e-05	1e-05	0	0	0	0	0	0	1e-05	1e-05	1e-05	1e-05	0	1e-05	1e-05	0	0	0	0	0	0	0	0	1e-05	1e-05	1e-05	2e-05	1e-05	1e-05	1e-05	0	0	0	0	0	0	0	0
1408322	Lachnospiraceae bacterium AC3007	0	0	0	2e-05	1e-05	0	1e-05	1e-05	1e-05	0	0	0	0	0	0	0	0	0	0	1e-05	1e-05	0	0	1e-05	1e-05	2e-05	0	0	0	0	0	0	0	0	1e-05	1e-05	2e-05	0	1e-05	1e-05	0	0	3e-05	0	0	0	0	0
1951986	Lachnospiraceae bacterium UBA1760	0	2e-05	1e-05	6e-05	0	1e-05	0	1e-05	1e-05	1e-05	1e-05	1e-05	0	0	0	0	0	0	0	2e-05	1e-05	0	0	1e-05	1e-05	0	0	0	0	0	0	0	0	4e-05	0	1e-05	6e-05	0	0	0	0	0	1e-05	0	0	0	0	0
1410631	Lachnospiraceae bacterium P6B14	0	1e-05	7e-05	3e-05	2e-05	2e-05	1e-05	1e-05	2e-05	1e-05	2e-05	1e-05	0.00036	0.0004	0.00021	0.00042	0.00039	0.00028	1e-05	1e-05	1e-05	2e-05	0	2e-05	2e-05	0.00032	0.00034	0.00033	0.00091	8e-05	0.00013	0.00015	0.00028	1e-05	2e-05	1e-05	2e-05	1e-05	1e-05	0	0.00081	0.00015	0.0001	0.00117	5e-05	0.00024	0.00022	0.00033
1952040	Lachnospiraceae bacterium UBA3643	0	0	0	2e-05	1e-05	0	0	0	1e-05	0	0	1e-05	0	0	0	0	0	0	0	0	1e-05	0	0	2e-05	1e-05	0	0	0	0	0	0	0	0	0	1e-05	1e-05	1e-05	0	0	0	0	0	0	0	0	0	0	0
1410625	Lachnospiraceae bacterium MD2004	1e-05	0	0	1e-05	0	0	1e-05	1e-05	1e-05	0	0	8e-05	0	0	0	0	0	0	0	1e-05	1e-05	1e-05	0	1e-05	0	0	0	0	0	0	0	0	0	1e-05	0	1e-05	2e-05	1e-05	0	0	0	0	0	0	0	0	0	0
1952186	Lachnospiraceae bacterium UBA7777	1e-05	2e-05	4e-05	0	0	1e-05	0	0	0	0	1e-05	0	0	0	0	0	0	0	0	1e-05	0	0	0	0	0	0	0	0	0	0	0	0	0	0	0	0	0	1e-05	0	1e-05	0	0	0	0	0	0	0	0
1952083	Lachnospiraceae bacterium UBA4292	0	1e-05	0	2e-05	0	0	1e-05	1e-05	1e-05	1e-05	0	0	0	0	0	0	0	0	0	1e-05	1e-05	0	0	1e-05	0	0	0	0	0	0	0	0	0	0	0	1e-05	2e-05	1e-05	1e-05	1e-05	0	0	0	0	0	0	0	0
1952106	Lachnospiraceae bacterium UBA5899	0	1e-05	2e-05	0.00021	6e-05	1e-05	2e-05	3e-05	2e-05	1e-05	1e-05	2e-05	0	0	0	0	0	0	1e-05	1e-05	1e-05	2e-05	0	0.00017	4e-05	0	0	0	0	0	0	0	0	2e-05	2e-05	0.00115	0.0002	1e-05	1e-05	1e-05	0	0	0	0	0	0	0	0
1952051	Lachnospiraceae bacterium UBA3732	0	1e-05	1e-05	3e-05	1e-05	1e-05	1e-05	1e-05	0	0	1e-05	0	0	0	0	0	0	0	2e-05	1e-05	2e-05	2e-05	0	2e-05	1e-05	0	3e-05	0	0	0	0	0	0	0	1e-05	1e-05	3e-05	0	1e-05	1e-05	0	0	0	0	0	0	0	0
1952062	Lachnospiraceae bacterium UBA3814	0	1e-05	0	3e-05	0	0	1e-05	0	0	0	0	1e-05	0	0	0	0	0	0	1e-05	1e-05	1e-05	3e-05	0	1e-05	2e-05	0	0	0	0	0	0	0	0	0	1e-05	0	3e-05	0	0	1e-05	0	0	0	0	0	0	0	0
1952058	Lachnospiraceae bacterium UBA3795	0	1e-05	0	6e-05	1e-05	0	1e-05	1e-05	1e-05	0	0	2e-05	0	0	0	0	0	0	1e-05	1e-05	1e-05	1e-05	0	1e-05	0	0	0	0	0	0	0	0	0	1e-05	1e-05	1e-05	6e-05	0	0	0	0	0	0	0	0	0	0	0
1951974	Lachnospiraceae bacterium UBA1258	0	1e-05	0	5e-05	0	0	1e-05	1e-05	0	0	1e-05	0	0	0	0	0	0	0	0	1e-05	0	0	0	0	0	0	0	0	0	0	0	0	0	0	0	1e-05	5e-05	0	1e-05	0	0	0	0	0	0	0	0	0
1952036	Lachnospiraceae bacterium UBA3632	0	1e-05	0	6e-05	1e-05	1e-05	1e-05	1e-05	1e-05	0	1e-05	1e-05	0	0	0	0	0	0	0	1e-05	1e-05	0	0	1e-05	1e-05	0	0	0	0	0	0	0	0	1e-05	1e-05	1e-05	5e-05	0	1e-05	0	0	0	0	0	0	0	0	0
1952015	Lachnospiraceae bacterium UBA2912	0	1e-05	1e-05	3e-05	6e-05	1e-05	1e-05	1e-05	2e-05	1e-05	2e-05	1e-05	0	0	0	0	0	0	1e-05	1e-05	1e-05	1e-05	0	1e-05	1e-05	0	0	0	0	0	0	0	0	1e-05	1e-05	1e-05	3e-05	1e-05	2e-05	1e-05	0	0	0	0	0	0	0	0
1951984	Lachnospiraceae bacterium UBA1755	0	0	0	2e-05	0	0	1e-05	0	0	0	0	0	0	0	0	0	0	0	1e-05	0	1e-05	1e-05	0	1e-05	1e-05	0	0	0	0	0	0	0	0	0	0	1e-05	1e-05	0	0	0	0	0	0	0	0	0	0	0
1165092	Lachnospiraceae bacterium JC7	0	1e-05	1e-05	2e-05	1e-05	1e-05	1e-05	1e-05	1e-05	0	1e-05	1e-05	0	0	0	0	0.00523	0	2e-05	1e-05	0	0	0	1e-05	1e-05	0.00163	0	0	0.0001	0.00022	0	0	0	1e-05	1e-05	0	2e-05	0	1e-05	0	0.00021	0.00019	0	0	0	0.00014	4e-05	2e-05
1855374	Lachnospiraceae bacterium KH1T2	0	2e-05	1e-05	5e-05	1e-05	2e-05	1e-05	1e-05	2e-05	2e-05	2e-05	3e-05	0	0	0	4e-05	4e-05	0	1e-05	2e-05	2e-05	1e-05	0	4e-05	3e-05	2e-05	0	3e-05	5e-05	0	2e-05	2e-05	2e-05	4e-05	1e-05	1e-05	5e-05	1e-05	1e-05	1e-05	0	4e-05	2e-05	0	3e-05	3e-05	2e-05	6e-05
1520823	Lachnospiraceae bacterium NE2001	0	0	1e-05	2e-05	1e-05	1e-05	1e-05	0	2e-05	0	1e-05	1e-05	0	0	0	0	0	0	1e-05	0	0	1e-05	0	1e-05	0	0	0	0	0	0	0	0	0	1e-05	0	1e-05	2e-05	1e-05	0	0	0	0	0	0	0	0	0	0
1520825	Lachnospiraceae bacterium XPB1003	0	2e-05	1e-05	4e-05	1e-05	0	1e-05	1e-05	1e-05	0	1e-05	0	0	0	0	0	0	0	1e-05	1e-05	1e-05	1e-05	0	2e-05	1e-05	0	0	0	0	0	0	0	0	1e-05	1e-05	1e-05	4e-05	0	0	0	0	0	0	0	0	0	0	0
1952168	Lachnospiraceae bacterium UBA7480	0	2e-05	2e-05	0.0001	2e-05	2e-05	1e-05	1e-05	2e-05	1e-05	2e-05	1e-05	0	0	0	0	0	0	1e-05	2e-05	1e-05	1e-05	0	2e-05	1e-05	0	0	0	0	0	0	0	0	1e-05	2e-05	2e-05	0.0001	1e-05	1e-05	0	0	0	0	0	0	0	0	0
1951972	Lachnospiraceae bacterium UBA1201	0	0	1e-05	3e-05	1e-05	1e-05	1e-05	1e-05	1e-05	0	1e-05	0	0	0	0	0	0	0	1e-05	1e-05	1e-05	2e-05	0	1e-05	1e-05	0	0	0	0	0	0	0	0	0	1e-05	1e-05	3e-05	0	1e-05	2e-05	0	0	0	0	0	0	0	0
1952060	Lachnospiraceae bacterium UBA3802	0	1e-05	1e-05	3e-05	1e-05	1e-05	1e-05	1e-05	1e-05	0	1e-05	0	0	0	0	0	0	0	0	1e-05	1e-05	0	0	0	1e-05	0	0	0	0	0	0	0	0	0	1e-05	1e-05	3e-05	0	0	0	0	0	0	0	0	0	0	0
1951981	Lachnospiraceae bacterium UBA1729	0	1e-05	1e-05	8e-05	1e-05	1e-05	1e-05	1e-05	1e-05	1e-05	1e-05	2e-05	0	0	0	0	0	0	0	1e-05	1e-05	0	0	1e-05	1e-05	0	0	0	0	0	0	0	0	1e-05	1e-05	1e-05	7e-05	0	0	0	0	0	0	0	0	0	0	0
1951992	Lachnospiraceae bacterium UBA2734	0	1e-05	1e-05	3e-05	1e-05	1e-05	1e-05	1e-05	0	0	1e-05	2e-05	0	0	0	0	0	0	2e-05	1e-05	1e-05	2e-05	0	1e-05	1e-05	0	0	0	0	0	0	0	0	0	1e-05	1e-05	3e-05	0	2e-05	1e-05	0	0	0	0	0	0	0	0
1952007	Lachnospiraceae bacterium UBA2887	0	1e-05	1e-05	4e-05	1e-05	0	2e-05	1e-05	1e-05	0	1e-05	1e-05	0	0	0	0	0	0	1e-05	1e-05	1e-05	1e-05	0	1e-05	1e-05	0	0	0	0	0	0	0	0	0	1e-05	1e-05	4e-05	1e-05	2e-05	2e-05	0	0	0	0	0	0	0	0
1952119	Lachnospiraceae bacterium UBA6998	0	0	1e-05	3e-05	1e-05	1e-05	1e-05	1e-05	1e-05	0	1e-05	0	0	0	0	0	0	0	1e-05	0	1e-05	1e-05	0	1e-05	1e-05	0	0	0	0	0	0	0	0	0	1e-05	1e-05	3e-05	1e-05	1e-05	1e-05	0	0	0	0	0	0	0	0
1952113	Lachnospiraceae bacterium UBA645	0	1e-05	1e-05	3e-05	1e-05	1e-05	1e-05	1e-05	1e-05	0	1e-05	1e-05	0	0	0	0	0	0	1e-05	1e-05	2e-05	0	0	3e-05	1e-05	0	0	0	0	0	0	0	0	1e-05	1e-05	1e-05	2e-05	0	0	0	0	0	0	0	0	0	0	0
1410621	Lachnospiraceae bacterium AD3010	0	1e-05	1e-05	3e-05	1e-05	2e-05	1e-05	0	2e-05	1e-05	4e-05	1e-05	0.0004	0.00065	0.00032	0.00084	0.00053	0.00038	1e-05	1e-05	2e-05	0	0	1e-05	0	0.00021	0.0004	0.00067	0.00126	0.00038	0.00027	0.00019	0.00059	0	1e-05	1e-05	3e-05	0	1e-05	0	0.00135	0.00022	0.0003	0.00031	0.00013	0.0001	0.0005	0.00064
1408321	Lachnospiraceae bacterium AC2028	0	0	0	4e-05	1e-05	1e-05	1e-05	0	1e-05	0	1e-05	1e-05	0	0	0	0	0	0	0	0	0	0	0	2e-05	0	0	0	0	0	0	0	0	0	0	1e-05	1e-05	4e-05	0	1e-05	0	0	0	0	0	0	0	0	0
1952069	Lachnospiraceae bacterium UBA3850	0	3e-05	1e-05	3e-05	1e-05	0	1e-05	1e-05	2e-05	1e-05	0	2e-05	0	0	0	0	0	0	1e-05	2e-05	1e-05	0	0	1e-05	1e-05	0	0	0	0	0	0	0	0	1e-05	0	1e-05	3e-05	1e-05	0	0	0	0	0	0	0	0	0	0
1952090	Lachnospiraceae bacterium UBA4364	0	2e-05	0	3e-05	0	1e-05	1e-05	1e-05	0	0	1e-05	0	0	0	0	0	0	0	0	1e-05	1e-05	0	0	1e-05	1e-05	0	0	0	0	0	0	0	0	0	0	1e-05	3e-05	0	1e-05	0	0	0	0	0	0	0	0	0
1952189	Lachnospiraceae bacterium UBA7784	0	2e-05	0	1e-05	1e-05	0	0	1e-05	1e-05	0	1e-05	4e-05	0	0	0	0	0	0	0	2e-05	0	1e-05	0	1e-05	1e-05	0	0	0	0	0	0	0	0	1e-05	1e-05	0	1e-05	0	0	0	0	0	0	0	0	0	0	0
1952044	Lachnospiraceae bacterium UBA3682	0	1e-05	1e-05	5e-05	1e-05	1e-05	2e-05	1e-05	2e-05	0	1e-05	1e-05	0	0	0	0	0	0	2e-05	0	1e-05	2e-05	0	2e-05	1e-05	0	0	0	0	0	0	0	0	1e-05	1e-05	1e-05	4e-05	1e-05	1e-05	2e-05	0	0	0	0	0	0	0	0
1952124	Lachnospiraceae bacterium UBA7026	0	0	0	1e-05	1e-05	0	1e-05	1e-05	0	1e-05	0	0	0	0	0	0	0	0	2e-05	1e-05	1e-05	1e-05	0	1e-05	1e-05	0	0	0	0	0	0	0	0	0	1e-05	1e-05	1e-05	0	1e-05	1e-05	0	0	0	0	0	0	0	0
1410622	Lachnospiraceae bacterium C6A11	0	3e-05	1e-05	3e-05	1e-05	1e-05	1e-05	1e-05	1e-05	1e-05	1e-05	2e-05	0	0	0	0	0	0	1e-05	2e-05	1e-05	1e-05	0	1e-05	3e-05	0	0	0	0	0	0	0	0	3e-05	1e-05	1e-05	3e-05	1e-05	0	1e-05	0	0	0	0	0	0	0	0
1200749	Lachnospiraceae bacterium G41	0	2e-05	1e-05	4e-05	1e-05	1e-05	1e-05	1e-05	0	0	1e-05	1e-05	0	0	0	0	0	0	0	2e-05	1e-05	0	0	1e-05	0	0	0	0	0	0	0	0	0	2e-05	1e-05	1e-05	4e-05	0	0	0	0	0	0	0	0	0	0	0
1952027	Lachnospiraceae bacterium UBA3302	0	0	0	1e-05	0	0	1e-05	1e-05	1e-05	0	0	1e-05	0	0	0	0	0	0	0	0	0	1e-05	0	0	0	0	0	0	0	0	0	0	0	0	0	0	1e-05	0	2e-05	1e-05	0	0	0	0	0	0	0	0
1952191	Lachnospiraceae bacterium UBA938	0	1e-05	0	3e-05	1e-05	1e-05	1e-05	0	1e-05	1e-05	1e-05	1e-05	0	0	0	0	0	0	2e-05	1e-05	1e-05	2e-05	0	1e-05	1e-05	0	0	0	0	0	0	0	0	0	1e-05	1e-05	2e-05	0	1e-05	1e-05	0	0	0	0	0	0	0	0
1952102	Lachnospiraceae bacterium UBA5131	1e-05	0	1e-05	3e-05	0	0	1e-05	1e-05	0	0	0	1e-05	0	0	0	0	0	0	0	0	1e-05	0	0	1e-05	0	0	0	0	0	0	0	0	0	0	1e-05	1e-05	3e-05	0	2e-05	0	0	0	0	0	0	0	0	0
1952169	Lachnospiraceae bacterium UBA7481	1e-05	0	1e-05	0.00032	1e-05	1e-05	1e-05	0	1e-05	1e-05	1e-05	0	0	0	0	0	0	0	0	0	0	0	0	1e-05	1e-05	0	0	0	0	0	0	0	0	0	0.00013	8e-05	0.00012	0	1e-05	1e-05	0	0	0	0	0	0	0	0
877420	Lachnospiraceae bacterium NK4A136	0	0	1e-05	3e-05	3e-05	1e-05	0	0	1e-05	1e-05	1e-05	0	0	0	0	0	0	0	0	1e-05	0	0	0	1e-05	1e-05	0	0	0	0	0	0	0	0	1e-05	0	1e-05	3e-05	0	0	0	0	0	0	0	0	0	0	0
1952039	Lachnospiraceae bacterium UBA3641	0	0	0	2e-05	1e-05	1e-05	1e-05	0	1e-05	0	1e-05	0	0	0	0	0	0	0	0	0	1e-05	0	0	1e-05	1e-05	0	0	0	0	0	0	0	0	0	1e-05	1e-05	2e-05	1e-05	1e-05	0	0	0	0	0	0	0	0	0
1951979	Lachnospiraceae bacterium UBA1718	0	3e-05	0	4e-05	0	1e-05	0	1e-05	1e-05	0	1e-05	2e-05	0	0	0	0	0	0	0	2e-05	1e-05	0	0	1e-05	1e-05	0	0	0	0	0	0	0	0	1e-05	0	0	4e-05	0	0	0	0	0	0	0	0	0	0	0
1410630	Lachnospiraceae bacterium P6A3	0	1e-05	0	6e-05	1e-05	0	1e-05	0	0	0	0	2e-05	0	0	0	0	0	0	0	1e-05	1e-05	0	0	1e-05	1e-05	0	0	0	0	0	0	0	0	0	1e-05	1e-05	5e-05	0	1e-05	0	0	0	0	0	0	0	0	0
1952038	Lachnospiraceae bacterium UBA3638	0	0	0	3e-05	0	0	0	0	1e-05	0	1e-05	0	0	0	0	0	0	0	0	0	1e-05	0	0	1e-05	0	0	0	0	0	0	0	0	0	0	0	1e-05	3e-05	0	0	0	0	0	0	0	0	0	0	0
1951998	Lachnospiraceae bacterium UBA2826	0	1e-05	3e-05	5e-05	2e-05	4e-05	2e-05	1e-05	2e-05	5e-05	2e-05	1e-05	0	0	0	0	0	0	2e-05	1e-05	3e-05	3e-05	0	3e-05	1e-05	0	0	0	0	0	0	0	0	2e-05	2e-05	1e-05	5e-05	1e-05	3e-05	4e-05	0	0	0	0	0	0	0	0
877424	Lachnospiraceae bacterium NK4A179	0	1e-05	0	2e-05	1e-05	1e-05	1e-05	1e-05	2e-05	1e-05	1e-05	1e-05	0	0	0	0	0	0	1e-05	1e-05	1e-05	0	0	1e-05	1e-05	0	0	0	0	0	0	0	0	1e-05	0	1e-05	2e-05	1e-05	0	0	0	0	0	0	0	0	0	0
1952070	Lachnospiraceae bacterium UBA3861	0	1e-05	0	1e-05	0	0	0	0	0	1e-05	0	0	0	0	0	0	0	0	0	1e-05	0	0	0	0	0	0	0	0	0	0	0	0	0	0	0	0	1e-05	0	0	0	0	0	0	0	0	0	0	0
1952179	Lachnospiraceae bacterium UBA7749	0	0	0	3e-05	1e-05	0	1e-05	1e-05	1e-05	0	1e-05	0	0	0	0	0	0	0	1e-05	0	1e-05	1e-05	0	0	1e-05	0	0	0	0	0	0	0	0	0	0	1e-05	3e-05	0	1e-05	1e-05	0	0	0	0	0	0	0	0
1951982	Lachnospiraceae bacterium UBA1748	0	1e-05	0	5e-05	1e-05	1e-05	1e-05	1e-05	1e-05	1e-05	1e-05	0	0	0	0	0	0	0	1e-05	1e-05	0	0	0	1e-05	1e-05	0	0	0	0	0	0	0	0	0	1e-05	1e-05	5e-05	1e-05	0	0	0	0	0	0	0	0	0	0
1410627	Lachnospiraceae bacterium NC2008	0	0	0	3e-05	0	0	0	0	0	1e-05	0	1e-05	0	0	0	0	0	0	0	0	0	0	0	1e-05	1e-05	0	0	0	0	0	0	0	0	1e-05	0	0	3e-05	0	0	0	0	0	0	0	0	0	0	0
1952190	Lachnospiraceae bacterium UBA935	0	0	0	4e-05	1e-05	1e-05	0	0	1e-05	0	1e-05	0	0	0	0	0	0	0	1e-05	0	1e-05	0	0	1e-05	1e-05	0	0	0	0	0	0	0	0	0	1e-05	1e-05	4e-05	0	1e-05	0	0	0	0	0	0	0	0	0
1952108	Lachnospiraceae bacterium UBA629	0	1e-05	1e-05	2e-05	1e-05	1e-05	1e-05	2e-05	1e-05	2e-05	1e-05	1e-05	0	0	0	0	0	0	1e-05	1e-05	1e-05	1e-05	0	2e-05	1e-05	0	0	0	0	0	0	0	0	0	1e-05	1e-05	2e-05	0	1e-05	0	0	0	0	0	0	0	0	0
1952115	Lachnospiraceae bacterium UBA6453	2e-05	3e-05	3e-05	0.00012	0.00127	7e-05	1e-05	4e-05	0.00012	3e-05	9e-05	4e-05	0	0	0	0	0	0	3e-05	3e-05	8e-05	1e-05	0	0.00033	8e-05	0	0	0	0	0	0	0	0	5e-05	1e-05	5e-05	0.0001	6e-05	2e-05	1e-05	0	0	0	0	0	0	0	0
1952012	Lachnospiraceae bacterium UBA2904	0	0	1e-05	1e-05	0	1e-05	0	1e-05	0	1e-05	1e-05	1e-05	0	0	0	0	0	0	0	0	1e-05	0	0	1e-05	0	0	0	0	0	0	0	0	0	0	0	0	1e-05	0	1e-05	0	0	0	0	0	0	0	0	0
1520826	Lachnospiraceae bacterium XBB2008	0	1e-05	1e-05	6e-05	1e-05	1e-05	1e-05	1e-05	1e-05	0	1e-05	4e-05	0	0	0	0	7e-05	0	2e-05	1e-05	1e-05	2e-05	0	2e-05	2e-05	3e-05	7e-05	0	0	2e-05	0	4e-05	3e-05	1e-05	2e-05	1e-05	6e-05	1e-05	1e-05	1e-05	0	4e-05	3e-05	5e-05	0	3e-05	2e-05	4e-05
1952028	Lachnospiraceae bacterium UBA3305	0	0	0	3e-05	2e-05	0	2e-05	1e-05	0	0	0	0	0	0	0	0	0	0	1e-05	0	1e-05	1e-05	0	1e-05	1e-05	0	0	0	0	0	0	0	0	0	1e-05	0	3e-05	0	0	1e-05	0	0	0	0	0	0	0	0
1952078	Lachnospiraceae bacterium UBA4239	0	0	0	0	0	0	0	0	0	0	0	0	0	0	0	0	0	0	0	0	0	0	0	0	0	0	0	0	0	0	0	0	0	0	0	0	1e-05	0	1e-05	0	0	0	0	0	0	0	0	0
1952093	Lachnospiraceae bacterium UBA4378	0	1e-05	1e-05	3e-05	1e-05	1e-05	2e-05	1e-05	1e-05	1e-05	1e-05	1e-05	0	0	0	0	0	0	2e-05	1e-05	1e-05	2e-05	0	1e-05	1e-05	0	0	0	0	0	0	0	0	1e-05	1e-05	1e-05	3e-05	1e-05	1e-05	1e-05	0	0	0	0	0	0	0	0
1951991	Lachnospiraceae bacterium UBA2731	0	0	0	0	0	0	1e-05	0	1e-05	0	0	0	0	0	0	0	0	0	0	0	0	1e-05	0	1e-05	1e-05	0	0	0	0	0	0	0	0	0	1e-05	0	0	0	0	0	0	0	0	0	0	0	0	0
1952047	Lachnospiraceae bacterium UBA3692	0	0	1e-05	6e-05	1e-05	1e-05	3e-05	1e-05	1e-05	1e-05	0	1e-05	0	0	0	0	0	0	1e-05	1e-05	1e-05	2e-05	0	1e-05	2e-05	0	0	0	0	0	0	0	0	0	1e-05	2e-05	6e-05	1e-05	2e-05	4e-05	0	0	0	0	0	0	0	0
1952052	Lachnospiraceae bacterium UBA3762	0	1e-05	1e-05	2e-05	0	1e-05	1e-05	0	0	0	1e-05	0	0	0	0	0	0	0	0	1e-05	1e-05	0	0	1e-05	1e-05	0	0	0	0	0	0	0	0	2e-05	0	1e-05	2e-05	0	0	0	0	0	0	0	0	0	0	0
1952103	Lachnospiraceae bacterium UBA5452	0	0	0	3e-05	0	0	0	1e-05	2e-05	1e-05	0	1e-05	0	0	0	0	0	0	0	0	1e-05	0	0	0	3e-05	0	0	0	0	0	0	0	0	0	2e-05	0	3e-05	1e-05	0	0	0	0	0	0	0	0	0	0
1952073	Lachnospiraceae bacterium UBA3866	0	0	0	0	0	0	0	0	1e-05	0	0	0	0	0	0	0	0	0	1e-05	0	0	0	0	0	0	0	0	0	0	0	0	0	0	0	0	0	0	0	0	0	0	0	0	0	0	0	0	0
1952048	Lachnospiraceae bacterium UBA3701	0	0	0	2e-05	0	0	0	0	0	0	1e-05	0	0	0	0	0	0	0	0	0	0	0	0	0	0	0	0	0	0	0	0	0	0	0	1e-05	0	2e-05	0	0	0	0	0	0	0	0	0	0	0
1952014	Lachnospiraceae bacterium UBA2911	0	0	0	2e-05	1e-05	0	1e-05	0	0	0	0	0	0	0	0	0	0	0	0	0	0	1e-05	0	0	0	0	0	0	0	0	0	0	0	0	0	1e-05	3e-05	0	0	1e-05	0	0	0	0	0	0	0	0
1952111	Lachnospiraceae bacterium UBA6419	1e-05	1e-05	9e-05	0.00014	0.00071	0.0001	2e-05	8e-05	2e-05	1e-05	7e-05	0	0	0	0	0	0	0	2e-05	1e-05	6e-05	3e-05	0	0.00012	1e-05	0	0	0	0	0	0	0	0	0	1e-05	2e-05	0.00012	1e-05	0	1e-05	0	0	0	0	0	0	0	0
1952065	Lachnospiraceae bacterium UBA3826	0	0	0	2e-05	0	0	0	1e-05	0	0	0	0	0	0	0	0	0	0	0	0	0	0	0	0	0	0	0	0	0	0	0	0	0	0	0	0	2e-05	0	0	0	0	0	0	0	0	0	0	0
1952049	Lachnospiraceae bacterium UBA3711	0	0	0	2e-05	1e-05	0	1e-05	1e-05	1e-05	0	0	1e-05	0	0	0	0	0	0	0	0	0	1e-05	0	1e-05	1e-05	0	0	0	0	0	0	0	0	1e-05	1e-05	1e-05	2e-05	1e-05	1e-05	1e-05	0	0	0	0	0	0	0	0
1952149	Lachnospiraceae bacterium UBA7179	0	0	1e-05	6e-05	1e-05	1e-05	0	2e-05	0	1e-05	1e-05	0	0	0	0	0	0	0	1e-05	1e-05	0	0	0	0	1e-05	0	0	0	0	0	0	0	0	1e-05	1e-05	1e-05	5e-05	0	0	0	0	0	0	0	0	0	0	0
1952008	Lachnospiraceae bacterium UBA2888	0	0	0	0	0	0	0	0	0	0	0	0	0	0	0	0	0	0	0	0	0	0	0	0	0	0	0	0	0	0	0	0	0	0	0	0	0	0	0	0	0	0	0	0	0	0	0	0
1951988	Lachnospiraceae bacterium UBA1778	0	0	0	2e-05	1e-05	0	1e-05	0	1e-05	0	0	1e-05	0	0	0	0	0	0	0	0	0	1e-05	0	1e-05	0	0	0	0	0	0	0	0	0	0	0	1e-05	2e-05	0	0	1e-05	0	0	0	0	0	0	0	0
1392494	Lachnospiraceae bacterium AC2012	0	0	1e-05	1e-05	1e-05	1e-05	0	0	1e-05	5e-05	1e-05	4e-05	0	0	0	0	0	0	1e-05	1e-05	0	0	0	0	1e-05	0	0	0	0	0	0	0	0	0	0	1e-05	1e-05	0	0	0	0	0	0	0	0	0	0	0
1952003	Lachnospiraceae bacterium UBA2868	0	0	0	2e-05	1e-05	0	0	0	1e-05	0	0	0	0	0	0	0	0	0	1e-05	0	0	0	0	0	0	0	0	0	0	0	0	0	0	1e-05	1e-05	0	2e-05	0	1e-05	0	0	0	0	0	0	0	0	0
1952121	Lachnospiraceae bacterium UBA7015	0	0	0	5e-05	0	2e-05	0	0	2e-05	0	3e-05	1e-05	0	0	0	0	0	0	0	0	1e-05	0	0	1e-05	0	0	0	0	0	0	0	0	0	0	1e-05	1e-05	5e-05	0	1e-05	0	0	0	0	0	0	0	0	0
1952010	Lachnospiraceae bacterium UBA2896	0	0	0	1e-05	0	0	0	0	0	0	0	1e-05	0	0	0	0	0	0	0	0	0	1e-05	0	0	0	0	0	0	0	0	0	0	0	0	0	0	1e-05	0	0	1e-05	0	0	0	0	0	0	0	0
1952055	Lachnospiraceae bacterium UBA3774	0	0	0	2e-05	0	0	1e-05	0	0	0	0	0	0	0	0	0	0	0	0	0	0	0	0	0	0	0	0	0	0	0	0	0	0	0	0	0	2e-05	0	1e-05	0	0	0	0	0	0	0	0	0
1952084	Lachnospiraceae bacterium UBA4316	0	1e-05	0	3e-05	0	0	0	0	0	0	0	1e-05	0	0	0	0	0	0	0	1e-05	0	0	0	0	0	0	0	0	0	0	0	0	0	0	0	0	3e-05	0	0	0	0	0	0	0	0	0	0	0
1952016	Lachnospiraceae bacterium UBA2932	0	0	0	6e-05	0	0	0	0	0	0	0	0	0	0	0	0	0	0	0	0	0	0	0	1e-05	0	0	0	0	0	0	0	0	0	0	0	0	6e-05	0	0	0	0	0	0	0	0	0	0	0
1952101	Lachnospiraceae bacterium UBA4957	0	0	0	0	0	0	0	0	0	0	0	0	0	0	0	0	0	0	0	0	0	0	0	0	0	0	0	0	0	0	0	0	0	0	0	0	0	0	0	0	0	0	0	0	0	0	0	0
1952100	Lachnospiraceae bacterium UBA4920	0	0	2e-05	3e-05	0	2e-05	1e-05	0	0	0	2e-05	0	0	0	0	0	0	0	0	0	0	0	0	4e-05	0	0	0	0	0	0	0	0	0	1e-05	0	0	3e-05	0	1e-05	0	0	0	0	0	0	0	0	0
1952037	Lachnospiraceae bacterium UBA3633	0	0	0	0	0	0	0	0	0	0	0	0	0	0	0	0	0	0	0	0	0	0	0	0	0	0	0	0	0	0	0	0	0	0	0	0	0	0	0	0	0	0	0	0	0	0	0	0
1958817	Lachnospiraceae bacterium Phil5	0	0	1e-05	1e-05	0	0	0	0	0	0	0	0	0	0	0	0	0	0	0	0	0	1e-05	0	0	0	0	0	0	0	0	0	0	0	0	0	1e-05	2e-05	0	0	0	0	0	0	0	0	0	0	0
1952057	Lachnospiraceae bacterium UBA3785	0	0	0	1e-05	1e-05	0	1e-05	0	0	0	0	0	0	2e-05	0	0	0	0	1e-05	0	0	1e-05	0	0	1e-05	0	0	0	0	0	0	0	0	0	0	1e-05	1e-05	0	2e-05	1e-05	0	0	0	0	0	0	0	0
410072	Coprococcus comes	0.00709	0.00506	0.00172	0.00256	0.00441	0.00578	0.00214	0.00065	0.00232	0.00467	0.00553	0.00344	0.00253	0	0.00152	0.00097	0.00461	0.0003	0.00075	0.01061	0.00045	0.00258	0	0.00476	0.00252	0.00214	0.00376	0.00019	0.00034	0.00074	0	0.00047	0.00228	0.00267	0.0069	0.00243	0.00117	0.00197	0.00015	0.00057	0.00063	0.00318	0.00162	0.00143	6e-05	0.00111	0.00232	0.00028
116085	Coprococcus catus	0.0008	0.00121	0.00051	0.00042	0.00099	0.00087	0.00052	0.0005	0.00027	0.00092	0.00092	0.00049	0	0	0	0	0	0	0.00013	0.00096	0.00039	0.0004	0	0.00095	0.00033	0	0	0	0	0	0	0	0	0.00012	0.0004	0.00073	0.00041	0.00018	8e-05	0.00014	0	0	0	0	9e-05	0	0	0
33043	Coprococcus eutactus	0.00033	0.00071	0.00049	0.00138	0.00069	0.00063	0.00283	0.00022	0.00058	0.00027	0.00038	0.01232	0.00012	0	0.00012	8e-05	0.00075	0.00018	0.00037	0.00067	0.00028	0.02629	0.02304	0.00146	0.00053	0.02023	8e-05	0.00064	0.00013	5e-05	0.00132	0.00014	0	0.00055	0.00049	0.00109	0.00229	0.00039	0.00011	0.00014	0.00103	5e-05	0.01376	6e-05	6e-05	0.00233	0.0001	0.00057
458253	uncultured Coprococcus sp.	6e-05	6e-05	6e-05	0.00022	0.00011	0.00011	0.00061	6e-05	0.00014	5e-05	0.00015	4e-05	0	0	0	0	7e-05	0	9e-05	7e-05	9e-05	6e-05	0	0.00136	8e-05	0.0003	0	0	9e-05	0	0	0	0	4e-05	7e-05	0.00163	0.00037	8e-05	1e-05	0.00051	0	0	0	0	0	0.00631	0.00011	0
1263071	Coprococcus eutactus CAG:665	6e-05	4e-05	2e-05	4e-05	1e-05	2e-05	0.00164	8e-05	1e-05	0	1e-05	0.00013	0	0	0	0	0	0	0	5e-05	6e-05	0.00023	0	0.00024	1e-05	0	0	0	0	0	0	0	0	0	1e-05	0.00034	6e-05	0	0	0	0	0	0	0	0	0	0	0
1262863	Coprococcus sp. CAG:782	2e-05	3e-05	2e-05	0.00026	7e-05	1e-05	1e-05	1e-05	2e-05	1e-05	2e-05	1e-05	0	0	0	0	0	0	1e-05	3e-05	1e-05	1e-05	0	0.00048	3e-05	0	0	0	0	0	0	0	0	0	1e-05	3e-05	6e-05	1e-05	1e-05	0	0	0	0	0	0	0	0	0
1078091	Coprococcus sp. HPP0048	4e-05	5e-05	2e-05	2e-05	6e-05	6e-05	1e-05	7e-05	8e-05	2e-05	9e-05	3e-05	0	0	0	0	0	0	2e-05	6e-05	7e-05	5e-05	0	5e-05	0.00038	2e-05	0	0	0	0	0	0	0	0.00017	0.00011	0.00012	2e-05	4e-05	3e-05	2e-05	0	0	0	0	0	0	0	0
649756	Anaerostipes hadrus	0.00849	0.00237	0.00171	0.00048	0.00427	0.00321	0.00023	0.00257	0.00964	0.00033	0.00484	0.00031	0.00584	0.00539	0.00107	0.00368	0.00297	0.00255	0.00085	0.00567	0.00109	0.00044	0	0.00062	0.00173	0.00108	0.00213	0.00573	0.01039	0.00154	0.01025	0.00105	0.00374	0.00159	0.00205	0.00126	0.00077	0.00503	0.00215	0.00012	0.01904	0.00191	0.00913	0.00192	0.00421	0.00251	0.00241	0.01285
1261637	Anaerostipes sp. 992a	4e-05	4e-05	4e-05	7e-05	9e-05	4e-05	3e-05	2e-05	7e-05	2e-05	4e-05	5e-05	0.00018	0.00035	0.00016	0.00013	0	0.0002	3e-05	7e-05	5e-05	3e-05	0	5e-05	9e-05	3e-05	0.00011	0.0007	0.00755	0.00011	2e-05	5e-05	0.00037	4e-05	3e-05	3e-05	6e-05	3e-05	2e-05	1e-05	0.00521	4e-05	0.00038	2e-05	0.00042	0.00038	0.00018	0.00074
1261636	Anaerostipes sp. 494a	4e-05	3e-05	3e-05	8e-05	4e-05	3e-05	2e-05	3e-05	5e-05	2e-05	5e-05	1e-05	5e-05	0.0001	2e-05	5e-05	0	7e-05	1e-05	5e-05	2e-05	1e-05	0	1e-05	3e-05	0.00014	5e-05	0.0003	0.00011	0	2e-05	0	0.0001	1e-05	2e-05	2e-05	7e-05	3e-05	2e-05	0	0.00062	4e-05	0	5e-05	0.00055	0	0	0.00014
105841	Anaerostipes caccae	2e-05	2e-05	3e-05	5e-05	2e-05	6e-05	1e-05	4e-05	5e-05	1e-05	5e-05	1e-05	0.00179	0.01029	0.00026	0.00227	0.01075	0.00544	1e-05	3e-05	4e-05	1e-05	0	3e-05	4e-05	0.00394	0.0084	0.01093	0.02069	0.0007	0.00698	0.00046	0.00074	5e-05	4e-05	2e-05	5e-05	2e-05	0.00016	1e-05	0.03245	0.00397	0.00681	0.00632	0.00676	0.00555	0.00819	0.00698
360807	Roseburia inulinivorans	0.00159	0.00431	0.02138	0.00214	0.00135	0.0253	0.00939	0.00542	0.01058	0.01426	0.00961	0.01924	0.00102	0.00121	0.0004	0.00066	0.00245	0.00075	0.0019	0.00869	0.00355	0.00166	0.02296	0.00429	0.00324	0.00238	0.0018	0	0	0.00137	8e-05	0.00071	0.00424	0.00455	0.00216	0.00176	0.00611	0.00181	0.00035	0.0009	0	0.00124	0.00065	0.00197	0.00013	0.00097	0.00437	0
166486	Roseburia intestinalis	0.00094	0.0027	0.04319	0.00166	0.00087	0.05832	0.00121	0.00106	0.0034	0.03814	0.04619	0.00609	0.01702	0.00756	0.0052	0.00092	0.00209	0.00703	0.0018	0.0039	0.00248	0.00111	0	0.00451	0.01651	0.00057	0.00209	0	0	0.00666	0	0.01389	0.00491	0.00154	0.00172	0.00144	0.00158	0.00354	0.00013	0.00099	0.00077	0.02267	9e-05	0.0163	2e-05	0.00148	0	0
512314	uncultured Roseburia sp.	0.00041	0.00044	0.00081	0.0005	0.0016	0.00222	0.00045	0.00023	0.00048	0.00096	0.00052	0.00064	5e-05	0.00087	2e-05	0	0.0003	0.0002	0.00037	0.00057	0.00056	0.00024	0	0.00023	0.00074	0.0044	0.00104	0.00055	0.00019	0	0.00011	2e-05	0.00012	0.00049	0.00461	0.00135	0.00061	0.00032	0.00019	0.00037	0	0.00024	0.00046	0.00011	0.00033	0	0.00048	0.00293
1262948	Roseburia sp. CAG:471	7e-05	5e-05	0.00071	0.00057	0.00039	0.00249	0.00033	5e-05	0.00071	0.00069	0.00969	0.00012	0	0	0	0	4e-05	0	7e-05	7e-05	0.00046	0.00025	0	0.00232	0.00218	0	0	0	0	0	0	0	0	3e-05	0.0017	0.00038	0.00029	0.00019	3e-05	0.00039	0	0	0	0	0	0	0	0
1262944	Roseburia sp. CAG:303	2e-05	1e-05	4e-05	0.00026	3e-05	4e-05	2e-05	6e-05	4e-05	2e-05	4e-05	1e-05	0	0	0	0	0	0	2e-05	3e-05	3e-05	2e-05	0	5e-05	5e-05	0	0	0	0	0	0	0	0	1e-05	3e-05	4e-05	0.00024	3e-05	1e-05	1e-05	0	0	0	0	0	0	0	0
1262942	Roseburia sp. CAG:182	2e-05	2e-05	6e-05	0.00047	0.00091	7e-05	3e-05	3e-05	7e-05	5e-05	4e-05	3e-05	0	0	0	0	0	0	4e-05	3e-05	4e-05	2e-05	0	5e-05	0.00124	0	0	0	0	0	0	0	0	0.00013	3e-05	0.00625	0.0001	5e-05	3e-05	1e-05	0	0	0	0	0	0	0	0
1262943	Roseburia sp. CAG:197	2e-05	5e-05	0.00403	0.00015	8e-05	0.00032	6e-05	4e-05	0.00014	0.00025	0.00246	0.0001	0	0	0	0	0	0	8e-05	5e-05	0.00014	3e-05	0	0.00023	0.00407	0	0	0	0	0	0	0	0	5e-05	0.00012	0.0077	0.00016	7e-05	1e-05	0.00646	0	0	0	0	0	0	0	0
1262946	Roseburia sp. CAG:380	2e-05	4e-05	0.00012	0.00079	4e-05	4e-05	1e-05	2e-05	3e-05	1e-05	4e-05	2e-05	0	0	0	0	0	0	3e-05	4e-05	1e-05	2e-05	0	7e-05	1e-05	0	0	0	0	0	0	0	0	3e-05	1e-05	8e-05	0.00032	3e-05	1e-05	1e-05	0	0	0	0	0	0	0	0
1262945	Roseburia sp. CAG:309	2e-05	0.0002	0.00019	9e-05	3e-05	9e-05	1e-05	2e-05	3e-05	1e-05	4e-05	0.0001	0	0	0	0	0	0	2e-05	0.00015	1e-05	0.0003	0	2e-05	3e-05	0	0	0	0	0	0	0	0	0	2e-05	0.00025	7e-05	2e-05	3e-05	1e-05	0	0	0	0	0	0	0	0
301302	Roseburia faecis	0.00051	0.00385	0.07822	0.00734	0.01487	0.10597	0.00949	0.00097	0.027	0.10168	0.05807	0.00214	0.01249	0.00764	0.00791	0	0.00069	0.01959	0.011	0.00405	0.01966	0.0007	0	0.05088	0.00386	0.00418	0.00639	0	0	0.02116	0	0.03728	0.01155	0.00313	0.02918	0.00292	0.01374	0.00785	4e-05	0.02102	0	0.03514	0.00033	0.01095	0.00032	0.0045	0.00837	0.01949
1897016	Roseburia sp. CAG:10041_57	0.00041	0.00029	0.00026	0.00142	0.00016	0.00023	0.00016	0.00011	0.00019	0.00015	0.00032	0.00023	0	0	0	0	0	0	0.00013	0.00034	8e-05	9e-05	0	0.00015	0.00028	0	0	0	0	0	0	0	0	0.00012	0.00019	0.00342	0.00055	0.00011	4e-05	7e-05	0	0	0	0	0	0	0	0
301301	Roseburia hominis	0.00025	0.00039	0.00069	0.00068	0.00536	0.00096	0.00087	0.00116	0.00063	0.00137	0.00041	0.00171	0.00025	0	8e-05	0	0	0.00042	0.00036	0.00123	0.00074	0.00178	0	0.00217	0.00079	0.00017	0	0	0.00143	0	0.00018	0.00042	0.0004	0.00129	0.00496	0.00383	0.00042	0.00027	6e-05	0.00023	0	0.0002	4e-05	0.00034	0	5e-05	0.0019	9e-05
1261634	Roseburia sp. 499	0.00012	0.00027	0.00028	0.00014	7e-05	0.00027	3e-05	0.00019	0.00013	0.0001	0.00017	0.00014	0	0	0	0	0	0	0.00011	0.00026	0.00013	4e-05	0	0.00016	7e-05	0.00014	0	0	0	0	0	0	0	0.00011	0.00011	0.0001	0.00012	9e-05	1e-05	4e-05	0	0	0	0	0	0	0	0
1261635	Roseburia sp. 831b	0.0001	0.00025	0.00028	0.0002	0.00011	0.00024	5e-05	0.00041	0.0004	0.00033	0.00022	0.00067	0	0	2e-05	0	0	0	0.00031	0.00022	0.00011	0.00014	0	0.00014	0.00031	0	0	0	0	0.00029	0	0	6e-05	0.0001	7e-05	0.00021	0.00016	0.00027	2e-05	7e-05	0	0	1e-05	0	0	0.00015	9e-05	0
208479	[Clostridium] bolteae	0.0006	0.00063	0.00011	0.0002	0.00046	0.00012	0.00017	0.00011	0.00016	0.00021	8e-05	0.00038	0.00026	0.00043	0.00016	0.00031	0.00101	0.00039	4e-05	0.00064	0.00036	0.00041	0	0.00021	0.00142	5e-05	6e-05	0.001	0.00136	0.00016	0.00024	9e-05	0.0002	0.0003	0.00055	0.00065	0.00017	4e-05	0.00167	8e-05	0.00064	0.00024	0.00025	0.00045	0.00023	0.00011	0.00012	0.00046
84030	[Clostridium] saccharolyticum	0.00054	0.0005	7e-05	0.00025	0.00024	9e-05	0.0001	0.00016	0.00028	9e-05	0.00015	5e-05	0	0	0	0	0	0	0.00012	0.00044	0.00015	0.0001	0	0.00019	0.00078	4e-05	0	0	0	0	0	0	0	5e-05	0.00015	0.00014	0.00021	8e-05	0.00036	6e-05	0	0	0	0	4e-05	0	0	0
1531	[Clostridium] clostridioforme	0.00035	0.00032	0.00026	0.00023	0.00027	0.00023	0.00016	0.00018	0.00054	0.00033	0.00024	0.00029	0	0	0	0	0	0	0.00031	0.00038	0.00031	0.00036	0	0.00024	0.00077	0	0	0	0	0	0	0	0	0.00074	0.00058	0.00035	0.00018	0.00014	0.00094	0.00012	0	0	0	0	0	0	0	0
1512	[Clostridium] symbiosum	0.00027	0.00033	9e-05	8e-05	0.00024	0.00013	0.00022	0.00017	0.00022	0.00019	0.00015	0.00018	0.02622	0.04461	0.01203	0.04586	0.01803	0.01936	0.00041	0.00028	0.00013	0.00012	0	9e-05	0.00042	0.00211	0.00834	0.06438	0.07309	0.0157	0.02427	0.01291	0.02206	8e-05	0.00034	0.00049	9e-05	6e-05	0.00052	0.0002	0.03777	0.01493	0.02971	0.0125	0.00055	0.0035	0.00339	0.00269
1834196	Lachnoclostridium sp. YL32	0.00025	0.00018	9e-05	0.00014	9e-05	7e-05	6e-05	6e-05	0.0001	4e-05	7e-05	3e-05	0.00327	0.00202	0.00243	0.00085	0.00159	0.00228	6e-05	0.00024	0.0001	8e-05	0.02303	6e-05	0.00032	0.00114	0.00153	0.00125	0.00137	0.00806	0.00453	0.00083	0.00239	0.00079	0.00017	8e-05	0.0001	5e-05	0.00013	2e-05	0	0.00092	0.01532	0.00386	0.01526	0.00347	0.00174	0.0029
342942	[Clostridium] glycyrrhizinilyticum	0.00021	0.00017	0.00011	0.00011	0.0002	0.00018	8e-05	0.00051	0.00057	0.00023	0.00019	0.00042	0	0	0	0	0	0	0.00018	0.00022	0.00026	0.00041	0	0.00026	0.00042	0	0	0	0	0	0	0	0	0.00018	0.00012	0.00018	0.00011	0.00024	7e-05	0.00011	0	0	0	0	0	0	0	0
1926283	Lachnoclostridium edouardi	8e-05	8e-05	4e-05	8e-05	7e-05	5e-05	0.00011	5e-05	6e-05	0.00012	5e-05	3e-05	0	0	0	0	0	0	2e-05	0.0001	9e-05	4e-05	0	6e-05	0.00014	0	0	0	0	0	0	0	0	2e-05	0.00014	6e-05	9e-05	2e-05	8e-05	2e-05	0	0	0	0	0	0	0	3e-05
29347	[Clostridium] scindens	0.00019	0.00028	9e-05	0.00018	0.00012	0.0001	0.00019	0.00012	0.00026	0.00017	0.00011	9e-05	0.00064	0.00173	0.00067	0.00048	0.00206	0.00086	5e-05	0.00034	0.00032	0.00022	0	8e-05	0.00038	0.00056	0.00156	0.00189	0.0035	0.00026	0.00119	0.00033	0.00079	0.00038	0.0002	0.00019	0.00023	6e-05	0.00739	9e-05	0.00315	0.00084	0.00092	0.00093	0.00079	0.00083	0.00182	0.00186
1965583	Lachnoclostridium sp. An196	5e-05	3e-05	7e-05	8e-05	0.00019	5e-05	6e-05	6e-05	4e-05	0.00047	3e-05	2e-05	0.00032	0.00065	0.00016	0.00044	0.00124	0.00058	2e-05	5e-05	9e-05	3e-05	0	8e-05	4e-05	0.00014	0.00135	0.00217	0.00208	0.00013	0.00037	0.00038	0.00045	1e-05	0.00011	8e-05	9e-05	1e-05	8e-05	3e-05	0.00104	0.00023	0.00043	0.00049	0.00021	0.00033	0.00031	0.00294
1965562	Lachnoclostridium sp. An14	5e-05	5e-05	5e-05	0.00012	0.00025	5e-05	9e-05	6e-05	5e-05	6e-05	5e-05	4e-05	0.00014	5e-05	5e-05	0.00015	0.00084	0.0003	6e-05	6e-05	0.00011	7e-05	0	5e-05	0.00023	0.0001	0.00012	0.00059	0.00045	7e-05	0.00019	0.00016	0.00014	2e-05	0.00026	7e-05	0.00012	2e-05	0.00044	7e-05	0.00049	0.00024	0.00026	0.00016	2e-05	4e-05	0.00019	0.00106
460384	[Clostridium] lavalense	4e-05	4e-05	5e-05	7e-05	0.00013	4e-05	7e-05	9e-05	4e-05	4e-05	2e-05	3e-05	0	0	0	0	0	0	6e-05	4e-05	3e-05	6e-05	0	4e-05	0.00011	0	0	0	0	2e-05	0	0	0	0.00023	4e-05	0.00065	7e-05	1e-05	0.0001	3e-05	0	0	0	0	0	0	0	0
1871021	Lachnoclostridium phocaeense	5e-05	6e-05	9e-05	0.00011	0.00013	0.0001	8e-05	8e-05	0.00013	7e-05	0.0001	0.00012	0	0	0	0	0	0	7e-05	6e-05	0.00034	0.00016	0	0.00011	0.00029	0	0	0	0	0	0	0	0	5e-05	0.00011	6e-05	0.00014	4e-05	0.00027	8e-05	0	0	0	0	0	0	0	0
1965627	Lachnoclostridium sp. An298	3e-05	2e-05	2e-05	4e-05	4e-05	3e-05	3e-05	0.00019	0.00035	4e-05	3e-05	4e-05	0	7e-05	4e-05	0	0	0	5e-05	3e-05	0.00026	6e-05	0	6e-05	6e-05	0.0002	0	0	0	0	0	0	0	3e-05	5e-05	5e-05	4e-05	4e-05	8e-05	2e-05	0	0	0	5e-05	0.00012	0	2e-05	0
1946696	Lachnoclostridium sp. UBA6475	3e-05	3e-05	0.00034	0.00013	0.0001	8e-05	3e-05	1e-05	4e-05	5e-05	7e-05	4e-05	0	0	0	0	0	0	1e-05	4e-05	3e-05	0.00011	0	4e-05	3e-05	0	0	0	0	0	0	4e-05	0	3e-05	5e-05	0.00073	0.00011	2e-05	5e-05	2e-05	0	0	0	0	0	0	0	0
358743	[Clostridium] citroniae	7e-05	7e-05	6e-05	2e-05	7e-05	0.0001	2e-05	2e-05	6e-05	4e-05	5e-05	4e-05	0	0	0	0.00016	0	0	5e-05	0.0001	3e-05	5e-05	0	2e-05	0.00017	0	0	0	0	0	0	0	0	5e-05	0.00014	4e-05	8e-05	2e-05	0.00012	1e-05	0	0	0	0	0	0	0	0
1965654	Lachnoclostridium sp. An76	3e-05	2e-05	3e-05	6e-05	4e-05	3e-05	3e-05	6e-05	0.0001	2e-05	4e-05	2e-05	0.00031	0.00037	0.00069	0.00117	0.00085	0.00105	2e-05	4e-05	0.00032	3e-05	0	7e-05	3e-05	0.00034	0.00064	0	0	2e-05	0	0.00135	0.00024	1e-05	6e-05	3e-05	5e-05	2e-05	0.00019	1e-05	0	0.00031	0.00014	8e-05	0.00066	0.00015	0.00015	0
1965560	Lachnoclostridium sp. An138	3e-05	3e-05	7e-05	0.00011	0.00014	7e-05	8e-05	8e-05	6e-05	0.0001	7e-05	0.00014	0	0	4e-05	0	0	0	3e-05	4e-05	0.00046	0.0003	0	0.0001	0.00012	2e-05	0	0	0	2e-05	0	0	0	4e-05	0.00013	0.00011	0.0001	1e-05	0.00155	4e-05	7e-05	4e-05	0	0	0	0	0	0
1965569	Lachnoclostridium sp. An169	3e-05	3e-05	6e-05	0.00015	5e-05	0.00012	7e-05	8e-05	7e-05	7e-05	9e-05	2e-05	0.00116	0.00054	0.00058	0.00246	0.00115	0.00082	5e-05	4e-05	0.00029	5e-05	0	0.0001	0.0001	0.00051	0.00176	0.0032	0.00428	0.00016	0.0007	0.0005	0.00088	2e-05	9e-05	8e-05	0.00013	2e-05	0.00017	3e-05	0.00141	0.00016	0.00051	0.00111	0	0.00052	0.00049	0.00244
1946707	Lachnoclostridium sp. UBA739	3e-05	2e-05	3e-05	8e-05	3e-05	3e-05	1e-05	1e-05	1e-05	1e-05	4e-05	1e-05	0	0	0	0	0	0	0	4e-05	1e-05	1e-05	0	1e-05	2e-05	0	0	0	0	0	0	0	0	0	2e-05	2e-05	7e-05	1e-05	1e-05	0	0	0	0	0	0	0	0	0
1946695	Lachnoclostridium sp. UBA5890	3e-05	3e-05	0.00019	8e-05	4e-05	0.00011	2e-05	1e-05	4e-05	3e-05	6e-05	0.00021	0	0	0	0	0	0	2e-05	4e-05	2e-05	0.00049	0	3e-05	6e-05	0	0	0	0	0	0	0	0	4e-05	4e-05	0.00017	6e-05	2e-05	2e-05	1e-05	0	0	0	0	0	0	0	0
1946687	Lachnoclostridium sp. UBA2905	2e-05	2e-05	6e-05	0.00031	4e-05	9e-05	1e-05	8e-05	7e-05	2e-05	6e-05	0.0004	0	0	0	0	0	0	4e-05	3e-05	2e-05	0.00049	0	4e-05	0.00017	0	0	0	0	0	0	0	0	0.00012	4e-05	0.00057	0.00013	5e-05	1e-05	8e-05	0	0	0	0	0	0	0	0
1526	[Clostridium] aminophilum	2e-05	2e-05	2e-05	8e-05	2e-05	2e-05	3e-05	2e-05	3e-05	5e-05	2e-05	2e-05	0	0	0	0	0	0	3e-05	3e-05	2e-05	3e-05	0	3e-05	4e-05	0	0	0	0	0	0	0	0	1e-05	2e-05	2e-05	8e-05	1e-05	2e-05	2e-05	0	0	0	0	0	0	0	0
253257	[Clostridium] amygdalinum	2e-05	2e-05	1e-05	5e-05	2e-05	2e-05	5e-05	1e-05	6e-05	1e-05	2e-05	3e-05	0	0	0	0	0	0	2e-05	3e-05	2e-05	1e-05	0	1e-05	5e-05	0	0	0	0	0	0	0	0	1e-05	2e-05	2e-05	4e-05	2e-05	2e-05	0	0	0	0	0	0	0	0	0
37658	[Clostridium] populeti	2e-05	1e-05	1e-05	8e-05	1e-05	1e-05	1e-05	0	1e-05	0	1e-05	1e-05	0	0	0	0	0	0	1e-05	2e-05	1e-05	0	0	1e-05	1e-05	0	0	0	0	0	0	0	0	0	0	1e-05	8e-05	1e-05	1e-05	0	0	0	0	0	0	0	0	0
1965555	Lachnoclostridium sp. An131	2e-05	2e-05	4e-05	9e-05	5e-05	4e-05	4e-05	3e-05	3e-05	6e-05	3e-05	3e-05	0	0	2e-05	0	0	3e-05	4e-05	3e-05	0.00018	4e-05	0	9e-05	4e-05	2e-05	8e-05	6e-05	0	0	0	0	0	5e-05	7e-05	0.00021	9e-05	1e-05	0.00017	3e-05	0	0	0	2e-05	0.0001	0	0	0.00165
1965547	Lachnoclostridium sp. An118	2e-05	2e-05	3e-05	5e-05	7e-05	4e-05	3e-05	3e-05	5e-05	2e-05	4e-05	4e-05	0	0	0	0	0	0	2e-05	2e-05	0.00043	5e-05	0	3e-05	0.00012	0	0	0	0	0	0	0	0	2e-05	4e-05	4e-05	5e-05	3e-05	0.00011	2e-05	0	0	0	0	0	0	0	0
1965575	Lachnoclostridium sp. An181	2e-05	1e-05	1e-05	5e-05	3e-05	1e-05	1e-05	6e-05	2e-05	2e-05	2e-05	2e-05	0	0	0	0	0	0	2e-05	2e-05	0.0001	1e-05	0	2e-05	0.00026	0	0	0	0	0	0	0	0	9e-05	2e-05	2e-05	4e-05	1e-05	5e-05	1e-05	0	0	0	0	0	0	0	0
89153	[Clostridium] hylemonae	1e-05	2e-05	1e-05	2e-05	2e-05	1e-05	1e-05	1e-05	1e-05	2e-05	1e-05	1e-05	0	0	0	0	0	0	0	2e-05	0.00013	1e-05	0	2e-05	4e-05	0	0	0	0	0	0	0	0	0	1e-05	1e-05	2e-05	1e-05	7e-05	1e-05	0	0	0	0	0	0	0	0
66219	Lachnoclostridium phytofermentans	1e-05	1e-05	1e-05	0.00012	1e-05	1e-05	1e-05	1e-05	1e-05	2e-05	1e-05	1e-05	0	0	0	0	0	0	0	1e-05	2e-05	1e-05	0	2e-05	1e-05	0	0	0	0	0	0	0	0	1e-05	1e-05	2e-05	0.00011	1e-05	1e-05	0	0	0	0	0	0	0	0	2e-05
1946690	Lachnoclostridium sp. UBA3320	1e-05	1e-05	1e-05	5e-05	2e-05	1e-05	1e-05	1e-05	2e-05	1e-05	1e-05	0	0	0	0	0	0	0	1e-05	1e-05	1e-05	0	0	1e-05	1e-05	0	0	0	0	0	0	0	0	2e-05	1e-05	1e-05	5e-05	1e-05	1e-05	0	0	0	0	0	0	0	0	0
1946689	Lachnoclostridium sp. UBA3262	1e-05	1e-05	2e-05	4e-05	1e-05	1e-05	1e-05	1e-05	1e-05	1e-05	1e-05	1e-05	0	0	0	0	0	0	1e-05	1e-05	1e-05	0	0	1e-05	5e-05	0	0	0	0	0	0	0	0	1e-05	0	1e-05	3e-05	1e-05	1e-05	0	0	0	0	0	0	0	0	0
29364	[Clostridium] polysaccharolyticum	1e-05	0	1e-05	5e-05	1e-05	1e-05	1e-05	1e-05	1e-05	1e-05	1e-05	0	0	0	0	0	0	0	1e-05	1e-05	1e-05	0	0	1e-05	1e-05	0	0	0	0	0	0	0	0	0	1e-05	1e-05	5e-05	1e-05	1e-05	0	0	0	0	0	0	0	0.0001	0
1946694	Lachnoclostridium sp. UBA5725	1e-05	1e-05	1e-05	4e-05	1e-05	1e-05	0	1e-05	1e-05	0	1e-05	1e-05	0	0	0	0	0	0	1e-05	1e-05	1e-05	0	0	1e-05	0	0	0	0	0	0	0	0	0	0	0	1e-05	4e-05	1e-05	1e-05	0	0	0	0	0	0	0	0	0
1946705	Lachnoclostridium sp. UBA7215	1e-05	1e-05	2e-05	2e-05	1e-05	1e-05	1e-05	1e-05	1e-05	1e-05	1e-05	1e-05	0	0	0	0	0	3e-05	2e-05	1e-05	2e-05	2e-05	0	2e-05	1e-05	0	0	0	0	0	0	0	0	0	1e-05	1e-05	1e-05	1e-05	1e-05	1e-05	0	0	0	2e-05	0	0	0	0
1946699	Lachnoclostridium sp. UBA7097	1e-05	1e-05	1e-05	5e-05	1e-05	1e-05	1e-05	1e-05	1e-05	0	1e-05	1e-05	0	0	0	0	0	0	3e-05	1e-05	1e-05	2e-05	0	1e-05	3e-05	0	0	0	0	0	0	0	0	0	1e-05	1e-05	5e-05	0	0	0	0	0	0	0	0	0	0	0
29354	[Clostridium] celerecrescens	1e-05	0	1e-05	4e-05	1e-05	1e-05	1e-05	0	1e-05	0	1e-05	0	0.00069	0.00107	0.00029	0.00056	0.00068	0.0005	0	1e-05	1e-05	0	0	1e-05	0	0.00017	0.00072	0.0007	0.0029	0.00026	0.00054	0.00025	0.00061	0	1e-05	1e-05	3e-05	0	1e-05	0	0.00277	0.00028	0.00047	0.00027	0.00025	6e-05	0.00049	0.00256
1946709	Lachnoclostridium sp. UBA903	1e-05	1e-05	1e-05	2e-05	1e-05	1e-05	1e-05	1e-05	1e-05	1e-05	1e-05	1e-05	0	0	0	0	0	0	1e-05	1e-05	1e-05	1e-05	0	1e-05	1e-05	0	0	0	0	0	0	0	0	1e-05	1e-05	1e-05	2e-05	0	1e-05	0	0	0	0	0	0	0	0	0
99656	[Clostridium] fimetarium	1e-05	0	1e-05	5e-05	1e-05	1e-05	0	1e-05	1e-05	0	1e-05	4e-05	4e-05	6e-05	2e-05	0	0.00018	0	0	1e-05	0	1e-05	0	0	1e-05	2e-05	0	0	0	0	0	4e-05	7e-05	0	0	1e-05	5e-05	0	0	0	0	0	2e-05	0	0	0	0	0
1946682	Lachnoclostridium sp. UBA1175	0	0	1e-05	3e-05	1e-05	1e-05	3e-05	1e-05	1e-05	1e-05	1e-05	2e-05	0	0	0	0	0	0	2e-05	1e-05	1e-05	3e-05	0	1e-05	1e-05	0	0	0	0	0	0	0	0	0	1e-05	1e-05	3e-05	0	2e-05	2e-05	0	0	0	0	0	0	0	0
1946684	Lachnoclostridium sp. UBA1308	0	0	1e-05	4e-05	0	0	0	0	0	0	0	0	0	0	0	0	0	0	0	1e-05	1e-05	0	0	0	1e-05	0	0	0	0	0	0	0	0	0	1e-05	1e-05	3e-05	0	1e-05	0	0	0	0	0	0	0	0	0
1946701	Lachnoclostridium sp. UBA7122	0	1e-05	1e-05	7e-05	1e-05	1e-05	0	1e-05	1e-05	1e-05	2e-05	1e-05	0	0	0	0	0	0	1e-05	1e-05	1e-05	0	0	1e-05	1e-05	0	0	0	0	0	0	0	0	1e-05	1e-05	1e-05	7e-05	1e-05	0	0	0	0	0	0	0	0	0	0
81424	[Clostridium] methoxybenzovorans	1e-05	3e-05	2e-05	2e-05	1e-05	2e-05	2e-05	1e-05	3e-05	1e-05	3e-05	3e-05	0	0	0	0	0	0	1e-05	2e-05	5e-05	2e-05	0	4e-05	1e-05	0	0	0	0	0	0	0	0	0	4e-05	1e-05	1e-05	1e-05	1e-05	1e-05	0	0	0	0	0	0	0	0
1946683	Lachnoclostridium sp. UBA1241	0	0	0	4e-05	1e-05	1e-05	1e-05	0	1e-05	0	1e-05	0	0	0	0	0	0	0	0	0	1e-05	1e-05	0	0	0	0	0	0	0	0	0	0	0	0	1e-05	1e-05	3e-05	0	0	1e-05	0	0	0	0	0	0	0	0
1946710	Lachnoclostridium sp. UBA933	0	0	0	1e-05	0	0	0	0	0	0	0	0	0	0	0	0	0	0	0	0	0	0	0	0	0	0	0	0	0	0	0	0	0	0	0	0	1e-05	0	0	0	0	0	0	0	0	0	0	0
1946697	Lachnoclostridium sp. UBA6558	0	1e-05	0	1e-05	0	0	0	0	0	0	1e-05	1e-05	0	0	0	0	0	0	0	1e-05	0	0	0	0	0	0	0	0	0	0	0	0	0	0	0	1e-05	1e-05	0	0	0	0	0	0	0	0	0	0	0
29370	[Clostridium] sphenoides	0	0	0	1e-05	0	0	0	0	1e-05	0	0	2e-05	0	0	0	0	0	0	1e-05	0	0	0	0	0	1e-05	0	0	0	0	0	0	0	0	0	0	0	1e-05	1e-05	0	0	0	0	0	0	0	0	0	0
36832	[Clostridium] aerotolerans	0	0	1e-05	2e-05	2e-05	1e-05	1e-05	0	0	1e-05	0	0	0	0	0	0	0	0	1e-05	1e-05	1e-05	1e-05	0	1e-05	1e-05	0	0	0	0	0	0	0	0	0	1e-05	1e-05	2e-05	0	0	1e-05	0	0	0	0	0	0	0	0
1946686	Lachnoclostridium sp. UBA1781	0	0	1e-05	4e-05	1e-05	1e-05	0	0	0	0	1e-05	0	0	0	0	0	0	0	0	1e-05	1e-05	0	0	1e-05	0	0	0	0	0	0	0	0	0	0	1e-05	1e-05	4e-05	0	0	0	0	0	0	0	0	0	0	0
69825	[Clostridium] indolis	1e-05	0	0	1e-05	0	0	0	0	0	0	0	0	0	0	0	0	0	0	0	0	0	0	0	0	0	0	0	0	0	0	0	0	0	0	0	1e-05	1e-05	0	1e-05	0	0	0	0	0	0	0	0	0
1946706	Lachnoclostridium sp. UBA7290	0	0	4e-05	4e-05	1e-05	4e-05	1e-05	0	1e-05	3e-05	3e-05	0	0	0	0	0	0	0	1e-05	1e-05	2e-05	0	0	4e-05	1e-05	0	0	0	0	0	0	0	0	1e-05	1e-05	1e-05	4e-05	0	1e-05	2e-05	0	0	0	0	0	0	0	0
1946691	Lachnoclostridium sp. UBA3775	0	0	0	4e-05	0	0	1e-05	1e-05	1e-05	0	0	1e-05	0	0	0	0	0	0	1e-05	0	0	1e-05	0	1e-05	0	0	0	0	0	0	0	0	0	1e-05	0	0	4e-05	0	1e-05	1e-05	0	0	0	0	0	0	0	0
58134	[Desulfotomaculum] guttoideum	0	0	0	1e-05	0	0	0	0	0	0	0	0	3e-05	0	5e-05	0	0	0	0	0	0	0	0	0	0	0	0	0	0	0	0	0	2e-05	0	0	0	1e-05	0	0	0	0	0	1e-05	2e-05	0	0	0	0
1946693	Lachnoclostridium sp. UBA5132	0	0	0	0.00011	1e-05	0	2e-05	4e-05	0	4e-05	0	0	0	0	0	0	0	0	0	1e-05	1e-05	2e-05	0	1e-05	0	0	0	0	0	0	0	0	0	0	1e-05	2e-05	0.00013	0	0	1e-05	0	0	0	0	0	0	0	0
1870993	Tyzzerella sp. Marseille-P3062	0.00155	0.00126	0.00084	0.00033	0.00092	0.00126	0.00028	0.00076	0.00244	0.0016	0.00089	0.00012	0	0	0	0	0	4e-05	0.0009	0.00158	0.00041	0.00028	0	0.00032	0.01847	0	0.00332	0	0	0	0	0.0001	0	0.00101	0.00052	0.00046	0.00058	0.0016	0.00016	0.00011	0	6e-05	2e-05	0	0.00085	0	0	0
29361	Tyzzerella nexilis	0.0011	0.00169	0.00035	0.00065	0.00048	0.00038	0.00024	0.00104	0.0043	0.00056	0.00043	0.00053	0	0	0	0	0	0	0.00289	0.00168	0.0007	0.00042	0	0.00064	0.00134	0	0	0	0	0	0	0	0	0.0039	0.00218	0.00065	0.00062	0.00311	0.00023	0.00025	0	0	2e-05	0	0	0	0	0
1965545	Tyzzerella sp. An114	0	0	1e-05	3e-05	2e-05	1e-05	3e-05	1e-05	4e-05	1e-05	1e-05	1e-05	0	0	0	0	0	0	3e-05	1e-05	1e-05	1e-05	0	2e-05	2e-05	8e-05	3e-05	0	0	0	0	0.00017	2e-05	1e-05	2e-05	2e-05	3e-05	1e-05	2e-05	1e-05	0	0	2e-05	3e-05	3e-05	3e-05	8e-05	0
1947765	Tyzzerella sp. UBA1042	0	0	1e-05	1e-05	1e-05	0	1e-05	0	1e-05	0	0	0	0	0	0	0	0	0	0	0	1e-05	2e-05	0	1e-05	1e-05	0	0	0	0	0	0	0	0	0	1e-05	1e-05	1e-05	0	2e-05	1e-05	0	0	0	0	0	0	0	0
446043	uncultured Lachnospira sp.	0.00038	0.00035	0.0004	0.00034	0.00088	0.00038	0.00023	0.00045	0.00028	0.00048	0.00056	0.00029	4e-05	0	3e-05	0	0	0	0.00012	0.00136	0.00051	0.00017	0	0.00035	0.00073	0	0	0	0	0	0	0	0.0001	0.00015	0.00028	0.00036	0.0002	0.00013	7e-05	0.0001	0	0	0	0	0	0	0	0
28052	Lachnospira pectinoschiza	0.00022	0.00035	0.00454	0.00129	0.00696	0.00149	0.00028	0.0003	0.00196	0.00037	0.00195	0.00119	0.00089	0.00571	0.0006	3e-05	0.0011	0.00292	0.00114	0.00043	0.00036	0.00028	0	0.0009	0.00024	0.00108	0.00043	0.00017	0.00017	0.00398	0.00054	0.00367	0.00256	0.00125	0.00047	0.00048	0.00323	0.00092	2e-05	0.00016	7e-05	0.00968	0.00122	0.00214	0.00193	0.0039	0.00109	0.00908
1946725	Lachnospira sp. UBA5912	1e-05	7e-05	5e-05	0.00011	3e-05	4e-05	1e-05	2e-05	2e-05	1e-05	4e-05	1e-05	0	0	0	0	0	0	1e-05	7e-05	3e-05	1e-05	0	5e-05	0	0	0	0	0	0	0	0	0	1e-05	2e-05	3e-05	0.00011	1e-05	0	1e-05	0	0	0	0	0	0	0	0
1946712	Lachnospira sp. UBA2821	1e-05	2e-05	2e-05	0.00022	2e-05	2e-05	1e-05	1e-05	2e-05	2e-05	2e-05	1e-05	0	2e-05	0	0	0	0	0	2e-05	1e-05	1e-05	0	1e-05	7e-05	0	0	0	0	0	0	0	0	2e-05	2e-05	3e-05	0.00019	1e-05	1e-05	1e-05	0	0	0	0	0	0	0	0
1946726	Lachnospira sp. UBA7007	1e-05	1e-05	2e-05	0.00011	3e-05	3e-05	2e-05	2e-05	3e-05	0	2e-05	0	0	0	0	0	0	0	1e-05	2e-05	2e-05	0	0	2e-05	0.00011	0	0	0	0	0	0	0	0	3e-05	2e-05	0.0001	0.00011	1e-05	1e-05	8e-05	0	0	0	0	0	0	0	0
28051	Lachnospira multipara	1e-05	1e-05	1e-05	0.00017	1e-05	1e-05	1e-05	1e-05	2e-05	1e-05	1e-05	3e-05	0	0	0	0	0	0	1e-05	2e-05	1e-05	2e-05	0	1e-05	2e-05	0	0	0	0	0	0	0	0	0.00022	1e-05	2e-05	0.00016	1e-05	1e-05	1e-05	0	0	0	0	0	0	0	0
1946711	Lachnospira sp. UBA2803	1e-05	0	1e-05	0.00013	1e-05	0	0	1e-05	1e-05	0	1e-05	2e-05	0	0	0	0	0	0	1e-05	0	0	1e-05	0	0	0	0	0	0	0	0	0	0	0	0	0	1e-05	0.00012	1e-05	0	0	0	0	0	0	0	0	0	0
1946720	Lachnospira sp. UBA4285	1e-05	1e-05	1e-05	4e-05	2e-05	1e-05	2e-05	1e-05	1e-05	1e-05	1e-05	2e-05	0	0	0	0	0	0	4e-05	1e-05	1e-05	4e-05	0	3e-05	3e-05	0	0	0	0	0	0	0	0	0	2e-05	1e-05	4e-05	0	2e-05	2e-05	0	0	0	0	0	0	0	0
1946713	Lachnospira sp. UBA3212	0	0	0	5e-05	1e-05	0	0	0	1e-05	0	1e-05	0	0	0	0	0	0	0	0	1e-05	1e-05	0	0	1e-05	0	0	0	0	0	0	0	0	0	0	0	1e-05	5e-05	0	0	0	0	0	0	0	0	0	0	0
1946717	Lachnospira sp. UBA3790	0	0	0	2e-05	0	0	0	0	0	0	0	0	0	0	0	0	0	0	0	0	0	0	0	0	1e-05	0	0	0	0	0	0	0	0	0	0	0	2e-05	0	0	0	0	0	0	0	0	0	0	0
1946716	Lachnospira sp. UBA3780	0	0	0	4e-05	0	0	0	0	0	0	0	0	0	0	0	0	0	0	0	0	0	0	0	0	0	0	0	0	0	0	0	0	0	0	0	0	4e-05	0	0	0	0	0	0	0	0	0	0	0
45851	Butyrivibrio crossotus	0.00026	0.00063	0.00074	0.00079	0.00023	0.00096	0.00015	0.00014	0.00015	0.00024	0.00034	0.00036	0	0	0	0.00012	0.00321	0	0.00011	0.00056	0.00024	0.00014	0	0.00026	0.00032	0	0.00018	0	0	0.00059	0	0	0	7e-05	0.00017	0.00462	0.00057	9e-05	4e-05	0.00013	0	0	0	9e-05	0.00515	0	0	0
1262761	Butyrivibrio sp. CAG:318	2e-05	5e-05	5e-05	0.00906	4e-05	4e-05	8e-05	6e-05	4e-05	3e-05	5e-05	0.0004	0	0	0	0	0	0	3e-05	6e-05	2e-05	0.00152	0.02153	0.00018	4e-05	0	0	0	0	0	0	0	0	3e-05	3e-05	9e-05	0.00091	2e-05	2e-05	0.00063	0	0	0	0	0	0	0	0
1263062	Butyrivibrio crossotus CAG:259	2e-05	2e-05	0.00013	0.00025	2e-05	0.00031	3e-05	6e-05	2e-05	2e-05	0.00023	2e-05	0	0	0	0	0	0	2e-05	2e-05	4e-05	3e-05	0	4e-05	4e-05	0	0	0	0	0	0	0	0	0	0.00024	0.00277	0.00023	2e-05	2e-05	3e-05	0	0	0	0	0	0	0	0
43305	Butyrivibrio proteoclasticus	2e-05	2e-05	2e-05	0.0001	2e-05	2e-05	2e-05	2e-05	2e-05	1e-05	2e-05	4e-05	0	0	0	0	0	0	1e-05	2e-05	2e-05	2e-05	0	4e-05	2e-05	0	0	0	0	0	0	0	0	1e-05	2e-05	2e-05	0.00011	1e-05	1e-05	1e-05	0	0	0	0	0	0	0	0
831	Butyrivibrio fibrisolvens	2e-05	2e-05	3e-05	0.00012	2e-05	3e-05	3e-05	4e-05	3e-05	2e-05	4e-05	2e-05	0.00017	0	0	7e-05	0.00011	0.00123	2e-05	2e-05	3e-05	1e-05	0	3e-05	4e-05	0.0005	9e-05	0	0.00569	0.00041	0.00013	0.00414	0.00022	2e-05	2e-05	2e-05	0.00012	2e-05	2e-05	1e-05	0.0018	0	0.00019	0.00015	4e-05	0.00122	0.00052	0.00017
185008	Butyrivibrio hungatei	1e-05	3e-05	1e-05	6e-05	1e-05	1e-05	2e-05	2e-05	3e-05	2e-05	1e-05	0	0	0	0	0	0	0	2e-05	3e-05	1e-05	1e-05	0	2e-05	2e-05	0	0	0	0	0	0	0	0	5e-05	3e-05	1e-05	6e-05	2e-05	1e-05	1e-05	0	0	0	0	0	0	0	0
1520812	Butyrivibrio sp. YAB3001	1e-05	1e-05	1e-05	6e-05	1e-05	1e-05	0	1e-05	1e-05	1e-05	1e-05	1e-05	3e-05	0	0	3e-05	5e-05	0.00014	1e-05	1e-05	1e-05	1e-05	0	1e-05	1e-05	6e-05	0	0	0	0	0	0	7e-05	0	1e-05	1e-05	6e-05	0	1e-05	0	0.00015	0	0	0	0	0	0	0
1408304	Butyrivibrio sp. FCS014	1e-05	1e-05	1e-05	3e-05	1e-05	1e-05	1e-05	1e-05	1e-05	0	1e-05	1e-05	0	0	0	0	0	0	1e-05	1e-05	1e-05	1e-05	0	1e-05	1e-05	0	0	0	0	0	0	0	0	0	1e-05	1e-05	4e-05	0	0	1e-05	0	0	0	2e-05	0	0	0	0
1280672	Butyrivibrio sp. AC2005	1e-05	0	0	3e-05	1e-05	1e-05	1e-05	1e-05	1e-05	0	1e-05	1e-05	0	0	0	0	0	0	0	1e-05	0	0	0	1e-05	0	0	0	0	0	0	0	0	0	0	0	1e-05	3e-05	0	1e-05	0	0	0	0	0	0	0	0	0
1280686	Butyrivibrio sp. MC2013	1e-05	1e-05	1e-05	6e-05	1e-05	1e-05	1e-05	1e-05	1e-05	0	1e-05	2e-05	0	0	0	0	0	0	1e-05	2e-05	1e-05	1e-05	0	1e-05	1e-05	0	0	0	0	0	0	0	0	0	1e-05	2e-05	5e-05	0	1e-05	1e-05	0	0	0	0	0	0	0	0
1520808	Butyrivibrio sp. INlla14	1e-05	0	0	2e-05	1e-05	0	0	1e-05	1e-05	0	0	0	0.00012	0.00043	0	0.00026	0.00017	0.00082	0	0	0	0	0	1e-05	0	0.00017	0.00035	0.00057	0.00284	0.00012	0.00014	0.00046	7e-05	0	0	1e-05	2e-05	0	1e-05	0	0.00041	0	0.00013	0.00019	2e-05	0.00028	0.00035	0.00061
1506994	Butyrivibrio sp. AE3004	1e-05	0	0	3e-05	1e-05	1e-05	0	1e-05	1e-05	0	1e-05	3e-05	0	0.00014	0.00013	3e-05	0.00075	0.00027	0	1e-05	1e-05	1e-05	0	2e-05	0	0.00024	8e-05	5e-05	0.00183	3e-05	0	0	4e-05	0	1e-05	1e-05	2e-05	0	2e-05	0	0.0003	0.00454	3e-05	7e-05	3e-05	0.00031	0.0008	0.00016
1280679	Butyrivibrio sp. VCB2006	1e-05	1e-05	0	3e-05	0	0	0	1e-05	0	0	0	1e-05	0	0	0	0	0	0	0	0	0	0	0	1e-05	0	0	0	0	0	0	0	0	0	0	0	0	3e-05	0	1e-05	0	0	0	0	0	0	0	0	0
1280663	Butyrivibrio sp. AE2015	1e-05	1e-05	0	2e-05	0	0	0	1e-05	0	0	1e-05	0	0	0	0	0	0	0	0	1e-05	0	0	0	1e-05	0	0	0	0	0	0	0	0	0	0	0	1e-05	2e-05	0	0	0	0	0	0	0	0	0	0	0
1280685	Butyrivibrio sp. NC3005	1e-05	0	2e-05	5e-05	1e-05	2e-05	1e-05	1e-05	1e-05	1e-05	3e-05	2e-05	0	0	0	0	0	0	0	1e-05	1e-05	1e-05	0	1e-05	1e-05	0	0	0	0	0	0	0	0	1e-05	0	1e-05	4e-05	0	0	0	0	0	0	0	0	0	0	0
1408305	Butyrivibrio sp. LB2008	0	0	1e-05	4e-05	0	1e-05	0	0	0	1e-05	1e-05	0	0	0	0	0	0	0	0	0	1e-05	0	0	1e-05	0	0	0	0	0	0	0	0	0	0	0	1e-05	4e-05	0	1e-05	0	0	0	0	0	0	0	0	0
1280666	Butyrivibrio sp. AE3009	0	1e-05	0	5e-05	1e-05	0	1e-05	1e-05	0	1e-05	0	0	0	0	0	0	0	0	0	1e-05	1e-05	0	0	1e-05	1e-05	0	0	0	0	0	0	0	0	0	1e-05	1e-05	4e-05	0	0	0	0	0	0	2e-05	0	0	0	0
1410610	Butyrivibrio sp. NC2002	0	1e-05	1e-05	7e-05	1e-05	1e-05	0	1e-05	1e-05	0	1e-05	1e-05	0	0	0	0	0	0	0	0	1e-05	0	0	1e-05	1e-05	0	0	0	0	0	0	0	0	1e-05	0	1e-05	7e-05	0	0	0	0	0	0	0	0	0	0	0
1408306	Butyrivibrio sp. MC2021	0	0	1e-05	3e-05	1e-05	1e-05	1e-05	1e-05	1e-05	2e-05	0	2e-05	0	0	0	0	0	0	1e-05	1e-05	1e-05	1e-05	0	1e-05	1e-05	0	0	0	0	0	0	0	0	2e-05	1e-05	1e-05	3e-05	1e-05	1e-05	1e-05	0	0	0	0	0	0	0	0
1280673	Butyrivibrio sp. AE3006	0	0	1e-05	3e-05	1e-05	1e-05	0	1e-05	0	0	1e-05	0	0	0	0	0	0	0	0	0	1e-05	0	0	1e-05	0	0	0	0	0	0	0	0	0	0	1e-05	0	2e-05	0	0	0	0	0	0	0	0	0	0	0
1280676	Butyrivibrio sp. WCD3002	0	0	0	2e-05	1e-05	0	0	1e-05	1e-05	0	0	1e-05	0	0	0	0	0	0	1e-05	0	1e-05	1e-05	0	2e-05	1e-05	0	0	0	0	0	0	0	0	0	1e-05	1e-05	2e-05	0	0	0	0	0	0	0	0	0	0	0
1946147	Butyrivibrio sp. UBA3740	0	1e-05	0	3e-05	1e-05	0	1e-05	0	0	0	0	0	0	0	0	0	0	0	0	1e-05	0	0	0	1e-05	0	0	0	0	0	0	0	0	0	0	0	1e-05	3e-05	0	0	0	0	0	0	0	0	0	0	0
1855323	Butyrivibrio sp. M55	0	1e-05	0	2e-05	1e-05	0	0	1e-05	0	1e-05	0	0	0	0	0	0	0	0	0	1e-05	1e-05	0	0	0	1e-05	0	0	0	0	0	0	0	0	0	0	1e-05	2e-05	0	1e-05	0	0	0	0	0	0	0	0	0
1280683	Butyrivibrio sp. NC2007	0	0	0	2e-05	0	0	0	0	0	0	0	0	0	0	0	0	0	0	0	0	0	0	0	0	0	0	0	0	0	0	0	0	0	0	0	0	2e-05	0	1e-05	0	0	0	0	0	0	0	0	0
1280682	Butyrivibrio sp. XBB1001	0	1e-05	0	2e-05	0	0	0	0	0	0	0	0	0	0	0	0	0	0	0	1e-05	0	0	0	0	0	0	0	0	0	0	0	0	0	0	0	0	2e-05	0	0	0	0	0	0	0	0	0	0	0
1280681	Butyrivibrio sp. WCD2001	0	0	0	1e-05	0	0	1e-05	0	1e-05	0	0	0	0	0	0	0	0	0	2e-05	0	0	0	0	0	1e-05	0	0	0	0	0	0	0	0	1e-05	1e-05	0	1e-05	1e-05	0	0	0	0	0	0	0	0	0	0
1280667	Butyrivibrio sp. VCB2001	0	0	1e-05	2e-05	0	0	0	0	0	0	1e-05	1e-05	0	0	0	0	0	0	1e-05	0	0	1e-05	0	1e-05	1e-05	0	0	0	0	0	0	0	0	0	0	0	2e-05	0	0	0	0	0	0	0	0	0	0	0
1280664	Butyrivibrio sp. VCD2006	0	1e-05	0	3e-05	1e-05	0	1e-05	1e-05	0	0	1e-05	1e-05	0	0	0	0	0	0	0	1e-05	1e-05	0	0	2e-05	1e-05	0	0	0	0	0	0	0	0	0	0	1e-05	3e-05	0	1e-05	0	0	0	0	0	0	0	0	0
1280668	Butyrivibrio sp. XPD2006	0	0	1e-05	2e-05	1e-05	1e-05	1e-05	1e-05	1e-05	0	1e-05	1e-05	0	0	0	0	0	0	0	0	1e-05	0	0	2e-05	1e-05	0	0	0	0	0	0	0	0	0	1e-05	1e-05	2e-05	1e-05	1e-05	0	0	0	0	0	0	0	0	0
1280680	Butyrivibrio sp. LC3010	0	0	0	2e-05	0	0	0	0	0	0	0	0	0	0	0	0	0	0	0	0	1e-05	0	0	0	0	0	0	0	0	0	0	0	0	0	0	0	2e-05	0	1e-05	0	0	0	0	0	0	0	0	0
1520806	Butyrivibrio sp. INlla18	0	0	0	1e-05	0	0	0	0	0	0	1e-05	0	0	0	0	0	0	0	0	0	0	0	0	1e-05	0	0	0	0	0	0	0	0	0	0	0	0	1e-05	0	0	0	0	0	0	0	0	0	0	0
1520811	Butyrivibrio sp. INlla21	0	0	0	2e-05	1e-05	0	1e-05	0	0	0	1e-05	1e-05	0	0	0	0	0	0	0	1e-05	1e-05	0	0	1e-05	1e-05	0	0	0	0	0	0	0	0	0	0	1e-05	2e-05	0	1e-05	0	0	0	0	0	0	0	0	0
1280670	Butyrivibrio sp. AD3002	0	0	0	1e-05	1e-05	0	0	0	1e-05	0	0	0	0	0	0	0	0	0	0	0	0	0	0	1e-05	0	0	0	0	0	0	0	0	0	0	0	0	1e-05	0	0	0	0	0	0	0	0	0	0	0
1520809	Butyrivibrio sp. TB	0	1e-05	0	1e-05	0	0	0	0	0	0	0	2e-05	0	0	0	0	0	0	0	1e-05	0	1e-05	0	0	0	0	0	0	0	0	0	0	0	1e-05	0	0	0	0	0	0	0	0	0	0	0	0	0	0
1280665	Butyrivibrio sp. XPD2002	0	0	2e-05	2e-05	0	2e-05	0	0	0	0	0	2e-05	0	0	0	0	0	0	0	0	0	0	0	0	1e-05	0	0	0	0	0	0	0	0	0	0	0	3e-05	0	0	0	0	0	0	0	0	0	0	0
180311	Hespellia stercorisuis	0.00013	0.00019	9e-05	9e-05	0.00011	0.00011	4e-05	0.00015	9e-05	0.00014	0.0001	5e-05	2e-05	0.00016	0.00011	0.00014	0	3e-05	2e-05	0.00017	8e-05	5e-05	0	4e-05	8e-05	3e-05	5e-05	9e-05	0.00032	4e-05	0.00013	0	0.00018	0.0004	0.00013	4e-05	9e-05	5e-05	0.00011	2e-05	0.00055	4e-05	8e-05	0	7e-05	0	7e-05	0.00046
467210	Lachnoanaerobaculum saburreum	0.0001	5e-05	6e-05	9e-05	6e-05	7e-05	2e-05	1e-05	3e-05	4e-05	7e-05	5e-05	0	0	0	0	0	0	1e-05	5e-05	3e-05	2e-05	0	3e-05	0.00045	0	0	0	6e-05	0	0	0	0	1e-05	2e-05	4e-05	8e-05	1e-05	1e-05	2e-05	0	0	0	0	0	0	0	0
936595	Lachnoanaerobaculum sp. OBRC5-5	2e-05	5e-05	2e-05	0.00015	6e-05	1e-05	6e-05	3e-05	1e-05	5e-05	1e-05	2e-05	0	0	0	0	0.00044	0	0.00015	4e-05	1e-05	5e-05	0	3e-05	3e-05	0	0	0	0	0	0	0	0	0	4e-05	6e-05	0.00018	0	1e-05	0.00014	0	0	0	0	0	0	0	0
936594	Lachnoanaerobaculum sp. ICM7	1e-05	0	1e-05	1e-05	1e-05	1e-05	0	0	0	0	1e-05	4e-05	0	0	0	0	0	0	0	1e-05	0	1e-05	0	0	1e-05	0	0	0	0	0	0	0	0	0	0	1e-05	1e-05	0	0	0	0	0	0	0	0	0	0	0
1947020	Oribacterium sp. UBA6992	2e-05	1e-05	0	2e-05	0	0	0	1e-05	0	0	0	0	0	0	0	0	0	0	0	2e-05	0	0	0	0	0	0	0	0	0	0	0	0	0	0	0	0	2e-05	0	0	0	0	0	0	0	0	0	0	0
652706	Oribacterium sp. oral taxon 078	1e-05	1e-05	1e-05	4e-05	3e-05	1e-05	3e-05	2e-05	2e-05	1e-05	2e-05	2e-05	0	0	0	0	0	0	2e-05	1e-05	2e-05	2e-05	0	2e-05	2e-05	0	0	0	0	0	0	6e-05	3e-05	0	2e-05	2e-05	4e-05	1e-05	4e-05	2e-05	5e-05	0	1e-05	0	0	0	0	2e-05
1947015	Oribacterium sp. UBA2880	1e-05	2e-05	3e-05	7e-05	5e-05	1e-05	9e-05	4e-05	3e-05	1e-05	2e-05	2e-05	0	0	0	0	0	0	1e-05	2e-05	3e-05	4e-05	0	3e-05	3e-05	0	0	0	0	0	0	0	0	0	2e-05	0.00016	8e-05	0	0	2e-05	0	0	0	0	0	0	0	0
1501332	Oribacterium asaccharolyticum	1e-05	1e-05	1e-05	2e-05	1e-05	2e-05	1e-05	0	1e-05	1e-05	2e-05	0	0	0	0	0	0	0	1e-05	1e-05	1e-05	1e-05	0	1e-05	1e-05	0	0	0	0	0	0	0	0	0	1e-05	1e-05	2e-05	0	1e-05	0	0	0	0	0	0	0	0	0
1410612	Oribacterium sp. P6A1	1e-05	0	0	2e-05	1e-05	0	0	0	0	0	1e-05	0	0	0	0	0	0	0	0	0	0	0	0	0	0	0	0	0	0	0	0	0	0	0	0	0	2e-05	0	1e-05	0	0	0	0	0	0	0	0	0
1947017	Oribacterium sp. UBA4274	1e-05	0	1e-05	1e-05	0	1e-05	0	0	0	0	1e-05	1e-05	0	0	0	0	0	0	0	0	0	0	0	1e-05	0	0	0	0	0	0	0	0	0	0	0	0	1e-05	0	0	0	0	0	0	0	0	0	0	0
689781	Oribacterium sp. NK2B42	1e-05	0	1e-05	2e-05	1e-05	1e-05	1e-05	0	0	1e-05	1e-05	1e-05	0	0	0	0	0	0	0	1e-05	2e-05	0	0	2e-05	1e-05	0	0	0	0	0	0	0	0	0	1e-05	1e-05	2e-05	0	1e-05	1e-05	0	0	0	0	0	0	0	0
1501329	Oribacterium parvum	1e-05	2e-05	1e-05	1e-05	1e-05	2e-05	4e-05	1e-05	1e-05	2e-05	3e-05	3e-05	3e-05	0	0	0	5e-05	0	1e-05	1e-05	1e-05	1e-05	0	1e-05	1e-05	0	0	0	0	0	0	0	0.00016	1e-05	0	2e-05	1e-05	0	1e-05	0	0	0	0	0	0	0	0	0
237576	Oribacterium sinus	1e-05	6e-05	1e-05	1e-05	1e-05	1e-05	3e-05	0	1e-05	0	2e-05	1e-05	0	0	0	0	0	0	0	2e-05	2e-05	0	0	1e-05	1e-05	0	0	0	0	0	0	0	0	0	0	2e-05	1e-05	0	0	0	0	0	0	0	0	0	0	0
1855342	Oribacterium sp. KHPX15	0	0	1e-05	2e-05	1e-05	1e-05	1e-05	0	1e-05	1e-05	1e-05	0	0	0	0	0	0	0	0	0	0	0	0	1e-05	0	0	0	0	0	0	0	0	0	0	0	0	2e-05	0	0	0	0	0	0	0	0	0	0	0
1947019	Oribacterium sp. UBA5894	0	0	1e-05	1e-05	1e-05	1e-05	1e-05	1e-05	1e-05	0	1e-05	1e-05	0	0	0	0	0	0	0	1e-05	1e-05	1e-05	0	1e-05	1e-05	0	0	0	0	0	0	0	0	0	1e-05	1e-05	1e-05	0	1e-05	1e-05	0	0	0	0	0	0	0	0
1855343	Oribacterium sp. WCC10	0	1e-05	0	1e-05	1e-05	0	0	1e-05	1e-05	1e-05	1e-05	0	0	0	0	0	0	0	0	1e-05	1e-05	0	0	2e-05	1e-05	0	0	0	0	0	0	0	0	1e-05	0	1e-05	1e-05	0	0	0	0	0	0	0	0	0	0	0
1943579	Oribacterium sp. C9	0	0	0	2e-05	0	1e-05	1e-05	1e-05	1e-05	0	0	1e-05	0	0	0	0	0	0	1e-05	0	0	0	0	0	1e-05	0	0	0	0	0	0	0	0	1e-05	0	1e-05	1e-05	1e-05	0	0	0	0	0	0	0	0	0	0
712414	Oribacterium sp. oral taxon 108	0	1e-05	2e-05	1e-05	1e-05	2e-05	1e-05	0	1e-05	2e-05	1e-05	2e-05	2e-05	8e-05	0	9e-05	0	0	0	1e-05	1e-05	0	0	1e-05	2e-05	0	0.0001	0.00018	0	2e-05	5e-05	0	0	1e-05	0	0	1e-05	1e-05	0	0	0	0	0	0.00014	0	0	2e-05	0.00011
1947016	Oribacterium sp. UBA3737	0	0	0	6e-05	0	0	2e-05	0	0	0	0	1e-05	0	0	0	0	0	0	0	0	1e-05	0	0	1e-05	0	0	0	0	0	0	0	0	0	0	1e-05	0	4e-05	0	1e-05	0	0	0	0	0	0	0	0	0
1947018	Oribacterium sp. UBA4289	0	0	1e-05	2e-05	1e-05	1e-05	0	0	1e-05	0	0	0	0	0	0	0	0	0	0	0	0	0	0	0	0	0	0	0	0	0	0	0	0	0	0	0	1e-05	0	0	0	0	0	0	0	0	0	0	0
168384	Marvinbryantia formatexigens	0.0001	0.00017	6e-05	0.00014	0.00013	7e-05	6e-05	7e-05	0.00017	8e-05	0.0001	7e-05	4e-05	9e-05	6e-05	0.00018	7e-05	3e-05	7e-05	0.00018	8e-05	8e-05	0	9e-05	0.00033	0.0002	0.00013	9e-05	0.00034	0.00011	7e-05	9e-05	0.00012	4e-05	0.00017	7e-05	0.00014	0.00014	7e-05	3e-05	0.00035	0.00026	2e-05	3e-05	0.00023	0	0.0001	0.00022
1469950	Robinsoniella sp. KNHs210	5e-05	4e-05	1e-05	7e-05	2e-05	2e-05	1e-05	3e-05	1e-05	2e-05	2e-05	1e-05	0	0	0	0	0	0	1e-05	5e-05	2e-05	0	0	1e-05	4e-05	0	0	0	0	0	0	0	0	2e-05	2e-05	2e-05	7e-05	1e-05	2e-05	1e-05	0	0	0	0	0	0	0	0
180332	Robinsoniella peoriensis	1e-05	0	1e-05	1e-05	1e-05	1e-05	1e-05	1e-05	1e-05	1e-05	1e-05	1e-05	2e-05	0	0	0	0	0	0	0	1e-05	1e-05	0	1e-05	0	0	0.00022	0	5e-05	2e-05	0	0	0.00014	0	1e-05	1e-05	1e-05	0	1e-05	0	0.00014	0	1e-05	0	0	7e-05	0	0
1653435	Merdimonas faecis	6e-05	4e-05	4e-05	0.0001	4e-05	3e-05	5e-05	0.00014	6e-05	4e-05	4e-05	2e-05	0	0	0	0	0	0	1e-05	5e-05	0.00104	3e-05	0	6e-05	0.00013	0	0	0	0	0	0	0	2e-05	3e-05	0.00048	5e-05	8e-05	2e-05	0.00015	2e-05	0	0	1e-05	2e-05	4e-05	0	2e-05	0
160404	Anaerotignum lactatifermentans	4e-05	8e-05	0.00011	0.00029	0.0002	0.0001	0.00014	8e-05	0.00022	0.00024	0.0001	8e-05	3e-05	0.0001	0	3e-05	0	0.00052	0.00014	8e-05	0.00126	0.00022	0	0.00022	0.00032	0.00084	0.00096	0	0	0	0	0.00132	0.0021	0.00013	0.00057	0.00041	0.0003	5e-05	0.00073	0.00012	0	0	0.00015	0	0.0003	0.00025	3e-05	0
36847	Anaerotignum neopropionicum	2e-05	2e-05	2e-05	3e-05	2e-05	2e-05	4e-05	3e-05	4e-05	2e-05	3e-05	3e-05	8e-05	0	4e-05	0.00011	0.00015	5e-05	1e-05	2e-05	3e-05	3e-05	0	3e-05	0.00013	3e-05	8e-05	0.00034	0.00029	6e-05	5e-05	0	7e-05	1e-05	2e-05	3e-05	3e-05	1e-05	2e-05	2e-05	0.0002	4e-05	6e-05	8e-05	0	3e-05	0	0.00018
28446	Anaerotignum propionicum	0	0	0	1e-05	0	0	1e-05	0	0	0	0	0	0	0	0	0	0	0	0	0	0	0	0	0	0	0	0	0	0	0	0	0	0	0	0	1e-05	1e-05	0	1e-05	0	0	0	0	0	0	0	0	0
46206	Pseudobutyrivibrio ruminis	1e-05	3e-05	3e-05	0.00012	3e-05	3e-05	3e-05	2e-05	4e-05	2e-05	4e-05	6e-05	0.00016	0	0	0.00031	0.00021	0.00013	3e-05	3e-05	2e-05	2e-05	0	2e-05	1e-05	0.0001	0.00018	0.00015	0.0001	4e-05	2e-05	0.00011	0.0003	2e-05	2e-05	2e-05	0.00012	3e-05	1e-05	1e-05	0	0	6e-05	9e-05	5e-05	0.00014	4e-05	0.00038
1520801	Pseudobutyrivibrio sp. ACV-2	1e-05	1e-05	1e-05	3e-05	1e-05	1e-05	1e-05	1e-05	1e-05	1e-05	1e-05	0.0001	0	0	0	0	0	0	0	1e-05	1e-05	2e-05	0	1e-05	1e-05	0	0	0	0	0	0	0	0	2e-05	2e-05	1e-05	4e-05	1e-05	1e-05	0	0	0	0	0	0	0	0	0
1855344	Pseudobutyrivibrio sp. 49	1e-05	0	1e-05	2e-05	0	1e-05	0	0	0	1e-05	0	3e-05	0	0	0	0	0	0	0	0	0	1e-05	0	0	0	0	0	0	0	0	0	0	0	0	0	1e-05	3e-05	0	0	0	0	0	0	0	0	0	0	0
1947296	Pseudobutyrivibrio sp. UBA1225	0	0	0	2e-05	1e-05	0	0	0	1e-05	0	0	1e-05	0	0	0	0	0	0	1e-05	0	0	1e-05	0	1e-05	1e-05	0	0	0	0	0	0	0	0	0	1e-05	0	2e-05	1e-05	0	1e-05	0	0	0	0	0	0	0	0
1798168	Pseudobutyrivibrio sp. NOR37	0	0	1e-05	1e-05	1e-05	1e-05	0	0	1e-05	0	1e-05	1e-05	0	0	0	0	0	0	1e-05	1e-05	0	0	0	0	1e-05	0	0	0	0	0	0	0	0	0	1e-05	1e-05	1e-05	1e-05	0	0	0	0	0	0	0	0	0	0
1798186	Pseudobutyrivibrio sp. OR37	0	1e-05	0	4e-05	0	0	1e-05	0	1e-05	0	0	1e-05	0	0	0	0	0	0	0	1e-05	1e-05	0	0	1e-05	1e-05	0	0	0	0	0	0	0	0	3e-05	0	1e-05	4e-05	1e-05	1e-05	2e-05	0	0	0	0	0	0	0	0
185007	Pseudobutyrivibrio xylanivorans	1e-05	2e-05	3e-05	8e-05	1e-05	2e-05	1e-05	1e-05	4e-05	2e-05	2e-05	3e-05	0	0	0	0	0	0	3e-05	1e-05	1e-05	1e-05	0	3e-05	4e-05	0	0	0	0	0	0	0	0	6e-05	2e-05	1e-05	8e-05	2e-05	1e-05	0	0	0	0	0	0	0	0	0
1520802	Pseudobutyrivibrio sp. YE44	0	1e-05	1e-05	4e-05	1e-05	1e-05	0	1e-05	2e-05	2e-05	1e-05	3e-05	0	0	0	0	0	0	2e-05	1e-05	1e-05	1e-05	0	2e-05	2e-05	0	0	0	0	0	0	0	0	3e-05	2e-05	0	5e-05	2e-05	0	0	0	0	0	0	0	0	0	0
1410616	Pseudobutyrivibrio sp. MD2005	0	0	1e-05	3e-05	0	1e-05	0	0	1e-05	1e-05	1e-05	2e-05	0	0	0	0	0	0	1e-05	1e-05	1e-05	0	0	1e-05	1e-05	0	0	0	0	0	0	0	0	1e-05	1e-05	1e-05	2e-05	1e-05	1e-05	0	0	0	0	0	0	0	0	0
39482	Faecalicatena contorta	8e-05	9e-05	0.00017	9e-05	0.00013	0.00029	9e-05	0.00019	0.00059	0.00014	0.00023	0.00023	0	0	0	0	0	0	0.00024	0.00013	0.00021	0.00021	0	0.00011	0.0017	0	0	0	0	0	0	0	0	0.00011	0.00058	0.00021	7e-05	0.00035	0.00037	5e-05	0	0	0	9e-05	0	0	0	0
290055	Faecalicatena fissicatena	1e-05	0	1e-05	4e-05	2e-05	1e-05	1e-05	1e-05	1e-05	1e-05	1e-05	1e-05	0	0	0	0	0	0	0	1e-05	0.00017	0	0	1e-05	1e-05	0	0	0	0.0003	0	0	0	0	1e-05	1e-05	1e-05	2e-05	0	2e-05	0	0	0	0	0	0	0	0	0
796942	Stomatobaculum longum	4e-05	4e-05	1e-05	5e-05	3e-05	2e-05	3e-05	1e-05	3e-05	2e-05	2e-05	2e-05	0.00013	9e-05	2e-05	0.00011	0.00322	0.00031	1e-05	3e-05	2e-05	2e-05	0	2e-05	4e-05	0.00017	0.00018	0.00117	0.00081	0.00011	0.00019	7e-05	0.00025	1e-05	6e-05	3e-05	5e-05	1e-05	3e-05	4e-05	0.00072	0.00026	0.00018	0.00047	7e-05	0.00014	0.00023	0.00082
1720300	Mediterraneibacter massiliensis	4e-05	3e-05	5e-05	3e-05	8e-05	5e-05	2e-05	0.00015	6e-05	6e-05	5e-05	7e-05	0.00011	4e-05	0.00025	0.00068	0	0	2e-05	4e-05	8e-05	5e-05	0	5e-05	0.00014	0	6e-05	0	0	0.00016	2e-05	4e-05	7e-05	0.00034	9e-05	0.0001	3e-05	4e-05	4e-05	2e-05	5e-05	8e-05	2e-05	0.00027	3e-05	0	0.00048	0.00166
43995	Johnsonella ignava	3e-05	4e-05	5e-05	0.00012	0.0001	4e-05	0.00012	5e-05	0.00011	6e-05	5e-05	4e-05	0.00018	0.00027	0.00015	0.00029	0.00038	0.00019	6e-05	4e-05	3e-05	8e-05	0	5e-05	5e-05	0.00017	0.00022	0.00055	0.00126	0.0002	0.00015	7e-05	0.00037	6e-05	5e-05	4e-05	0.00012	1e-05	2e-05	3e-05	0.00077	0.00016	0.00016	0.00021	0.00014	0.00018	0.0002	0.00063
1745713	Bariatricus massiliensis	2e-05	2e-05	4e-05	6e-05	0.00021	5e-05	0.00011	8e-05	8e-05	6e-05	5e-05	4e-05	0	2e-05	0	0	0	0.00013	3e-05	3e-05	0.00025	5e-05	0	5e-05	9e-05	3e-05	3e-05	3e-05	0	0	0	0	6e-05	2e-05	6e-05	8e-05	6e-05	4e-05	5e-05	4e-05	0	0	0	2e-05	0	0	2e-05	0
100134	Anaerocolumna xylanovorans	1e-05	1e-05	1e-05	6e-05	1e-05	1e-05	1e-05	0	1e-05	0	1e-05	0	0	0	0.0004	0	0	0	0	1e-05	1e-05	0	0	1e-05	1e-05	0	0	0	0	0	0	0	0	1e-05	0	1e-05	5e-05	0	1e-05	0	0	0	0	0	0	0	0	0
259063	Anaerocolumna jejuensis	1e-05	1e-05	1e-05	6e-05	1e-05	1e-05	1e-05	1e-05	1e-05	0	1e-05	1e-05	0	0	0	0	0	0	0	1e-05	1e-05	1e-05	0	1e-05	1e-05	0	0	0	0	0	0	0	2e-05	0	1e-05	1e-05	6e-05	0	1e-05	0	0	0	0	0	0	3e-05	0	0
1527	Anaerocolumna aminovalerica	0	1e-05	0	9e-05	1e-05	1e-05	1e-05	1e-05	1e-05	0	2e-05	1e-05	0	0	0	0	0	0	0	1e-05	1e-05	1e-05	0	1e-05	1e-05	0	0	0	0	0	0	0	0	0	1e-05	1e-05	7e-05	0	1e-05	0	0	0	0	0	0	0	0	0
1469948	Kineothrix alysoides	1e-05	1e-05	1e-05	9e-05	1e-05	1e-05	1e-05	2e-05	1e-05	1e-05	2e-05	1e-05	6e-05	0.00015	6e-05	7e-05	0.00011	0.0001	1e-05	2e-05	2e-05	1e-05	0	2e-05	1e-05	5e-05	0.00012	3e-05	0.00019	0.00011	4e-05	2e-05	0.00012	0	1e-05	3e-05	9e-05	0	1e-05	0	0.00029	0.00015	6e-05	5e-05	3e-05	3e-05	8e-05	6e-05
115544	Parasporobacterium paucivorans	1e-05	1e-05	0	2e-05	1e-05	0	0	0	0	0	1e-05	0	0.00038	0.00065	0.0001	0.00018	0.00011	0.00028	0	1e-05	1e-05	0	0	1e-05	0	5e-05	0.00032	6e-05	0.00048	0.00015	0	0.00036	0.00038	0	1e-05	2e-05	2e-05	0	1e-05	0	0.00209	0.00015	9e-05	0.00011	0.00013	3e-05	0.00018	0.00037
1619234	Anaerobium acetethylicum	1e-05	3e-05	2e-05	8e-05	1e-05	2e-05	1e-05	3e-05	2e-05	2e-05	2e-05	1e-05	0	0	0	0	0	0	1e-05	3e-05	2e-05	1e-05	0	2e-05	1e-05	0	0	0	0	0	0	0	0	0.00011	2e-05	2e-05	8e-05	1e-05	1e-05	1e-05	0	0	0	0	0	0	0	0
2382	Acetitomaculum ruminis	1e-05	1e-05	2e-05	8e-05	2e-05	2e-05	1e-05	1e-05	2e-05	2e-05	2e-05	2e-05	0	0	0	0	0	5e-05	1e-05	1e-05	1e-05	0	0	3e-05	2e-05	2e-05	0	0	0	0	0	0	0	3e-05	1e-05	1e-05	8e-05	2e-05	1e-05	0	0	0	0	0	0	0	0	0
29360	Cellulosilyticum lentocellum	1e-05	0	1e-05	3e-05	1e-05	1e-05	1e-05	0	1e-05	0	0	1e-05	0.00065	0.00048	0.00034	0.00066	0.00114	0.00038	0	1e-05	1e-05	0	0	1e-05	1e-05	0.00032	0.00057	0.00117	0.00168	0.0003	0.00036	0.00045	0.00064	1e-05	0	0	4e-05	0	0	0	0.00082	0.00033	0.00035	0.00037	0.00034	0.00038	0.00046	0.00084
425254	Cellulosilyticum ruminicola	0	0	0	2e-05	0	1e-05	0	0	0	0	1e-05	0	4e-05	0	0.0001	0.00011	0.00014	0.00013	0	0	1e-05	0	0	1e-05	0	5e-05	7e-05	0.00015	0.00024	0	2e-05	0	9e-05	0	0	0	2e-05	0	0	0	0.00029	0	4e-05	8e-05	3e-05	0	6e-05	0.00027
1892843	Cellulosilyticum sp. I15G10I2	0	1e-05	0	2e-05	0	0	0	0	0	0	0	1e-05	0	0	0	0	0	0	0	1e-05	0	0	0	0	0	2e-05	0	0	0	0	0	0	0	0	0	0	1e-05	0	0	0	0	4e-05	0	0	0	0	0	0
1712665	Agathobacter ruminis	1e-05	6e-05	6e-05	6e-05	2e-05	4e-05	2e-05	3e-05	6e-05	4e-05	5e-05	2e-05	6e-05	0.00051	0	0	4e-05	0	3e-05	5e-05	3e-05	1e-05	0	4e-05	3e-05	0.00271	0.00096	0	0	0	0	0	0	2e-05	2e-05	3e-05	5e-05	3e-05	1e-05	1e-05	0	0	0	5e-05	0	0	0	0
177972	Shuttleworthia satelles	1e-05	1e-05	0	4e-05	1e-05	0	3e-05	1e-05	1e-05	1e-05	0	1e-05	0	0	0	0	0	0	2e-05	1e-05	2e-05	2e-05	0	2e-05	1e-05	0	0	0	0	0	0	0	0	0	1e-05	1e-05	4e-05	0	1e-05	1e-05	0	0	0	0	0	0	0	0
936574	Shuttleworthia sp. MSX8B	0	1e-05	1e-05	2e-05	1e-05	2e-05	1e-05	0	3e-05	0	3e-05	1e-05	0	0	0	0	0	0	3e-05	1e-05	1e-05	2e-05	0	2e-05	4e-05	0	0	0	0	0	0	0	0	1e-05	2e-05	1e-05	1e-05	1e-05	0.00013	1e-05	0	0	0	0	0	0	0	0
1653434	Sellimonas intestinalis	3e-05	4e-05	9e-05	3e-05	8e-05	0.00012	5e-05	0.00058	0.00137	0.00034	0.00016	0.0005	0	0	0	0	0	0	0.00077	6e-05	0.00014	0.00017	0	3e-05	0.00014	0	0	0	0	0	0	0	0	0.00016	0.00018	0.00015	3e-05	0.00015	0.00682	1e-05	0	0	0	0	0	0	0	0
264463	Anaerosporobacter mobilis	1e-05	1e-05	1e-05	3e-05	1e-05	2e-05	0	1e-05	1e-05	0	2e-05	1e-05	0	2e-05	0	0	0	0	0	1e-05	1e-05	0	0	0	1e-05	0	0	0	0	0	0	0	0	1e-05	1e-05	1e-05	3e-05	0	1e-05	0	0	0	0	0	0	0	0	0
1763509	Lachnotalea glycerini	1e-05	1e-05	1e-05	0.00011	1e-05	1e-05	1e-05	1e-05	1e-05	0	1e-05	0	0	4e-05	0	0	0	0	1e-05	1e-05	1e-05	0	0	1e-05	3e-05	0.00014	0	0	0.0001	4e-05	0	2e-05	5e-05	0	1e-05	1e-05	0.0001	1e-05	0	0	0	0	2e-05	3e-05	0	0	0	2e-05
140626	Lachnobacterium bovis	1e-05	2e-05	2e-05	0.00017	2e-05	1e-05	1e-05	1e-05	1e-05	1e-05	1e-05	2e-05	0.0001	6e-05	0	0	0.00025	3e-05	1e-05	2e-05	1e-05	1e-05	0	1e-05	2e-05	0	5e-05	0.00031	0.00019	2e-05	0	4e-05	2e-05	1e-05	1e-05	2e-05	0.00016	1e-05	1e-05	1e-05	5e-05	0	2e-05	9e-05	0	7e-05	2e-05	4e-05
1432052	Eisenbergiella tayi	1e-05	1e-05	5e-05	5e-05	7e-05	3e-05	1e-05	7e-05	2e-05	5e-05	2e-05	7e-05	0	0	0	0	0	0	1e-05	1e-05	4e-05	3e-05	0	2e-05	1e-05	0	0	0	0	0	0	0	0	1e-05	7e-05	0.00304	4e-05	1e-05	0.04462	1e-05	0	0	0	0	0	0	0	0
43997	Catonella morbi	1e-05	1e-05	2e-05	5e-05	2e-05	2e-05	1e-05	1e-05	2e-05	2e-05	2e-05	1e-05	6e-05	0.00015	6e-05	0.00016	4e-05	8e-05	1e-05	1e-05	2e-05	1e-05	0	3e-05	2e-05	0	3e-05	3e-05	0.0002	6e-05	0	2e-05	0.00032	2e-05	1e-05	3e-05	5e-05	1e-05	1e-05	1e-05	0.00059	4e-05	5e-05	2e-05	3e-05	3e-05	4e-05	0.00024
1658108	Niameybacter massiliensis	0	0	0	2e-05	0	0	0	0	0	0	0	0	0.0001	0	0	0.00015	0.00014	5e-05	0	0	0	0	0	0	0	6e-05	7e-05	0.00021	0.00048	0.00011	0.00011	2e-05	3e-05	0	0	0	2e-05	0	0	0	0.0001	4e-05	6e-05	6e-05	0	0	0	0.00019
1679721	Herbinix luporum	0	0	1e-05	6e-05	0	1e-05	0	0	1e-05	0	1e-05	0	9e-05	2e-05	2e-05	0.00012	0	3e-05	0	0	0	0	0	0	0	2e-05	3e-05	3e-05	5e-05	2e-05	3e-05	0	8e-05	0	1e-05	1e-05	6e-05	0	0	0	0.00011	8e-05	1e-05	0	3e-05	4e-05	9e-05	0.00012
853	Faecalibacterium prausnitzii	0.0617	0.05104	0.06465	0.03172	0.06514	0.09396	0.11005	0.09506	0.10727	0.04882	0.09249	0.10404	0.0288	0.02117	0.01967	0.00586	0.00607	0.06451	0.25648	0.05935	0.08692	0.08481	0	0.09789	0.13955	0.04124	0.07824	0.04622	0.00103	0.07723	0.12177	0.08907	0.04607	0.12058	0.09303	0.06038	0.04194	0.02976	0.00455	0.13575	0.00018	0.04347	0.06852	0.03731	0.01182	0.09772	0.05366	0.01472
1262898	Faecalibacterium sp. CAG:82	0.00232	0.00295	0.00288	0.00165	0.00364	0.00476	0.00322	0.00079	0.00024	0.00023	0.0057	0.00282	0	0	0	0	0	0	0.00115	0.00123	0.00059	0.00203	0	0.00239	0.00112	0	0	0	0	0	0	0	0	0.01977	0.01122	0.00533	0.00144	0.00022	6e-05	0.00457	0	0	0	0	0	0	0	0
259315	uncultured Faecalibacterium sp.	0.00247	0.00215	0.00093	0.00138	0.00238	0.00229	0.00492	0.00524	0.00055	0.00382	0.00242	0.00615	0	0	0	0	5e-05	0	0.00076	0.00154	0.00746	0.0057	0	0.00138	0.00625	0	0	0	0	0	0	0	0	0.00031	0.0093	0.00433	0.00116	0.00012	9e-05	0.01208	0	0	0	0	0	0	0	0
1262897	Faecalibacterium sp. CAG:74	1e-05	2e-05	0.00181	0.00182	6e-05	0.00051	0.00074	0.00216	4e-05	0.00701	0.00054	8e-05	0	0	0	0	0	0	0.00011	3e-05	4e-05	0.00019	0	0.00074	0.0001	0	0	0	0	0	0	0	0	2e-05	4e-05	0.04741	0.0017	2e-05	5e-05	0.00175	0	0	0	0	0	0	0	0
1262896	Faecalibacterium sp. CAG:1138	0	0	0	0	1e-05	0	1e-05	0	0	0	0	0	0	0	0	0	0	0	0	0	0	0	0	0	0	0	0	0	0	0	0	0	0	0	0	1e-05	1e-05	0	1e-05	0	0	0	0	0	0	0	0	0
1946503	Faecalibacterium sp. UBA1360	0.00016	0.00027	0.00017	0.00016	0.00038	0.00021	0.00031	5e-05	0.00048	0.00023	0.00029	0.00093	0	0	0	0	0	0	0.00367	0.00029	0.00128	0.0029	0	0.00125	0.00178	0	0	0	0	0	0	0	0	0.00026	0.00081	7e-05	0.00015	0.00044	0.00021	0.00121	0	0	0	0	0	0	0	0
1965551	Faecalibacterium sp. An122	0.00014	0.00018	0.00013	0.00044	0.00029	0.00016	0.00021	0.0003	0.00019	0.00012	0.00018	0.00022	0	0	0	2e-05	0	0	0.0006	0.00023	0.00033	0.00055	0	0.00028	0.00049	0.00013	0	0	0	0.00017	3e-05	0.00016	0	8e-05	0.0008	0.00041	0.00043	0.00011	0.00036	0.0004	0	5e-05	0	4e-05	0.00014	0.00059	0	3e-05
1965550	Faecalibacterium sp. An121	9e-05	0.00011	0.0001	0.00017	0.00018	0.00013	0.00022	0.00023	0.00014	9e-05	0.00017	0.0002	0	0	0	0	0	0	0.00052	0.00016	0.00024	0.00045	0	0.00021	0.00044	0	0	0	0	0	0	0	0	7e-05	0.00026	0.00013	0.00014	0.0001	0.0002	0.00033	0	0	0	0	0	0	0	0
1946510	Faecalibacterium sp. UBA7177	2e-05	4e-05	4e-05	9e-05	7e-05	4e-05	0.00014	4e-05	0.00013	5e-05	5e-05	0.00014	0	0	0	0	0	0	0.00036	4e-05	0.00014	0.00032	0	0.00014	0.00021	3e-05	0	0	0	0	0	0	0	5e-05	0.00011	0.00014	9e-05	0.0001	0.00022	0.00021	0	0	0	0	0	0	0	0
1946507	Faecalibacterium sp. UBA1819	1e-05	2e-05	2e-05	4e-05	4e-05	3e-05	4e-05	3e-05	3e-05	2e-05	2e-05	5e-05	0	0	0	0	0	0	0.00022	2e-05	7e-05	0.00018	0	8e-05	0.0001	0	0	0	5e-05	0	0	0	0	2e-05	7e-05	2e-05	4e-05	1e-05	0.00028	7e-05	0	0	0	0	0	0	0	0
1946505	Faecalibacterium sp. UBA1762	1e-05	1e-05	1e-05	2e-05	3e-05	1e-05	3e-05	1e-05	1e-05	1e-05	1e-05	3e-05	0	0	0	0	0	0	0.0001	1e-05	4e-05	7e-05	0	4e-05	4e-05	0	0	0	0	0	0	0	0	1e-05	4e-05	1e-05	3e-05	1e-05	3e-05	4e-05	0	0	0	0	0	0	0	0
1946506	Faecalibacterium sp. UBA1771	0	0	0	1e-05	0	0	1e-05	0	0	0	0	0	0	0	0	0	0	0	1e-05	0	0	1e-05	0	1e-05	1e-05	0	0	0	0	0	0	0	0	0	0	0	1e-05	0	1e-05	0	0	0	0	0	0	0	0	0
165186	uncultured Ruminococcus sp.	0.04311	0.03824	0.02098	0.00858	0.03447	0.05308	0.01479	0.08254	0.01171	0.0615	0.04462	0.01171	0.00259	0.04054	0.00677	0.01968	0.00911	0.01644	0.00881	0.05617	0.05981	0.01289	0.05365	0.01965	0.00801	0.00517	0.00358	0.00225	0.00152	0.0748	0.00282	0.0549	0.02512	0.00207	0.01288	0.00694	0.06447	0.00273	0.00697	0.00371	0.00422	0.0353	0.00465	0.05759	0.082	0.01103	0.09399	0.02618
1262953	Ruminococcus sp. CAG:254	2e-05	0.00187	3e-05	0.00013	6e-05	2e-05	1e-05	0.00795	0	2e-05	2e-05	0.00047	0	0	0	0	0	0	2e-05	0.00639	3e-05	0.00031	0	0.00238	4e-05	0	0	0	0	0	0	0	0	0	2e-05	2e-05	0.00029	0	1e-05	1e-05	0	0	0	0	0	0	0	0
1262963	Ruminococcus sp. CAG:579	1e-05	0.0001	9e-05	0.00021	0.00022	6e-05	6e-05	0.0003	1e-05	4e-05	5e-05	2e-05	0	0	0	0	0	0	1e-05	0.00015	5e-05	3e-05	0	5e-05	1e-05	0	0	0	0	0	0	0	0	0	4e-05	5e-05	0.00027	0	2e-05	8e-05	0	0	0	0	0	0	0	0
1262958	Ruminococcus sp. CAG:403	0	1e-05	5e-05	3e-05	0.00012	5e-05	2e-05	3e-05	1e-05	0.0001	4e-05	1e-05	0	0	0	0	0	0	1e-05	2e-05	2e-05	1e-05	0	7e-05	1e-05	0	0	0	0	0	0	0	0	0	0	2e-05	3e-05	0	3e-05	1e-05	0	0	0	0	0	0	0	0
1262952	Ruminococcus sp. CAG:177	0	1e-05	1e-05	0.00224	0.00064	1e-05	4e-05	1e-05	3e-05	1e-05	0	0.02365	0	0	0	0	0	0	0.03652	1e-05	1e-05	0.03957	0	0.01424	0	0	0	0	0	0	0	0	0	1e-05	1e-05	7e-05	0.00465	4e-05	2e-05	2e-05	0	0	0	0	0	0	0	0
1262966	Ruminococcus sp. CAG:724	0	0	1e-05	0.00058	2e-05	1e-05	4e-05	1e-05	1e-05	1e-05	1e-05	0	0	0	0	0	0	0	1e-05	0	0	1e-05	0	3e-05	0	0	0	0	0	0	0	0	0	0	2e-05	2e-05	0.00038	0	1e-05	1e-05	0	0	0	0	0	0	0	0
1262954	Ruminococcus sp. CAG:330	0	1e-05	9e-05	6e-05	8e-05	4e-05	4e-05	4e-05	1e-05	0.00015	4e-05	1e-05	0	0	0	0	0	0	3e-05	3e-05	8e-05	4e-05	0	7e-05	1e-05	0	0	0	0	0	0	0	0	1e-05	2e-05	3e-05	8e-05	1e-05	2e-05	4e-05	0	0	0	0	0	0	0	0
1262957	Ruminococcus sp. CAG:382	0	0	1e-05	0.00071	0.0006	1e-05	0.00077	1e-05	1e-05	1e-05	1e-05	1e-05	0	0	0	0	0	0	3e-05	0	1e-05	5e-05	0	5e-05	2e-05	0	0	0	0	0	0	0	0	0	1e-05	2e-05	0.00108	0	2e-05	2e-05	0	0	0	0	0	0	0	0
1262961	Ruminococcus sp. CAG:563	0	0	1e-05	0.00092	1e-05	1e-05	4e-05	4e-05	1e-05	1e-05	1e-05	2e-05	0	0	0	0	0	0	1e-05	0	1e-05	3e-05	0	0.00011	3e-05	0	0	0	0	0	0	0	0	0	1e-05	2e-05	0.00094	0	2e-05	1e-05	0	0	0	0	0.00036	0	0	0
1262959	Ruminococcus sp. CAG:488	0	0	0	0.01533	2e-05	1e-05	2e-05	1e-05	0	1e-05	1e-05	1e-05	0	0	0	0	0	0	1e-05	0	0	2e-05	0	0.00011	1e-05	0	0	0	0	0	0	0	0	0	1e-05	1e-05	0.01527	0	2e-05	1e-05	0	0	0	0	0	0	0	0
457412	Ruminococcus sp. 5_1_39BFAA	0.01371	0.00816	0.00171	0.00047	0.00306	0.00477	0.00227	0.01335	0.00317	0.00161	0.00656	0.00123	0.00301	0.00967	0.0009	0.10943	0.01329	0.11136	0.00128	0.0223	0.0069	0.00095	0	0.00191	0.01072	0.01004	0.00788	0.25448	0.24869	0.01647	0.00774	0.01423	0.00184	0.00197	0.00625	0.00067	0.00038	0.00294	0.00028	0.00049	0.15664	0.00395	0.00781	0.04689	0.00076	0.01049	0.01038	0.13134
1095771	Ruminococcus sp. JC304	0.0018	0.00145	0.00046	0.00048	0.00075	0.00117	0.00065	0.00432	0.00113	0.00067	0.00157	0.00034	0	0	0	0	0.00011	0	0.0004	0.003	0.00166	0.00032	0	0.00181	0.00113	4e-05	0	0	0	0	0	0	0	0.00047	0.00075	0.00041	0.00038	0.00079	0.00015	0.00026	0	0	2e-05	0	5e-05	0	0	0
46228	Ruminococcus lactaris	0.00067	0.00054	0.01641	0.00034	0.02805	0.01434	0.00135	0.00076	0.02516	0.0049	0.0101	0.00054	0.00191	0.00054	0.00282	5e-05	0.00042	0.00175	0.00154	0.0006	0.01869	0.00044	0	0.00032	0.00829	2e-05	0.00034	0	0	0.00137	0	0.0042	0.00485	0.00099	0.00026	0.0078	0.00025	0.0041	0.01293	0.00107	0	0.00201	0.00183	0.00102	0.00021	7e-05	0.00032	0
1638786	Ruminococcus sp. UNK.MGS-30	8e-05	0.00011	0.00084	0.00019	0.02121	0.00037	0.00012	0.00044	5e-05	0.00118	0.00042	0.0001	0	0	0	0	6e-05	0	0.00012	0.00036	0.00355	0.00011	0.04505	0.00693	9e-05	0	0	0	0	0	0	0	0	1e-05	5e-05	0.00023	0.00027	2e-05	3e-05	0.0001	0	0	0.00031	0	0	0.00061	0.00036	0
40518	Ruminococcus bromii	4e-05	0.00014	0.00225	0.00034	0.00129	0.00968	0.00218	0.01601	3e-05	0.00758	0.00585	0.00087	0	0	0	0	0	0	0.00145	0.00032	0.01062	0.00054	0	0.00194	0.00028	0	0	0	0	0	0	0	0	2e-05	0.00053	0.00122	0.00026	1e-05	0.00145	0.00025	0	0	0	0	8e-05	0	0	0
1265	Ruminococcus flavefaciens	3e-05	8e-05	0.00049	0.00123	0.00064	0.00031	0.00045	0.00018	7e-05	0.00041	0.00029	7e-05	0	2e-05	0	0	0.00027	0.00028	0.00011	0.00027	0.00016	0.00013	0	0.00052	7e-05	0	0	0	0.00037	0.00293	2e-05	0.00058	0.00011	6e-05	0.00012	0.00013	0.00273	3e-05	0.00029	0.0001	0.00062	4e-05	0.0003	0.00097	0.00012	8e-05	0.00065	0.00043
1160721	Ruminococcus bicirculans	3e-05	0.00067	0.00608	0.00017	0.01306	0.00406	0.00015	0.00524	1e-05	0.00566	0.00299	0.00031	0	0.00016	0	0	0.00022	0	0.00022	0.0077	0.00738	0.00055	0.022	0.00279	0.00041	0	0	0	0.00053	0.08738	0.00095	0.00749	0	0	0.00019	7e-05	0.00045	0	6e-05	5e-05	0.01559	0	0.0127	0.02337	0	0.00525	0.0995	0.0002
1264	Ruminococcus albus	1e-05	3e-05	0.00017	0.00032	0.0003	0.00011	8e-05	0.0001	4e-05	0.00012	0.0001	4e-05	0	0	0	0	0	3e-05	6e-05	0.00018	0.00013	7e-05	0	0.00018	4e-05	0	0	0	0	0.00027	0	0	0	1e-05	4e-05	4e-05	0.00026	2e-05	9e-05	4e-05	0	0	0	3e-05	0	0	0.00026	3e-05
40519	Ruminococcus callidus	1e-05	7e-05	0.01453	0.00057	0.00125	0.006	0.00121	0.00021	4e-05	0.02931	0.00715	0.00012	0	0	0	0	0	0	0.00217	0.00026	0.00023	0.00013	0	0.0005	5e-05	0	0	0	0	0	0	0	0	3e-05	5e-05	0.00353	0.00025	1e-05	3e-05	0.00193	0	0	0	0	0	0	0	0
438033	Ruminococcus gauvreauii	1e-05	1e-05	2e-05	3e-05	2e-05	3e-05	2e-05	3e-05	2e-05	1e-05	3e-05	1e-05	0	0	0	0	0	0	1e-05	2e-05	2e-05	2e-05	0	3e-05	1e-05	0	0	0	0	0	0	0	0	2e-05	3e-05	3e-05	3e-05	0	0.00042	1e-05	0	0	0	0	0	0	0	0
1930000	Ruminococcus sp. Phil15	1e-05	1e-05	2e-05	5e-05	6e-05	1e-05	0.00012	3e-05	1e-05	2e-05	2e-05	1e-05	0	0	0	0	0	0	1e-05	1e-05	5e-05	2e-05	0	5e-05	0.00018	0	0	0	0	0	0	0	0	1e-05	1e-05	0.00013	6e-05	0	0.0001	3e-05	0	0	0	0	0	0	0	0
1410617	Ruminococcus sp. FC2018	0	0	1e-05	3e-05	2e-05	1e-05	1e-05	1e-05	1e-05	1e-05	1e-05	0	0	0	0	0	0	0	0	1e-05	1e-05	1e-05	0	4e-05	1e-05	0	0	0	0	0	0	0	0	0	0	1e-05	5e-05	1e-05	2e-05	1e-05	0	0	0	0	0	0	0	0
1514668	Ruminococcus sp. HUN007	0	0	1e-05	3e-05	2e-05	1e-05	2e-05	2e-05	0	1e-05	1e-05	1e-05	0	0	0	0	0	0	0	1e-05	1e-05	1e-05	0	2e-05	1e-05	0	0	0	0	0	0	0	0	0	0	1e-05	4e-05	0	2e-05	1e-05	0	0	0	0	0	0	0	0
244362	Ruminococcus sp. YE71	0	1e-05	3e-05	5e-05	5e-05	2e-05	4e-05	1e-05	1e-05	6e-05	2e-05	1e-05	0	0	0	0.00033	0.00164	0.00026	3e-05	2e-05	2e-05	2e-05	0	3e-05	1e-05	0.0008	9e-05	0.00048	0	0.00037	0.00037	0	0.00035	0	1e-05	2e-05	8e-05	0	3e-05	2e-05	0	0.00012	0.00155	8e-05	0.00011	0.00308	0.00159	0
1947433	Ruminococcus sp. UBA6407	0	1e-05	1e-05	0.01703	2e-05	1e-05	1e-05	1e-05	1e-05	1e-05	1e-05	0	0	0	0	0	0	0	0	2e-05	1e-05	0	0	2e-05	0	0	0	0	0	0	0	0	0	1e-05	0	1e-05	0.00029	0	2e-05	1e-05	0	0	0	0	0	0	0	0
1947423	Ruminococcus sp. UBA4275	0	0	1e-05	3e-05	2e-05	1e-05	3e-05	1e-05	2e-05	1e-05	1e-05	1e-05	0	0	0	0	0	0	2e-05	0	1e-05	3e-05	0	1e-05	2e-05	0	0	0	0	0	0	0	0	0	1e-05	1e-05	3e-05	1e-05	3e-05	3e-05	0	0	0	0	0	0	0	0
1161942	Ruminococcus champanellensis	0	3e-05	6e-05	0.00083	0.00016	4e-05	0.00019	0.00031	9e-05	6e-05	4e-05	4e-05	0	0	0	0	0	0.00071	4e-05	7e-05	4e-05	8e-05	0	8e-05	3e-05	0	0	0	0	0	0.00048	0	0	1e-05	4e-05	0.00017	0.00077	1e-05	0.00012	6e-05	0	0	0.0029	0.00094	0.00097	0	0	0
1947404	Ruminococcus sp. UBA1394	0	1e-05	1e-05	2e-05	2e-05	1e-05	1e-05	1e-05	0	1e-05	1e-05	0	0	0	0	0	0	0	0	1e-05	1e-05	1e-05	0	3e-05	1e-05	0	0	0	0	0	0	0	0	0	1e-05	3e-05	4e-05	0	0.0001	0	0	0	0	0	0	0	0	0
1947406	Ruminococcus sp. UBA1780	0	0	0	1e-05	0	0	1e-05	0	0	0	0	0	0	0	0	0	0	0	0	0	0	0	0	2e-05	0	0	0	0	0	0	0	0	0	0	0	1e-05	3e-05	0	1e-05	0	0	0	0	0	0	0	0	0
1947414	Ruminococcus sp. UBA3387	0	0	1e-05	3e-05	1e-05	1e-05	0	1e-05	0	1e-05	1e-05	0	0	0	0	0	0	0	1e-05	1e-05	1e-05	1e-05	0	1e-05	1e-05	0	0	0	0	0	0	0	0	0	0	1e-05	2e-05	0	1e-05	0	0	0	0	0	0	0	0	0
1947427	Ruminococcus sp. UBA4350	0	0	1e-05	3e-05	2e-05	0	3e-05	1e-05	2e-05	0	1e-05	1e-05	0	0	0	0	0	0	2e-05	0	1e-05	3e-05	0	2e-05	1e-05	0	0	0	0	0	0	0	0	1e-05	1e-05	1e-05	3e-05	1e-05	2e-05	3e-05	0	0	0	0	0	0	0	0
1947405	Ruminococcus sp. UBA1409	0	0	1e-05	1e-05	1e-05	1e-05	2e-05	1e-05	1e-05	3e-05	1e-05	1e-05	0	0	0	0	0	0	0	1e-05	1e-05	1e-05	0	3e-05	3e-05	0	0	0	0	0	0	0	0	1e-05	1e-05	2e-05	2e-05	0	4e-05	1e-05	0	0	0	0	0	0	0	0
1947415	Ruminococcus sp. UBA3665	0	0	0	1e-05	1e-05	0	1e-05	0	1e-05	0	0	1e-05	0	0	0	0	0	0	2e-05	0	1e-05	1e-05	0	1e-05	1e-05	0	0	0	0	0	0	0	0	0	0	0	1e-05	0	1e-05	1e-05	0	0	0	0	0	0	0	0
1947411	Ruminococcus sp. UBA3280	0	0	0	3e-05	1e-05	0	1e-05	0	0	1e-05	0	1e-05	0	0	0	0	0	0	0	0	0	0	0	3e-05	0	0	0	0	0	0	0	0	0	0	0	1e-05	8e-05	0	2e-05	0	0	0	0	0	0	0	0	0
1947434	Ruminococcus sp. UBA7013	0	0	0	2e-05	0	0	0	0	1e-05	0	0	0	0	0	0	0	0	0	0	0	0	0	0	0	0	0	0	0	0	0	0	0	0	0	0	0	2e-05	0	1e-05	0	0	0	0	0	0	0	0	0
1947425	Ruminococcus sp. UBA4321	0	0	0	1e-05	0	0	0	1e-05	0	0	1e-05	0	0	0	0	0	0	0	0	0	1e-05	0	0	1e-05	0	0	0	0	0	0	0	0	0	0	1e-05	0	1e-05	0	0	0	0	0	0	0	0	0	0	0
1929998	Ruminococcus sp. Phil11	0	1e-05	1e-05	0.0001	2e-05	0	4e-05	1e-05	3e-05	1e-05	1e-05	2e-05	0	0	0	0	0	0	2e-05	1e-05	1e-05	5e-05	0	2e-05	1e-05	0	0	0	0	0	0	0	0	1e-05	1e-05	1e-05	6e-05	1e-05	2e-05	4e-05	0	0	0	0	0	0	0	0
1947403	Ruminococcus sp. UBA1366	0	0	0	1e-05	1e-05	0	1e-05	0	1e-05	1e-05	0	0	0	0	0	0	0	0	2e-05	0	1e-05	2e-05	0	1e-05	1e-05	0	0	0	0	0	0	0	0	0	1e-05	1e-05	1e-05	0	2e-05	1e-05	0	0	0	0	0	0	0	0
1947429	Ruminococcus sp. UBA4385	0	1e-05	1e-05	2e-05	1e-05	1e-05	1e-05	1e-05	1e-05	1e-05	1e-05	1e-05	0	0	0	0	0	0	1e-05	1e-05	1e-05	0	0	2e-05	1e-05	0	0	0	0	0	0	0	0	0	0	0	2e-05	0	0	0	0	0	0	0	0	0	0	0
1947422	Ruminococcus sp. UBA4240	0	0	1e-05	2e-05	1e-05	0	2e-05	0	0	0	0	0	0	0	0	0	0	0	1e-05	0	1e-05	1e-05	0	2e-05	0	0	0	0	0	0	0	0	0	0	1e-05	1e-05	3e-05	0	2e-05	1e-05	0	0	0	0	0	0	0	0
1930004	Ruminococcus sp. Zagget11	0	0	0	2e-05	1e-05	0	1e-05	0	0	0	0	0	0	0	0	0	0	0	0	0	1e-05	0	0	5e-05	0	0	0	0	0	0	0	0	0	0	1e-05	1e-05	4e-05	0	3e-05	0	0	0	0	0	0	0	0	0
1947442	Ruminococcus sp. UBA946	0	0	0	1e-05	0	0	1e-05	0	0	0	0	1e-05	0	0	0	0	0	0	0	0	0	1e-05	0	1e-05	0	0	0	0	0	0	0	0	0	0	0	0	1e-05	0	1e-05	0	0	0	0	0	0	0	0	0
1947440	Ruminococcus sp. UBA7477	0	0	2e-05	3e-05	2e-05	1e-05	1e-05	1e-05	0	1e-05	1e-05	0	0	0	0	0	0	0	0	1e-05	1e-05	1e-05	0	2e-05	0	0	0	0	0	0	0	0	0	0	0	1e-05	3e-05	0	0.00011	1e-05	0	0	0	0	0	0	0	0
1947436	Ruminococcus sp. UBA7158	0	0	0	2e-05	1e-05	0	2e-05	0	1e-05	1e-05	0	0	0	0	0	0	0	0	1e-05	0	2e-05	1e-05	0	4e-05	0	0	0	0	0	0	0	0	0	0	1e-05	1e-05	3e-05	0	2e-05	1e-05	0	0	0	0	0	0	0	0
877411	Ruminococcus sp. NK3A76	0	0	4e-05	4e-05	5e-05	2e-05	2e-05	1e-05	0	3e-05	2e-05	0	0	0	0	0	0	0	0	2e-05	2e-05	1e-05	0	1e-05	0	0	0	0	0	0	0	0	0	0	0	1e-05	5e-05	0	2e-05	1e-05	0	0	0	0	0	0	0	0
1947424	Ruminococcus sp. UBA4310	0	0	0	3e-05	1e-05	0	2e-05	0	0	1e-05	0	1e-05	0	0	0	0	0	0	1e-05	1e-05	1e-05	1e-05	0	1e-05	1e-05	0	0	0	0	0	0	0	0	0	0	1e-05	8e-05	0	1e-05	1e-05	0	0	0	0	0	0	0	0
1947421	Ruminococcus sp. UBA3855	0	0	1e-05	1e-05	1e-05	1e-05	1e-05	0	0	0	0	0	0	0	0	0	0	0	1e-05	0	1e-05	1e-05	0	1e-05	0	0	0	0	0	0	0	0	0	0	0	0	1e-05	0	1e-05	0	0	0	0	0	0	0	0	0
1947419	Ruminococcus sp. UBA3800	0	0	1e-05	1e-05	1e-05	0	1e-05	1e-05	0	1e-05	0	0	0	0	0	0	0	0	0	1e-05	2e-05	1e-05	0	1e-05	0	0	0	0	0	0	0	0	0	0	0	0	2e-05	0	1e-05	1e-05	0	0	0	0	0	0	0	0
1947418	Ruminococcus sp. UBA3767	0	0	0	3e-05	0	0	0	2e-05	0	0	0	0	0	0	0	0	0	0	0	0	1e-05	2e-05	0	1e-05	0	0	0	0	0	0	0	0	0	0	0	0	1e-05	0	1e-05	0	0	0	0	0	0	0	0	0
745368	Gemmiger formicilis	0.01074	0.0282	0.01027	0.00136	0.00449	0.01218	0.01133	0.00038	0.01883	0.00782	0.00939	0.02834	0	0	0	0	0	0	0.01831	0.02112	0.01007	0.05896	0.02706	0.01906	0.06196	0	0	0	0	5e-05	0	0	0	0.05131	0.03026	0.00344	0.00227	0.01552	0.00017	0.05245	0	0	0	0	0	0	0	0
1965639	Gemmiger sp. An50	7e-05	8e-05	6e-05	0.00014	0.00019	6e-05	0.00028	0.00046	0.0001	9e-05	7e-05	0.0001	0	0	0	0	0	0	0.00047	7e-05	0.00041	0.00035	0	0.00032	0.00065	0.00034	0	0	0	0	0	0	0	5e-05	0.00029	0.00017	9e-05	6e-05	0.00093	0.00023	0	0	0	0	0	0.00034	0	0
1965549	Gemmiger sp. An120	3e-05	5e-05	7e-05	0.00017	0.00016	8e-05	0.00023	0.0001	0.00012	0.00011	9e-05	0.0002	0	0	0	2e-05	0	0.00138	0.00066	6e-05	0.00027	0.0006	0	0.00025	0.00039	0	0	0	5e-05	0.0001	0	0.00048	4e-05	8e-05	0.00021	6e-05	0.00025	8e-05	0.00064	0.00043	6e-05	7e-05	2e-05	0.00068	0.00138	0.0002	0.00016	0
1965582	Gemmiger sp. An194	2e-05	3e-05	3e-05	9e-05	6e-05	3e-05	0.00011	3e-05	0.0001	3e-05	4e-05	0.00011	0	0	0	0	0	0	0.00031	3e-05	0.00014	0.00028	0	0.00012	0.00018	0	0	0	0	0	0	0	0	5e-05	8e-05	3e-05	8e-05	8e-05	0.00014	0.0002	0	0	0	0	0	0	0	0
1965662	Gemmiger sp. An87	1e-05	3e-05	5e-05	8e-05	9e-05	4e-05	0.00011	0.00014	9e-05	6e-05	5e-05	8e-05	0	0	0	0	0	0	0.00023	4e-05	0.00014	0.00023	0	0.00013	0.00024	0	0	0	0	0	0	0	0	2e-05	0.00014	0.00012	7e-05	4e-05	0.00034	0.00016	0	0	0	0	0	0	0	0
1193534	uncultured Flavonifractor sp.	0.0008	0.00085	0.00074	0.0025	0.00587	0.00049	0.00201	0.01539	0.00263	0.00204	0.00057	0.00119	0.00012	0.00166	0.00082	0	0	0	0.00347	0.00069	0.00162	0.00134	0	0.00105	0.00298	0.00053	0.00117	0	0	0.0022	0.00422	0.00021	0.00023	0.01612	0.00545	0.0046	0.00378	0.00598	0.00767	0.00156	0.00016	0.00013	0.00118	0.00071	0.00522	0	0.00077	0
292800	Flavonifractor plautii	0.00038	0.00084	0.0012	0.00024	0.00133	0.0007	0.00054	0.00361	0.00285	0.00053	0.00032	0.00113	5e-05	6e-05	7e-05	0	0.00015	0.0003	0.0036	0.00094	0.00255	0.00081	0	0.00038	0.00055	5e-05	3e-05	6e-05	0.0003	0.00048	5e-05	0.00048	0.00015	0.00638	0.00078	0.00117	0.00028	0.00179	0.0031	0.00044	5e-05	4e-05	2e-05	0.00054	0.02409	0.00019	0.00256	0
1965538	Flavonifractor sp. An100	8e-05	7e-05	0.0001	0.00018	0.00017	5e-05	0.00018	0.00015	4e-05	9e-05	5e-05	0.00014	0	0	0	0	0	0	0.00011	4e-05	0.00015	0.00021	0	8e-05	0.00011	0.00016	0	0	0	0	0	0	0	3e-05	0.00016	0.00013	0.0002	2e-05	0.00068	0.00011	0	0.00034	4e-05	0	0	0	0	0
1965629	Flavonifractor sp. An306	4e-05	7e-05	0.0001	0.00019	0.00034	8e-05	0.00032	0.00028	0.00015	0.00011	9e-05	0.00015	0	0	0	0	0	0	0.00014	6e-05	0.00066	0.00031	0	0.00014	0.00028	0	0	0	0	0	0	0	0	7e-05	0.00022	0.00025	0.00019	5e-05	0.00119	0.00014	0	0	0	0	0	0	0	0
1965537	Flavonifractor sp. An10	3e-05	4e-05	0.00012	0.00023	0.00029	8e-05	0.00042	0.00027	7e-05	8e-05	7e-05	9e-05	0	0	0	0	0	0	9e-05	4e-05	0.00079	0.0002	0	0.00011	0.00016	0	0	0	0	0	0	0	0	8e-05	0.00021	0.00019	0.00022	2e-05	0.00392	0.00015	0	0	0	0	0	0	0	0
1965666	Flavonifractor sp. An92	3e-05	4e-05	8e-05	0.00021	0.00027	7e-05	0.00031	0.00018	4e-05	0.0001	6e-05	6e-05	0	0	0	0	0	0	7e-05	5e-05	0.00013	0.00015	0	0.00011	8e-05	0	4e-05	0	0	0	0	0	0	4e-05	0.00018	0.00014	0.00032	2e-05	0.00059	0.00021	0	0	0	0	0	0	0	0
1965665	Flavonifractor sp. An91	4e-05	7e-05	0.00012	0.00025	0.00025	7e-05	0.00034	0.00024	6e-05	6e-05	6e-05	0.00012	0	0	0	0	0	0	5e-05	9e-05	0.00045	0.00027	0	0.00014	0.00021	0	0	0	0	0	0	0	0	6e-05	0.00026	0.00021	0.00019	1e-05	0.00097	0.00017	0	0	0	0	0	0	0	0
1965660	Flavonifractor sp. An82	1e-05	3e-05	8e-05	0.00016	0.00018	6e-05	0.00019	9e-05	7e-05	7e-05	6e-05	6e-05	0	0	0	0	0	0	6e-05	2e-05	0.00031	0.00018	0	7e-05	0.00014	0	0	0	0	0	0	0	0	9e-05	0.00015	0.00014	0.00014	2e-05	0.00108	0.0001	0	0	6e-05	0	0	0	0	0
1965664	Flavonifractor sp. An9	1e-05	2e-05	9e-05	9e-05	0.00024	5e-05	0.00022	0.00012	4e-05	7e-05	5e-05	8e-05	0	0	0	0	0	0.00034	5e-05	2e-05	0.00021	0.00016	0	0.00011	0.00016	0.00034	0.00028	0	0	0	0	0.00027	0.00014	4e-05	0.00012	0.00012	9e-05	1e-05	0.00097	0.0001	0	0	0	0	0	0	0.00166	0
1965544	Flavonifractor sp. An112	1e-05	1e-05	3e-05	8e-05	7e-05	2e-05	9e-05	4e-05	2e-05	5e-05	2e-05	5e-05	0.00027	0	0.00012	7e-05	0.00034	6e-05	4e-05	1e-05	9e-05	0.00011	0	4e-05	4e-05	0	0	0	0	0	0	0	0	1e-05	4e-05	6e-05	9e-05	1e-05	0.00035	6e-05	6e-05	0	0	0.00024	0	0	0	0
552398	Ruminococcaceae bacterium D16	0.00023	0.00035	0.00055	0.00057	0.00074	0.00026	0.0004	0.00028	0.00064	0.00032	0.00039	0.00023	0	0.00037	0	0.00012	0	0.00054	0.0017	0.00029	0.00026	0.00037	0	0.00022	0.00048	6e-05	4e-05	4e-05	0.00018	0.00194	0	0.00221	0.00036	0.00024	0.00401	0.00086	0.00111	0.00037	0.00053	0.00091	0.00024	0.00033	9e-05	0.0022	0.00841	0.00016	0.00146	0.00012
1952411	Ruminococcaceae bacterium UBA6353	5e-05	0.0001	0.00026	0.00044	0.00028	0.00017	0.00052	0.00012	0.00018	0.00013	9e-05	0.00019	0	0	0	0	0	0	9e-05	9e-05	0.0001	0.00052	0	0.00021	7e-05	0	0	0	0	0	0	0	0	5e-05	7e-05	0.00043	0.00043	9e-05	0.00016	0.00034	0	0	0	0	0	0	0	0
1952288	Ruminococcaceae bacterium UBA1691	3e-05	3e-05	1e-05	3e-05	3e-05	1e-05	4e-05	3e-05	4e-05	4e-05	1e-05	2e-05	0	0	0	0	0	0	2e-05	3e-05	1e-05	3e-05	0	2e-05	1e-05	0	0	0	0	0	0	0	0	1e-05	1e-05	2e-05	3e-05	1e-05	0.0039	3e-05	0	0	0	0	0	0	0	0
1520815	Ruminococcaceae bacterium D5	1e-05	4e-05	6e-05	0.00014	0.00017	3e-05	0.00024	7e-05	4e-05	5e-05	3e-05	4e-05	0	0	0	0	0	0	3e-05	3e-05	7e-05	8e-05	0	9e-05	5e-05	0	0	0.00012	0	5e-05	0	0	0	1e-05	3e-05	0.00026	0.00014	1e-05	0.00101	0.00012	0	4e-05	0	0	0	0	0	0
1952324	Ruminococcaceae bacterium UBA3818	1e-05	1e-05	0.00011	9e-05	0.00015	9e-05	0.00033	2e-05	4e-05	0.00011	0.00011	5e-05	0	0	0	0	0	0	3e-05	2e-05	0.00013	0.00011	0	0.0002	9e-05	0	0	0	0	0	0	0	0	1e-05	0.00012	6e-05	0.0001	3e-05	0.00012	9e-05	0	0	0	0	0	0	0	0
1952283	Ruminococcaceae bacterium UBA1417	1e-05	5e-05	6e-05	4e-05	0.00013	0.00013	0.00019	3e-05	0.00062	7e-05	8e-05	5e-05	0	0	4e-05	0	0	0	5e-05	9e-05	4e-05	7e-05	0	0.0001	7e-05	0	0	0	0	0	0	0	0	0.00014	4e-05	8e-05	4e-05	8e-05	0.00023	0.00033	0	0	0	0	0	0	0	0
1952312	Ruminococcaceae bacterium UBA3220	1e-05	0	0	1e-05	0	0	2e-05	0	0	0	0	0	0	0	0	0	0	0	0	0	0	0	0	3e-05	0	0	0	0	0	0	0	0	0	0	0	0	2e-05	0	1e-05	0	0	0	0	0	0	0	0	0
1952410	Ruminococcaceae bacterium UBA5905	1e-05	1e-05	2e-05	9e-05	6e-05	1e-05	0.00017	5e-05	2e-05	5e-05	2e-05	2e-05	0	0	0	0	0	0	3e-05	1e-05	2e-05	8e-05	0	3e-05	3e-05	0	0	0	0	0	0	0	0	1e-05	3e-05	5e-05	0.0001	1e-05	7e-05	9e-05	0	0	0	0	0	0	0	0
1200751	Ruminococcaceae bacterium P7	0	1e-05	1e-05	3e-05	2e-05	2e-05	4e-05	2e-05	2e-05	1e-05	1e-05	1e-05	0	2e-05	0	0	0	0	3e-05	2e-05	2e-05	3e-05	0	2e-05	3e-05	0.00036	0	0	0	0	0	2e-05	2e-05	1e-05	6e-05	7e-05	4e-05	1e-05	0.00012	4e-05	0	4e-05	0	0	2e-05	0	0	0
1952297	Ruminococcaceae bacterium UBA1865	0	0	1e-05	1e-05	1e-05	1e-05	1e-05	1e-05	1e-05	1e-05	1e-05	1e-05	0	0	0	0	0	0	1e-05	0	1e-05	1e-05	0	2e-05	1e-05	0	0	0	0	0	0	0	0	0	1e-05	1e-05	1e-05	0	4e-05	1e-05	0	0	0	0	0	0	0	0
1952318	Ruminococcaceae bacterium UBA3451	0	0	1e-05	1e-05	1e-05	1e-05	2e-05	0	1e-05	1e-05	1e-05	1e-05	0	0	0	0	0	0	2e-05	0	1e-05	2e-05	0	2e-05	2e-05	0	0	0	0	0	0	0	0	0	1e-05	1e-05	2e-05	0	5e-05	2e-05	0	0	0	0	0	0	0	0
1572656	Ruminococcaceae bacterium CPB6	0	1e-05	1e-05	2e-05	2e-05	1e-05	2e-05	2e-05	2e-05	1e-05	1e-05	1e-05	0	0.00025	0	0	8e-05	0.0006	3e-05	1e-05	1e-05	2e-05	0	3e-05	2e-05	3e-05	5e-05	0.00012	0	0.00372	9e-05	0.00132	8e-05	1e-05	1e-05	1e-05	2e-05	1e-05	5e-05	2e-05	5e-05	0.00027	0.00015	0.00284	0.0026	0.00022	0.00248	8e-05
1852383	Ruminococcaceae bacterium Marseille-P2935	0	1e-05	2e-05	1e-05	3e-05	1e-05	7e-05	2e-05	3e-05	2e-05	2e-05	1e-05	0	0	0	0	0	0	2e-05	1e-05	4e-05	2e-05	0	4e-05	2e-05	0	0	0	0	0	0	0	0	3e-05	3e-05	4e-05	2e-05	1e-05	5e-05	2e-05	0	0	0	0	0	0	0	0
1952280	Ruminococcaceae bacterium UBA1375	0	1e-05	2e-05	3e-05	2e-05	2e-05	2e-05	1e-05	1e-05	1e-05	2e-05	2e-05	0	0	0	0	0	0	5e-05	1e-05	3e-05	5e-05	0	2e-05	4e-05	0	0	0	0	0	0	0	0	1e-05	3e-05	2e-05	3e-05	0	6e-05	3e-05	0	0	0	0	0	0	0	0
1952429	Ruminococcaceae bacterium UBA7075	0	2e-05	4e-05	3e-05	3e-05	0.00013	2e-05	0.0003	1e-05	0.00011	0.0001	1e-05	0	0	0	0	0	0	3e-05	6e-05	3e-05	2e-05	0	0.00011	1e-05	0	0	0	0	0	0	0	0	0	0.00011	0.00023	3e-05	0	0.00125	1e-05	0	0	0	0	0	0	0	0
1520819	Ruminococcaceae bacterium YRB3002	0	0	0	1e-05	1e-05	0	1e-05	0	0	0	1e-05	0	0	0	0	0	0	0	1e-05	0	0	1e-05	0	1e-05	0	0	0	0	0	0	0	0	0	0	0	0	1e-05	0	0	1e-05	0	0	0	0	0	0	0	0
1952282	Ruminococcaceae bacterium UBA1405	0	1e-05	2e-05	7e-05	7e-05	1e-05	8e-05	6e-05	2e-05	2e-05	2e-05	5e-05	0	0	0	0	0	0	4e-05	1e-05	4e-05	0.00011	0	4e-05	6e-05	0	0	0	0	0	0	0	0	1e-05	6e-05	5e-05	6e-05	2e-05	0.00022	4e-05	0	0	0	0	0	0	0	0
1952355	Ruminococcaceae bacterium UBA4937	0	0	1e-05	2e-05	2e-05	1e-05	3e-05	1e-05	4e-05	1e-05	1e-05	0	0	0	0	0	0	0	2e-05	1e-05	1e-05	3e-05	0	2e-05	4e-05	0	0	0	0	0	0	0	0	1e-05	1e-05	1e-05	2e-05	1e-05	6e-05	5e-05	0	0	0	0	0	0	0	0
1952418	Ruminococcaceae bacterium UBA6439	1e-05	2e-05	1e-05	3e-05	4e-05	1e-05	5e-05	3e-05	2e-05	0	0	0.00025	0	0	0	0	0	0	0.00032	2e-05	0	0.00039	0	6e-05	3e-05	0	0	0	0	0	0	0	0	0	3e-05	1e-05	7e-05	0	2e-05	1e-05	0	0	0	0	0	0	0	0
1952304	Ruminococcaceae bacterium UBA2851	0	0	1e-05	1e-05	1e-05	0	1e-05	0	1e-05	0	1e-05	0	0	0	0	0	0	0	1e-05	0	1e-05	1e-05	0	2e-05	0	0	0	0	0	0	0	0	0	0	0	1e-05	2e-05	0	7e-05	1e-05	0	0	0	0	0	0	0	0
1952428	Ruminococcaceae bacterium UBA7067	0	1e-05	2e-05	3e-05	3e-05	3e-05	2e-05	1e-05	1e-05	1e-05	2e-05	1e-05	0	0	0	0	0	0	2e-05	1e-05	1e-05	2e-05	0	5e-05	1e-05	0	0	0	0	0	0	0	0	0	2e-05	0.0001	5e-05	0	0.00021	1e-05	0	0	0	0	0	0	0	0
1952412	Ruminococcaceae bacterium UBA6364	0	1e-05	1e-05	4e-05	1e-05	1e-05	3e-05	3e-05	1e-05	0	1e-05	1e-05	0	0	0	0	0	0	1e-05	1e-05	1e-05	2e-05	0	8e-05	1e-05	0	0	0	0	0	0	0	0	1e-05	0	1e-05	6e-05	0	2e-05	1e-05	0	0	0	0	0	0	0	0
1952290	Ruminococcaceae bacterium UBA1734	0	0	0	2e-05	0	0	2e-05	0	0	0	1e-05	1e-05	0	0	0	0	0	0	0	0	1e-05	0	0	2e-05	0	0	0	0	0	0	0	0	0	0	0	1e-05	2e-05	0	1e-05	0	0	0	0	0	0	0	0	0
1952422	Ruminococcaceae bacterium UBA6855	0	1e-05	1e-05	0.00048	0.00018	1e-05	8e-05	7e-05	6e-05	2e-05	1e-05	0.0045	0	0	0	0	0	0	0.00614	0	1e-05	0.0075	0	0.00352	1e-05	0	0	0	0	0	0	0	0	0	2e-05	6e-05	0.00092	1e-05	9e-05	4e-05	0	0	0	0	0	0	0	0
1952414	Ruminococcaceae bacterium UBA6413	0	0	1e-05	4e-05	2e-05	2e-05	5e-05	5e-05	0	1e-05	1e-05	0	0	0	0	0	0	0	0	1e-05	1e-05	0	0	0.0001	0	0	0	0	0	0	0	0	0	0	5e-05	0.00432	5e-05	0	3e-05	1e-05	0	0	0	0	0	0	0	0
1952329	Ruminococcaceae bacterium UBA4306	0	1e-05	1e-05	3e-05	2e-05	1e-05	3e-05	1e-05	1e-05	1e-05	1e-05	2e-05	0	0	0	0	0	0	5e-05	1e-05	2e-05	6e-05	0	3e-05	2e-05	0	0	0	0	0	0	0	0	1e-05	1e-05	1e-05	3e-05	0	2e-05	4e-05	0	0	0	0	0	0	0	0
1952388	Ruminococcaceae bacterium UBA5396	0	0	0	1e-05	1e-05	1e-05	1e-05	1e-05	0	1e-05	1e-05	0	0	0	0	0	0	0	1e-05	0	1e-05	1e-05	0	2e-05	3e-05	0	0	0	0	0	0	0	0	0	1e-05	1e-05	1e-05	0	3e-05	1e-05	0	0	0	0	0	0	0	0
1952302	Ruminococcaceae bacterium UBA2806	0	0	0	1e-05	1e-05	0	1e-05	0	1e-05	0	0	0	0	0	0	0	0	0	0	0	0	0	0	3e-05	0	0	0	0	0	0	0	0	0	0	0	0	2e-05	0	4e-05	0	0	0	0	0	0	0	0	0
1952430	Ruminococcaceae bacterium UBA7080	0	0	2e-05	2e-05	0	4e-05	3e-05	2e-05	0	0	8e-05	0	0	0	0	0	0	0	0	0	0	0	0	5e-05	0	0	0	0	0	0	0	0	0	0	0	1e-05	7e-05	0	1e-05	1e-05	0	0	0	0	0	0	0	0
1520817	Ruminococcaceae bacterium FB2012	0	1e-05	1e-05	6e-05	2e-05	1e-05	3e-05	1e-05	1e-05	1e-05	1e-05	2e-05	0	0	0	0	0	0	4e-05	1e-05	1e-05	3e-05	0	3e-05	2e-05	0	0	0	0	0	0	0	0	0	2e-05	2e-05	4e-05	1e-05	3e-05	2e-05	0	0	0	0	0	0	0	0
1952359	Ruminococcaceae bacterium UBA4958	0	0	1e-05	2e-05	2e-05	0	3e-05	0	2e-05	1e-05	1e-05	1e-05	0	0	0	0	0	0	2e-05	0	1e-05	3e-05	0	1e-05	1e-05	0	0	0	0	0	0	0	0	1e-05	1e-05	1e-05	2e-05	1e-05	5e-05	3e-05	0	0	0	0	0	0	0	0
1952399	Ruminococcaceae bacterium UBA5450	0	0	0	0	0	0	0	0	0	0	0	0	0	0	0	0	0	0	1e-05	0	0	1e-05	0	1e-05	0	0	0	0	0	0	0	0	0	0	0	0	0	0	1e-05	0	0	0	0	0	0	0	0	0
1952275	Ruminococcaceae bacterium UBA1213	0	0	0	1e-05	0	0	1e-05	0	0	0	0	1e-05	0	0	0	0	0	0	1e-05	0	1e-05	0	0	2e-05	0	0	0	0	0	0	0	0	0	0	0	1e-05	1e-05	0	2e-05	0	0	0	0	0	0	0	0	0
1952277	Ruminococcaceae bacterium UBA1236	0	0	0	2e-05	1e-05	0	1e-05	0	0	0	0	1e-05	0	0	0	0	0	0	1e-05	0	1e-05	2e-05	0	9e-05	1e-05	0	0	0	0	0	0	0	0	0	0	1e-05	3e-05	0	2e-05	1e-05	0	0	0	0	0	0	0	0
1952409	Ruminococcaceae bacterium UBA5904	0	0	0	1e-05	0	0	1e-05	0	1e-05	0	1e-05	1e-05	0	0	0	0	0	0	1e-05	0	0	1e-05	0	6e-05	0	0	0	0	0	0	0	0	0	0	0	1e-05	2e-05	0	0	0	0	0	0	0	0	0	0	0
1952305	Ruminococcaceae bacterium UBA2854	0	0	0	1e-05	1e-05	0	1e-05	1e-05	1e-05	1e-05	0	1e-05	0	0	0	0	0	0	0	1e-05	5e-05	1e-05	0	6e-05	0	0	0	0	0	0	0	0	0	0	1e-05	1e-05	2e-05	0	7e-05	0	0	0	0	0	0	0	0	0
1952320	Ruminococcaceae bacterium UBA3710	0	0	0	2e-05	0	0	1e-05	2e-05	0	0	1e-05	0	0	0	0	0	0	0	0	1e-05	1e-05	0	0	2e-05	0	0	0	0	0	0	0	0	0	0	0	2e-05	2e-05	0	1e-05	0	0	0	0	0	0	0	0	0
1952325	Ruminococcaceae bacterium UBA3903	0	0	1e-05	1e-05	0	1e-05	1e-05	0	0	1e-05	0	0	0	0	0	0	0	0	0	1e-05	0	0	0	1e-05	0	0	0	0	0	0	0	0	0	0	1e-05	1e-05	1e-05	0	3e-05	0	5e-05	0	0	0	0	0	0	0
1952421	Ruminococcaceae bacterium UBA6845	0	0	5e-05	0.00011	1e-05	2e-05	7e-05	8e-05	3e-05	1e-05	3e-05	1e-05	0	0	0	0	0	0	1e-05	0	1e-05	2e-05	0	0.0002	0	0	0	0	0	0	0	0	0	0	0	4e-05	0.00012	0	4e-05	1e-05	0	0	0	0	0	0	0	0
1952278	Ruminococcaceae bacterium UBA1244	0	0	0	2e-05	1e-05	0	1e-05	0	1e-05	0	0	1e-05	0	0	0	0	0	0	1e-05	0	1e-05	1e-05	0	4e-05	0	0	0	0	0	0	0	0	0	0	1e-05	1e-05	2e-05	0	3e-05	1e-05	0	0	0	0	0	0	0	0
1952279	Ruminococcaceae bacterium UBA1320	0	0	0	1e-05	1e-05	0	2e-05	0	0	0	0	0	0	0	0	0	0	0	1e-05	0	0	1e-05	0	1e-05	0	0	0	0	0	0	0	0	0	0	0	1e-05	1e-05	0	2e-05	1e-05	0	0	0	0	0	0	0	0
1952287	Ruminococcaceae bacterium UBA1448	0	0	1e-05	2e-05	3e-05	1e-05	2e-05	0	6e-05	1e-05	1e-05	0	0	0	0	0	0	0	3e-05	0	2e-05	3e-05	0	2e-05	3e-05	0	0	0	0	0	0	0	0	0	1e-05	2e-05	2e-05	1e-05	4e-05	2e-05	5e-05	0	0	0	0	0	0	0
1952295	Ruminococcaceae bacterium UBA1816	0	0	2e-05	2e-05	3e-05	2e-05	4e-05	1e-05	2e-05	8e-05	2e-05	1e-05	0	0	0	0	0	0	3e-05	0	3e-05	4e-05	0	8e-05	2e-05	0	0	0	0	0	0	0	0	1e-05	1e-05	4e-05	2e-05	1e-05	0.00017	4e-05	0	0	0	0	0	0	0	0
1952289	Ruminococcaceae bacterium UBA1730	0	0	1e-05	2e-05	1e-05	1e-05	2e-05	0	0	0	1e-05	1e-05	0	0	0	0	0	0	1e-05	0	0	1e-05	0	0.00017	0	0	0	0	0	0	0	0	0	0	1e-05	1e-05	3e-05	0	2e-05	1e-05	0	0	0	0	0	0	0	0
1952408	Ruminococcaceae bacterium UBA5891	0	1e-05	6e-05	0.00043	0.00063	5e-05	0.00163	0.00017	4e-05	3e-05	4e-05	1e-05	0	0	0	0	0	0	2e-05	1e-05	7e-05	5e-05	0	0.00011	5e-05	0	0	0	0	0	0	0	0	0	4e-05	0.00028	0.00063	1e-05	5e-05	4e-05	0	0	0	0	0	0	0	0
1952376	Ruminococcaceae bacterium UBA5295	0	0	0	1e-05	0	0	0	0	0	1e-05	0	0	0	0	0	0	0	0	2e-05	0	1e-05	1e-05	0	1e-05	0	0	0	0	0	0	0	0	0	0	0	0	1e-05	0	2e-05	1e-05	0	0	0	0	0	0	0	0
1952436	Ruminococcaceae bacterium UBA7147	0	0	0	1e-05	0	1e-05	1e-05	5e-05	0	1e-05	1e-05	1e-05	0	0	0	0	0	0	5e-05	1e-05	1e-05	2e-05	0	8e-05	1e-05	0	0	0	0	0	0	0	0	0	3e-05	2e-05	2e-05	0	0.01132	1e-05	0	0	0	0	0	0	0	0
1952389	Ruminococcaceae bacterium UBA5397	0	0	0	0	0	0	0	0	0	0	0	0	0	0	0	0	0	0	1e-05	0	0	1e-05	0	1e-05	0	0	0	0	0	0	0	0	0	0	0	0	0	0	1e-05	0	0	0	0	0	0	0	0	0
1952338	Ruminococcaceae bacterium UBA4843	0	0	0	1e-05	0	0	1e-05	0	1e-05	0	0	0	0	0	0	0	0	0	0	0	0	0	0	1e-05	0	0	0	0	0	0	0	0	0	0	0	0	1e-05	0	2e-05	1e-05	0	0	0	0	0	0	0	0
1952444	Ruminococcaceae bacterium UBA7217	0	0	2e-05	2e-05	1e-05	1e-05	4e-05	2e-05	1e-05	3e-05	2e-05	0	0	0	0	0	0	0	0	0	3e-05	0	0	0.00055	0	0	0	0	0	0	0	0	0	0	0	2e-05	4e-05	0	3e-05	0	0	0	0	0	0	0	0	0
1952449	Ruminococcaceae bacterium UBA945	0	0	0	1e-05	1e-05	0	2e-05	0	2e-05	0	0	1e-05	0	0	0	0	0	0	2e-05	0	1e-05	2e-05	0	1e-05	1e-05	0	0	0	0	0	0	0	0	1e-05	1e-05	1e-05	1e-05	0	2e-05	2e-05	0	0	0	0	0	0	0	0
1952433	Ruminococcaceae bacterium UBA7121	0	0	1e-05	1e-05	0	1e-05	0	0	0	1e-05	1e-05	0	0	0	0	0	0	0	0	0	0	0	0	0	0	0	0	0	0	0	0	0	0	0	2e-05	0	1e-05	0	0.00046	3e-05	0	0	0	0	0	0	0	0
1952323	Ruminococcaceae bacterium UBA3812	0	0	2e-05	1e-05	1e-05	5e-05	2e-05	0	1e-05	0	3e-05	1e-05	0	0	0	0	0	0	1e-05	0	1e-05	2e-05	0	9e-05	1e-05	0	0	0	0	0	0	0	0	0	1e-05	2e-05	2e-05	0	0.00025	1e-05	0	0	0	0	0	0	0	0
1410638	Ruminococcaceae bacterium AB4001	0	0	0	2e-05	0	0	0	0	0	0	0	0	0	0	0	0	0	0	0	0	0	0	0	0	0	0	0	0	0	0	0	0	0	0	0	0	4e-05	0	0	0	0	0	0	0	0	0	0	0
1952285	Ruminococcaceae bacterium UBA1438	0	0	1e-05	2e-05	1e-05	2e-05	2e-05	0	1e-05	0	4e-05	0	0	0	0	0	0	0	1e-05	1e-05	1e-05	1e-05	0	8e-05	1e-05	0	0	0	0	0	0	0	0	0	1e-05	0	8e-05	0	5e-05	1e-05	0	0	0	0	0	0	0	0
1952284	Ruminococcaceae bacterium UBA1425	0	0	0	1e-05	1e-05	0	2e-05	0	1e-05	1e-05	0	1e-05	0	0	0	0	0	0	2e-05	0	1e-05	5e-05	0	6e-05	1e-05	0	0	0	0	0	0	0	0	0	1e-05	1e-05	2e-05	0	4e-05	2e-05	0	0	0	0	0	0	0	0
1952321	Ruminococcaceae bacterium UBA3751	0	0	1e-05	1e-05	0	2e-05	2e-05	0	0	0	4e-05	0	0	0	0	0	0	0	0	0	0	0	0	0.00014	0	0	0	0	0	0	0	0	0	0	0	3e-05	0.00011	0	2e-05	1e-05	0	0	0	0	0	0	0	0
1952281	Ruminococcaceae bacterium UBA1404	0	0	1e-05	1e-05	1e-05	0	2e-05	1e-05	1e-05	0	0	1e-05	0	0	0	0	0	0	2e-05	0	1e-05	4e-05	0	1e-05	2e-05	0	0	0	0	0	0	0	0	0	1e-05	1e-05	1e-05	1e-05	3e-05	3e-05	0	0	0	0	0	0	0	0
1952300	Ruminococcaceae bacterium UBA2719	0	0	0	1e-05	1e-05	0	1e-05	0	0	0	0	1e-05	0	0	0	0	0	0	0	1e-05	6e-05	1e-05	0	2e-05	0	0	0	0	0	0	0	0	0	0	0	2e-05	1e-05	0	2e-05	0	0	0	0	0	0	0	0	0
1952292	Ruminococcaceae bacterium UBA1767	0	0	1e-05	1e-05	0	1e-05	1e-05	0	0	1e-05	1e-05	0	0	0	0	0	0	0	0	0	1e-05	0	0	0.00015	0	0	0	0	0	0	0	0	0	0	0	1e-05	2e-05	0	2e-05	0	0	0	0	0	0	0	0	0
1952319	Ruminococcaceae bacterium UBA3648	0	0	1e-05	0	0	1e-05	1e-05	1e-05	0	0	2e-05	0	0	0	0	0	0	0	0	0	0	0	0	3e-05	0	0	0	0	0	0	0	0	0	0	0	1e-05	2e-05	0	2e-05	1e-05	0	0	0	0	0	0	0	0
1952272	Ruminococcaceae bacterium UBA1081	0	0	0	1e-05	0	0	1e-05	0	0	0	1e-05	3e-05	0	0	0	0	0	0	2e-05	0	0	4e-05	0	7e-05	0	0	0	0	0	0	0	0	0	0	0	1e-05	2e-05	0	1e-05	1e-05	0	0	0	0	0	0	0	0
1952379	Ruminococcaceae bacterium UBA5312	0	0	0	0	0	0	0	0	0	0	0	0	0	0	0	0	0	0	0	0	0	0	0	0	0	0	0	0	0	0	0	0	0	0	0	0	0	0	0	0	0	0	0	0	0	0	0	0
1952387	Ruminococcaceae bacterium UBA5391	0	0	0	1e-05	1e-05	0	1e-05	0	0	0	0	0	0	0	0	0	0	0	2e-05	0	1e-05	2e-05	0	1e-05	1e-05	0	0	0	0	0	0	0	0	0	0	1e-05	1e-05	0	2e-05	1e-05	0	0	0	0	0	0	0	0
1952391	Ruminococcaceae bacterium UBA5401	0	0	0	0	0	0	0	0	1e-05	0	0	2e-05	0	0	0	0	0	0	0	0	0	1e-05	0	0	0	0	0	0	0	0	0	0	0	0	0	0	0	0	3e-05	1e-05	0	0	0	0	0	0	0	0
1952413	Ruminococcaceae bacterium UBA6392	0	0	1e-05	0.00029	0.0001	0	3e-05	0	2e-05	1e-05	0	0.00292	0	0	0	0	0	0	0.00462	0	0	0.00491	0	0.00316	2e-05	0	0	0	0	0	0	0	0	0	0	1e-05	0.00061	1e-05	1e-05	1e-05	0	0	0	0	0	0	0	0
1952420	Ruminococcaceae bacterium UBA6842	0	1e-05	1e-05	0.00087	4e-05	1e-05	0.00214	6e-05	3e-05	2e-05	1e-05	0	0	0	0	0	0	0	1e-05	1e-05	1e-05	2e-05	0	7e-05	1e-05	0	0	0	0	0	0	0	0	1e-05	1e-05	7e-05	0.00017	0	3e-05	2e-05	0	0	0	0	0	0	0	0
1952431	Ruminococcaceae bacterium UBA7101	0	0	4e-05	2e-05	0	6e-05	4e-05	2e-05	1e-05	0	0.00015	0	0	0	0	0	0	0	0	0	6e-05	0	0	7e-05	0	0	0	0	0	0	0	0	0	0	0	1e-05	0.00011	0	2e-05	1e-05	0	0	0	0	0	0	0	0
1952310	Ruminococcaceae bacterium UBA2944	0	0	0	1e-05	0	0	0	0	1e-05	0	0	1e-05	0	0	0	0	0	0	1e-05	0	0	2e-05	0	0	1e-05	0	0	0	0	0	0	0	0	0	0	0	1e-05	0	2e-05	1e-05	0	0	0	0	0	0	0	0
1952306	Ruminococcaceae bacterium UBA2857	0	0	0	2e-05	0	1e-05	1e-05	0	1e-05	0	1e-05	1e-05	0	0	0	0	0	0	0	0	0	0	0	2e-05	0	0	0	0	0	0	0	0	0	0	0	1e-05	2e-05	0	2e-05	0	0	0	0	0	0	0	0	0
1952435	Ruminococcaceae bacterium UBA7135	0	0	0	1e-05	0	0	1e-05	0	0	0	0	0	0	0	0	0	0	0	0	0	0	1e-05	0	1e-05	0	0	0	0	0	0	0	0	0	0	0	1e-05	1e-05	0	1e-05	1e-05	0	0	0	0	0	0	0	0
1952354	Ruminococcaceae bacterium UBA4936	0	0	0	0	0	0	0	0	0	0	0	0	0	0	0	0	0	0	0	0	0	0	0	0	0	0	0	0	0	0	0	0	0	0	0	0	0	0	0	0	0	0	0	0	0	0	0	0
1855400	Ruminococcaceae bacterium KH2T8	0	0	0	1e-05	0	0	1e-05	0	0	0	0	1e-05	0	0	0	0	0	0	0	0	0	0	0	1e-05	0	0	0	0	0	0	0	0	0	0	1e-05	0	1e-05	0	0	0	0	0	0	0	0	0	0	0
1952437	Ruminococcaceae bacterium UBA7161	0	0	2e-05	2e-05	1e-05	2e-05	3e-05	0	2e-05	2e-05	3e-05	0	0	0	0	0	0	0	1e-05	0	0	8e-05	0	0.0001	0	0	0	0	0	0	0	0	0	0	4e-05	1e-05	2e-05	1e-05	1e-05	3e-05	0	0	0	0	0	0	0	0
1952345	Ruminococcaceae bacterium UBA4896	0	0	0	1e-05	1e-05	0	1e-05	1e-05	1e-05	0	0	9e-05	0	0	0	0	0	0	1e-05	0	0	5e-05	0	1e-05	2e-05	0	0	0	0	0	0	0	0	0	0	0	1e-05	0	3e-05	1e-05	0	0	0	0	0	0	0	0
1952342	Ruminococcaceae bacterium UBA4871	0	0	0	1e-05	0	0	1e-05	0	1e-05	0	0	0	0	0	0	0	0	0	0	0	0	0	0	1e-05	0	0	0	0	0	0	0	0	0	0	0	0	1e-05	0	2e-05	1e-05	0	0	0	0	0	0	0	0
1520816	Ruminococcaceae bacterium YAD3003	0	0	0	1e-05	0	0	0	0	0	0	0	0	0	0	0	0	0	0	0	0	0	0	0	2e-05	0	0	0	0	0	0	0	0	0	1e-05	0	0	2e-05	0	0	0	0	0	0	0	0	0	0	0
1952311	Ruminococcaceae bacterium UBA3215	0	0	0	2e-05	1e-05	0	1e-05	0	0	0	0	0	0	0	0	0	0	0	1e-05	0	0	1e-05	0	2e-05	0	0	0	0	0	0	0	0	0	0	0	1e-05	2e-05	0	1e-05	1e-05	0	0	0	0	0	0	0	0
1952447	Ruminococcaceae bacterium UBA794	0	0	0	3e-05	1e-05	0	1e-05	0	0	0	1e-05	0	0	0	0	0	0	0	1e-05	0	0	1e-05	0	4e-05	0	0	0	0	0	0	0	0	0	0	0	1e-05	5e-05	0	2e-05	1e-05	0	0	0	0	0	0	0	0
1952317	Ruminococcaceae bacterium UBA3334	0	0	0	0	0	0	0	0	0	0	0	0	0	0	0	0	0	0	0	0	0	1e-05	0	0	0	0	0	0	0	0	0	0	0	0	0	0	0	0	1e-05	0	0	0	0	0	0	0	0	0
39492	[Eubacterium] siraeum	1e-05	3e-05	0.0001	0.0008	0.00041	0.0014	0.00101	0.00042	0.00011	0.0001	6e-05	3e-05	3e-05	9e-05	3e-05	7e-05	0.00038	0.00057	0.0002	4e-05	0.00017	7e-05	0	0.00052	0.00011	0.00061	7e-05	7e-05	0	0.00082	0	0.00105	4e-05	1e-05	0.00687	0.0054	0.00229	4e-05	0.00103	7e-05	0	7e-05	4e-05	0.00107	0.01242	0.00057	0.00055	0.00376
84026	[Clostridium] methylpentosum	1e-05	4e-05	2e-05	4e-05	3e-05	2e-05	0.00011	0.00012	7e-05	4e-05	2e-05	3e-05	0	0	2e-05	0	0	0	3e-05	3e-05	4e-05	5e-05	0	3e-05	8e-05	0	0	0	0	0	0	0	0	4e-05	5e-05	3e-05	4e-05	3e-05	0.00033	7e-05	0	0	0	0	0	0	0.0001	0
1535	[Clostridium] leptum	1e-05	1e-05	0.00068	0.00074	0.00086	0.00463	0.00036	0.00133	0.00782	0.03486	0.00787	0.00041	0	0	0	0	0	0	0.00053	1e-05	0.0007	0.00028	0	0.00245	0.00646	0	0	0	0	0	0	0	0	1e-05	0.00045	0.00159	0.0001	0.00023	0.00338	0.0007	0	0	0	0.00238	0	0	0	0
1549	[Clostridium] sporosphaeroides	0	2e-05	1e-05	4e-05	5e-05	1e-05	4e-05	1e-05	3e-05	2e-05	1e-05	2e-05	0	0	0	0	0	0	5e-05	1e-05	2e-05	4e-05	0	2e-05	3e-05	0	0	0	0	0	0	0	0	1e-05	2e-05	4e-05	3e-05	0	7e-05	5e-05	0	0	0	0	0	0	0	0
47246	[Clostridium] viride	0	1e-05	1e-05	3e-05	2e-05	1e-05	5e-05	2e-05	1e-05	1e-05	1e-05	1e-05	0	0	2e-05	0	4e-05	0.00083	1e-05	1e-05	1e-05	2e-05	0	2e-05	1e-05	0.00197	3e-05	0.00172	0.0106	2e-05	3e-05	0.00018	0	0	1e-05	2e-05	3e-05	0	2e-05	2e-05	0.00964	0	1e-05	3e-05	0.01187	0	0.00276	0.00215
29343	[Clostridium] cellulosi	0	0	0	1e-05	1e-05	0	1e-05	0	1e-05	1e-05	1e-05	1e-05	0	2e-05	0	0	0	5e-05	1e-05	0	1e-05	1e-05	0	2e-05	1e-05	0	0	0	0	7e-05	2e-05	2e-05	0	0	0	1e-05	1e-05	0	1e-05	1e-05	0	4e-05	0	7e-05	0.00017	4e-05	0.00017	2e-05
214851	Subdoligranulum variabile	0.0004	0.0007	0.0004	0.00033	0.0006	0.00043	0.00068	0.00017	0.0017	0.00052	0.0006	0.00125	0.02169	0.0008	0.01605	0.0292	0.02882	0.03087	0.00409	0.00073	0.00228	0.00403	0	0.00233	0.00305	0.02932	0.01715	0.08605	0.03065	0.03387	0.02868	0.00791	0.01803	0.00165	0.00182	0.00027	0.00037	0.00131	0.00055	0.00205	0.0503	0.01332	0.00951	0.02156	0.0126	0.02106	0.03051	0.00903
1262970	Subdoligranulum sp. CAG:314	1e-05	0	0	0	0	0	0	0	0	0	0	0	0	0	0	0	0	0	0	0	0	1e-05	0	1e-05	0	0	0	0	0	0	0	0	0	0	0	0	0	0	1e-05	0	0	0	0	0	0	0	0	0
169435	Anaerotruncus colihominis	0.00015	0.00023	0.00033	0.00032	0.00069	0.00038	0.00054	0.00089	0.00028	0.00054	0.00032	0.00027	0.00014	0	0	4e-05	0.00011	0.00077	0.00028	0.00026	0.00029	0.00038	0	0.00034	0.00087	0.00297	0	0.00052	0	0	0	0	0	9e-05	0.00088	0.00046	0.00029	8e-05	0.00095	0.00028	0.0005	0	0.00011	0	0.00175	0.00019	0.00165	8e-05
905011	uncultured Anaerotruncus sp.	6e-05	0.00078	0.00033	9e-05	0.00021	0.00014	0.00012	0.00071	0.00038	4e-05	0.00011	9e-05	0	0	0	0	0	0.00017	0.00062	0.00043	0.00011	0.00011	0	0.0001	0.00091	2e-05	0	0	0	0	0	2e-05	0	0.00092	0.00026	7e-05	9e-05	0.00019	0.00022	6e-05	0	0	0	0	0	0	0	0
1262703	Anaerotruncus sp. CAG:390	4e-05	9e-05	3e-05	0.00047	0.00016	1e-05	0.00043	0.00023	4e-05	7e-05	3e-05	0.0005	0	0	0	0	0	0	0.00086	8e-05	4e-05	0.00077	0	0.00024	2e-05	0	0	0	0	0	0	0	0	4e-05	5e-05	0.00031	0.00055	1e-05	6e-05	7e-05	0	0	0	0	0	0	0	0
1262700	Anaerotruncus sp. CAG:528	0	1e-05	8e-05	9e-05	0.00013	0.00013	0.00023	0.0003	3e-05	0.00012	0.00028	0	0	0	0	0	0	0	1e-05	1e-05	7e-05	1e-05	0	0.00026	5e-05	0	0	0	0	0	0	0	0	0	8e-05	6e-05	0.00032	1e-05	3e-05	4e-05	0	0	0	0	0	0	0	0
1235835	Anaerotruncus sp. G3(2012)	2e-05	3e-05	5e-05	6e-05	7e-05	5e-05	7e-05	6e-05	8e-05	6e-05	6e-05	6e-05	0	0	0	0	0	0	7e-05	4e-05	5e-05	0.00013	0	6e-05	0.00019	0	0	0	0	0	0	0	0	2e-05	7e-05	5e-05	7e-05	4e-05	0.00014	7e-05	0	0	0	0	0	0	0	0
1720200	Anaerotruncus rubiinfantis	0	1e-05	5e-05	3e-05	9e-05	4e-05	0.00013	2e-05	2e-05	2e-05	4e-05	4e-05	0	0	0	0	0	0	2e-05	1e-05	5e-05	0.0001	0	2e-05	4e-05	0	0	0	0	0	0	0	0	0	2e-05	9e-05	4e-05	1e-05	0.00027	5e-05	0	0	0	0	6e-05	0	0	0
1673720	Anaerotruncus sp. AT3	0	1e-05	2e-05	4e-05	4e-05	1e-05	9e-05	2e-05	2e-05	2e-05	1e-05	4e-05	0.00014	0.00011	0.0001	0.00018	0.00012	0.00018	4e-05	1e-05	3e-05	0.0002	0	3e-05	0.00016	0.0001	0.00012	0.00027	0.00036	0.00032	8e-05	0.00015	0.00011	1e-05	2e-05	5e-05	5e-05	1e-05	0.00015	8e-05	0.00065	0	0.00014	0.00032	0.0004	5e-05	0.00051	0.00021
1871015	Pseudoflavonifractor sp. Marseille-P3106	8e-05	0.00016	0.00014	0.00029	0.00031	0.00042	0.00035	0.00052	0.00031	0.00014	0.0001	0.0001	0	0	0	0	0	0	0.00029	0.00014	0.00041	0.00022	0	0.00012	0.00027	0	0	0	0	0	0	0	0	8e-05	0.00061	0.00024	0.00031	0.00015	0.0005	0.00018	0	0	2e-05	0	0	0	0	0
1965576	Pseudoflavonifractor sp. An184	7e-05	7e-05	0.00029	0.00027	0.00026	0.00015	0.00026	0.00024	0.0001	0.0002	0.00015	0.00029	0	0	0	0	0	0	0.0001	4e-05	0.0005	0.00044	0	0.00018	0.00013	3e-05	0	0	0	0	0	0	0	0.00032	0.00021	0.0002	0.00026	4e-05	0.00679	0.00014	0	0	0	0	0.00047	0	0	0
106588	Pseudoflavonifractor capillosus	4e-05	7e-05	0.00018	0.00025	0.00037	0.00018	0.00031	0.00017	0.00024	0.00047	0.00015	0.00032	0	0	0	0	0	0	0.00018	7e-05	0.00026	0.0007	0	0.00018	0.00037	0	0	0	0	0	0	0	0	0.00019	0.0003	0.00023	0.00026	8e-05	0.00147	0.00018	0	0	0	0	0	0	0	0
1965661	Pseudoflavonifractor sp. An85	3e-05	4e-05	6e-05	0.0001	8e-05	6e-05	0.00017	0.00012	9e-05	0.00031	7e-05	6e-05	0	0	0	0	0	0	7e-05	4e-05	0.00014	0.00011	0	0.00012	0.00088	0	0	0	0	0	0	0	0	7e-05	0.0001	6e-05	0.0001	4e-05	0.00038	0.0001	0	0	0	0	0	0	0	0
1965572	Pseudoflavonifractor sp. An176	2e-05	2e-05	4e-05	0.00013	7e-05	3e-05	0.00018	9e-05	5e-05	9e-05	3e-05	3e-05	0	0.00023	2e-05	2e-05	0.00012	0	0.00013	3e-05	6e-05	8e-05	0	5e-05	9e-05	0	0	0	0	0.00254	0.00168	0	0.00277	3e-05	9e-05	0.0001	0.00013	2e-05	0.00023	9e-05	0	0	0.00036	0.00031	0.00065	0.00263	5e-05	5e-05
1550024	Ruthenibacterium lactatiformans	0.0002	0.00036	0.00094	0.00059	0.00112	0.00108	0.00323	0.00457	0.01446	0.00281	0.00116	0.0091	0	0	0	0	0	0	0.00766	0.0008	0.00095	0.02003	0	0.00279	0.00774	0	0	0	0	0	0	0	0	0.02145	0.00374	0.00204	0.00063	0.007	0.03399	0.00368	0	0	0	0	0	0	0	0
1965589	Drancourtella sp. An210	0.0001	8e-05	6e-05	7e-05	5e-05	5e-05	4e-05	0.00011	0.0001	0.0001	6e-05	4e-05	0	0	0	0	0	0	4e-05	9e-05	0.00023	5e-05	0	8e-05	7e-05	0	0	0	0	0	0	0	0	3e-05	7e-05	8e-05	6e-05	3e-05	0.00034	6e-05	0	0	0	0	0	0	0	0
1965647	Drancourtella sp. An57	3e-05	3e-05	2e-05	4e-05	3e-05	3e-05	2e-05	3e-05	4e-05	3e-05	3e-05	2e-05	2e-05	0	2e-05	0	0	3e-05	2e-05	4e-05	0.00338	2e-05	0	4e-05	4e-05	0.00014	0	0	0	0	0	0	0	2e-05	4e-05	3e-05	4e-05	1e-05	0.00011	1e-05	0	0	2e-05	2e-05	0	0	0	5e-05
1871018	Angelakisella massiliensis	0.00013	0.00025	0.00017	0.00038	0.00056	0.00011	0.00053	0.00029	0.00015	0.00024	0.00019	0.00013	0	0	0	0	0	0	0.00026	0.00025	0.00026	0.00028	0	0.0003	0.00026	0	0	0	0	0	0	0	0	8e-05	0.00036	0.00039	0.00058	5e-05	0.00094	0.00023	0	0	0	0	0	0	0	0
1965587	Anaeromassilibacillus sp. An200	5e-05	6e-05	0.00011	0.00011	0.00026	0.0001	0.00025	9e-05	0.00011	0.0001	0.00012	7e-05	0	0	0	0	0	0	0.00011	6e-05	0.00031	0.00022	0	0.00012	0.0003	0	0	0	0	0	0	0	0	4e-05	0.0002	0.00025	0.0001	3e-05	0.00271	0.00012	0	0	0	0	0	0	0	0
1965604	Anaeromassilibacillus sp. An250	2e-05	2e-05	8e-05	6e-05	0.0007	7e-05	0.00016	0.00033	0.00013	0.00045	0.0001	0.00014	0	0	0	0	0	0	0.0001	3e-05	0.00031	0.00027	0	0.00055	0.00065	0	0	0	0	0	0	0	0	4e-05	0.00028	0.00119	6e-05	2e-05	0.00219	0.00021	0	0	0	0	0	0	0	0
2041843	Anaeromassilibacillus sp. Marseille-P4683	1e-05	9e-05	6e-05	0.00052	0.00029	5e-05	0.00034	0.00045	9e-05	0.00012	8e-05	6e-05	0	5e-05	0	0	0	0.00012	8e-05	7e-05	0.00014	0.00022	0	0.00019	0.00012	2e-05	0	7e-05	5e-05	0.00025	5e-05	0.00053	2e-05	0.00024	0.00023	0.00025	0.00048	3e-05	0.00023	0.00021	0	0	0	0.00022	0.00127	0	0.00022	3e-05
1965570	Anaeromassilibacillus sp. An172	1e-05	1e-05	5e-05	7e-05	9e-05	5e-05	7e-05	6e-05	3e-05	0.00084	5e-05	2e-05	0	0.00038	2e-05	0	0	0.00037	0.00012	2e-05	0.00016	4e-05	0	0.00016	0.00026	0.00032	3e-05	3e-05	0	0.00078	0	0.00067	6e-05	1e-05	0.00014	0.00012	6e-05	0	0.00038	4e-05	0	0.00034	0	0.0006	0.00278	0.00013	0.00074	0
1673717	Anaeromassilibacillus senegalensis	0	1e-05	1e-05	3e-05	2e-05	1e-05	3e-05	1e-05	4e-05	2e-05	1e-05	1e-05	0	0.00047	0	2e-05	0	5e-05	4e-05	1e-05	1e-05	5e-05	0	3e-05	4e-05	3e-05	0	0	0	0.00013	2e-05	0.00075	0.00044	1e-05	1e-05	2e-05	3e-05	1e-05	9e-05	5e-05	5e-05	0.00118	8e-05	0.0002	0.0001	0	2e-05	0
290052	Acetivibrio ethanolgignens	7e-05	0.00015	0.00018	0.00022	9e-05	0.00021	5e-05	0.0001	0.00017	0.00011	0.00017	0.00023	2e-05	0	9e-05	2e-05	0	6e-05	0.00011	0.00016	7e-05	8e-05	0	9e-05	0.00016	0	8e-05	0	0	3e-05	0	8e-05	2e-05	0.00057	8e-05	0.00014	0.0002	6e-05	3e-05	5e-05	0	0	2e-05	2e-05	0	0	2e-05	0
1650663	Fournierella massiliensis	6e-05	0.0001	8e-05	0.00018	0.00017	6e-05	0.00034	0.00013	0.00021	0.00024	8e-05	0.00021	0	0	0	0	0	0	0.00052	0.0001	0.00064	0.00054	0	0.00041	0.00042	0	0	0	0	0	0	0	0	7e-05	0.00029	0.00011	0.0002	0.00012	0.00074	0.00029	0	0	0	0	0	0	0	0
39484	Agathobaculum desmolans	6e-05	5e-05	4e-05	9e-05	0.00023	5e-05	0.00022	5e-05	7e-05	0.00014	6e-05	4e-05	0	0	0	0	0	0	7e-05	5e-05	7e-05	7e-05	0	0.00024	6e-05	0	0	0	0	0	0	0	0	0.00039	0.00019	8e-05	0.0001	4e-05	0.00012	0.00014	0	0	0	0	0	0	0	0
1965588	Anaerofilum sp. An201	2e-05	4e-05	0.0001	0.00021	0.0002	7e-05	0.00034	0.0001	0.00016	0.00071	8e-05	0.00011	0.00018	0	0	0	0	0	0.00033	5e-05	0.0004	0.00038	0	0.00019	0.00028	0	4e-05	0	0	0	0	0	0	7e-05	0.00012	0.00016	0.00018	0.0001	0.00128	0.00029	0	0	0	0	0.00027	0	0.00015	0
1720313	Bittarella massiliensis	3e-05	4e-05	3e-05	2e-05	7e-05	5e-05	0.00017	0.0001	0.00017	0.0001	8e-05	0.00041	0	0	0	0	0	0	0.00014	5e-05	0.00015	0.00088	0	0.0001	0.00047	0	0	0	0	0	0	0	0	0	0.00034	9e-05	2e-05	0.00011	0.00036	0.00053	0	0	0	0	0	0	0	0
1871035	Negativibacillus massiliensis	8e-05	0.00017	8e-05	0.00027	0.00043	7e-05	0.0003	8e-05	0.0002	0.00025	7e-05	0.00017	0	0	0	0	0	0	0.0002	0.00015	0.00023	0.00038	0	0.00013	0.00017	0	0	0	0	0	0	0	0.00249	2e-05	0.0004	0.00015	0.00034	2e-05	0.00022	0.00022	0	0	0	0.01199	0	0	0	0
1841868	Provencibacterium massiliense	2e-05	3e-05	0.00014	9e-05	0.0002	4e-05	8e-05	3e-05	3e-05	5e-05	0.00012	9e-05	0	0	0	0	0	0	9e-05	3e-05	0.00016	0.00046	0	8e-05	0.00024	0	0	0	0	0	0	0	0	2e-05	0.0003	0.0001	0.00014	1e-05	0.0004	0.0001	0	0	0	0	0	0	0	0
1776382	Neglecta timonensis	1e-05	2e-05	4e-05	7e-05	0.00116	0.00102	7e-05	3e-05	0.00039	0.0001	0.00047	0.0001	0	0	0	0	0	0	9e-05	3e-05	5e-05	0.0001	0	4e-05	0.01741	0	0	0	0	0	0	0	0	2e-05	0.00022	0.00013	7e-05	2e-05	0.00028	0.00013	0	0	0	0	0	0	0	0
2014781	Neglecta sp. Marseille-P3890	0	0	1e-05	2e-05	1e-05	1e-05	2e-05	1e-05	1e-05	1e-05	1e-05	1e-05	0	0	0	0	0	0	0	1e-05	1e-05	1e-05	0	2e-05	1e-05	0	5e-05	0	0	0	0	0	0	0	1e-05	1e-05	2e-05	0	3e-05	1e-05	0	0	0	0	0	0	0	0
1917873	Pygmaiobacter massiliensis	1e-05	2e-05	1e-05	2e-05	3e-05	2e-05	3e-05	1e-05	2e-05	2e-05	2e-05	4e-05	4e-05	0	0	2e-05	0	0	0.00013	2e-05	5e-05	0.00011	0	6e-05	5e-05	0.00055	2e-05	0	0.0001	0	0	0	2e-05	1e-05	4e-05	2e-05	2e-05	1e-05	9e-05	5e-05	0	0	1e-05	0.00026	0.00073	0	0.00608	0
1796620	Acutalibacter muris	1e-05	2e-05	3e-05	6e-05	5e-05	3e-05	8e-05	3e-05	5e-05	5e-05	2e-05	2e-05	0	0	2e-05	0	0	7e-05	3e-05	2e-05	3e-05	6e-05	0	3e-05	0.00015	0	3e-05	0	0	7e-05	0	7e-05	0	1e-05	2e-05	5e-05	6e-05	2e-05	0.00014	0.0001	0	0	1e-05	3e-05	0.00033	4e-05	0.00013	0
1841867	Phocea massiliensis	4e-05	4e-05	0.0001	7e-05	0.00026	2e-05	0.00022	0.00013	0.00024	9e-05	0.0002	9e-05	0	0	0	0	0	0	2e-05	9e-05	4e-05	0.00019	0	0.0001	5e-05	0	0	0	0	0	0	0	0	2e-05	7e-05	0.00042	9e-05	2e-05	3e-05	2e-05	0	0	0	0	0	0	0	0
474960	Hydrogenoanaerobacterium saccharovorans	1e-05	0	1e-05	1e-05	1e-05	1e-05	1e-05	1e-05	1e-05	1e-05	1e-05	1e-05	0	0	0	0	0	3e-05	3e-05	0	2e-05	3e-05	0	2e-05	1e-05	2e-05	0	0	0	2e-05	0	0	0	0	1e-05	1e-05	2e-05	0	3e-05	1e-05	0	0	3e-05	2e-05	0	0	4e-05	0
1987501	Massilimaliae timonensis	0	1e-05	2e-05	2e-05	6e-05	1e-05	2e-05	0.00019	2e-05	0.00043	2e-05	2e-05	0	0	0	0	0	5e-05	4e-05	1e-05	3e-05	4e-05	0	8e-05	3e-05	0	0	0	0	0	0	0	0	0	8e-05	3e-05	1e-05	1e-05	0.00021	3e-05	0	0	0	0	0	7e-05	0	0
1852384	Massilimaliae massiliensis	0	0	4e-05	5e-05	6e-05	4e-05	0.00013	2e-05	1e-05	5e-05	4e-05	1e-05	0	0	0	0	0	0	1e-05	0	3e-05	3e-05	0	7e-05	5e-05	0	0	0	0.00029	0	0	0	0	0	0.00012	7e-05	4e-05	0	0.00047	2e-05	0	0	0	0.00015	0.00042	0	0	0
44749	Sporobacter termitidis	0	1e-05	2e-05	7e-05	4e-05	1e-05	8e-05	4e-05	3e-05	1e-05	1e-05	2e-05	0	0.00023	0	2e-05	0	0.00038	2e-05	1e-05	2e-05	6e-05	0	3e-05	2e-05	0.00158	5e-05	0	0	0.00021	2e-05	0.00023	2e-05	1e-05	2e-05	3e-05	7e-05	1e-05	0.00011	6e-05	0.00014	4e-05	2e-05	0.00109	0.00486	0	0.00068	0
1470354	Candidatus Soleaferrea massiliensis	0	1e-05	1e-05	2e-05	2e-05	1e-05	4e-05	1e-05	2e-05	1e-05	1e-05	2e-05	0	0	0	0	0	0	1e-05	1e-05	2e-05	3e-05	0	2e-05	2e-05	0	0	0	0	0	0	0	0	0	1e-05	2e-05	2e-05	1e-05	6e-05	4e-05	0	0	0	0	0	0	0	0
1944642	Marasmitruncus massiliensis	0	0	1e-05	3e-05	2e-05	1e-05	5e-05	1e-05	1e-05	2e-05	1e-05	1e-05	0	0	0	0	0	0	1e-05	0	3e-05	2e-05	0	1e-05	1e-05	0	0	0	0	0	0	0	0	0	1e-05	2e-05	3e-05	0	4e-05	3e-05	0	0	0	0	0	0	0	2e-05
258515	Acetanaerobacterium elongatum	0	0	1e-05	2e-05	2e-05	1e-05	3e-05	1e-05	2e-05	1e-05	1e-05	2e-05	0	0	0	0	0	0	4e-05	1e-05	2e-05	5e-05	0	2e-05	2e-05	0	0	0	0	0	0	0	0	1e-05	1e-05	2e-05	2e-05	1e-05	7e-05	3e-05	0	0	0	0	0	0	0	0
100176	Papillibacter cinnamivorans	0	0	1e-05	5e-05	2e-05	1e-05	6e-05	4e-05	1e-05	1e-05	2e-05	1e-05	0	0.00017	0	0	0	0.0001	1e-05	0	1e-05	4e-05	0	2e-05	1e-05	0.00032	2e-05	0.00012	0	0.00013	0	0.00017	0.00016	1e-05	3e-05	3e-05	5e-05	0	6e-05	3e-05	0	0	3e-05	0.00033	0.00478	0.00062	0.00031	0
253239	Ethanoligenens harbinense	0	0	2e-05	3e-05	3e-05	1e-05	5e-05	1e-05	1e-05	1e-05	1e-05	3e-05	0	0.00042	0	4e-05	0	0.00031	2e-05	0	2e-05	5e-05	0	5e-05	2e-05	0.00015	0	6e-05	0	0.0008	0	0.00058	0	1e-05	2e-05	3e-05	3e-05	0	8e-05	3e-05	0	4e-05	8e-05	0.00066	0.00267	0	0.00072	4e-05
59620	uncultured Clostridium sp.	0.01978	0.0173	0.02328	0.0154	0.02099	0.03512	0.01259	0.05288	0.03443	0.01276	0.05496	0.00649	0.00287	0.00217	0.00713	0.00215	0.01882	0.00734	0.00936	0.03123	0.0339	0.00695	0.027	0.04365	0.01656	0.0061	0.01067	0.00056	0.00055	0.00455	0.01652	0.01195	0.01179	0.00877	0.03468	0.02406	0.01191	0.00481	0.00618	0.00469	0.00586	0.03637	0.00684	0.00255	0.04361	0.00717	0.00601	0.00112
1262832	Clostridium sp. CAG:7	0.00484	0.00154	0.00104	0.00062	0.00292	0.00079	7e-05	0.00012	0.00011	7e-05	0.00039	4e-05	0	0	0	0	0	0	3e-05	0.00359	7e-05	2e-05	0	6e-05	0.0002	0	0	0	0	0	2e-05	0	0	0.00011	5e-05	0.0003	0.00057	4e-05	2e-05	2e-05	0	0	0	0	0	0	0	0
1262805	Clostridium sp. CAG:43	0.00465	0.00814	0.00303	0.00039	0.00157	0.00234	0.0006	9e-05	0.00029	0.00068	0.00219	7e-05	0	0	0	0	0	0	4e-05	0.00988	4e-05	5e-05	0	0.00046	0.00032	0	0	0	0	0	0	0	2e-05	0.00018	6e-05	0.00126	0.00039	8e-05	2e-05	3e-05	0	0	1e-05	0	0	0	0	0
1262845	Clostridium sp. CAG:91	0.00093	0.00059	0.00232	0.00242	0.00436	0.00046	0.00051	0.02826	7e-05	0.00077	0.00011	4e-05	0	0	0	0	0	0	4e-05	0.00335	0.00088	0.00012	0	0.00162	0.0003	0	0	0	0	0	0	0	0	0.00032	0.00088	0.00078	0.00045	1e-05	0.00013	5e-05	0	0	0	0	0	0	0	0
1262842	Clostridium sp. CAG:81	0.00017	0.0003	0.0003	0.00014	0.00028	0.00026	9e-05	4e-05	0.00012	3e-05	0.00012	3e-05	0	0	0	0	0	0	1e-05	0.00037	0.0001	4e-05	0	5e-05	8e-05	0	0	0	0	0	0	0	0	2e-05	6e-05	0.00013	0.00042	2e-05	3e-05	2e-05	0	0	0	0	0	0	0	0
1262836	Clostridium sp. CAG:75	5e-05	4e-05	0.01036	6e-05	0.00181	0.00319	3e-05	0.00012	0.0001	0.00021	0.00314	4e-05	0	0	0	0	0	0	0.00084	5e-05	2e-05	7e-05	0	5e-05	5e-05	0	0	0	0	0	0	0	0	0.0001	1e-05	2e-05	6e-05	4e-05	1e-05	1e-05	0	0	0	0	0	0	0	0
1262825	Clostridium sp. CAG:590	4e-05	3e-05	5e-05	0.01518	3e-05	2e-05	2e-05	2e-05	4e-05	0.00051	3e-05	3e-05	0	0	0	0	0	0	3e-05	3e-05	1e-05	1e-05	0	2e-05	2e-05	0	0	0	0	0	0	0	0	1e-05	4e-05	4e-05	0.00678	2e-05	1e-05	1e-05	0	0	0	0	0	0	0	0
1262824	Clostridium sp. CAG:58	4e-05	3e-05	2e-05	8e-05	4e-05	2e-05	3e-05	3e-05	2e-05	0.0001	3e-05	3e-05	0	0	0	0	0	0	1e-05	3e-05	3e-05	4e-05	0	5e-05	5e-05	0	8e-05	0	0	0	0	0	0	0.00029	4e-05	4e-05	8e-05	0	4e-05	2e-05	0	0	0	0	0	0	0	0
1262828	Clostridium sp. CAG:62	3e-05	2e-05	0.03147	0.00598	0.00494	0.00558	0.00041	0.00028	0.0006	0.00148	0.00384	0.0003	0	0	0	0	0	0	0.00034	2e-05	2e-05	0.00119	0	0.00089	0.0002	0	0	0	0	0.00019	0	0	0	5e-05	0.00251	0.00029	0.00456	7e-05	0.00284	8e-05	0	0	1e-05	0	0	0	0	0
1262774	Clostridium sp. CAG:127	2e-05	3e-05	2e-05	0.00021	0.08497	6e-05	8e-05	0.0001	0.00023	2e-05	8e-05	1e-05	0	0	0	0	8e-05	0	0.00017	3e-05	0.00218	1e-05	0	0.0076	1e-05	0	0	0	0	0	0	0	0	0.00012	4e-05	0.00076	0.00045	0.00013	1e-05	3e-05	0	0	0	0	0	8e-05	5e-05	0
1262792	Clostridium sp. CAG:299	2e-05	1e-05	2e-05	5e-05	2e-05	2e-05	2e-05	3e-05	1e-05	1e-05	1e-05	1e-05	0	0	0	0	0	0	1e-05	2e-05	9e-05	1e-05	0	3e-05	2e-05	0	0	0	5e-05	0	0	0	0	1e-05	2e-05	2e-05	5e-05	1e-05	4e-05	1e-05	0	0.00015	0	0	0	0	0	0
1262816	Clostridium sp. CAG:510	2e-05	3e-05	5e-05	0.00056	9e-05	3e-05	3e-05	4e-05	4e-05	3e-05	6e-05	1e-05	0	0	0	0	0	0	4e-05	3e-05	2e-05	1e-05	0	0.00306	5e-05	0	0	0	0	0	0	0	0	1e-05	2e-05	0.02389	0.00055	3e-05	1e-05	1e-05	0	0	0	0	0	0	0	0
1262790	Clostridium sp. CAG:277	2e-05	1e-05	0.00013	0.00037	5e-05	5e-05	2e-05	4e-05	2e-05	1e-05	4e-05	1e-05	0	0	0	0	0	0	2e-05	2e-05	3e-05	2e-05	0	0.00623	7e-05	0	0	0	0	0	0	0	0	8e-05	2e-05	0.00011	0.00286	1e-05	1e-05	1e-05	0	0	0	0	0	0.00021	0	0
1262837	Clostridium sp. CAG:762	2e-05	1e-05	0	3e-05	1e-05	0	0	0	0	0	0	0	0	0	0	0	0	0	0	0	0	1e-05	0	0	0	0	0	0	0	0	0	0	0	0	0	2e-05	2e-05	0	0	0	0	0	0	0	3e-05	0	0	0
1262785	Clostridium sp. CAG:253	2e-05	1e-05	0.00012	8e-05	3e-05	5e-05	1e-05	1e-05	2e-05	1e-05	6e-05	7e-05	0	0	0	0	0	0	2e-05	1e-05	1e-05	2e-05	0	2e-05	1e-05	0	0	0	0	0	0	0	0	1e-05	1e-05	0.00026	8e-05	1e-05	1e-05	0	0	0	0	0	0	0	0	0
1262784	Clostridium sp. CAG:245	2e-05	0.0003	0.00014	0.00028	0.00112	0	0.00037	0	0	0	0.00049	2e-05	0	0	0	0	0	0	0	0.00315	0	0.00093	0	0.00013	0	0	0	0	0	0	0	0	0	0	0.00016	0.00033	0.00072	0	0	0.00025	0	0	0	0	0	0	0	0
1262802	Clostridium sp. CAG:411	1e-05	1e-05	2e-05	0.00015	1e-05	2e-05	0	1e-05	3e-05	1e-05	1e-05	1e-05	0	0	0	0	0	0	2e-05	1e-05	1e-05	0	0	2e-05	2e-05	0	0	0	0	0	0	0	0	0	1e-05	3e-05	0.00014	2e-05	1e-05	1e-05	0	0	0	0	0	0	0	0
1262848	Clostridium sp. CAG:964	1e-05	7e-05	2e-05	0.00589	5e-05	3e-05	6e-05	8e-05	0.00013	0.00015	3e-05	0.0001	0	0	0	0	0	0	0.00017	7e-05	0.00025	4e-05	0	0.00013	0.00025	0	0	0	0	0	0	0	0	0	8e-05	6e-05	0.003	9e-05	5e-05	2e-05	0	0	0	0	0	0	0	0
1262777	Clostridium sp. CAG:167	1e-05	1e-05	4e-05	3e-05	0.00012	2e-05	1e-05	1e-05	1e-05	1e-05	1e-05	2e-05	0	0	0	0	0	0	0	2e-05	1e-05	8e-05	0	3e-05	1e-05	0	0	0	0	0	0	0	0	0	2e-05	0.00019	3e-05	0	1e-05	0	0	0	0	0	0	0	0	0
1262782	Clostridium sp. CAG:230	1e-05	3e-05	9e-05	0.00038	3e-05	3e-05	3e-05	2e-05	4e-05	2e-05	2e-05	5e-05	0	0	0	0	0	0	4e-05	0.0002	0.00013	1e-05	0	0.00018	2e-05	0	0	0	0	0	0	0	0	2e-05	2e-05	4e-05	0.00011	3e-05	1e-05	0	0	0	0	0	0	0	0	0
1262830	Clostridium sp. CAG:632	1e-05	1e-05	2e-05	0.00026	2e-05	1e-05	1e-05	2e-05	2e-05	2e-05	2e-05	1e-05	0	0	0	0	0	0	1e-05	2e-05	2e-05	1e-05	0	2e-05	1e-05	0	0	0	0	0	0	0	0	0	3e-05	2e-05	0.00021	1e-05	1e-05	0	0	0	0	0	0	0	0	0
1262803	Clostridium sp. CAG:413	1e-05	2e-05	5e-05	0.02534	6e-05	2e-05	0.00017	0.00041	4e-05	2e-05	2e-05	0.00012	0	0	0	0	0	0	0.00019	1e-05	1e-05	0.00019	0.04298	0.00051	1e-05	0	0	0	0	0	0	0	0	1e-05	2e-05	7e-05	0.02606	0	5e-05	6e-05	0	0	0	0	0	0	0	0
1262778	Clostridium sp. CAG:169	1e-05	2e-05	2e-05	5e-05	0.00043	1e-05	0.00106	3e-05	5e-05	2e-05	1e-05	3e-05	0	0	0	0	0	0	2e-05	2e-05	0.00052	0.0001	0	0.00027	4e-05	0	0	0	0	0	0	0	0	1e-05	1e-05	0.0001	5e-05	1e-05	0.00012	7e-05	0	0	0	0	0	0	0	0
1262780	Clostridium sp. CAG:221	1e-05	0	0.00014	2e-05	0	1e-05	2e-05	0	0	1e-05	0.00013	1e-05	0	0	0	0	0	0	0	0	0	1e-05	0	0	0	0	0	0	0	0	0	0	0	0	0	6e-05	2e-05	1e-05	0	0	0	0	0	0	0	0	0	0
1262775	Clostridium sp. CAG:138	1e-05	2e-05	2e-05	0.00281	4e-05	1e-05	0.00128	5e-05	3e-05	1e-05	2e-05	6e-05	0	0	0	0	0	0	1e-05	1e-05	1e-05	0.00014	0	0.0011	3e-05	0	0	0	0	0	0	0	0	0	3e-05	7e-05	0.0002	0	6e-05	4e-05	0	0	0	0	0	0	0	0
1262809	Clostridium sp. CAG:451	1e-05	0	0	0.00688	1e-05	0	2e-05	0	0	0	0	0	0	0	0	0	0	0	0	0	0	2e-05	0	0	0	0	0	0	0	0	0	0	0	0	1e-05	6e-05	0.00564	0	0	1e-05	0	0	0	0	0	0	0	0
1263067	Clostridium hathewayi CAG:224	1e-05	1e-05	2e-05	2e-05	4e-05	1e-05	1e-05	1e-05	3e-05	1e-05	1e-05	2e-05	0	0	0	0	0	0	1e-05	1e-05	1e-05	1e-05	0	1e-05	8e-05	0	0	0	0	0	0	0	0	0	2e-05	2e-05	2e-05	1e-05	0.0002	1e-05	0	0	0	0	0	0	0	0
1262768	Clostridium sp. CAG:1000	0	0	0	1e-05	2e-05	0	0	0	0	0	0	0	0	0	0	0	0	0	0	0	0	0	0	0	0	0	0	0	0	0	0	0	0	0	0	2e-05	1e-05	0	0	0	0	0	0	0	0	0	0	0
1262779	Clostridium sp. CAG:217	0	1e-05	0.00242	7e-05	0.01548	0.00691	0.0001	0.12039	1e-05	0.01159	0.01486	2e-05	0	8e-05	0	0	0	0	5e-05	1e-05	5e-05	6e-05	0	0.01973	0.03542	0	0	0	0	6e-05	0	0	0	1e-05	0.03442	5e-05	0.00011	0	3e-05	0.02669	0	0	0	0	0	0	6e-05	0
1262787	Clostridium sp. CAG:265	2e-05	1e-05	1e-05	1e-05	0	0	0	0	0	0	3e-05	0	0	0	0	0	0	0	0	1e-05	0	0	0	0	0	0	0	0	0	0	0	0	0	0	2e-05	1e-05	2e-05	0	0	0	0	0	0	0	0	0	0	0
1262770	Clostridium sp. CAG:1024	0	1e-05	2e-05	0.00016	7e-05	1e-05	0.00015	2e-05	2e-05	3e-05	2e-05	3e-05	0	0	0	0	0	0	3e-05	1e-05	1e-05	0.00019	0	3e-05	3e-05	0	0	0	0	0	0	0	0	1e-05	1e-05	0.00016	0.00014	1e-05	8e-05	5e-05	0	0	0	0	0.00019	0	0	0
1262831	Clostridium sp. CAG:678	0	0	3e-05	5e-05	1e-05	7e-05	5e-05	2e-05	1e-05	1e-05	6e-05	1e-05	0	0	0	0	0	0	1e-05	1e-05	2e-05	2e-05	0	6e-05	2e-05	0	0	0	0	0	0	0	0	0	2e-05	2e-05	6e-05	0	6e-05	2e-05	0	0	0	0	0	0	0	0
1262808	Clostridium sp. CAG:448	0	0	1e-05	8e-05	2e-05	1e-05	6e-05	3e-05	1e-05	1e-05	1e-05	1e-05	0	0	0	0	0	0	1e-05	0	1e-05	2e-05	0	2e-05	1e-05	0	0	0	0	0	0	0	0	0	2e-05	2e-05	8e-05	0	1e-05	2e-05	0	0	0	0	0	0	0	0
1262793	Clostridium sp. CAG:302	0	0	1e-05	5e-05	0.00025	0	2e-05	0	0	0	5e-05	0	0	0	0	0	0	0	0	0.00043	0	0	0	0.00052	1e-05	0.00336	0	0	0	2e-05	2e-05	0.0008	0	0	1e-05	0.00145	7e-05	0	0	0	0	0	0	0	0.00875	0	0.00139	0
1262769	Clostridium sp. CAG:1013	0	1e-05	2e-05	3e-05	2e-05	9e-05	4e-05	4e-05	4e-05	2e-05	2e-05	2e-05	0	0	0	0	0	0	2e-05	1e-05	9e-05	5e-05	0	3e-05	0.0007	0	0	0	0	0	0	0	0	1e-05	5e-05	3e-05	3e-05	1e-05	0.0002	0.00039	0	0	0	0	0	0	0	0
1262841	Clostridium sp. CAG:798	0	0	2e-05	4e-05	0	0	0	0	0	0	0	1e-05	0	0	0	0	0	0	0	0	0	8e-05	0	1e-05	0	0	0	0	0	0	0	0	0	0	1e-05	5e-05	4e-05	0	0	3e-05	0	0	0	0	0	3e-05	0	0
1262820	Clostridium sp. CAG:567	0	0	2e-05	0.00011	0	0	0	0	0	0	1e-05	1e-05	0	0	0	0	0	0	0	1e-05	0	6e-05	0	4e-05	0	0	0	0	0	0	0	0	0	0	0	5e-05	7e-05	0	0	3e-05	0	0	0	0	0	0	0	0
1262800	Clostridium sp. CAG:356	0	0	0.00037	0.00058	0	0	1e-05	0	0	1e-05	0.00053	2e-05	0	0	0	0	0	0	0	1e-05	0	8e-05	0	0.00019	0	0	0	0	0	0	0	0	0	0	3e-05	0.00015	0.00052	0	0	5e-05	0	0	0	0	0	0	0	0
1262840	Clostridium sp. CAG:793	0	0	2e-05	3e-05	0	0	0	0	0	0	0	1e-05	0	0	0	0	0	0	0	0	0	1e-05	0	1e-05	0	0	0	0	0	0	0	0	0	0	1e-05	4e-05	3e-05	0	0	2e-05	0	0	1e-05	0	0	0	0	0
1262783	Clostridium sp. CAG:242	1e-05	1e-05	1e-05	6e-05	0.0001	0	1e-05	2e-05	8e-05	0.00025	0	0	0	0	0	0	0	0	1e-05	1e-05	0.00013	2e-05	0	3e-05	1e-05	0	0	0	0	0	0	0	0	0	2e-05	2e-05	6e-05	1e-05	8e-05	2e-05	0	0	0	0	0	0	0	0
1262834	Clostridium sp. CAG:715	1e-05	0	0	2e-05	0	0	0	0	0	0	0	0	0	0	0	0	0	0	0	0	0	0	0	0	0	0	0	0	0	0	0	0	0	0	0	0	1e-05	0	0	0	0	0	0	0	0	0	0	0
1262827	Clostridium sp. CAG:609	0	0	0	0.00014	0	0	0	0	0	0	0	0	0	0	0	0	0	0	0	0	0	1e-05	0	0	0	0	0	0	0	0	0	0	0	0	0	7e-05	0.00023	0	0	0	0	0	0	0	0	0	0	0
1262822	Clostridium sp. CAG:571	0	0	4e-05	5e-05	0	0	0	0	0	0	1e-05	1e-05	0	0	0	0	0	0	0	0	0	3e-05	0	1e-05	0	0	0	0	0	0	0	0	0	0	1e-05	6e-05	5e-05	0	1e-05	8e-05	0	0	0	0	0	0	0	0
1262818	Clostridium sp. CAG:533	0	0	0	2e-05	0	0	0	0	0	0	0	0	0	0	0	0	0	0	0	0	0	0	0	0	0	0	0	0	0	0	0	0	0	0	1e-05	5e-05	1e-05	0	0	0	0	0	0	0	0	0	0	0
1262795	Clostridium sp. CAG:307	0	0	5e-05	1e-05	0	0	0	0	0	0	1e-05	0	0	0	0	0	0	0	0	0	0	0	0	0	0	0	0	0	0	0	0	0	0	0	0	0	0	0	1e-05	0	0	0	0	0	0	0	0	0
1262810	Clostridium sp. CAG:452	0	0	3e-05	4e-05	0	0	0	0	0	0	1e-05	0	0	0	0	0	0	0	0	0	0	3e-05	0	2e-05	0	0	0	0	0	0	0	0	0	0	3e-05	5e-05	4e-05	0	0	3e-05	0	0	0	0	0	0	0	0
1262789	Clostridium sp. CAG:273	0	0	4e-05	4e-05	0	0	0	0	0	0	1e-05	1e-05	0	0	0	0	0	0	0	1e-05	0	4e-05	0	5e-05	0	0	0	0	0	0	0	0	0	0	2e-05	5e-05	4e-05	0	0	4e-05	0	0	0	0	2e-05	0	0	0
1262838	Clostridium sp. CAG:768	0	0	0	1e-05	0	0	0	0	0	0	0	0	0	0	0	0	0	0	0	0	0	0	0	0	0	0	0	0	0	0	0	0	0	0	0	0	1e-05	0	0	0	0	0	0	0	0	0	0	0
1262788	Clostridium sp. CAG:269	0	0	7e-05	0.00124	0	0	1e-05	0	0	0	2e-05	1e-05	0	0	0	0	0	0	0	1e-05	1e-05	0.00036	0.02131	0.00151	0	0	0	0	0	0	0	0	0	0	0.0032	0.00289	0.00089	0	0	0.0001	0	0	0	0	0	0	0	0
1262847	Clostridium sp. CAG:921	0	0	1e-05	0.00167	0	0	0	0	0	0	0	0	0	0	0	0	0	0	0	0	0	1e-05	0	0	0	0	0	0	0	0	0	0	0	0	0	2e-05	0.00053	0	0	0	0	0	0	0	0	0	0	0
1262823	Clostridium sp. CAG:575	0	0	0.00027	0.00012	0	0	0	0	0	0	3e-05	7e-05	0	0	0	0	0	0	0	1e-05	0	7e-05	0	1e-05	0	0	0	0	0	0	0	0	0	0	4e-05	0.00014	5e-05	0	0	0.0003	0	0	0	0	0	0	0	0
1262815	Clostridium sp. CAG:508	0	0	2e-05	0.00201	0	0	0	0	0	0	0	0	0	0	0	0	0	0	0	0	0	1e-05	0	1e-05	0	0	0	0	0	0	0	0	0	0	0	4e-05	0.00096	0	0	3e-05	0	0	0	0	0	0	0	0
1262819	Clostridium sp. CAG:557	0	0	0	0	0	0	0	0	0	0	0	0	0	0	0	0	0	0	0	0	0	0	0	0	0	0	0	0	0	0	0	0	0	0	0	0	0	0	0	0	0	0	0	0	0	0	0	0
411484	Clostridium sp. SS2/1	0.01051	0.00239	0.00197	0.00036	0.00619	0.00401	0.00011	0.00152	0.01326	0.00015	0.00613	0.00026	0.00196	0.00154	0.00028	0.00241	0.00128	0.0008	0.00073	0.00598	0.00084	0.00044	0	0.00017	0.00173	0.0003	0.00169	0.00315	0.00274	0.00012	0.00172	0.00063	0.0008	0.00178	0.00242	0.00156	0.00027	0.00679	0.00285	5e-05	0.00469	0.00038	0.00077	0.0006	0.00105	0.00037	0.00093	0.01026
411489	Clostridium sp. L2-50	0.00051	0.00067	0.00011	0.00015	0.00047	0.0001	0.00319	0.00014	0.0001	7e-05	0.00013	4e-05	4e-05	5e-05	3e-05	4e-05	0.00031	4e-05	6e-05	0.00063	0.0001	7e-05	0	0.00651	0.00017	0.00047	0	5e-05	0.0002	3e-05	0	3e-05	3e-05	2e-05	0.00026	0.00801	0.00017	5e-05	0.00034	0.0001	0.00041	0	5e-05	0	0	0.00309	0	7e-05
1776047	Clostridium sp. C105KSO15	0.00054	0.00059	0.00042	0.00127	0.0004	0.0008	0.00049	0.00044	0.00042	0.00041	0.00065	0.00369	3e-05	0	3e-05	0	0.00014	0.00014	0.0005	0.00078	0.00069	0.00057	0	0.0007	0.0009	2e-05	5e-05	0	0	0	0.00012	0	3e-05	0.00034	0.00029	0.00101	0.00103	0.00037	0.00055	0.00035	0	0	0.00041	0.00024	2e-05	6e-05	4e-05	0
1042156	Clostridium sp. SY8519	0.00024	0.0002	3e-05	6e-05	5e-05	3e-05	3e-05	1e-05	3e-05	4e-05	4e-05	4e-05	0	0	0	0.00162	0.00019	3e-05	1e-05	0.00024	2e-05	3e-05	0	5e-05	4e-05	0	3e-05	0	0	0	2e-05	2e-05	0	3e-05	4e-05	2e-05	6e-05	2e-05	1e-05	1e-05	5e-05	8e-05	0.00011	0	0.00128	0.00032	0	2e-05
1720194	Clostridium sp. AT4	0.00017	0.00011	0.00039	0.00041	0.00017	0.00043	5e-05	0.00019	0.00085	7e-05	0.00022	0.0001	0	0	0	0	0	0	0.00038	0.00019	0.00017	0.00011	0	0.00012	0.00059	2e-05	0.0011	0	0	0	0	2e-05	2e-05	0.00013	0.00025	0.0001	0.00038	0.00041	7e-05	3e-05	0	4e-05	0	0	2e-05	0	0	0
1650661	Clostridium phoceensis	0.00016	0.00039	0.00017	0.00017	0.00045	0.00064	0.00221	0.00358	0.00072	0.00038	0.00015	0.00308	0	0	0	0	0	0	0.00127	0.00032	9e-05	0.0023	0	0.00022	0.00044	0	0	0	0	0	0	0	0	0.00146	0.00426	0.00084	0.00027	0.00066	0.00142	0.0004	0	0	0	0	0	0	0	0
1776045	Clostridium sp. C105KSO13	0.00013	0.0001	0.0001	0.00084	0.00018	0.00021	0.00011	6e-05	9e-05	7e-05	0.00012	0.00042	6e-05	0	4e-05	0.0099	0.00357	0	7e-05	0.00013	0.00017	6e-05	0	0.00013	0.00011	8e-05	0.00019	3e-05	0.00015	0.00048	0	9e-05	0.00035	8e-05	7e-05	0.0002	0.00124	5e-05	0.0007	5e-05	0.00032	0	0.00018	5e-05	0	4e-05	0.00011	0.00017
1226325	Clostridium sp. KLE 1755	0.0001	0.0001	2e-05	0.00015	8e-05	4e-05	6e-05	0.00011	0.00028	4e-05	5e-05	6e-05	2e-05	0	4e-05	0	4e-05	0	0.00017	7e-05	9e-05	8e-05	0	7e-05	0.00017	0	0	0	0	0	0	2e-05	2e-05	4e-05	0.00042	0.00257	0.00014	6e-05	9e-05	3e-05	0	0	1e-05	2e-05	0	0	0	0
1776383	Clostridium sp. SN20	9e-05	0.00027	0.00026	0.00018	0.00025	0.00014	0.00023	0.0005	0.00013	0.00021	0.00013	0.00011	0	0	0	3e-05	0	0	0.00029	0.00022	0.00017	0.00015	0	9e-05	9e-05	0	0	0	0	0	0	0	0	0.0005	0.00032	0.00033	0.00017	6e-05	0.00131	0.00018	0	0	0	0	0	0	0	0
97139	Clostridium sp. ASF502	4e-05	4e-05	7e-05	5e-05	5e-05	9e-05	4e-05	4e-05	8e-05	0.00031	0.00011	3e-05	0	0	0	0	0	0	7e-05	6e-05	6e-05	5e-05	0	5e-05	8e-05	0	0	0	0	0	0	0	0	3e-05	0.00031	4e-05	5e-05	2e-05	3e-05	2e-05	0	0	0	0	0	0	0	0
1896986	Clostridium sp. CAG:245_30_32	5e-05	0.00017	0.00014	0.00032	0.00048	6e-05	0.00032	9e-05	0.00049	5e-05	0.00024	0.00103	0	0	0	0	0	0	0.0005	0.00153	6e-05	0.0007	0	0.00012	0.00019	0	0	0	0	0	0	0	0	2e-05	0.00026	0.00035	0.0009	0.00043	2e-05	0.00027	0	0	0	0	0	0	0	0
1491	Clostridium botulinum	3e-05	4e-05	2e-05	4e-05	3e-05	3e-05	3e-05	3e-05	3e-05	2e-05	2e-05	2e-05	0	0	0	0	4e-05	0	1e-05	3e-05	2e-05	4e-05	0	2e-05	7e-05	9e-05	0	0	0	5e-05	0	0	0	1e-05	3e-05	3e-05	3e-05	1e-05	2e-05	3e-05	0	0	0	2e-05	0	0	0	0
1896982	Clostridium sp. 29_15	9e-05	9e-05	3e-05	1e-05	6e-05	0.00015	5e-05	1e-05	0.0001	7e-05	0.00012	1e-05	0	0	0	0	0	0	4e-05	6e-05	0.00023	2e-05	0	3e-05	2e-05	0	0	0	0	0	0	0	0	0.00012	0.00022	1e-05	2e-05	1e-05	7e-05	1e-05	0	0	0	0	0	0	0	0
1805471	Clostridium sp. Marseille-P2415	2e-05	1e-05	1e-05	3e-05	1e-05	1e-05	1e-05	1e-05	1e-05	1e-05	1e-05	1e-05	0	0	0	0	0	0	1e-05	1e-05	2e-05	1e-05	0	1e-05	1e-05	0	0	0	0	0	0	0	0	0	1e-05	2e-05	3e-05	0	1e-05	1e-05	0	0	0	0	0	0	0	0
36834	Clostridium celatum	2e-05	2e-05	1e-05	1e-05	0	0	0	0	0	0	0	0	0.00058	0.00081	0.00059	0.00084	0.00111	0.00086	0	0	0	0	0	0	0	0.00032	0.00074	0.00109	0.00195	0.00042	0.00056	0.0003	0.00081	0	0	1e-05	1e-05	0	0	0	0.00219	0.00044	0.00033	0.00067	0.00062	0.00055	0.0007	0.00093
1882754	Clostridium sp. DSM 4029	2e-05	4e-05	0.00013	0.00013	0.00024	0.00012	0.00049	5e-05	0.00018	0.00052	0.00018	0.00041	0	0	0	0	0	0	0.00014	7e-05	0.00035	0.00081	0	0.00015	0.00072	0	0	0	0	0	0	0	0	1e-05	0.00051	0.00028	0.00011	0.00011	0.00104	0.00052	0	0	0	0	0	0	0	0
1805477	Clostridium sp. Marseille-P299	1e-05	1e-05	1e-05	3e-05	1e-05	1e-05	0	1e-05	0	0	1e-05	1e-05	0	0	0	0	0	0	0	1e-05	0	0	0	1e-05	0	0	0	0	0	0	0	0	0	0	0	1e-05	3e-05	0	0	1e-05	0	0	0	0	0	0	0	0
1849176	Clostridium sp. W14A	1e-05	1e-05	1e-05	3e-05	2e-05	1e-05	3e-05	2e-05	7e-05	2e-05	1e-05	4e-05	2e-05	0.00018	0	9e-05	0	0.00021	0.0001	1e-05	1e-05	4e-05	0	3e-05	5e-05	5e-05	0.00019	6e-05	0.00016	9e-05	0.0001	0.00018	5e-05	1e-05	2e-05	4e-05	3e-05	6e-05	5e-05	3e-05	0	0.00015	0.0003	0.00013	7e-05	0.00014	0.00028	5e-05
1871020	Clostridium sp. Marseille-P3244	1e-05	1e-05	0.0001	0.00016	8e-05	0.00021	0.00024	0.00032	7e-05	0.00021	0.00027	0.00011	0	0	0	0	0	0	0.00015	2e-05	0.00064	0.0002	0	0.00023	5e-05	0	0	0	0	0	0	0	0	1e-05	0.00018	0.00019	0.00016	1e-05	0.00055	5e-05	0	0	0	0	0	0	0	0
1946357	Clostridium sp. UBA3947	1e-05	1e-05	1e-05	4e-05	1e-05	2e-05	1e-05	1e-05	1e-05	1e-05	2e-05	9e-05	0	0	0	0	0	0	1e-05	2e-05	2e-05	1e-05	0	2e-05	2e-05	0	0	0	0	0	0	0	0	1e-05	1e-05	2e-05	3e-05	1e-05	1e-05	1e-05	0	0	0	0	0	0	0	0
1095009	Clostridium sp. NkU-1	1e-05	1e-05	0	2e-05	1e-05	0	1e-05	1e-05	0	1e-05	1e-05	1e-05	0	0	0	0	0	0	2e-05	1e-05	1e-05	2e-05	0	2e-05	1e-05	0	0	0	0	0	0	0	0	0	1e-05	1e-05	2e-05	0	1e-05	1e-05	0	0	0	0	0	0	0	0
1896979	Clostridium sp. 27_14	1e-05	0	0.0002	0.00096	0	0	0	1e-05	0	0	2e-05	4e-05	0	2e-05	0	0	0	0	0	1e-05	0	0.0002	0	0.00013	0	0	0	0	0	2e-05	0	0	2e-05	0	1e-05	0.00049	0.00028	0	0	0.00025	0	0	0	0	0	0	0	0
29363	Clostridium paraputrificum	1e-05	0	0	2e-05	0	0	1e-05	2e-05	1e-05	1e-05	0	1e-05	0	0	0	0	0	0	0	0	2e-05	0	0	1e-05	2e-05	5e-05	0	0	0	0	0	0	0	2e-05	1e-05	2e-05	2e-05	1e-05	0	1e-05	0	0	0	0	3e-05	0	0	0
1501	Clostridium pasteurianum	1e-05	0	0	1e-05	0	1e-05	0	0	0	0	1e-05	1e-05	0	0	0	0	0	0	0	0	0	0	0	1e-05	0	0	0	0	0	0	0	0	0	0	0	1e-05	1e-05	0	0	0	5e-05	0	0	0	2e-05	0	0	0
556261	Clostridium sp. D5	2e-05	4e-05	2e-05	2e-05	7e-05	0.0001	2e-05	2e-05	0.00023	6e-05	0.00017	4e-05	0	0	0	0	0	0	3e-05	5e-05	0.00022	9e-05	0	4e-05	0.00103	0	0	0	0	0	0	0	0	2e-05	5e-05	6e-05	1e-05	3e-05	7e-05	5e-05	0	0	0	0	0	0	0	0
100174	Clostridium peptidivorans	1e-05	0	0	1e-05	0	1e-05	0	0	0	0	0	1e-05	0	0	0	0	0	0	0	0	1e-05	0	0	0	0	0	0	0	0	0	0	0	0	0	0	1e-05	1e-05	0	0	0	0	0	0	0	0	0	0	0
1946364	Clostridium sp. UBA4746	1e-05	1e-05	1e-05	2e-05	1e-05	1e-05	0	0	1e-05	1e-05	1e-05	5e-05	0	0	0	0	0	0	1e-05	1e-05	1e-05	1e-05	0	1e-05	1e-05	0	0	0	0	0	0	0	0	0	0	2e-05	1e-05	1e-05	1e-05	0	0	0	0	0	0	0	0	0
29367	Clostridium puniceum	1e-05	0	0	1e-05	0	0	0	0	0	0	0	0	0	0	0	0	0	0	0	0	0	0	0	0	0	0	0	0	0	0	0	0	0	0	0	1e-05	1e-05	0	0	0	0	0	0	0	0	0	0	0
1495	Clostridium cylindrosporum	1e-05	0	0	1e-05	0	0	0	0	0	0	0	0	2e-05	0	0	0	0	0	0	0	0	0	0	0	0	0	0	0	5e-05	0	0	0	0	0	0	0	1e-05	0	0	0	0	0	0	0	2e-05	0	4e-05	0
1520	Clostridium beijerinckii	1e-05	1e-05	1e-05	3e-05	1e-05	2e-05	0	0	1e-05	1e-05	1e-05	0	0	0	2e-05	0	0.00012	0	0	1e-05	0	0	0	0	1e-05	8e-05	0	3e-05	0	0	5e-05	0	0	1e-05	1e-05	1e-05	3e-05	0	1e-05	1e-05	5e-05	0	1e-05	2e-05	0.00012	0	6e-05	0
1449050	Clostridium sp. KNHs205	1e-05	1e-05	1e-05	5e-05	1e-05	1e-05	1e-05	1e-05	1e-05	0	1e-05	1e-05	0	0.00016	2e-05	0.0001	4e-05	0	0	1e-05	0	0	0	1e-05	1e-05	0	3e-05	6e-05	5e-05	4e-05	3e-05	0	0.00015	1e-05	1e-05	1e-05	4e-05	0	0	1e-05	6e-05	0	3e-05	2e-05	2e-05	0	4e-05	5e-05
1637501	Clostridium sp. K4410.MGS-306	5e-05	0	0	1e-05	1e-05	1e-05	0	0	3e-05	0	1e-05	0	0	0	0	0	0	0	0	0	0	1e-05	0	0	0	0	0	0	0	0	0	0	0	0	1e-05	1e-05	0	1e-05	0.00035	0	0	0	0	0	0	0	0	0
1816694	Clostridium sp. Marseille-P2538	1e-05	1e-05	1e-05	3e-05	2e-05	1e-05	2e-05	2e-05	1e-05	2e-05	1e-05	1e-05	0	0	0	0	0	0	1e-05	1e-05	2e-05	1e-05	0	1e-05	1e-05	0	0	0	0	0	0	0	0	0	5e-05	1e-05	2e-05	0	0.00016	1e-05	0	0	0	0	0	0	0	0
225345	Clostridium chromiireducens	1e-05	0	0	1e-05	0	0	0	0	0	0	0	0	0	0	0	0	0	0	0	0	0	0	0	0	0	0	0	0	0	0	0	0	0	0	0	0	0	0	0	0	0	0	0	0	0	0	0	0
238834	Clostridium estertheticum	1e-05	0	0	1e-05	0	0	0	0	0	0	0	0	0	0	2e-05	0	0.00014	3e-05	0	0	0	0	0	0	0	3e-05	0	0	0	0	0	0	0	0	0	0	1e-05	0	0	0	0	0	0	0	3e-05	0	0	0
1540257	Clostridium sp. KNHs214	1e-05	1e-05	3e-05	7e-05	6e-05	3e-05	7e-05	1e-05	9e-05	7e-05	5e-05	4e-05	0	0	0	0	0	0	3e-05	2e-05	1e-05	0.00013	0	2e-05	0.0001	0	0	3e-05	0	0	2e-05	0	0	3e-05	5e-05	7e-05	7e-05	3e-05	2e-05	2e-05	0	0	0	0	0.00013	0	0	0
1761781	Clostridium sp. DSM 8431	1e-05	1e-05	0	2e-05	0	0	0	0	0	0	0	1e-05	0	0	0	0	0	0	0	0	0	0	0	0	0	0	0	0	0	0	0	0	0	0	0	1e-05	2e-05	0	0	0	0	0	0	0	0	0	0	0
1805470	Clostridium nigeriense	1e-05	0	1e-05	1e-05	0	0	0	0	0	0	0	0	0	0	0	0	0	0	0	0	1e-05	0	0	0	0	0	0	0	0	0	0	0	0	0	0	4e-05	1e-05	0	0	0	0	0	0	0	0	0	0	0
1896977	Clostridium sp. 26_21	1e-05	0	3e-05	0.00016	0	0	0	0	0	0	1e-05	1e-05	0	0	0	0	0	0	0	0	0	2e-05	0	0.00016	0	0	0	0	0	0	0	0	0	0	0.00035	0.0005	0.00011	0	0	4e-05	0	0	0	0	0	0	0	0
2045012	Clostridium minihomine	0	0	1e-05	2e-05	1e-05	1e-05	2e-05	1e-05	1e-05	1e-05	1e-05	0	0	0	0	0	0	0	1e-05	0	1e-05	1e-05	0	2e-05	1e-05	0	0	0	0	0	0	0	0	0	1e-05	2e-05	2e-05	0	3e-05	1e-05	0	0	0	0	0	0	0	0
747377	Clostridium sp. DMHC 10	0	0	0	1e-05	0	0	0	0	0	0	0	0	0	0	0	0	0	0	0	0	0	0	0	0	0	0	0	0	0	0	0	0	0	0	0	0	1e-05	0	0	0	0	0	0	0	0	0	0	0
84024	Clostridium disporicum	0	0	0	1e-05	0	0	0	0	0	0	0	0	0	0	0	0	0	0	0	0	0	0	0	0	0	0	0	0	0	0	9e-05	0	0	0	0	0	1e-05	0	0	0	0.00024	0	0	0	0	0	0	0
1492	Clostridium butyricum	0	0	0	2e-05	0	0	0	0	0	0	1e-05	0	0	0	0	0	0	0	0	0	0	0	0	0	0	0	0	0	0	0	0	0	0	0	0	0	2e-05	0	1e-05	0	0	0	0	0	0	0	0	0
36845	Clostridium intestinale	0	0	0	2e-05	0	0	0	0	0	0	0	0	0	0	0	0	0	0	0	0	0	0	0	0	0	3e-05	0	0	0	0	0	0	0	0	0	1e-05	2e-05	0	0	0	0	0	0	0	0	0	0	0
1529	Clostridium cadaveris	0	0	0	0	0	0	0	0	0	0	0	0	0	0	0	0	0	0	0	0	0	0	0	0	0	0	0	0	0	0	0	0	0	0	0	0	1e-05	0	0	0	0	0	0	0	0	0	0	0
1493	Clostridium cellulovorans	0	0	0	1e-05	0	0	0	0	0	0	0	0	0	0	0	0	0	0	0	0	0	0	0	0	0	0	0	0	0	0	0	0	0	0	0	1e-05	1e-05	0	0	0	0	0	0	0	0	0	0	0
84698	Clostridium frigidicarnis	0	0	0	0	0	0	0	0	0	0	0	0	0	0	0	0	0	0	0	0	0	0	0	0	0	0	0	0	0	0	0	0	0	0	0	0	0	0	1e-05	0	0	0	0	0	0	0	0	0
1896978	Clostridium sp. 26_22	0	0	0.00029	0.00021	1e-05	0	1e-05	1e-05	0	0	4e-05	9e-05	0	0	0	0	0	0	0	1e-05	0	0.00011	0	3e-05	0	0	0	0	0	0	0	0	0	0	0.0003	0.00031	8e-05	0	1e-05	0.00037	0	0	0	0	0	0	0	0
1354301	Clostridium sp. BL8	0	0	0	1e-05	0	0	0	0	0	0	0	0	0.04293	0.03803	0.0193	0.01478	0.02027	0.0434	0	0	0	0	0	0	0	0.04892	0.02689	0.0062	0.00429	0.03207	0.01679	0.04153	0.04122	0	0	0	1e-05	0	0	0	0.00371	0.02964	0.10043	0.04091	0.00337	0.04803	0.00308	0.02533
36745	Clostridium saccharoperbutylacetonicum	0	0	0	1e-05	0	0	0	0	0	0	0	0	0	0	0	0	0	0	0	0	0	0	0	0	0	0	0	0	0	0	0	0	0	0	0	0	1e-05	0	0	0	0	0	0	0	0	0	0	0
1551	Clostridium aurantibutyricum	1e-05	0	0	1e-05	1e-05	0	0	0	0	0	0	0	0	0	0	0	0	0	0	0	0	0	0	0	0	0	0	0	0	0	0	0	0	0	0	0	0	0	0	0	0	0	0	0	0	0	0	0
1499684	Clostridium sp. CL-2	0	0	0	1e-05	0	0	0	0	0	0	0	0	0	0	0	7e-05	0	0	0	0	0	0	0	0	0	0	0	0	0	0	0	0	0	0	0	1e-05	2e-05	0	0	0	0.00048	0	0	0	0	0	0	0
457396	Clostridium sp. 7_2_43FAA	0	0	0	1e-05	0	0	0	0	0	0	0	0	0	0	0	0	0	0	0	0	0	0	0	0	0	0	0	0	0	0	0	0	0	0	0	2e-05	1e-05	0	0	0	0	0	0	0	0	0	0	0
1499683	Clostridium sp. CL-6	0	0	0	1e-05	0	0	0	0	0	0	0	0	0	0	0	0	0	0	0	0	0	0	0	0	1e-05	0	0	0	0	0	0	0	0	0	0	1e-05	0	0	0	0	0	0	0	0	0	0	0	0
1946346	Clostridium sp. UBA1056	0	0	0	1e-05	0	0	0	0	0	0	0	0	0	0	0	0	0	0	0	0	0	0	0	0	0	0	0	0	0	0	0	0	0	0	0	0	1e-05	0	0	0	0	0	0	0	0	0	0	0
1848158	Clostridium sp. Bc-iso-3	0	0	0	3e-05	2e-05	1e-05	2e-05	1e-05	1e-05	1e-05	1e-05	0	0	0	0	0	0	0	0	0	3e-05	0	0	1e-05	0	0	0	0	0	0	0	0	0	0	1e-05	2e-05	3e-05	0	0.00045	7e-05	0	0	0	0	0	0	0	0
97138	Clostridium sp. ASF356	0	0	1e-05	3e-05	1e-05	0	1e-05	0	0	0	0	0	0	2e-05	0	0	0	8e-05	0	1e-05	0	0	0	0	0	8e-05	0	0	0	0	2e-05	4e-05	0	0	2e-05	1e-05	3e-05	0	1e-05	0	0	0	0	0.00016	2e-05	0.00014	0	2e-05
1504	Clostridium septicum	0	0	0	1e-05	0	0	0	0	1e-05	0	0	1e-05	0	0	0	0	0	0	1e-05	0	0	0	0	1e-05	0	0	0	0	0	0	0	0	0	0	0	0	1e-05	1e-05	0	0	0	0	0	0	0	0	0	0
33954	Clostridium magnum	0	0	0	2e-05	0	0	0	0	0	0	0	0	0	2e-05	0	0	0	0	0	0	0	0	0	1e-05	0	0	0	0	0	0	0	0	0	0	0	1e-05	1e-05	0	0	0	0	4e-05	0	0	0	0	0	0
1560217	Clostridium sp. L74	0	0	0	1e-05	0	0	0	0	0	0	0	0	0	0	0	0	0	0	0	0	0	0	0	0	0	0	0	0	0	0	0	0	0	0	0	0	1e-05	0	0	0	0	0	0	0	0	0	0	0
1660094	Clostridium sp. SCN 57-10	0	0	0	2e-05	2e-05	0	2e-05	1e-05	1e-05	1e-05	0	1e-05	0	0	0	0	0	0	2e-05	0	1e-05	3e-05	0	1e-05	1e-05	0	0	0	0	0	0	0	0	0	1e-05	1e-05	2e-05	0	3e-05	2e-05	0	0	0	0	0	0	0	0
1534	Clostridium kluyveri	0	0	1e-05	2e-05	0	0	0	0	0	1e-05	1e-05	0	0	0	0	0	0	0	0	0	0	0	0	0	0	0	0	0	0	0	0	0	0	0	0	1e-05	2e-05	0	1e-05	0	0	0	0	0	0	0	0	6e-05
1805472	Clostridium mediterraneense	0	0	0	1e-05	0	0	0	1e-05	0	0	0	0	0	0	0	0	0	0	0	0	0	0	0	0	1e-05	0	0	0	0	0	0	0	0	0	0	0	1e-05	0	0	0	0	0	0	0	0	0	0	0
1391647	Clostridium sp. Ade.TY	0	0	0	1e-05	0	0	0	0	0	0	0	0	0	0	0	0	0	0	0	0	0	0	0	0	0	0	0	0	0	0	0	0	0	0	0	1e-05	1e-05	0	0	0	0	0	0	0	0	0	0	0
1347366	Clostridium sp. ND2	0	0	0	1e-05	0	0	0	0	0	0	0	0	0	0	4e-05	0	0.00036	5e-05	0	0	0	0	0	0	0	0.0001	2e-05	3e-05	0	4e-05	2e-05	0	0	0	0	1e-05	0	0	0	0	0	0	0	3e-05	0.00042	0	4e-05	2e-05
1163671	Clostridium sp. 12(A)	0	0	0	3e-05	0	0	0	0	0	0	1e-05	0	0	0	0	0	0	0	0	1e-05	0	0	0	0	0	0	0	0	0	0	0	0	0	0	0	1e-05	2e-05	0	1e-05	0	0	0	0	0	0	0	0	0
1519	Clostridium tyrobutyricum	0	0	0	0	0	0	0	0	0	0	0	0	0	0	2e-05	0	0	0	0	0	0	0	0	0	0	2e-05	0	9e-05	0	0	0	0	0	0	0	0	0	0	0	0	0	0	0	2e-05	0	0	2e-05	0
1325933	Clostridium polynesiense	0	0	0	2e-05	0	0	0	0	0	1e-05	0	0	0	0	0	0	0	0	0	0	1e-05	0	0	0	0	0	0	0	0	0	0	0	0	0	0	0	2e-05	0	1e-05	0	0	0	0	0	0	0	0	0
179628	Clostridium colicanis	0	0	0	1e-05	0	0	0	0	0	0	0	0	8e-05	0.00041	0.00011	0.00016	0.00024	0.00018	0	0	0	0	0	0	0	0.00033	8e-05	0.00015	0.00087	4e-05	0.00016	0.00011	9e-05	0	0	1e-05	1e-05	0	0	0	0.00124	8e-05	5e-05	0.00013	0.00606	0.00014	0.00072	0.00031
219748	Clostridium tunisiense	0	0	0	1e-05	0	0	0	0	0	0	0	0	0	0	0	0	0	0	0	0	0	0	0	0	0	0	0	0	0	0	0	0	0	0	0	0	1e-05	0	0	0	0	0	0	0	0	0	0	0
1962263	Clostridium tepidum	2e-05	2e-05	0	1e-05	1e-05	2e-05	1e-05	2e-05	3e-05	3e-05	1e-05	3e-05	0.00089	0.00145	0.00118	0.00105	0.01098	0.00332	1e-05	1e-05	1e-05	0	0	2e-05	4e-05	0.00414	0.00169	0.0102	0.00205	0.0016	0.0024	0.00087	0.00112	0	1e-05	1e-05	1e-05	0	1e-05	0	0.00294	0.00153	0.00077	0.00658	0.01904	0.00183	0.0037	0.00279
137838	Clostridium neonatale	0	0	0	1e-05	1e-05	0	0	0	0	0	0	0	0	0	0	0	0	0	0	0	0	0	0	0	0	0	0	0	0	0	0	0	0	0	0	0	1e-05	0	0	0	0	0	0	0	0	0	0	0
332101	Clostridium drakei	0	0	0	0	0	0	0	0	0	0	0	0	0	0	0	0	0	0	0	0	0	0	0	0	0	0	0	0	0	0	0	0	0	0	0	0	0	0	0	0	0	0	0	0	0	0	0	0
119641	Clostridium uliginosum	0	0	0	0	0	0	0	0	0	0	0	0	0	0	0	0	0	0	0	0	0	0	0	0	0	0	0	0	0	0	0	0	0	0	0	1e-05	0	0	0	0	0	0	0	0	0	0	0	0
349933	Clostridium hydrogeniformans	0	0	0	0	0	0	0	0	0	0	0	0	0	0	0	0	0	0	0	0	0	0	0	0	0	0	0	0	0	0	0	0	0	0	0	0	0	0	0	0	0	0	0	0	0	0	0	0
1352601	Clostridium sp. LS	0	0	0	0	0	0	0	0	1e-05	0	0	0	0	0	0	0	0	0	1e-05	0	0	0	0	0	0	0	0	0	0	0	0	0	0	0	0	0	0	1e-05	0	0	0	0	0	0	0	0	0	0
29372	Clostridium thermobutyricum	0	0	0	0	0	0	0	0	0	0	0	0	0	0	0	0	0	0	0	0	0	0	0	0	0	0	0	0	0	0	0	0	0	0	0	0	0	0	0	0	0	0	0	0	0	0	0	0
1946352	Clostridium sp. UBA2485	0	0	0	1e-05	0	0	0	0	0	0	0	0	0	0	0	0	0	0	0	0	0	0	0	0	0	0	0	0	0	0	0	0	0	0	0	0	1e-05	0	0	0	0	0	0	0	0	0	0	0
1946374	Clostridium sp. UBA699	0	0	0	0	0	0	1e-05	0	0	0	0	0	0	0	0	0	0	0	0	0	0	0	0	1e-05	0	0	0	0	0	0	0	0	0	0	0	1e-05	0	0	0	1e-05	0	0	0	0	0	0	0	0
46867	Clostridium chauvoei	0	0	0	0	0	0	0	0	0	0	0	0	0	0	0.00019	0	0	0.0001	0	0	0	0	0	0	0	0.00153	0	0	0	0.00051	0	2e-05	0	0	0	1e-05	0	0	0	0	0.00019	4e-05	0	0.00016	0	0	0	0
1542	Clostridium novyi	0	0	0	2e-05	0	0	0	0	0	0	0	0	0	0	0	0	0	0	0	0	0	0	0	0	0	0	0	0	0	0	0	0	0	0	0	1e-05	1e-05	0	0	0	0	0	0	0	0	0	0	0
318464	Clostridium sulfidigenes	0	0	0	0	0	0	0	0	0	0	0	0	0	0	0	0	0	0	0	0	0	0	0	0	0	0	0	0	0	0	0	0	0	0	0	0	0	0	0	0	0	0	0	0	0	0	0	0
1538	Clostridium ljungdahlii	0	0	0	0	0	0	0	0	0	0	0	0	0	0	0	0	0	0	0	0	0	0	0	0	0	0	0	0	0	0	0	0	0	0	0	0	0	0	0	0	0	0	0	0	0	0	0	0
1216932	Clostridium bornimense	0	0	0	1e-05	5e-05	0	0	0	0	0	0	0	0	0	0	0	0	3e-05	0	0	0	0	0	0	0	0	0	0	0	7e-05	0	0	0	0	5e-05	1e-05	0	0	8e-05	0	0	0	1e-05	0	0	0	0	0
1946370	Clostridium sp. UBA6640	0	0	0	0	0	0	0	0	0	0	0	0	0	0	0	0	0	0	0	0	0	0	0	0	0	0	0	0	0	0	0	0	0	0	0	0	0	0	0	0	0	0	0	0	0	0	0	0
1502	Clostridium perfringens	0	0	0	1e-05	0	0	0	0	0	0	0	0	4e-05	4e-05	0	0	0	0	0	0	0	0	0	3e-05	0	5e-05	5e-05	6e-05	0	0	2e-05	0	7e-05	0	0	0	1e-05	0	0	0	0.0002	0	2e-05	5e-05	7e-05	0.00117	2e-05	0
394958	Clostridium taeniosporum	0	0	0	0	0	0	0	0	0	0	0	0	0.00038	0.00255	0.00114	0.00031	0.00065	0.00203	0	0	0	0	0	0	0	0.00149	0.0005	0.00058	0.0022	0.00059	0.00013	0.00132	0.00215	0	0	0	0	0	0	0	0.00105	0.00132	0.0008	0.00065	0.00017	0.00024	0.00054	0.00062
1958780	Clostridium merdae	0	0	0	1e-05	1e-05	0	1e-05	1e-05	1e-05	0	0	0	0	0	0	0	0	0	2e-05	0	1e-05	1e-05	0	2e-05	1e-05	0	0	0	0	0	0	0	0	0	1e-05	1e-05	1e-05	0	2e-05	1e-05	0	0	0	0	0	0	0	0
1121298	Clostridium amylolyticum	0	0	0	1e-05	0	0	0	0	0	0	0	0	0	0	0	0	0	0	0	0	0	0	0	0	0	2e-05	0	0	0	0	0	0	0	0	0	1e-05	1e-05	0	0	0	0	0	0	0	0	0	0	0
84022	Clostridium aceticum	0	0	0	1e-05	0	0	0	0	0	0	0	0	0	0	0	0	0	0	1e-05	0	0	1e-05	0	0	1e-05	0	0	0	0	0	0	0	0	0	0	0	1e-05	0	0	0	0	0	0	0	0	0	0	0
1946375	Clostridium sp. UBA701	0	0	0	1e-05	0	0	0	0	0	0	0	0	0	0	0	0	0	0	0	0	0	0	0	0	0	0	0	0	0	0	0	0	0	0	1e-05	0	1e-05	0	0	0	0	0	0	0	0	0	0	0
1776758	Clostridium sp. N3C	0	0	0	1e-05	0	0	0	0	0	0	0	0	0	0	0	0	0	0	1e-05	0	0	1e-05	0	0	0	0	0	0	0	0	0	0	0	0	0	0	1e-05	0	0	0	0	0	0	0	0	0	0	0
1513	Clostridium tetani	0	0	0	1e-05	0	0	0	0	0	0	0	0	6e-05	8e-05	4e-05	4e-05	4e-05	5e-05	0	0	0	0	0	0	0	5e-05	0	6e-05	0.00024	6e-05	0.0002	4e-05	5e-05	0	0	0	1e-05	0	0	0	0.0001	4e-05	2e-05	5e-05	0	7e-05	0	4e-05
1548	Clostridium scatologenes	0	0	0	0	0	0	0	0	0	0	0	0	0	0	0	0	0	0	0	0	0	0	0	0	0	0	0	0	0	0	0	0	0	0	0	0	0	0	0	0	0	0	0	0	0	0	0	0
1881060	Clostridium sp. USBA 49	0	0	0	1e-05	0	0	0	0	0	0	0	0	0	0	0	0	0	0	0	0	0	0	0	0	0	3e-05	3e-05	0	0	2e-05	0	2e-05	0	0	0	1e-05	1e-05	0	0	0	0	0	1e-05	0	0.00015	0	0	3e-05
2003589	Clostridium sp. BSD9I1	0	0	0	0	0	0	0	0	0	0	0	0	0	0	0	0	0	0	0	0	0	0	0	0	0	0	0	0	0	0	0	0	0	0	0	0	1e-05	0	0	0	0	0	0	0	0	0	0	0
1896980	Clostridium sp. 28_12	0	0	0.0003	0.00047	0	0	0	0	0	0	0.00049	1e-05	0	0	0	0	0	0	0	0	0	0.00013	0	0.00013	0	0	0	0	0	0	0	0	0	0	2e-05	9e-05	0.00045	0	0	3e-05	0	0	0	0	0	0	0	0
1561	Clostridium baratii	0	0	0	1e-05	0	0	0	0	0	0	0	0	2e-05	0	0	0	0.00052	0	0	0	0	0	0	1e-05	0	3e-05	0	0	0	0	0.00014	2e-05	0	0	0	1e-05	1e-05	0	0	0	0	0	0	6e-05	7e-05	7e-05	0	0
29341	Clostridium argentinense	0	0	0	0	0	0	0	0	0	0	0	0	0	2e-05	0	0	8e-05	3e-05	0	0	0	0	0	0	0	5e-05	4e-05	0	0	2e-05	2e-05	0	0	0	0	0	0	0	0	0	0	0	2e-05	4e-05	0.00019	0	0	4e-05
1705578	Clostridium coskatii	0	0	0	0	0	0	0	0	0	0	0	0	0	0	0	0	0	0	0	0	0	0	0	0	1e-05	0	0	0	0	0	0	0	0	1e-05	0	0	1e-05	0	0	0	0	0	0	0	0	0	0	0
420412	Clostridium tepidiprofundi	0	0	0	0	0	0	0	0	0	0	0	0	0	0	0	0	0	0	0	0	0	0	0	0	0	0	0	0	0	0	0	0	0	0	0	1e-05	0	0	0	0	0	0	0	0	2e-05	0	0	0
1676991	Clostridium sp. ATCC 25772	0	0	0	0	0	0	0	0	0	0	0	0	0	0	0	0	0	0	0	0	0	0	0	0	0	0	0	0	0	0	0	0	0	0	0	0	0	0	0	0	0	0	0	0	0	0	0	0
1494	Clostridium cochlearium	0	0	0	1e-05	0	0	0	0	0	0	0	0	0	0	0	0	0	0	0	0	0	0	0	0	0	0	0	0	0	0	0	0	0	0	0	0	1e-05	0	0	0	0	0	0	0	0	0	0	0
349931	Clostridium cavendishii	0	0	0	1e-05	0	0	0	0	0	0	0	0	0	0	0	0	0	0	0	0	0	0	0	0	0	0	0	0	0	0	0	0	0	0	0	0	0	0	0	0	0	0	0	0	0	0	0	0
37659	Clostridium algidicarnis	0	0	0	1e-05	0	0	0	0	0	0	0	0	0	0	0	0	0	0	0	0	0	0	0	0	0	0	0	0	0	0	0	0	0	0	0	0	0	0	0	0	0	0	0	0	0	0	0	0
641107	Clostridium sp. DL-VIII	0	0	0	1e-05	0	0	0	0	0	0	0	0	0	0	0	0	0	0	0	0	0	0	0	0	0	0	0	0	0	0	0	0	0	0	0	0	1e-05	0	0	0	0	0	0	2e-05	2e-05	0	0	0
1946367	Clostridium sp. UBA5530	0	0	0	1e-05	0	0	0	0	0	0	0	0	0	0	0	0	0	0	0	0	0	0	0	0	0	0	0	0	0	0	0	0	0	0	0	0	1e-05	0	0	0	0	0	0	0	0	0	0	0
40575	Clostridium grantii	0	0	0	0	0	0	0	0	0	0	0	0	0	0	0	0	0	3e-05	0	0	0	0	0	0	0	5e-05	0	0	0	0	0	0	0	0	0	0	0	0	0	0	0	0	1e-05	0	0	0	0	0
1946358	Clostridium sp. UBA4108	0	0	0	1e-05	0	0	0	0	0	0	0	0	0	0	0	0	0	0	0	0	0	0	0	0	0	0	0	0	0	0	0	0	0	0	0	0	1e-05	0	0	0	0	0	0	0	0	0	0	0
1095012	Clostridium sp. Hs50	0	0	0	0	0	0	0	0	0	0	0	0	0	4e-05	0	0	0	0	0	0	0	0	0	0	0	2e-05	0	0	5e-05	0	0	0	0	0	0	0	0	0	0	0	0	0	0	0	2e-05	0	0	0
1105031	Clostridium sp. MSTE9	0	0	0	2e-05	1e-05	0	2e-05	0	1e-05	1e-05	0	1e-05	0	0	0	0	0	0	2e-05	0	1e-05	2e-05	0	1e-05	4e-05	0	0	0	0	0	0	0	0	0	1e-05	1e-05	2e-05	0	2e-05	2e-05	0	0	0	0	0	0	0	0
1137848	Clostridium arbusti	0	0	0	1e-05	0	0	0	0	0	0	0	0	4e-05	0	2e-05	2e-05	0.00018	8e-05	0	0	0	0	0	0	0	0.0001	5e-05	0	5e-05	0	4e-05	0	7e-05	0	0	0	1e-05	0	0	0	5e-05	4e-05	1e-05	2e-05	0.00021	0	6e-05	4e-05
349938	Clostridium sp. BL-8	0	0	0	0	0	0	0	0	0	0	0	0	0	0	0	0	0	0	0	0	0	0	0	0	0	0	0	0	0	0	0	0	0	0	0	0	0	0	1e-05	0	0	0	0	0	0	0	0	0
1667357	Clostridium sp. C8	0	0	0	0	0	0	0	0	0	0	0	1e-05	0	0	0	0	0	0	0	0	0	1e-05	0	0	1e-05	0	0	0	0	0	0	0	0	0	0	1e-05	0	0	0	0	0	0	0	0	0	0	0	0
319475	Clostridium lundense	0	0	0	1e-05	0	0	0	0	0	0	0	0	0	0	0	0	0	0	0	0	0	0	0	0	0	0	0	0	0	0	0	0	0	0	0	1e-05	1e-05	0	0	0	0	0	0	0	0	0	0	0
1414721	Clostridium jeddahense	0	0	1e-05	1e-05	0	1e-05	1e-05	0	1e-05	0	0	1e-05	0	0	0	0	0	0	1e-05	0	1e-05	1e-05	0	1e-05	1e-05	0	0	0	0	0	0	0	0	0	0	1e-05	1e-05	0	3e-05	1e-05	0	0	0	0	0	0	0	0
1450648	Clostridium oryzae	0	0	0	2e-05	0	0	0	0	0	0	0	0	0	0	0	0	7e-05	0	0	0	0	0	0	1e-05	0	0	0	0	0	0	0	0	0	0	0	1e-05	1e-05	0	0	0	5e-05	0	0	2e-05	3e-05	0	2e-05	0
1465809	Clostridium senegalense	0	0	0	0	0	0	0	0	0	0	0	0	0	0	0	0	0	0	0	0	0	0	0	0	0	0	0	0	0	0	0	0	0	0	0	0	0	0	0	0	0	0	0	0	0	0	0	0
1470356	Clostridium ihumii	0	0	0	4e-05	0	0	0	0	0	0	0	0	0	0	0	0	0	0	0	0	0	0	0	0	0	0	0	0	0	0	0	0	0	0	0	0	3e-05	0	0	0	0	0	1e-05	0	0	0	0	0
1946372	Clostridium sp. UBA6758	0	0	0	1e-05	0	0	0	0	0	0	0	0	0	0	0	0	0	0	0	0	0	0	0	0	0	0	0	0	0	0	0	0	0	0	0	0	1e-05	0	0	0	0	0	0	0	0	0	0	0
217159	Clostridium carboxidivorans	0	0	0	1e-05	0	0	0	0	0	0	0	0	0	0	0	0	0	0	0	0	0	0	0	0	0	0	0	0	0	0	0	0	0	0	0	0	1e-05	0	0	0	0	0	0	0	0	0	0	0
217158	Clostridium ragsdalei	0	0	0	0	0	0	0	0	0	0	0	0	0	0	0	0	0	0	0	0	0	0	0	0	0	0	0	0	0	0	0	0	0	0	0	0	0	0	0	0	0	0	0	0	0	0	0	0
1896989	Clostridium sp. CAG:354_28_25	0	0	2e-05	3e-05	0	0	0	0	0	0	0	1e-05	0	0	0	0	0	0	0	0	0	3e-05	0	8e-05	0	0	0	0	0	0	0	0	0	0	0.00722	2e-05	3e-05	0	0	1e-05	0	0	0	0	0.00328	0	0	0
1193532	uncultured Butyricicoccus sp.	0.00995	0.00288	0.00117	0.00071	0.00192	0.00095	0.00144	0.00182	0.00205	0.00169	0.00224	0.00325	0	0	0	0	0	0	0.00313	0.00152	0.00261	0.00256	0	0.00293	0.00436	0	0	0	0	0	0	0	0	0.00406	0.00125	0.00155	0.00065	0.00291	0.00045	0.00129	0	0	1e-05	0	0	0	0	0
1828555	Butyricicoccus sp. N15.MGS-46	0.00185	0.00138	0.0012	0.00021	0.00153	0.00097	0.00099	0.00061	0.0015	0.00144	0.00234	0.00359	0	0	0	0	0	0	0.00278	0.00086	0.00096	0.0019	0	0.00114	0.00155	0	0	0	0	0	0	0	0	0.00351	0.00097	0.00066	0.00019	0.00236	0.0003	0.00095	0	0	0	0	0	0	0	0
1828556	Butyricicoccus sp. N54.MGS-46	0.00167	0.00042	0.00049	0.00014	0.00083	0.00045	0.00055	0.00054	0.00099	0.00077	0.00115	0.00176	0.00124	0.00145	0.00084	0.00152	0.00164	0.00232	0.00164	0.00019	0.00084	0.00121	0	0.00097	0.00116	0.0015	0.00166	0.00234	0.00132	0.0015	0.00193	0.00141	0.00161	0.00254	0.00062	0.00043	0.00012	0.00153	0.00021	0.00051	0.00284	0.00132	0.00113	0.00196	0.00122	0.00169	0.00147	0.00263
501571	Butyricicoccus pullicaecorum	6e-05	5e-05	8e-05	6e-05	0.00014	7e-05	0.00013	8e-05	9e-05	0.00011	7e-05	0.0001	0.00158	0.00733	0.00128	0.00054	0.00076	0.00043	0.00019	5e-05	0.0001	0.00017	0	0.00015	0.00055	0.00022	0	0	0	0.00016	0	0.00035	0.0007	3e-05	0.0001	0.0001	0.0001	4e-05	0.00068	0.00018	0	0.00036	0.00041	0	0.0003	0.00012	0	0
1945634	Butyricicoccus porcorum	2e-05	3e-05	3e-05	8e-05	7e-05	3e-05	8e-05	7e-05	4e-05	5e-05	4e-05	8e-05	0	0	0	0	0	0.00024	0.00016	3e-05	6e-05	0.00013	0	9e-05	7e-05	0	0	0	0	0	0	0	0	2e-05	5e-05	7e-05	8e-05	2e-05	0.00051	6e-05	0	0	0	0	3e-05	0	0	0
154046	Hungatella hathewayi	0.00018	0.00015	0.00027	0.00032	0.00033	0.00077	0.00017	0.00035	0.0009	0.00022	0.00113	0.0002	0.00023	0.00159	7e-05	0.00032	0.00022	0.00054	0.00031	0.00022	0.00019	0.0003	0	0.00024	0.00086	0.00016	0.00241	0.0004	0.00112	0.00033	8e-05	0.00106	0.00028	0.00014	0.00087	0.00097	0.00029	0.0001	0.00362	0.00015	0.00166	0.00025	0.00017	0.00014	0.00019	8e-05	0.00036	0.00045
1946598	Hungatella sp. UBA5385	1e-05	1e-05	1e-05	3e-05	1e-05	1e-05	0	1e-05	0	0	1e-05	0	0	0	0	0	0	0	0	1e-05	1e-05	0	0	1e-05	1e-05	0	0	0	0	0	0	0	0	0	0	1e-05	3e-05	0	1e-05	0	0	0	0	0	0	0	0	0
1946596	Hungatella sp. UBA4396	1e-05	1e-05	1e-05	5e-05	2e-05	1e-05	1e-05	1e-05	1e-05	0	1e-05	0	0	0	0	0	0	0	1e-05	1e-05	1e-05	1e-05	0	1e-05	1e-05	0	0	0	0	0	0	0	0	0	1e-05	1e-05	4e-05	0	1e-05	1e-05	0	0	0	0	0	0	0	0
1946595	Hungatella sp. UBA3402	1e-05	1e-05	1e-05	3e-05	1e-05	1e-05	0	1e-05	1e-05	0	1e-05	0	0	0	0	0	0	0	0	2e-05	1e-05	0	0	2e-05	1e-05	0	0	0	0	0	0	0	0	1e-05	2e-05	1e-05	3e-05	0	1e-05	0	0	0	0	0	0	0	0	0
1946602	Hungatella sp. UBA6642	1e-05	1e-05	0	3e-05	0	0	0	1e-05	0	0	0	0	0	0	0	0	0	0	0	1e-05	0	0	0	0	0	0	0	0	0	0	0	0	0	0	0	0	2e-05	0	0	0	0	0	0	0	0	0	0	0
1946601	Hungatella sp. UBA5982	0	0	0	1e-05	1e-05	0	0	1e-05	0	0	0	0	0	0	0	0	0	0	0	0	1e-05	0	0	1e-05	0	0	0	0	0	0	0	0	0	0	1e-05	0	1e-05	0	1e-05	0	0	0	0	0	0	0	0	0
1946593	Hungatella sp. UBA3048	0	0	0	1e-05	0	0	0	0	0	0	1e-05	0	0	0	0	0	0	0	0	0	1e-05	0	0	1e-05	0	0	0	0	0	0	0	0	0	0	0	0	1e-05	0	1e-05	0	0	0	0	0	0	0	0	0
1946597	Hungatella sp. UBA4568	0	0	0	0	1e-05	0	1e-05	0	0	0	0	0	0	0	0	0	0	0	0	1e-05	0	0	0	0	0	0	0	0	0	0	0	0	0	0	0	0	1e-05	0	1e-05	0	0	0	0	0	0	0	0	0
1946603	Hungatella sp. UBA7603	0	0	0	0	0	0	0	0	0	0	0	0	0	0	0	0	0	0	0	0	0	0	0	0	0	0	0	0	0	0	0	0	0	0	0	0	0	0	0	0	0	0	0	0	0	0	0	0
1946599	Hungatella sp. UBA5640	0	0	0	2e-05	1e-05	0	0	0	0	0	0	0	0	0	0	0	0	0	0	0	0	0	0	0	0	0	0	0	0	0	0	0	0	0	0	0	1e-05	0	0	0	0	0	0	0	0	0	0	0
1870991	Massilioclostridium coli	0.00013	0.00012	6e-05	0.00014	8e-05	0.00011	0.00031	0.00019	0.00025	0.00014	0.00012	0.00013	0	0	0	0	0	0	7e-05	0.00015	0.00021	0.00027	0	0.00013	9e-05	0	0	0	0	0	0	0	0	2e-05	0.00014	7e-05	0.00044	5e-05	0.00024	9e-05	0	0	0	0	0	0	0	0
341220	Lactonifactor longoviformis	2e-05	2e-05	3e-05	5e-05	7e-05	4e-05	2e-05	0.00017	4e-05	5e-05	5e-05	3e-05	0	0	0	2e-05	8e-05	0	2e-05	3e-05	0.00024	4e-05	0	5e-05	0.00017	0.00022	0	0	0.00074	0	0	0	4e-05	9e-05	0.00025	6e-05	5e-05	2e-05	0.00021	2e-05	6e-05	0	7e-05	0	2e-05	0	0	0
1658742	Clostridiaceae bacterium JG1575	0	0	0	4e-05	0	0	0	0	0	0	0	1e-05	0	0	0	0	0	0	0	0	0	0	0	0	0	0	0	0	0	0	0	0	0	0	0	0	6e-05	0	0	0	0	4e-05	0	0	0	0	0	0
1671645	Clostridiaceae bacterium DTU079	0	0	0	1e-05	0	0	0	0	0	0	0	0	0	0	0	0	0	0	0	0	0	0	0	1e-05	0	0	0	0	0	0	0	0	0	0	0	0	1e-05	0	0	0	0	0	0	0	0	0	0	0
1671644	Clostridiaceae bacterium DTU059	0	0	0	0	0	0	0	0	0	0	0	0	0	0	0	0	0	0	0	0	0	0	0	0	0	0	0	0	0	0	0	0	0	0	0	0	0	0	1e-05	1e-05	0	0	0	0	0	0	0	0
1951576	Clostridiaceae bacterium UBA4839	0	0	0	1e-05	0	0	0	0	0	0	0	0	0	0	0	0	0	0	0	0	0	0	0	0	1e-05	0	0	0	0	0	0	0	0	0	0	0	0	0	0	0	0	0	0	0	0	0	0	0
1951583	Clostridiaceae bacterium UBA5444	0	0	0	0	0	0	0	0	0	0	0	0	0	0	0	0	0	0	0	0	0	0	0	0	0	0	0	0	0	0	0	0	0	0	0	0	0	0	0	0	0	0	0	0	0	0	0	0
208226	Alkaliphilus metalliredigens	0	0	0	1e-05	0	0	0	0	0	0	0	0	0	0	0	0	0	0	0	0	0	0	0	0	0	0	0	0	0	0	0	0	0	0	0	0	1e-05	0	0	0	0	0	0	0	0	0	0	0
114628	Alkaliphilus transvaalensis	0	0	0	1e-05	0	0	0	0	0	0	0	0	0	0	0	0	0	0	0	0	0	0	0	0	0	0	0	0	0	0	0	0	0	0	0	0	1e-05	0	0	0	0	0	0	0	0	0	0	0
461876	Alkaliphilus oremlandii	0	0	0	1e-05	0	0	0	0	0	0	0	0	2e-05	0	0	0	7e-05	3e-05	0	0	0	0	0	0	0	3e-05	2e-05	0	5e-05	2e-05	2e-05	4e-05	2e-05	0	0	0	1e-05	0	1e-05	0	0.0001	4e-05	3e-05	6e-05	0	0	0	2e-05
426129	Alkaliphilus peptidifermentans	0	0	0	2e-05	0	0	0	0	0	0	0	0	0	0	0	0	0	0	0	0	0	0	0	0	0	0	0	0	0	0	0	0	0	0	0	0	2e-05	0	0	0	0	0	0	0	0	0	0	0
1872455	Alkaliphilus sp.	0	0	0	0	0	0	0	0	0	0	0	0	0	0	0	0	0	0	0	0	0	0	0	0	0	0	0	0	0	0	0	0	0	0	0	0	0	0	0	0	0	0	0	0	2e-05	0	0	0
1147123	Caloramator quimbayensis	0	0	0	1e-05	0	0	0	0	0	0	0	0	0	0	0	0	0	0	0	0	0	0	0	0	0	0	0	0	0	0	0	0	0	0	0	0	1e-05	0	0	0	0	0	0	0	0	0	0	0
515264	Caloramator australicus	0	0	0	1e-05	0	0	0	0	0	0	0	0	0	0	0	0	0	0	0	0	0	0	0	1e-05	0	0	0	0	0	0	0	0	0	0	0	0	1e-05	0	0	0	0	0	0	0	0	0	0	0
908809	Caloramator mitchellensis	0	0	0	1e-05	0	0	0	0	0	0	0	0	0	0	0	0	0	0	0	0	0	0	0	0	0	0	0	0	0	0	0	0	0	0	0	1e-05	1e-05	0	1e-05	0	0	0	0	0	0	0	0	0
1798184	Sarcina sp. DSM 11001	0	1e-05	1e-05	3e-05	1e-05	1e-05	1e-05	1e-05	1e-05	1e-05	1e-05	1e-05	0	0	0	0	0	0	3e-05	1e-05	1e-05	3e-05	0	2e-05	1e-05	0	0	0	0	0	0	0	0	1e-05	1e-05	1e-05	3e-05	0	1e-05	2e-05	0	0	0	0	0	0	0	0
1585974	Beduini massiliensis	0	0	0	0	0	0	0	0	0	0	0	0	0.0001	6e-05	0.00019	0	7e-05	3e-05	0	0	0	0	0	1e-05	0	0.00019	0.00037	3e-05	5e-05	6e-05	7e-05	2e-05	3e-05	0	0	1e-05	0	0	1e-05	0	0	0.00022	5e-05	3e-05	0.00013	3e-05	6e-05	0.00026
390806	Geosporobacter subterraneus	0	0	0	0	0	0	0	0	0	0	0	0	0	0	0	2e-05	0	0	0	0	0	0	0	0	0	0	0	0	0	0	0	0	2e-05	0	0	0	0	0	0	0	0	0	0	0	0	0	0	0
1424294	Geosporobacter ferrireducens	0	0	0	1e-05	0	0	0	0	0	0	0	0	0	0	0	0	0	0	0	0	0	0	0	0	0	0	0	0	0	0	0	0	0	0	0	0	1e-05	0	0	0	0	0	0	0	2e-05	0	0	2e-05
398199	Proteiniclasticum ruminis	0	0	0	1e-05	0	0	0	0	0	0	0	0	0	2e-05	0	0	0	0	0	0	0	0	0	0	0	0	0	0	0	0	0	0	0	0	0	0	1e-05	0	0	0	7e-05	0	0	0	2e-05	0	0	0
1650662	Desnuesiella massiliensis	0	0	0	1e-05	0	0	0	0	0	0	0	0	2e-05	0	0	0	0	3e-05	0	0	0	0	0	0	0	0	0	0	0	0	0	0	0	0	0	0	1e-05	0	0	0	5e-05	0	0	2e-05	0	0	0	0
655338	Fervidicella metallireducens	0	0	0	1e-05	0	0	0	0	0	0	0	0	0	2e-05	0	0	0	0	1e-05	0	1e-05	1e-05	0	1e-05	1e-05	0	0	0	5e-05	0	0	2e-05	0	0	1e-05	0	1e-05	0	0	0	0	0	0	0	2e-05	0	0	0
288966	Lutispora thermophila	0	0	0	0	0	0	0	0	0	1e-05	0	0	0	0	0	0	0	0	0	0	0	0	0	0	0	0	0	0	0	0	0	0	0	3e-05	0	0	0	0	1e-05	0	0	0	0	0	0	0	0	0
191027	Paramaledivibacter caminithermalis	0	0	0	0	0	0	0	0	0	0	0	0	0	0	0	0	0	0	0	0	0	0	0	0	0	0	0	0	0	0	0	0	0	0	0	0	0	0	0	0	0	0	0	0	0	0	0	0
53422	Thermobrachium celere	0	0	0	1e-05	0	0	0	0	0	0	0	0	0	0	0	0	0	0	0	0	0	0	0	0	0	0	0	0	0	0	0	0	0	0	1e-05	0	1e-05	0	0	0	0	0	0	0	0	0	0	0
1658111	Inediibacterium massiliense	0	0	0	1e-05	0	0	0	0	0	0	0	0	0	0	0	0	0	0	0	0	0	0	0	0	0	0	0	0	0	0	0	0	0	0	0	0	1e-05	0	0	0	0	0	0	0	0	0	0	0
1478221	Anaeromicrobium sediminis	0	0	0	1e-05	0	0	0	0	0	0	0	0	0	0	0	0	0	0	0	0	0	0	0	0	0	0	0	0	0	0	0	0	0	0	0	0	1e-05	0	1e-05	0	0	0	0	0	0	0	0	0
520762	Thermotalea metallivorans	0	0	0	1e-05	0	0	0	0	0	0	0	0	0	0	0	0	0	0	1e-05	0	1e-05	1e-05	0	0	0	0	0	0	0	0	0	0	0	0	0	0	1e-05	0	0	0	0	0	0	0	0	0	0	0
36849	Oxobacter pfennigii	0	0	0	2e-05	1e-05	0	1e-05	0	0	0	0	0	0	0	0	0	0	0	0	0	0	0	0	1e-05	1e-05	3e-05	0	0	0	0	0	0	0	0	0	1e-05	2e-05	0	2e-05	0	0	0	0	0	0.00021	0	0	0
1304284	Caldisalinibacter kiritimatiensis	0	0	0	0	0	0	0	0	0	0	0	0	0	0	0	0	0	0	0	0	0	0	0	0	0	0	0	0	0	0	0	0	0	0	0	0	0	0	0	0	0	0	0	0	5e-05	0	0	0
408753	Clostridiisalibacter paucivorans	0	0	0	0	0	0	0	0	0	0	0	0	0	0	0	0	0	0	0	0	0	0	0	0	0	0	0	0	0	0	0	0	0	0	0	0	0	0	0	0	0	0	0	0	0	0	0	0
36842	Maledivibacter halophilus	0	0	0	1e-05	0	0	0	0	0	0	0	0	0	0	0	0	0	0	0	0	0	0	0	1e-05	0	0	0	0	0	0	0	0	0	0	0	0	1e-05	0	0	0	0	0	0	0	3e-05	0	0	0
166485	Caminicella sporogenes	0	0	0	0	0	0	0	0	0	0	0	0	0	0	2e-05	0	0	0	0	0	0	0	0	0	0	0	0	0	0	0	0	0	0	0	0	0	0	0	1e-05	0	0	0	0	0	0	0	0	0
39488	[Eubacterium] hallii	0.00572	0.0026	0.00102	0.00042	0.00116	0.00138	0.00062	0.0021	0.00153	0.00057	0.00289	0.00061	0.02202	0.04313	0.0078	0.02409	0.00923	0.03298	0.00035	0.009	0.00091	0.00072	0	0.00075	0.0013	0.00732	0.01841	0.10247	0.07556	0.0296	0.05178	0.00838	0.02475	0.00049	0.0017	0.00113	0.00048	0.00078	0.00221	0.00012	0.13777	0.02188	0.01062	0.04116	0.01251	0.0305	0.09194	0.07541
39490	Eubacterium ramulus	0.00557	0.00531	0.0033	0.00264	0.00212	0.0012	0.00189	0.00171	0.00095	0.00111	0.00376	0.00375	0.00043	0.00145	0.00014	0.00119	0.00095	0.0007	0.00048	0.0033	0.00041	0.0036	0	0.00097	0.00332	0.00054	0.0114	3e-05	0	7e-05	0	0.00134	6e-05	0.00162	0.00368	0.00047	0.00135	0.00046	0.00023	0.00047	0	0.00089	0.00044	0.0005	0.00011	0.00028	0.00058	0.00225
39485	[Eubacterium] eligens	0.00359	0.00152	0.00385	0.00445	0.01273	0.00209	0.00022	0.00073	0.00132	0.00064	0.00103	0.00098	0.0002	0.00165	0	6e-05	0.00126	0.00978	0.00099	0.00959	0.0065	0.00048	0.02409	0.00176	0.00271	0.0004	0.02908	0.00017	0.00055	0.00177	0.00038	0.02055	0.00314	0.00771	0.00085	0.00905	0.00495	0.00063	0.00026	0.00032	0.00014	0.00288	0.00049	0.00069	0.00282	0.00271	0.00395	0.0001
165185	uncultured Eubacterium sp.	0.00283	0.00246	0.00104	0.00109	0.00147	0.00178	0.00069	0.00343	0.00135	0.00109	0.00133	0.00082	0	0.00059	2e-05	0.00068	0.00073	0.00022	0.00047	0.00212	0.00062	0.00076	0	0.00071	0.0018	0.00175	0.0008	0.00205	0.0117	0.00196	0.00087	0.00019	0.00071	0.00103	0.00204	0.00097	0.00099	0.00066	0.00039	0.0005	0.00405	8e-05	0.00095	0.00322	0.01561	0.00024	0.00708	0.00364
1262895	Eubacterium sp. CAG:86	0.00013	0.0002	0.00079	0.00335	0.0013	0.00026	3e-05	0.0006	0.00053	0.00018	0.00022	7e-05	0	0	0	0	0	0	0.00019	0.0002	3e-05	4e-05	0	0.00017	4e-05	0	0	0	0	0	0	0	0	0.00027	1e-05	0.00959	0.00144	6e-05	1e-05	5e-05	0	0	0	0	0	0	0	0
1262881	Eubacterium sp. CAG:161	6e-05	3e-05	3e-05	0.00119	0.00011	3e-05	3e-05	2e-05	4e-05	6e-05	3e-05	1e-05	0	0	0	0	0	0	2e-05	7e-05	0.00015	2e-05	0	0.0001	7e-05	0	0	0	0	0	0	0	0	0.00027	3e-05	7e-05	0.00031	2e-05	1e-05	2e-05	0	0	0	0	0	0	0	0
1262884	Eubacterium sp. CAG:202	4e-05	0.0041	8e-05	0.00012	3e-05	0.00016	0.00011	0.00016	3e-05	0.00015	0.00011	4e-05	0	0	0	0	0	0	7e-05	0.01079	0.00014	3e-05	0	0.00022	0.00016	0	0	0	0	2e-05	0	0	0	0	0.02844	0.04155	0.00054	3e-05	0.00043	1e-05	0	0	0	0	0	0	0	2e-05
1262889	Eubacterium sp. CAG:38	3e-05	0.00094	0.00303	0.00044	0.0008	0.00029	4e-05	2e-05	0.0003	0.00011	0.00076	2e-05	0	0	0	0	0	0	3e-05	0.00775	6e-05	1e-05	0	0.00016	0.00014	0	0	0	0	0	0	0	0	1e-05	1e-05	0.00077	0.00091	2e-05	8e-05	3e-05	0	0	0	0	0	0	0	0
1262880	Eubacterium sp. CAG:156	3e-05	1e-05	0.00024	0.00021	2e-05	8e-05	1e-05	0.00063	2e-05	4e-05	0.0001	0	0	0	0	0	0	0	1e-05	4e-05	0.00027	1e-05	0	0.00034	0.0001	0	0	0	0	0	0	0	0	2e-05	0.00023	5e-05	0.00018	1e-05	4e-05	2e-05	0	0	0	0	0	0	0	0
1262885	Eubacterium sp. CAG:248	2e-05	1e-05	0.00028	0.00017	0.0001	0.00023	0.00016	0.00026	8e-05	2e-05	7e-05	4e-05	0	0	0	0	0	0	2e-05	3e-05	3e-05	2e-05	0	0.00022	4e-05	0	0	0	0	0	0	0	0	5e-05	0.00044	8e-05	0.00015	1e-05	0	0.0001	0	0	0	0	0	0	0	0
1262883	Eubacterium sp. CAG:192	1e-05	1e-05	1e-05	0.00012	1e-05	1e-05	1e-05	1e-05	1e-05	1e-05	1e-05	0	0	0	0	0	0	0	0	1e-05	1e-05	1e-05	0	1e-05	4e-05	0	0	0	0	0	0	0	0	0	2e-05	1e-05	0.00011	0	1e-05	0	0	0	1e-05	0	0	0	0	0
1262888	Eubacterium sp. CAG:274	1e-05	0.00017	0	4e-05	1e-05	0	2e-05	0	0	3e-05	0	1e-05	0	0	0	0	0	0	1e-05	0.00461	0	2e-05	0	1e-05	0	0	0	0	0	0	0	0	0	0	0	0.00064	4e-05	0	0	0	0	0	0	0	0	0	0	0
1262890	Eubacterium sp. CAG:581	1e-05	0	2e-05	6e-05	0.00019	3e-05	1e-05	3e-05	0	2e-05	3e-05	1e-05	0	0	0	0	0	0	2e-05	1e-05	4e-05	1e-05	0	2e-05	1e-05	0	0	0	0	0	0	0	0	0	4e-05	1e-05	6e-05	0	3e-05	0	0	0	0	0	0	0	0	0
1262882	Eubacterium sp. CAG:180	1e-05	1e-05	3e-05	6e-05	4e-05	5e-05	0.11567	0.00109	2e-05	0.07165	0.0001	2e-05	0	0	0	0	7e-05	0	3e-05	2e-05	0.13851	2e-05	0	0.00155	2e-05	0.0001	0	0	5e-05	0	0	0	0	0	4e-05	0.03516	0.00019	1e-05	6e-05	7e-05	0	0	0	0.00013	0	0	0	0
1262887	Eubacterium sp. CAG:252	1e-05	3e-05	3e-05	0.00015	4e-05	2e-05	3e-05	3e-05	3e-05	2e-05	2e-05	3e-05	0	0	0	0	0	0	2e-05	4e-05	1e-05	1e-05	0	2e-05	4e-05	0	0	0	0	0	0	0	0	5e-05	2e-05	9e-05	0.00023	2e-05	0	1e-05	0	0	0	0	0	0	0	0
1262893	Eubacterium sp. CAG:786	0	0	1e-05	0.01475	2e-05	1e-05	3e-05	4e-05	1e-05	0	0	1e-05	0	0	0	0	0	0	3e-05	0	1e-05	2e-05	0	8e-05	2e-05	0	0	0	0	0	0	0	0	0	1e-05	3e-05	0.0001	0	2e-05	2e-05	0	0	0	0	0	0	0	0
1262886	Eubacterium sp. CAG:251	1e-05	1e-05	0.00384	0.00019	0.00012	0.00744	0.00275	0.00105	0	0.00028	0.01724	0	0	0	0	0	0	0	0	2e-05	0.00073	0	0	0.00187	0.00023	0	0	0	0	0	0	0	0	0	0.0003	0.00033	0.00041	0	2e-05	0.00093	0	0	0	0	0	0	0	0
1262894	Eubacterium sp. CAG:841	0	0	2e-05	0.00013	6e-05	1e-05	0.0001	2e-05	0	4e-05	1e-05	2e-05	0	0	0	0	0	0	3e-05	0	1e-05	3e-05	0	0.00023	1e-05	0	0	0	0	0	0	0	0	0	3e-05	4e-05	0.00013	0	1e-05	2e-05	0	0	0	0	0	0	0	0
1262878	Eubacterium sp. CAG:115	0	0	0	0.00079	1e-05	0	2e-05	0.00098	1e-05	0	1e-05	4e-05	0	0	0	0	0	0	0.0003	0	0	3e-05	0	7e-05	1e-05	0	0	0	0	0	0	0	2e-05	0	0	6e-05	3e-05	0	1e-05	6e-05	0	0	0	0	0	0	0	0
39496	Eubacterium ventriosum	0.00303	0.0009	0.00167	0.00334	0.00196	0.00104	0.00041	0.00018	0.00139	0.00197	0.00085	0.00021	0.00105	0.00023	0.00014	0.00011	0.00121	3e-05	0.00076	0.00352	0.00099	0.00136	0	0.00077	0.0011	0.00019	0	0.00027	6e-05	0.00066	0.00126	0.00037	0.00035	0.00111	0.00064	0.004	0.00204	0.00021	0.00016	0.00107	6e-05	0.00839	0.00036	0.00476	0.0001	0.00174	0.00215	0.0038
457402	Eubacterium sp. 3_1_31	0.00027	0.00044	1e-05	1e-05	4e-05	3e-05	3e-05	9e-05	0.00019	1e-05	4e-05	0.00014	0	0	0	0	0	0	4e-05	0.00074	0.00016	0.00016	0	0.00015	0.00123	0	0	0	0	0	0	0	0	0.00027	0.00035	4e-05	4e-05	0.0001	0.0001	4e-05	0	0	0	0	0	0	0	0
1946473	Eubacterium sp. UBA3279	0.00011	7e-05	0.00019	7e-05	8e-05	0.00011	3e-05	9e-05	0.00012	8e-05	0.00013	2e-05	0	0	0	0.00017	0	0	2e-05	0.0001	0.00011	2e-05	0	0.0001	7e-05	0	0	0	0	0	0	0	0	2e-05	0.00016	4e-05	6e-05	5e-05	3e-05	2e-05	0	0	0	0	0	0	0	0
53442	Eubacterium callanderi	4e-05	9e-05	4e-05	2e-05	3e-05	2e-05	2e-05	5e-05	1e-05	0.00016	2e-05	0	0	0	0	0	0	0	3e-05	5e-05	0.00017	2e-05	0	0.00012	0.00015	0	0	0	0	0	0	0	0	1e-05	3e-05	3e-05	2e-05	1e-05	9e-05	1e-05	0	0	0	0	0	0	0	0
97253	Eubacterium plexicaudatum	3e-05	3e-05	8e-05	7e-05	5e-05	7e-05	2e-05	4e-05	6e-05	4e-05	7e-05	3e-05	7e-05	5e-05	2e-05	0.00013	9e-05	5e-05	4e-05	4e-05	5e-05	3e-05	0	3e-05	7e-05	2e-05	0.00018	0.00023	0.0004	0.00021	6e-05	0.00012	0.00273	2e-05	3e-05	5e-05	6e-05	2e-05	4e-05	5e-05	0.00019	8e-05	8e-05	5e-05	9e-05	0.00024	0.00014	0.00018
1519438	Eubacterium sp. ER2	3e-05	4e-05	8e-05	6e-05	3e-05	7e-05	3e-05	4e-05	5e-05	8e-05	0.0001	5e-05	0	0	0	0	0	3e-05	2e-05	5e-05	0.00012	7e-05	0	6e-05	5e-05	0	0	0	0	0	0	0	0	1e-05	3e-05	4e-05	6e-05	3e-05	7e-05	3e-05	0	0	0	0	0	0	0	0
155865	Eubacterium pyruvativorans	2e-05	1e-05	1e-05	3e-05	1e-05	1e-05	2e-05	2e-05	7e-05	1e-05	1e-05	2e-05	0	0	0	0	0	0	2e-05	2e-05	3e-05	4e-05	0	3e-05	2e-05	0.00012	0	0	0	0	0	0	0	0	2e-05	1e-05	3e-05	1e-05	2e-05	2e-05	0	0	0	0	0.00038	0	0.00016	0
1965542	Eubacterium sp. An11	2e-05	2e-05	4e-05	6e-05	8e-05	5e-05	3e-05	3e-05	4e-05	4e-05	0.00014	4e-05	0.00012	0.00093	7e-05	3e-05	0	0.0007	3e-05	3e-05	0.00017	5e-05	0	3e-05	0.00021	0	0.00028	0.00069	0.00064	0.00016	4e-05	0.00047	0.00041	2e-05	0.00014	7e-05	5e-05	2e-05	0.00014	2e-05	0.00068	8e-05	0.00028	0.00023	0.00028	0	0.00021	0.00195
29322	[Eubacterium] cellulosolvens	2e-05	2e-05	2e-05	5e-05	3e-05	2e-05	2e-05	3e-05	3e-05	1e-05	3e-05	1e-05	0	0.00011	4e-05	0.00011	0.00018	0	1e-05	3e-05	3e-05	2e-05	0	3e-05	3e-05	5e-05	3e-05	6e-05	0.0003	4e-05	0	7e-05	0.00018	1e-05	2e-05	2e-05	5e-05	1e-05	2e-05	1e-05	0.00031	0.00019	4e-05	8e-05	0	0	0.00012	0.00016
1235790	Eubacterium sp. 14-2	1e-05	2e-05	3e-05	7e-05	5e-05	3e-05	1e-05	3e-05	5e-05	4e-05	3e-05	1e-05	0.00019	0.0004	0.00011	0.00036	0.00143	0.00049	3e-05	2e-05	4e-05	1e-05	0	4e-05	7e-05	0.00039	0.00048	0.00082	0.0014	0.00032	6e-05	0.00016	0.00039	8e-05	5e-05	4e-05	4e-05	3e-05	4e-05	1e-05	0.00099	0.00032	0.00057	0.00032	0.00132	0.00039	0.0007	0.00091
1946479	Eubacterium sp. UBA3782	1e-05	1e-05	1e-05	4e-05	2e-05	1e-05	3e-05	1e-05	1e-05	1e-05	1e-05	1e-05	0	0	0	0	0	0	1e-05	1e-05	2e-05	2e-05	0	2e-05	1e-05	0	0	0	0	0	0	0	0	0	1e-05	2e-05	3e-05	0	2e-05	2e-05	0	0	0	0	0	0	0	0
1732	Eubacterium oxidoreducens	1e-05	1e-05	1e-05	3e-05	2e-05	1e-05	0	1e-05	1e-05	1e-05	1e-05	3e-05	0	4e-05	0	2e-05	0.00217	0	0	1e-05	1e-05	1e-05	0	1e-05	1e-05	0.00025	3e-05	0	5e-05	0	0	0	0.00251	0	1e-05	1e-05	3e-05	1e-05	1e-05	0	0.0001	0	0	3e-05	0.00015	0.00173	0.00112	5e-05
1946480	Eubacterium sp. UBA4238	1e-05	1e-05	1e-05	2e-05	1e-05	1e-05	1e-05	1e-05	1e-05	0	1e-05	0	0	0	0	0	0	0	0	1e-05	1e-05	1e-05	0	1e-05	0	0	0	0	0	0	0	0	0	0	1e-05	1e-05	1e-05	0	1e-05	1e-05	0	0	0	0	0	0	0	0
1946477	Eubacterium sp. UBA3720	1e-05	0	1e-05	4e-05	1e-05	1e-05	1e-05	1e-05	1e-05	0	1e-05	2e-05	0	0	0	0	0	0	1e-05	1e-05	2e-05	1e-05	0	1e-05	1e-05	0	0	0	0	0	0	0	0	0	1e-05	1e-05	4e-05	0	1e-05	1e-05	0	0	0	0	0	0	0	0
2041044	Eubacterium maltosivorans	1e-05	1e-05	1e-05	2e-05	2e-05	1e-05	2e-05	4e-05	2e-05	1e-05	2e-05	0.0001	0	0	0	0	0	9e-05	1e-05	2e-05	2e-05	0.00014	0	9e-05	8e-05	0	0	0	0	0	0	0	0	0.00016	5e-05	1e-05	2e-05	1e-05	4e-05	1e-05	0	0	0	0	0	0	0	0
42322	Eubacterium ruminantium	0	0	0	3e-05	1e-05	0	0	0	0	0	0	0	0	0	8e-05	9e-05	0.00011	0	0	0	0	0	0	0	0	3e-05	5e-05	6e-05	0.0001	2e-05	2e-05	2e-05	5e-05	0	0	1e-05	3e-05	0	1e-05	0	5e-05	0	1e-05	3e-05	0	0	2e-05	6e-05
39495	Eubacterium uniforme	1e-05	2e-05	2e-05	7e-05	2e-05	1e-05	2e-05	1e-05	1e-05	1e-05	1e-05	1e-05	0	0	0	0	0	0	0	1e-05	1e-05	0	0	1e-05	1e-05	0	0	0	0	0	0	0	0	0	0	1e-05	7e-05	0	0	0	0	0	0	0	0	0	0	0
1261640	Eubacterium sp. 68-3-10	0	1e-05	1e-05	2e-05	1e-05	1e-05	2e-05	2e-05	1e-05	1e-05	1e-05	2e-05	0	0	0	0	0	0	1e-05	1e-05	2e-05	2e-05	0	2e-05	1e-05	0	0	0	0	0	0	0	0	1e-05	1e-05	3e-05	2e-05	1e-05	4e-05	1e-05	0	0	0	0	0	0	0	0
290054	Eubacterium coprostanoligenes	0	1e-05	9e-05	5e-05	5e-05	0.00013	0.00015	0.00032	1e-05	6e-05	0.00028	1e-05	2e-05	0.01565	6e-05	0	0.01166	0.00419	1e-05	1e-05	7e-05	1e-05	0	0.00042	7e-05	0	0	3e-05	5e-05	0.02133	0.00011	0.00805	5e-05	0	9e-05	0.00024	0.00037	0	3e-05	6e-05	0	0.00461	0.00082	0.0088	7e-05	0.00182	0.09735	0.0442
39497	Eubacterium xylanophilum	0	0	3e-05	3e-05	1e-05	1e-05	0	0	1e-05	0	1e-05	0	0	2e-05	0	2e-05	4e-05	0.00251	1e-05	0	0	0	0	1e-05	0	0.00023	0	0.00015	0	0.0027	0.00014	0.00427	0.00069	0	0	0	3e-05	1e-05	1e-05	0	5e-05	0.00055	0.00053	0.00031	0.00016	0.00017	8e-05	2e-05
1946482	Eubacterium sp. UBA4343	0	1e-05	1e-05	0.00018	2e-05	1e-05	3e-05	2e-05	2e-05	1e-05	1e-05	2e-05	0	0	0	0	0	0	2e-05	1e-05	2e-05	1e-05	0	3e-05	1e-05	0	0	0	0	0	0	0	0	0	1e-05	1e-05	9e-05	1e-05	1e-05	2e-05	0	0	0	0	0	0	0	0
1946483	Eubacterium sp. UBA5416	0	0	0	1e-05	1e-05	1e-05	1e-05	1e-05	1e-05	0	0	0	0	0	0	0	0	0	1e-05	0	1e-05	0	0	0	1e-05	0	0	0	0	0	0	0	0	0	0	0	1e-05	0	0	0	0	0	0	0	0	0	0	0
1946486	Eubacterium sp. UBA7775	0	1e-05	1e-05	2e-05	1e-05	1e-05	1e-05	1e-05	1e-05	0	1e-05	0	0	0	0	0	0	0	0	1e-05	1e-05	1e-05	0	1e-05	1e-05	0	0	0	0	0	0	0	0	0	1e-05	1e-05	2e-05	0	1e-05	1e-05	0	0	0	0	0	0	0	0
1658112	Eubacterium sp. SB2	0	0	4e-05	2e-05	1e-05	0.00017	0	0.00014	5e-05	4e-05	3e-05	2e-05	0	0	0	0	0	0	1e-05	0	2e-05	1e-05	0	1e-05	1e-05	0	0	0	0	0	0	0	0	0	0.00029	5e-05	1e-05	0	0.00037	0	0	0	0	0	0	0	0	0
81409	Eubacterium aggregans	0	0	1e-05	1e-05	1e-05	1e-05	1e-05	0	1e-05	0	1e-05	1e-05	0	0	0	0	0	0	0	0	0	1e-05	0	0	1e-05	0	0	0	0	0	0	0	0	0	0	1e-05	1e-05	0	0	1e-05	0	0	0	0	0	0	0	0
1392487	Eubacterium sp. AB3007	0	0	1e-05	2e-05	1e-05	0	2e-05	1e-05	1e-05	0	0	0	0	0	0	0	0	0	0	0	1e-05	1e-05	0	1e-05	0	0	0	0	0	2e-05	0	0	0	0	1e-05	1e-05	2e-05	0	2e-05	1e-05	0	0	0	0	0	0	0	0
1528	Eubacterium barkeri	0	0	0	0	0	0	1e-05	0	0	0	1e-05	1e-05	0	0	0	0	0	0	2e-05	0	1e-05	1e-05	0	1e-05	0	0	0	0	0	0	0	0	0	0	1e-05	0	0	0	1e-05	0	0	0	0	0	0	4e-05	0	0
1736	Eubacterium limosum	0	0	0	1e-05	1e-05	0	2e-05	0	1e-05	1e-05	1e-05	1e-05	0	0	0	0	0	0	0	0	2e-05	1e-05	0	1e-05	1e-05	0	0	0	0	0	0	0	0	0	1e-05	1e-05	1e-05	0	1e-05	1e-05	0	0	0	0	0	0	0	0
1780380	Eubacteriaceae bacterium CHKCI004	3e-05	5e-05	3e-05	5e-05	6e-05	3e-05	3e-05	4e-05	6e-05	4e-05	3e-05	3e-05	0.00047	0.00252	0.00026	0.00057	8e-05	0.00147	4e-05	6e-05	0.00014	4e-05	0	4e-05	0.00033	0.00102	0.00051	0.00684	0.00145	0.00099	0.00012	0.00037	0.00072	6e-05	6e-05	9e-05	4e-05	3e-05	0.00012	2e-05	0.00519	0.00101	0.00034	0.00032	0.00119	0.00078	0.00181	0.01084
1951765	Eubacteriaceae bacterium UBA4266	0	0	0	0	0	0	1e-05	0	1e-05	0	0	0	0	0	0	0	0	0	0	0	0	0	0	0	0	0	0	0	0	0	0	0	0	0	0	0	1e-05	1e-05	0	1e-05	0	0	0	0	0	0	0	0
1951762	Eubacteriaceae bacterium UBA1048	0	0	0	0	0	0	0	0	0	0	0	0	0	0	0	0	0	0	0	0	0	0	0	0	0	0	0	0	0	0	0	0	0	0	0	0	0	0	1e-05	0	0	0	0	0	0	0	0	0
1951767	Eubacteriaceae bacterium UBA7485	0	0	2e-05	0	0	2e-05	0	0	0	0	1e-05	0	0	0	0	0	0	0	1e-05	0	0	1e-05	0	0	3e-05	0	0	0	0	0	0	0	0	0	0	0	0	0	0	0	0	0	0	0	0	0	0	0
1871029	Intestinibacillus massiliensis	2e-05	1e-05	2e-05	5e-05	5e-05	1e-05	6e-05	3e-05	2e-05	1e-05	2e-05	2e-05	2e-05	0	0	0	0	0	2e-05	2e-05	2e-05	6e-05	0	5e-05	7e-05	0	0	3e-05	0	0	0	0	0	0.0001	2e-05	4e-05	5e-05	1e-05	7e-05	0.0001	0	0	0	0	0	0	0	0
52689	Acetobacterium bakii	0	0	0	1e-05	0	0	0	0	0	0	0	0	0	0	0	0	0	0	0	0	0	0	0	0	0	0	0	0	0	0	0	0	0	0	0	0	1e-05	0	0	0	0	0	0	0	0	0	0	0
52694	Acetobacterium wieringae	0	0	0	0	1e-05	1e-05	1e-05	0	0	0	0	1e-05	0	0	0	0	0	0	0	0	0	0	0	0	0	0	0	0	0	0	0	0	0	0	0	0	0	0	0	0	0	0	0	0	0	0	0	0
1945908	Acetobacterium sp. UBA6819	0	0	0	0	0	0	0	0	0	0	0	0	0	0	0	0	0	0	0	0	0	0	0	0	0	0	0	0	0	0	0	0	0	0	0	0	0	0	0	0	0	0	0	0	0	0	0	0
235931	Alkalibacter saccharofermentans	0	0	0	0	0	0	0	0	0	0	0	0	0	0	0	0	0	0	0	1e-05	0	0	0	0	0	0	0	0	0	0	0	0	0	0	0	0	0	0	0	0	0	0	0	0	0	0	2e-05	0
113287	Pseudoramibacter alactolyticus	0	0	0	1e-05	1e-05	0	1e-05	1e-05	1e-05	0	0	0	2e-05	0.00013	6e-05	2e-05	0	8e-05	2e-05	0	1e-05	2e-05	0	1e-05	1e-05	3e-05	0.00013	9e-05	0	4e-05	0.00027	0.00013	0.00012	0	1e-05	1e-05	2e-05	0	2e-05	1e-05	0.0001	0.00026	9e-05	0.00019	7e-05	7e-05	8e-05	0.00013
214853	Anaerofustis stercorihominis	0	1e-05	1e-05	0	1e-05	0	0	1e-05	1e-05	1e-05	1e-05	1e-05	0	0	0	0	0	0	0	1e-05	0	0	0	1e-05	0	0	5e-05	0	0.00024	0	0	0	0	0	1e-05	1e-05	0	0	5e-05	0	0	0	3e-05	0	0	0	0	0
1897011	Oscillibacter sp. 57_20	0.00052	0.00228	0.00407	0.00141	0.0034	0.00089	0.00325	0.0004	0.0052	0.00193	0.00037	0.00142	0	0	0	0	0	0	0.00069	0.00088	0.00073	0.00151	0.02132	0.0009	0.00106	4e-05	0	0	0	0	0	0	0	1e-05	0.00033	0.00807	0.00158	0.00042	0.00014	0.00123	0	0	0	0	0	0	0	0
876091	uncultured Oscillibacter sp.	0.00035	0.00149	0.00179	0.00199	0.00483	0.00112	0.00299	0.01857	0.00663	0.00162	0.00076	0.00764	6e-05	0	3e-05	0	0.00022	0.00032	0.007	0.00172	0.00218	0.00307	0	0.00119	0.00056	0.00093	0	0.00044	0	0	0.00013	0.0001	0.00016	0.00841	0.0029	0.00135	0.00185	0.002	0.03282	0.00213	0	0.00018	0.00051	0.00011	0.03062	0.00017	0.00111	0
1262910	Oscillibacter sp. CAG:155	8e-05	9e-05	0.00011	0.00031	0.00035	4e-05	0.00044	0.00018	6e-05	0.0002	3e-05	0.00053	0	0	0	0	0	0	8e-05	5e-05	0.00014	0.00032	0	0.0001	7e-05	0	0	0	0	0	0	0	0	2e-05	0.0001	0.0002	0.00039	2e-05	0.00034	0.00023	0	0	0	0	0	0	0	0
1262911	Oscillibacter sp. CAG:241	2e-05	0.00018	0.00374	0.00173	0.00266	0.0014	0.01424	0.00179	0.00015	0.00141	0.00058	0.01403	0	0	0	0	0	0	0.00021	0.00011	0.00012	0.01044	0	0.00332	0.00022	0	0	0	0	0	0	0	0	1e-05	0.0006	0.0153	0.00208	5e-05	0.00013	0.07025	0	0	0.0001	0	0	0	0	0
1519439	Oscillibacter sp. ER4	0.00015	0.00176	0.01001	0.00553	0.01566	0.00415	0.01978	0.00047	0.00066	0.01357	0.00464	0.01903	0	0	0.0007	8e-05	0.0002	0.00238	0.00211	0.00107	0.00496	0.02854	0	0.01255	0.00665	0.00456	0	0.00023	0	0.00084	9e-05	0.00331	0.00334	7e-05	0.00144	0.01469	0.0053	0.00029	0.00017	0.0455	0.00074	0.00067	0.00089	0.00314	0.01714	0.0008	0.00253	9e-05
1855299	Oscillibacter sp. PC13	5e-05	0.0001	0.00023	0.00034	0.00031	0.00011	0.00041	0.00014	0.00015	0.00021	0.00013	0.00016	0	0	0	0	0	4e-05	9e-05	6e-05	8e-05	0.00023	0	0.00015	0.0001	0	0	3e-05	0	0	0	0	0	1e-05	0.00014	0.00026	0.00035	2e-05	0.00014	0.00017	0	4e-05	4e-05	5e-05	0.00015	0	0	0.00016
1897012	Oscillibacter sp. CAG:241_62_21	4e-05	0.00018	0.00036	0.00382	0.00722	0.00012	0.00303	0.00107	0.0001	0.00365	0.00011	0.00084	0	0	0	0	0	0	0.00017	0.00012	0.0001	0.00092	0	0.00057	0.00026	0	0	0	0	0	0	0	0	1e-05	0.00044	0.00114	0.00611	2e-05	0.00014	0.00376	0	0	0	4e-05	0	0	0	0
1235797	Oscillibacter sp. 1-3	2e-05	5e-05	0.00016	0.00032	0.00018	6e-05	0.00049	0.00023	9e-05	0.00012	6e-05	0.00011	0	0	0	0	0	0	5e-05	3e-05	9e-05	0.00019	0	0.0001	0.00011	0	0	0	0	0	0	0	0	2e-05	0.00014	0.00017	0.00032	2e-05	0.00032	0.00019	0	0	0	0	0	0	0	0
1263547	Oscillibacter ruminantium	1e-05	3e-05	5e-05	0.0002	0.00012	2e-05	0.00027	9e-05	3e-05	3e-05	2e-05	6e-05	0	0	0	0	0	0	6e-05	2e-05	4e-05	0.0001	0	4e-05	3e-05	0	0	0	0	0	0	0	0	1e-05	6e-05	0.0001	0.0002	1e-05	0.00011	0.00013	0	0	0	0	0	0	0	0
351091	Oscillibacter valericigenes	1e-05	3e-05	6e-05	0.00019	0.00011	3e-05	0.00024	9e-05	4e-05	4e-05	3e-05	6e-05	0	0	0	0	0	0	6e-05	2e-05	4e-05	0.0001	0	5e-05	3e-05	0	0	0	0	0	0	0	0	1e-05	6e-05	0.0001	0.00017	1e-05	8e-05	0.00012	0	0	0	0	0	0	0	0
1947021	Oscillibacter sp. UBA6647	1e-05	2e-05	4e-05	0.00012	7e-05	1e-05	0.00021	0.0001	3e-05	2e-05	1e-05	4e-05	0	0	0	0	0	0	2e-05	1e-05	2e-05	7e-05	0	3e-05	2e-05	0	0	0	0	0	0	0	0	1e-05	5e-05	5e-05	0.00011	1e-05	8e-05	8e-05	0	0	0	0	0	0	0	0
1952969	Oscillospiraceae bacterium UBA4632	1e-05	0.00075	0.00036	0.0005	0.00137	0.00013	0.00084	8e-05	4e-05	0.00033	0.00015	0.00055	0	0	0	0	0	0	7e-05	0.00044	0.00013	0.00088	0	0.00037	0.00018	0	0	0	0	0	0	0	0	1e-05	9e-05	0.00046	0.00057	2e-05	0.00013	0.00157	0	0	0	0	0	0	0	0
1930019	Oscillospiraceae bacterium Zagget6	1e-05	1e-05	3e-05	0.00012	4e-05	2e-05	0.00018	4e-05	1e-05	2e-05	2e-05	3e-05	0	0	0	0	0	0	4e-05	1e-05	3e-05	7e-05	0	3e-05	3e-05	0	0	0	0	0	0	0	0	1e-05	3e-05	4e-05	0.00013	1e-05	6e-05	0.0001	0	0	0	0	0	0	0	0
1952966	Oscillospiraceae bacterium UBA1230	0	1e-05	3e-05	0.00025	0.0001	1e-05	0.00047	0.00012	1e-05	1e-05	1e-05	4e-05	0	0	0	0	0	0	4e-05	1e-05	1e-05	0.0001	0	1e-05	1e-05	0	0	0	0	0	0	0	0	0	0.0001	5e-05	0.00023	0	3e-05	7e-05	0	0	0	0	0	0	0	0
1952970	Oscillospiraceae bacterium UBA6359	0	2e-05	0.00018	0.0016	0.00095	2e-05	0.00254	0.0005	1e-05	4e-05	6e-05	0.00022	0	0	0	0	0	0	1e-05	1e-05	1e-05	0.00086	0	2e-05	3e-05	0	0	0	0	0	0	0	0	0	0.00042	0.00014	0.00233	0	3e-05	0.0005	0	0	0	0	0	0	0	0
1952972	Oscillospiraceae bacterium UBA6409	0	1e-05	0.00016	0.00161	0.00101	2e-05	0.00275	0.00024	1e-05	1e-05	6e-05	0.00019	0	0	0	0	0	0	1e-05	1e-05	1e-05	0.00083	0	2e-05	1e-05	0	0	0	0	0	0	0	0	0	0.0004	8e-05	0.00235	0	4e-05	0.0005	0	0	0	0	0	0	0	0
1952971	Oscillospiraceae bacterium UBA6370	1e-05	7e-05	0.00016	0.00079	0.00035	5e-05	0.00045	2e-05	2e-05	6e-05	0.00011	8e-05	0	0	0	0	0	0	1e-05	5e-05	1e-05	0.00029	0	9e-05	2e-05	0	0	0	0	0	0	0	0	0	5e-05	0.0002	0.00129	0	4e-05	0.00048	0	0	0	0	0	0	0	0
1952974	Oscillospiraceae bacterium UBA790	1e-05	5e-05	0.00023	0.00123	0.00044	7e-05	0.00057	6e-05	1e-05	9e-05	0.00014	8e-05	0	0	0	0	0	0	1e-05	5e-05	7e-05	0.00029	0	0.00016	6e-05	0	0	0	0	0	0	0	0	0	2e-05	0.00053	0.00181	0	2e-05	0.00079	0	0	0	0	0	0	0	0
1952967	Oscillospiraceae bacterium UBA3295	0	1e-05	3e-05	0.00031	0.00013	1e-05	0.00056	0.00011	1e-05	1e-05	2e-05	2e-05	0	0	0	0	0	0	1e-05	0	1e-05	0.0001	0	1e-05	5e-05	0	0	0	0	0	0	0	0	0	0.00011	4e-05	0.0003	0	8e-05	6e-05	0	0	0	0	0	0	0	0
1930020	Oscillospiraceae bacterium Zagget12	0	0	0	1e-05	1e-05	0	3e-05	1e-05	0	1e-05	0	0	0	2e-05	2e-05	2e-05	4e-05	3e-05	0	0	2e-05	0	0	2e-05	0	0	0	0	0	0.00022	0	2e-05	3e-05	0	0	2e-05	2e-05	0	1e-05	1e-05	0	0	0	0.0001	3e-05	3e-05	0.00043	0.00014
1715004	Clostridiales bacterium KLE1615	0.00024	0.0002	0.00029	0.00024	0.00043	0.00039	0.00016	0.00017	0.0002	0.00036	0.0004	0.00018	0	0	0	0	0	0	6e-05	0.00066	0.00028	0.00015	0	0.00022	0.00053	0	0	0	0	0	0	0	0	0.00018	0.00017	0.00022	0.00019	8e-05	4e-05	0.0001	0	0	0	0	0	0	0	0
1232453	Clostridiales bacterium VE202-21	0.00017	0.00021	0.00018	0.00067	0.00043	0.00014	0.00058	0.00058	0.00099	0.00096	0.00019	0.0002	0	0	0	0	0	0.0001	0.00035	0.00021	0.00034	0.00037	0	0.00066	0.00083	0	0	0	0	0.00035	0	0	0	9e-05	0.00023	0.00072	0.00073	0.0001	0.00056	0.00013	0	0	0	0	0	0	6e-05	0
1780379	Clostridiales bacterium CHKCI006	6e-05	8e-05	4e-05	5e-05	4e-05	5e-05	4e-05	5e-05	3e-05	0.00013	0.0001	2e-05	2e-05	0	0	0	0	0	1e-05	9e-05	0.00024	5e-05	0	0.00016	0.00022	0	0	0	0	0	8e-05	0	2e-05	5e-05	0.00015	6e-05	4e-05	1e-05	0.00026	2e-05	0	0	1e-05	0	0	0	0	0
1674841	Clostridiales bacterium Firm_03	5e-05	9e-05	1e-05	4e-05	4e-05	2e-05	3e-05	3e-05	4e-05	2e-05	2e-05	4e-05	0	0	0	0	0	0	1e-05	8e-05	0.00012	2e-05	0	4e-05	2e-05	0	0	0	0	0	0	0	0	1e-05	2e-05	3e-05	4e-05	1e-05	5e-05	1e-05	0	0	0	0	0	0	0	0
457421	Clostridiales bacterium 1_7_47FAA	3e-05	2e-05	1e-05	7e-05	0.00034	5e-05	1e-05	4e-05	3e-05	5e-05	1e-05	0.00012	9e-05	7e-05	9e-05	0.00016	0.00012	0	1e-05	3e-05	0.00019	0.00014	0	3e-05	6e-05	0.00057	0.0001	0.00017	9e-05	0	3e-05	6e-05	0	6e-05	0.00047	0.00021	7e-05	1e-05	0.00022	1e-05	0	0	4e-05	2e-05	2e-05	4e-05	5e-05	0.0001
1950922	Clostridiales bacterium UBA7044	3e-05	3e-05	3e-05	0.00089	7e-05	3e-05	0.0001	5e-05	4e-05	2e-05	4e-05	3e-05	0	0	0	0	0	0	6e-05	1e-05	6e-05	7e-05	0	3e-05	0.00015	0	0	0	0	0	0	0	0	0	3e-05	0.00011	0.00087	1e-05	0.00024	8e-05	0	0	0	0	0	0	0	0
1950876	Clostridiales bacterium UBA4224	2e-05	2e-05	1e-05	0.00012	3e-05	1e-05	0.00012	2e-05	2e-05	1e-05	2e-05	2e-05	0	0	0	0	0	0	4e-05	2e-05	2e-05	4e-05	0	3e-05	2e-05	0	0	0	0	0	0	0	0	0	2e-05	2e-05	0.00014	1e-05	1e-05	3e-05	0	0	0	0	0	0	0	0
1232452	Clostridiales bacterium VE202-14	6e-05	6e-05	7e-05	8e-05	0.00016	8e-05	8e-05	0.00121	0.00103	0.00014	0.00012	0.00014	0.00021	0.00027	0	0	0	0	0.00047	8e-05	0.00014	0.00025	0	7e-05	0.00053	0	0	0	0	0	0	0	0	0.00013	0.00032	0.0001	8e-05	0.00014	0.00555	4e-05	0	0	0	0	0	0	0	0
877414	Clostridiales bacterium NK3B98	2e-05	2e-05	3e-05	0.00016	7e-05	2e-05	0.00015	7e-05	3e-05	2e-05	2e-05	4e-05	0	0	0	0	0	0	7e-05	2e-05	6e-05	8e-05	0	5e-05	5e-05	0	0	0	0	0	0	0	0.00026	1e-05	4e-05	8e-05	0.00015	1e-05	7e-05	0.0001	0	0	0	0	0	0.00018	0	0
1950924	Clostridiales bacterium UBA7103	2e-05	3e-05	5e-05	0.00038	0.00014	2e-05	0.00026	5e-05	2e-05	2e-05	2e-05	2e-05	0	0	0	0	0	0	3e-05	2e-05	2e-05	6e-05	0	2e-05	2e-05	0	0	0	0	0	0	0	0	0	3e-05	0.00016	0.00032	1e-05	0.00014	8e-05	0	0	0	0	0	0	0	0
1232438	Clostridiales bacterium VE202-01	2e-05	5e-05	2e-05	4e-05	0.00011	1e-05	5e-05	0.00015	0.00013	3e-05	2e-05	1e-05	0	0.00015	0	0	0	0	0	0.00012	0.00032	4e-05	0	3e-05	2e-05	0	0	0	0	0	0	0	0	0	2e-05	0.00011	1e-05	2e-05	1e-05	1e-05	0	0	5e-05	0	0	0	0	0
1780378	Clostridiales bacterium CHKCI001	2e-05	2e-05	1e-05	5e-05	2e-05	3e-05	1e-05	1e-05	2e-05	1e-05	2e-05	5e-05	4e-05	8e-05	4e-05	0.00018	0.00032	8e-05	1e-05	2e-05	2e-05	1e-05	0	1e-05	2e-05	0.00015	0.0002	0.00012	0.00067	4e-05	7e-05	4e-05	0.00017	2e-05	2e-05	1e-05	4e-05	1e-05	2e-05	1e-05	0.00052	0.00011	0.00011	6e-05	2e-05	3e-05	6e-05	0.0008
1232447	Clostridiales bacterium VE202-09	2e-05	1e-05	2e-05	3e-05	1e-05	2e-05	2e-05	1e-05	4e-05	2e-05	2e-05	2e-05	0	0.00017	2e-05	0.00014	0	3e-05	2e-05	2e-05	4e-05	2e-05	0	3e-05	0.00021	0	0	0	0.00012	2e-05	3e-05	0	0.0001	0.00074	3e-05	3e-05	4e-05	2e-05	5e-05	1e-05	7e-05	0	0	0	4e-05	8e-05	5e-05	0.00011
1950825	Clostridiales bacterium UBA1701	1e-05	2e-05	5e-05	0.00027	0.0001	7e-05	0.00018	0.00026	2e-05	4e-05	5e-05	2e-05	0	0	0	0	0	0	3e-05	2e-05	2e-05	7e-05	0	9e-05	6e-05	0	0	0	0	0	0	0	0	2e-05	4e-05	0.00013	0.00027	1e-05	0.00034	7e-05	0	0	0	0	0	0	0	0
1950869	Clostridiales bacterium UBA3805	1e-05	3e-05	3e-05	0.00027	0.0001	1e-05	0.00021	5e-05	5e-05	5e-05	2e-05	4e-05	0	0	0	0	0	0	6e-05	2e-05	3e-05	0.00011	0	4e-05	6e-05	0	0	0	0	0	0	0	0	1e-05	5e-05	0.00012	0.00025	2e-05	0.00023	0.00012	0	0	0	0	0	0	0	0
1950886	Clostridiales bacterium UBA4696	1e-05	5e-05	0.00036	0.00352	0.00203	0.00012	0.00416	9e-05	6e-05	0.00011	0.00021	0.00081	0	0	0	0	0	0	0.0001	4e-05	6e-05	0.00241	0	0.00012	8e-05	0	0	0	0	0	0	0	0	1e-05	7e-05	0.02372	0.00215	3e-05	0.00018	0.00372	0	0	0	0	0	0	0	0
1950872	Clostridiales bacterium UBA3953	3e-05	2e-05	3e-05	9e-05	4e-05	5e-05	4e-05	1e-05	2e-05	1e-05	4e-05	0.00023	0	0	0	0	0	0	2e-05	3e-05	3e-05	3e-05	0	2e-05	9e-05	0	0	0	0	0	0	0	0	2e-05	2e-05	4e-05	9e-05	2e-05	8e-05	3e-05	0	0	0	0	0	0	0	0
1950930	Clostridiales bacterium UBA735	1e-05	4e-05	0.00028	0.00092	0.00073	0.00014	0.00181	7e-05	8e-05	0.00042	0.00013	0.00016	0	0	0	0	0	0	9e-05	2e-05	5e-05	0.00026	0	0.00023	6e-05	0	0	0	0	0	0	0	0	0	0.00021	0.00109	0.00098	2e-05	0.00014	0.00079	0	0	0	0	0	0	0	0
1232444	Clostridiales bacterium VE202-15	1e-05	1e-05	1e-05	5e-05	8e-05	1e-05	3e-05	1e-05	1e-05	1e-05	1e-05	1e-05	0.00019	5e-05	0.0002	3e-05	4e-05	0	1e-05	1e-05	3e-05	3e-05	0	2e-05	2e-05	5e-05	0.00018	0	0	2e-05	3e-05	5e-05	0.00013	2e-05	3e-05	0.0001	5e-05	0	0.00023	2e-05	6e-05	8e-05	1e-05	2e-05	0	0	0	3e-05
1950912	Clostridiales bacterium UBA6386	1e-05	2e-05	8e-05	0.00285	0.00022	4e-05	0.00037	8e-05	5e-05	5e-05	5e-05	9e-05	0	0	0	0	0	0	0.00021	2e-05	9e-05	0.0002	0	9e-05	6e-05	0	0	0	0	0	0	0	0	1e-05	5e-05	0.00042	0.00229	1e-05	9e-05	0.00022	0	0	0	0	0	0	0	0
1950822	Clostridiales bacterium UBA1390	1e-05	1e-05	2e-05	2e-05	0.00013	2e-05	3e-05	1e-05	1e-05	6e-05	2e-05	1e-05	0	0	0	0	0	0	1e-05	1e-05	2e-05	1e-05	0	3e-05	3e-05	0	0	0	0	0	0	0	0	1e-05	2e-05	2e-05	2e-05	0	5e-05	9e-05	0	0	0	0	0	0	0	0
1950883	Clostridiales bacterium UBA4644	2e-05	7e-05	0.00033	0.00058	0.00116	0.00012	0.00119	0.00014	7e-05	7e-05	0.0001	0.00031	0	0	0	0	0	0	0.00012	5e-05	5e-05	0.0005	0	0.00013	0.00031	0	0	0	0	0	0	0	0	0	0.0001	0.00078	0.00105	1e-05	6e-05	0.00175	0	0	0	0	0	0	0	0
1232460	Clostridiales bacterium VE202-28	1e-05	1e-05	3e-05	2e-05	0.00018	7e-05	3e-05	0.00018	2e-05	2e-05	3e-05	5e-05	0	0	0	0	0	0	3e-05	2e-05	5e-05	5e-05	0	4e-05	7e-05	0	0	0	0	0	0	0	0	2e-05	7e-05	0.0001	2e-05	1e-05	0.00045	6e-05	0	0	0	0	0	0	0	0
1950853	Clostridiales bacterium UBA3259	1e-05	1e-05	3e-05	0.0005	0.00011	2e-05	0.00015	4e-05	2e-05	5e-05	2e-05	3e-05	0	0	0	0	0	0	7e-05	1e-05	6e-05	8e-05	0	6e-05	5e-05	0	0	0	0	0	0	0	0	2e-05	4e-05	0.00014	0.00052	1e-05	4e-05	0.00011	0	0	0	2e-05	0	0	0	0
1898207	Clostridiales bacterium	1e-05	1e-05	3e-05	0.0001	5e-05	3e-05	0.00011	2e-05	2e-05	4e-05	3e-05	5e-05	0	0	0	0	0	0	9e-05	1e-05	4e-05	0.00014	0	6e-05	7e-05	0	0	0	0	0	0	0	0	1e-05	4e-05	0.00015	9e-05	1e-05	6e-05	0.00013	0	0	0	0	0	0	0	0
1950935	Clostridiales bacterium UBA7739	1e-05	0.00115	0.00302	0.00032	0.00042	0.00181	0.00292	0.00437	0.03158	0.0007	0.00075	0.00107	0	0	0	0	0	0	0.00702	0.00066	2e-05	0.00475	0	0.00068	0.00891	0	0	0	0	0	0	0	0	0	5e-05	0.00061	0.00024	0.00751	0.00027	0.00599	0	0	0	0	0	0	0	0
1950913	Clostridiales bacterium UBA6388	1e-05	4e-05	0.00023	0.0007	0.00141	0.00011	0.00224	6e-05	4e-05	8e-05	0.00014	0.00014	0	0	0	0	0	0	5e-05	2e-05	2e-05	0.00028	0	0.00015	4e-05	0	0	0	0	0	0	0	0	1e-05	4e-05	0.00188	0.0009	1e-05	9e-05	0.0006	0	0	0	0	0	0	0	0
1950916	Clostridiales bacterium UBA6468	1e-05	2e-05	5e-05	0.00323	0.0002	3e-05	0.00034	6e-05	4e-05	6e-05	3e-05	9e-05	0	0	0	0	0	0	0.00015	2e-05	7e-05	0.00018	0	0.00011	6e-05	0	0	0	0	0	0	0	0	1e-05	4e-05	0.00039	0.00264	1e-05	8e-05	0.00018	0	0	0	0	0	0	0	0
1950910	Clostridiales bacterium UBA6330	0	0	1e-05	5e-05	2e-05	1e-05	4e-05	1e-05	1e-05	1e-05	1e-05	0	0	0	0	0	0	0	1e-05	0	1e-05	3e-05	0	1e-05	1e-05	0	0	0	0	0	0	0	0	0	1e-05	2e-05	5e-05	0	3e-05	3e-05	0	0	0	0	0	0	0	0
1950827	Clostridiales bacterium UBA1728	0	1e-05	2e-05	0.00016	6e-05	1e-05	0.00013	4e-05	2e-05	1e-05	1e-05	2e-05	0	0	0	0	0	0	2e-05	1e-05	2e-05	5e-05	0	2e-05	2e-05	0	0	0	0	0	0	0	0	0	2e-05	4e-05	0.00017	1e-05	0.00015	9e-05	0	0	0	0	0	0	0	0
1497955	Clostridiales bacterium KA00274	0	0	1e-05	1e-05	0	0	0	0	1e-05	0	0	0	0	2e-05	0	0	0	0	0	0	2e-05	1e-05	0	1e-05	0	0	3e-05	0	0	0	0	0	0	0	2e-05	0	1e-05	0	0	0	0	4e-05	0	0	2e-05	0	0	0
1950904	Clostridiales bacterium UBA5888	1e-05	1e-05	4e-05	0.00026	0.00013	2e-05	0.00014	2e-05	1e-05	1e-05	2e-05	2e-05	0	0	0	0	0	0	0	1e-05	1e-05	5e-05	0	2e-05	4e-05	0	0	0	0	0	0	0	0	0	1e-05	0.0001	0.00022	0	2e-05	8e-05	0	0	0	0	0	0	0	0
1950889	Clostridiales bacterium UBA4706	1e-05	2e-05	0.00021	0.00062	0.00139	6e-05	0.00113	0.00018	2e-05	2e-05	5e-05	0.00026	0	0	0	0	0	0	2e-05	2e-05	6e-05	0.00071	0	4e-05	0.00055	0	0	0	0	0	0	0	0	0	2e-05	0.00015	0.00076	1e-05	0.00026	0.0024	0	0	0	0	0	0	0	0
1674848	Clostridiales bacterium Firm_10	0	0	2e-05	8e-05	3e-05	2e-05	9e-05	1e-05	2e-05	1e-05	2e-05	3e-05	0	0	0	0	0	0	5e-05	1e-05	2e-05	0.00012	0	2e-05	3e-05	0	0	0	0	0	0	0	0	1e-05	2e-05	3e-05	8e-05	1e-05	8e-05	0.00019	0	0	0	0	0	0	0	0
1950929	Clostridiales bacterium UBA7273	0	2e-05	5e-05	0.00046	0.00028	2e-05	0.00022	0.00013	5e-05	3e-05	2e-05	2e-05	0	0	0	0	0	0	7e-05	1e-05	3e-05	7e-05	0	5e-05	3e-05	0	0	0	0	0	0	0	0	0	2e-05	0.00053	0.00038	1e-05	0.00011	0.0001	0	0	0	0	0	0	0	0
1674852	Clostridiales bacterium Firm_14	0	0	0	1e-05	0	0	1e-05	0	0	0	0	1e-05	0	2e-05	2e-05	2e-05	0	0	0	0	0	0	0	0	0	2e-05	0	3e-05	0	0	2e-05	0	5e-05	0	0	0	1e-05	0	0	1e-05	0	0	0	0	3e-05	0	0	0
1950820	Clostridiales bacterium UBA1381	0	0	0	1e-05	0	0	1e-05	0	0	0	0	0	0	0	0	0	0	0	1e-05	0	1e-05	1e-05	0	1e-05	1e-05	0	0	0	0	0	0	0	0	0	1e-05	8e-05	1e-05	0	1e-05	1e-05	0	0	0	0	0	0	0	0
1676158	Clostridiales bacterium DTU087	0	0	0	1e-05	0	1e-05	1e-05	0	0	0	0	1e-05	0	0	0	0	0	0	0	0	1e-05	0	0	0	0	0	0	0	0	0	0	0	0	0	0	1e-05	1e-05	0	0	0	0	0	0	0	0	0	0	0
1676156	Clostridiales bacterium DTU078	0	0	1e-05	3e-05	1e-05	1e-05	1e-05	0	0	0	1e-05	3e-05	0	0	0	0	0	0	0	1e-05	1e-05	1e-05	0	1e-05	1e-05	0	0	0	0	0	0	0	0	0	0	1e-05	3e-05	0	2e-05	1e-05	0	0	0	0	0	0	0	0
1950909	Clostridiales bacterium UBA6114	0	0	1e-05	2e-05	2e-05	0	5e-05	1e-05	1e-05	1e-05	0	0	0	0	0	0	0	0	3e-05	0	1e-05	3e-05	0	2e-05	1e-05	0	0	0	0	0	0	0	0	0	1e-05	2e-05	3e-05	0	4e-05	3e-05	0	0	0	0	0	0	0	0
1950907	Clostridiales bacterium UBA5909	1e-05	4e-05	0.00015	0.00034	0.00064	5e-05	0.00075	5e-05	6e-05	5e-05	6e-05	0.00031	0	0	0	0	0	0	0.00012	2e-05	5e-05	0.00064	0	8e-05	0.00031	0	0	0	0	0	0	0	0	1e-05	3e-05	0.0002	0.00037	1e-05	0.00017	0.00154	0	0	0	0	0	0	0	0
1797682	Clostridiales bacterium GWF2_36_10	0	0	0	1e-05	0	0	0	0	0	0	0	0	0	0	0	0	0	0	0	0	0	0	0	0	0	0	0	0	0	0	0	0	0	0	0	0	1e-05	0	0	0	0	0	0	0	0	0	0	0
1950849	Clostridiales bacterium UBA2907	0	2e-05	4e-05	0.00026	8e-05	2e-05	0.00015	5e-05	3e-05	2e-05	2e-05	5e-05	0	0	0	0	0	0	5e-05	1e-05	3e-05	9e-05	0	3e-05	5e-05	0	0	0	0	0	0	0	0	1e-05	2e-05	8e-05	0.0003	1e-05	0.00011	0.00013	0	0	0	0	0	0	0	0
1674842	Clostridiales bacterium Firm_04	0	0	1e-05	8e-05	2e-05	1e-05	2e-05	0	2e-05	1e-05	1e-05	1e-05	0	0	0	0	0	0	1e-05	1e-05	1e-05	1e-05	0	1e-05	1e-05	0	0	0	0	0	0	0	0	0	1e-05	1e-05	5e-05	1e-05	1e-05	2e-05	5e-05	0	0	0	0	0	0	0
1950824	Clostridiales bacterium UBA1446	0	0	0	7e-05	2e-05	0	5e-05	2e-05	0	1e-05	0	1e-05	0	0	0	0	0	0	1e-05	0	1e-05	4e-05	0	1e-05	1e-05	0	0	0	0	0	0	0	0	0	1e-05	2e-05	4e-05	0	3e-05	2e-05	0	0	0	0	0	0	0	0
1950852	Clostridiales bacterium UBA3223	0	0	0	5e-05	1e-05	0	3e-05	1e-05	0	1e-05	1e-05	1e-05	0	0	0	0	0	0	1e-05	0	0	2e-05	0	0	1e-05	0	0	0	0	0	0	0	0	0	1e-05	2e-05	5e-05	0	3e-05	3e-05	0	0	0	0	0	0	0	0
1950834	Clostridiales bacterium UBA1770	0	0	0	1e-05	1e-05	0	2e-05	1e-05	1e-05	0	0	0	0	0	0	0	0	0	1e-05	0	0	1e-05	0	1e-05	1e-05	0	0	0	0	0	0	0	0	0	1e-05	2e-05	1e-05	0	2e-05	2e-05	0	0	0	0	0	0	0	0
1950842	Clostridiales bacterium UBA2658	0	1e-05	1e-05	5e-05	3e-05	1e-05	6e-05	2e-05	2e-05	1e-05	1e-05	2e-05	0	0	0	0	0	0	1e-05	1e-05	1e-05	4e-05	0	1e-05	1e-05	0	0	0	0	0	0	0	0	0	1e-05	3e-05	5e-05	1e-05	0.00013	5e-05	0	0	0	0	0	0	0	0
1950838	Clostridiales bacterium UBA1779	0	0	0	1e-05	0	0	1e-05	0	0	0	0	0	0	0	0	0	0	0	1e-05	0	0	1e-05	0	2e-05	0	0	0	0	0	0	0	0	0	0	0	1e-05	1e-05	0	1e-05	1e-05	0	0	0	0	0	0	0	0
1950915	Clostridiales bacterium UBA644	0	0	1e-05	2e-05	2e-05	0	4e-05	1e-05	1e-05	1e-05	1e-05	1e-05	0	0	0	0	0	0	2e-05	0	1e-05	2e-05	0	1e-05	1e-05	0	0	0	0	0	0	0	0	0	1e-05	0.00035	2e-05	0	1e-05	3e-05	0	0	0	0	0	0	0	0
1950900	Clostridiales bacterium UBA5448	0	0	0	1e-05	1e-05	0	1e-05	0	0	0	0	0	0	0	0	0	0	0	0	0	0	1e-05	0	1e-05	0	0	0	0	0	0	0	0	0	0	0	0	1e-05	0	2e-05	1e-05	0	0	0	0	0	0	0	0
1950918	Clostridiales bacterium UBA6981	0	0	1e-05	0.00013	5e-05	0	7e-05	1e-05	1e-05	1e-05	0	1e-05	0	0	0	0	0	0	1e-05	0	1e-05	4e-05	0	1e-05	1e-05	0	0	0	0	0	0	0	0	0	1e-05	6e-05	0.00012	0	0.00013	5e-05	0	0	0	0	0	0	0	0
1674845	Clostridiales bacterium Firm_07	0	0	0	2e-05	1e-05	0	2e-05	1e-05	0	0	0	1e-05	0	0	0	0	4e-05	0	2e-05	0	1e-05	2e-05	0	2e-05	1e-05	0	0	0	0	0	0	0	0	0	1e-05	1e-05	2e-05	0	2e-05	2e-05	0	0	0	0	0	0	0	0
1674846	Clostridiales bacterium Firm_08	0	0	1e-05	7e-05	2e-05	1e-05	4e-05	1e-05	1e-05	1e-05	1e-05	1e-05	0	0	0	0	0	0	3e-05	0	1e-05	3e-05	0	3e-05	1e-05	0	0	0	0	0	0	0	0	0	1e-05	2e-05	7e-05	0	3e-05	3e-05	0	0	0	0	0	0	0	0
1950828	Clostridiales bacterium UBA1738	0	0	0	1e-05	0	0	0	0	0	0	0	0	0	0	0	0	0	0	0	0	0	0	0	1e-05	0	0	0	0	0	0	0	0	0	0	0	0	1e-05	0	0	0	0	0	0	0	0	0	0	0
1674850	Clostridiales bacterium Firm_12	0	0	1e-05	2e-05	1e-05	1e-05	3e-05	1e-05	1e-05	1e-05	1e-05	1e-05	0	0	0	0	0	0	1e-05	0	2e-05	9e-05	0	2e-05	3e-05	0	0	0	0	0	0	0	0	0	2e-05	1e-05	2e-05	1e-05	3e-05	7e-05	0	0	0	0	0	0	0	0
1950808	Clostridiales bacterium UBA1194	0	0	0	1e-05	1e-05	0	1e-05	0	1e-05	0	0	0	0	0	0	0	0	0	0	0	0	1e-05	0	0	0	0	0	0	0	0	0	0	0	0	0	1e-05	1e-05	0	2e-05	1e-05	0	0	0	0	0	0	0	0
1950873	Clostridiales bacterium UBA4039	0	0	0	0	0	0	0	0	0	0	0	0	0	0	0	0	0	0	0	0	0	0	0	0	0	0	0	0	0	0	0	0	0	0	0	0	0	0	0	0	0	0	0	0	0	0	0	0
1671650	Clostridiales bacterium DTU032	0	0	0	0	0	0	0	0	0	0	0	0	0	0	0	0	0	0	0	0	0	0	0	0	0	0	0	0	0	0	0	0	0	0	0	0	0	0	1e-05	0	0	0	0	0	0	0	0	0
1674849	Clostridiales bacterium Firm_11	0	0	2e-05	2e-05	2e-05	2e-05	3e-05	1e-05	0	1e-05	1e-05	3e-05	0	0	0	0	0	0	3e-05	0	2e-05	8e-05	0	1e-05	3e-05	2e-05	0	0	0	0	0	0	0	0	1e-05	4e-05	2e-05	0	2e-05	7e-05	0	0	0	2e-05	0	3e-05	0	0
1321777	Clostridiales bacterium oral taxon 876	0	0	0	0	0	0	0	0	0	0	0	0	0	0	0	0	0	0	0	0	0	0	0	0	0	2e-05	2e-05	0	0	0	0	0	2e-05	0	0	0	0	0	1e-05	0	0	0	0	0	0	0	0	0
1671655	Clostridiales bacterium DTU070	0	0	0	1e-05	0	0	0	0	0	0	0	0	0	0	0	0	0	0	0	0	0	0	0	1e-05	0	0	0	0	0	0	0	0	0	0	0	0	1e-05	0	1e-05	0	0	0	0	0	0	0	0	0
1950859	Clostridiales bacterium UBA3582	0	0	0	1e-05	0	0	1e-05	0	0	0	0	0	0	0	0	0	0	0	0	0	0	1e-05	0	0	0	0	0	0	0	0	0	0	0	0	0	0	1e-05	0	1e-05	1e-05	0	0	0	0	0	0	0	0
1676160	Clostridiales bacterium DTU024	0	0	0	1e-05	1e-05	0	1e-05	0	0	0	0	1e-05	0	0	0	0	0	0	0	0	0	2e-05	0	1e-05	0	0	0	0	0	0	0	0	0	0	0	1e-05	1e-05	0	1e-05	1e-05	0	0	0	0	0	0	0	0
1950829	Clostridiales bacterium UBA1740	0	0	0	1e-05	0	0	1e-05	1e-05	0	0	0	0	0	0	0	0	0	0	0	0	0	1e-05	0	1e-05	0	0	0	0	0	0	0	0	0	0	0	1e-05	1e-05	0	1e-05	1e-05	0	0	0	0	0	0	0	0
1950850	Clostridiales bacterium UBA2922	0	0	0	1e-05	1e-05	0	1e-05	0	0	0	0	0	0	0	0	0	0	0	0	0	0	0	0	1e-05	0	0	0	0	0	0	0	0	0	0	0	0	1e-05	0	0	0	0	0	0	0	0	0	0	0
1950832	Clostridiales bacterium UBA1758	0	0	0	2e-05	1e-05	0	2e-05	0	0	0	0	0	0	0	0	0	0	0	1e-05	0	1e-05	1e-05	0	0	1e-05	0	0	0	0	0	0	0	0	0	1e-05	1e-05	2e-05	0	1e-05	1e-05	0	0	0	0	0	0	0	0
1950934	Clostridiales bacterium UBA7573	0	0	0	1e-05	1e-05	1e-05	1e-05	0	0	0	1e-05	1e-05	0	0	0	0	0	0	0	0	0	1e-05	0	1e-05	0	0	0	0	0	0	0	0	0	0	0	1e-05	1e-05	0	1e-05	1e-05	0	0	0	0	0	0	0	0
1895747	Clostridiales bacterium 43-6	0	0	0	2e-05	1e-05	0	2e-05	1e-05	1e-05	0	1e-05	1e-05	0	0	0	0	0	0	3e-05	1e-05	1e-05	2e-05	0	2e-05	1e-05	0	0	0	0	0	0	0	0	0	1e-05	2e-05	2e-05	0	3e-05	1e-05	0	0	0	0	0	0	0	0
1950892	Clostridiales bacterium UBA4821	0	0	0	0	0	0	0	0	0	0	0	0	0	0	0	0	0	0	0	0	0	0	0	0	0	0	0	0	0	0	0	0	0	0	0	0	0	0	0	0	0	0	0	0	0	0	0	0
1950899	Clostridiales bacterium UBA5446	0	0	1e-05	6e-05	3e-05	0	6e-05	2e-05	1e-05	1e-05	0	1e-05	0	0	0	0	0	0	1e-05	0	2e-05	3e-05	0	1e-05	1e-05	0	0	0	0	0	0	0	0	0	3e-05	3e-05	5e-05	0	0.00031	4e-05	0	0	0	0	0	0	0	0
1605376	Clostridiales bacterium PH28_bin88	0	0	0	1e-05	0	0	0	0	0	0	0	0	0	0	0	0	0	0	0	0	0	1e-05	0	0	0	0	0	0	0	0	0	0	0	0	0	0	1e-05	0	1e-05	0	0	0	0	0	0	0	0	0
1950911	Clostridiales bacterium UBA6363	0	0	1e-05	6e-05	1e-05	1e-05	5e-05	1e-05	2e-05	0	0	0	0	0	0	0	0	0	1e-05	0	0	1e-05	0	1e-05	1e-05	0	0	0	0	0	0	0	0	0	0	2e-05	9e-05	1e-05	0	0	0	0	0	0	0	0	0	0
1674854	Clostridiales bacterium Firm_16	0	0	0	2e-05	1e-05	0	1e-05	1e-05	0	0	0	1e-05	0	0	0	0	0	0	0	0	0	0	0	1e-05	1e-05	0	0	0	0	0	0	0	0	0	0	1e-05	2e-05	0	1e-05	0	0	0	0	0	0	0	0	0
1950920	Clostridiales bacterium UBA7001	0	0	1e-05	2e-05	0	0	0	0	0	0	0	0	0	0	0	0	0	0	0	0	0	0	0	0	0	0	0	0	0	0	0	0	0	0	0	1e-05	2e-05	0	0	0	0	0	0	0	0	0	0	0
1676154	Clostridiales bacterium DTU035	0	0	0	0	0	0	0	0	0	0	0	1e-05	6e-05	2e-05	4e-05	0.00016	0	8e-05	0	0	0	0	0	0	0	3e-05	5e-05	6e-05	0.0001	2e-05	0.00014	9e-05	5e-05	0	0	0	0	0	0	0	0.00026	0.00022	8e-05	0.0001	0.00013	4e-05	0.00013	0.0002
1950917	Clostridiales bacterium UBA6473	0	1e-05	0.00011	0.00039	0.00026	5e-05	0.00035	2e-05	5e-05	5e-05	7e-05	5e-05	0	0	0	0	0	0	3e-05	1e-05	3e-05	0.00015	0	3e-05	4e-05	0	0	0	0	0	0	0	0	0	3e-05	0.00022	0.00061	0	0.0001	0.00018	0	0	0	0	0	0	0	0
1950891	Clostridiales bacterium UBA4717	0	0	1e-05	9e-05	3e-05	1e-05	0.00014	0	1e-05	2e-05	0	1e-05	0	0	0	0	0	0	0	0	1e-05	2e-05	0	5e-05	1e-05	0	0	0	0	0	0	0	0	0	1e-05	0.00014	0.0001	0	1e-05	2e-05	0	0	0	0	0	0	0	0
1950933	Clostridiales bacterium UBA7568	0	0	1e-05	2e-05	1e-05	1e-05	4e-05	1e-05	1e-05	2e-05	0	0	0	0	0	0	0	0	0	0	1e-05	1e-05	0	1e-05	0	0	0	0	0	0	0	0	0	0	0	2e-05	3e-05	0	2e-05	2e-05	0	0	0	0	0	0	0	0
1950847	Clostridiales bacterium UBA2875	0	0	0	2e-05	1e-05	0	2e-05	0	0	0	0	0	0	0	0	0	0	0	0	0	0	0	0	0	0	0	0	0	0	0	0	0	0	0	0	1e-05	1e-05	0	0	0	0	0	0	0	0	0	0	0
1950931	Clostridiales bacterium UBA738	0	1e-05	0.00015	0.0005	0.00061	5e-05	0.00088	3e-05	2e-05	3e-05	4e-05	0.00026	0	0	0	0	0	0	1e-05	1e-05	2e-05	0.00033	0	3e-05	0.00017	0	0	0	0	0	0	0	0	0	3e-05	9e-05	0.00079	1e-05	0.0002	0.00135	0	0	0	0	0	0	0	0
1950914	Clostridiales bacterium UBA6412	0	1e-05	2e-05	0.00025	9e-05	0	0.00011	2e-05	0	0	0	1e-05	0	0	0	0	0	0	0	0	0	2e-05	0	1e-05	1e-05	0	0	0	0	0	0	0	0	0	0	0.00013	0.00022	0	5e-05	3e-05	0	0	0	0	0	0	0	0
1950919	Clostridiales bacterium UBA6999	0	0	1e-05	9e-05	3e-05	0	6e-05	1e-05	1e-05	0	0	2e-05	0	0	0	0	0	0	2e-05	0	1e-05	3e-05	0	1e-05	1e-05	0	0	0	0	0	0	0	0	0	1e-05	4e-05	8e-05	0	9e-05	5e-05	0	0	0	0	0	0	0	0
1950908	Clostridiales bacterium UBA5962	0	0	0	1e-05	0	0	0	0	0	0	0	0	0	0	0	0	0	0	0	0	0	0	0	1e-05	0	0	0	0	0	0	0	0	0	0	0	0	1e-05	0	1e-05	0	0	0	0	0	0	0	0	0
1671661	Clostridiales bacterium DTU089	0	0	1e-05	2e-05	2e-05	0	3e-05	1e-05	1e-05	1e-05	1e-05	0	0	0	0	0	0	0	0	0	8e-05	2e-05	0	8e-05	0	0	0	0	0	0	0	0	0	0	0	2e-05	2e-05	0	3e-05	1e-05	0	0	0	0	0	0	0	0
1950862	Clostridiales bacterium UBA3678	0	0	1e-05	2e-05	0	0	0	0	0	0	0	0	0	0	0	0	0	0	0	0	0	1e-05	0	1e-05	0	0	0	0	0	0	0	0	0	0	0	3e-05	2e-05	0	0	1e-05	0	0	0	0	0	0	0	0
1671651	Clostridiales bacterium DTU036	0	0	0	0	0	0	0	0	0	0	0	0	0	0	0	0	0	0	0	0	0	0	0	0	0	0	0	0	0	0	0	0	0	0	0	1e-05	0	0	0	0	0	0	0	0	0	0	0	0
1950894	Clostridiales bacterium UBA4959	0	0	0	1e-05	1e-05	0	1e-05	0	0	0	0	1e-05	0	0	0	0	0	0	0	0	0	1e-05	0	1e-05	0	0	0	0	0	0	0	0	0	0	0	1e-05	1e-05	0	2e-05	1e-05	0	0	0	0	0	0	0	0
1950875	Clostridiales bacterium UBA4139	0	0	0	1e-05	0	0	0	0	0	0	0	0	0	0	0	0	0	0	0	0	0	0	0	0	0	0	0	0	0	0	0	0	0	0	0	0	1e-05	0	0	0	0	0	0	0	2e-05	0	0	0
1950878	Clostridiales bacterium UBA4304	0	0	1e-05	0.0001	4e-05	0	0.0001	0	0	0	1e-05	0	0	0	0	0	0	0	0	0	0	1e-05	0	0	0	0	0	0	0	0	0	0	0	0	2e-05	1e-05	0.00012	0	0.00013	3e-05	0	0	0	0	0	0	0	0
1671647	Clostridiales bacterium DTU012	0	0	0	1e-05	0	0	0	0	0	0	0	0	0	0	0	0	0	0	0	0	0	0	0	0	0	0	0	0	0	0	0	0	0	0	0	0	0	0	1e-05	0	0	0	0	0	0	0	0	0
1950888	Clostridiales bacterium UBA4701	0	0	2e-05	0.00034	6e-05	0	0.00016	1e-05	1e-05	0	1e-05	1e-05	0	0	0	0	0	0	2e-05	0	0	3e-05	0.02466	0	1e-05	0	0	0	0	0	0	0	0	0	0	0.00012	0.00029	1e-05	2e-05	5e-05	0	0	0	0	0	0	0	0
1797683	Clostridiales bacterium GWF2_38_85	0	0	0	0	0	0	0	0	0	0	0	0	0	0	0	0	0	0	0	0	0	0	0	1e-05	0	0	0	0	0	0	0	0	0	0	0	0	1e-05	1e-05	1e-05	0	0	0	0	0	0	0	0	0
1950812	Clostridiales bacterium UBA1246	0	0	1e-05	4e-05	2e-05	0	4e-05	1e-05	0	0	0	1e-05	0	0	0	0	0	0	0	0	1e-05	2e-05	0	1e-05	0	0	0	0	0	0	0	0	0	0	1e-05	2e-05	4e-05	0	9e-05	3e-05	0	0	0	0	0	0	0	2e-05
1686289	Clostridiales bacterium mt11	0	0	0	1e-05	0	0	0	0	0	0	0	0	0	0	0	0	0	0	0	0	0	0	0	0	0	0	0	0	0	0	0	0	0	0	0	0	1e-05	0	0	0	0	0	0	0	0	0	0	4e-05
1676157	Clostridiales bacterium DTU086	0	0	0	0	0	0	0	0	0	0	0	0	0	0	0	0	0	0	0	0	0	0	0	0	0	0	0	0	0	0	0	0	0	0	0	0	0	0	0	0	0	0	0	0	0	0	0	0
1676153	Clostridiales bacterium DTU033	0	0	0	1e-05	1e-05	0	1e-05	0	0	0	0	1e-05	0	0	0	0	0	0	0	0	0	1e-05	0	0	0	0	0	0	0	0	0	0	0	0	0	1e-05	1e-05	0	2e-05	1e-05	0	0	0	0	0	0	0	0
1797680	Clostridiales bacterium GWD2_32_59	0	0	0	0	0	0	0	0	0	0	0	0	0	0	0	0	0	0	0	0	0	0	0	0	0	0	0	0	0	0	0	0	0	0	0	0	0	0	0	0	0	0	0	0	0	0	0	0
1671656	Clostridiales bacterium DTU072	0	0	0	1e-05	0	0	1e-05	0	0	0	0	0	0	0	0	0	0	0	0	0	0	0	0	0	0	0	0	0	0	0	0	0	0	0	0	1e-05	1e-05	0	1e-05	0	0	0	0	0	0	0	0	0
1674851	Clostridiales bacterium Firm_13	0	0	0	0	0	0	0	0	0	0	0	0	0	0	0	0	0	0	0	0	0	0	0	0	0	0	0	0	0	0	0	0	0	0	0	0	0	0	1e-05	0	0	0	0	0	0	0	0	0
1950837	Clostridiales bacterium UBA1777	0	1e-05	2e-05	0.00026	7e-05	1e-05	0.00014	1e-05	1e-05	1e-05	1e-05	1e-05	0	0	0	0	0	0	1e-05	0	2e-05	4e-05	0	4e-05	1e-05	0	0	0	0	0	0	0	0	0	1e-05	0.0001	0.00023	0	0.00011	7e-05	0	0	0	0	0	0	0	0
1674844	Clostridiales bacterium Firm_06	0	0	0	1e-05	0	0	1e-05	1e-05	0	0	0	0	0	0	0	0	0	0	0	0	0	0	0	0	0	0	0	0	0	0	0	0	0	0	0	0	1e-05	0	0	0	0	0	0	0	0	0	0	0
1950806	Clostridiales bacterium UBA1049	0	0	0	0	0	0	0	0	0	0	0	0	0	0	0	0	0	0	0	0	0	0	0	0	0	0	0	0	0	0	0	0	0	0	0	1e-05	0	0	1e-05	0	0	0	0	0	0	0	0	0
1950830	Clostridiales bacterium UBA1742	0	0	1e-05	2e-05	0	0	0	0	0	0	0	0	0	0	0	0	0	0	0	0	0	0	0	1e-05	0	0	0	0	0	0	0	0	0	0	2e-05	3e-05	2e-05	0	0	1e-05	0	0	0	0	0	0	0	0
1674843	Clostridiales bacterium Firm_05	0	0	0	3e-05	1e-05	0	1e-05	0	0	0	0	0	0	0	0	0	0	3e-05	0	0	0	1e-05	0	0	0	0.00509	0	3e-05	0	0	0	0	4e-05	0	0	1e-05	7e-05	0	0	0	0	0	1e-05	0	0.00035	0	2e-05	0
1950831	Clostridiales bacterium UBA1752	0	0	0	1e-05	1e-05	0	1e-05	0	0	0	0	0	0	0	0	0	0	0	0	0	0	1e-05	0	1e-05	0	0	0	0	0	0	0	0	0	0	0	1e-05	2e-05	0	1e-05	1e-05	0	0	0	0	0	0	0	0
1673726	Clostridiales bacterium SIT11	0	0	0	0	0	0	0	0	0	0	0	0	0	0	0	0	0	0	0	0	0	0	0	0	0	0	0	0	0	0	0	0	0	0	0	0	0	0	0	0	0	0	0	0	0	0	0	0
1950835	Clostridiales bacterium UBA1774	0	0	1e-05	7e-05	3e-05	0	6e-05	2e-05	1e-05	1e-05	1e-05	1e-05	0	0	0	0	0	0	3e-05	0	1e-05	4e-05	0	1e-05	2e-05	0	0	0	0	0	0	0	0	0	2e-05	3e-05	7e-05	1e-05	6e-05	4e-05	0	0	0	0	0	0	0	0
1950836	Clostridiales bacterium UBA1775	0	0	0	1e-05	0	0	0	0	0	0	1e-05	0	0	0	0	0	0	0	0	0	0	0	0	1e-05	0	0	0	0	0	0	0	0	0	0	0	0	1e-05	0	1e-05	0	0	0	0	0	0	0	0	0
384638	[Bacteroides] pectinophilus	0.00024	0.00086	0.00136	0.00508	0.00083	0.0015	0.00044	0.00034	0.00215	0.00139	0.00122	0.00195	0.00106	0.0009	0	0.00049	0.00046	0.00226	0.00163	0.00079	0.00041	0.00078	0	0.00251	0.00188	0.0041	0.00552	0	0	0.00644	0	0.00228	0.01003	0.00079	0.00158	0.01531	0.00143	0.00176	0.0003	0.00039	0.00067	0.00388	0.00485	0.00331	0.01682	0.00588	0.00577	0
1297617	Intestinimonas butyriciproducens	0.0001	0.00031	0.00076	0.00089	0.00148	0.0003	0.0017	0.00067	0.00023	0.0004	0.0003	0.00052	0	0	0	0	0	0	0.00021	0.00019	0.00019	0.0009	0	0.00051	0.00042	0	0	0	0	0	0	0	0	8e-05	0.00045	0.00486	0.00104	5e-05	0.00684	0.00087	0	0	0	0	0	0	0	0
1673721	Intestinimonas massiliensis	4e-05	0.00015	0.00028	0.00049	0.00062	0.00019	0.0005	0.00019	0.00037	0.00026	0.00022	0.00023	0	0	0	0	0	0	0.00026	0.00012	0.00033	0.00051	0	0.00028	0.00084	0	0	0	0	0	0	0	0	7e-05	0.00041	0.00047	0.0006	0.00014	0.00146	0.00041	0	0	0	0	0	0	0	0
420336	Epulopiscium sp. 'N.t. morphotype B'	0	0	0	1e-05	0	0	0	0	0	0	0	0	0	0	0	0	0	0	0	0	0	0	0	0	0	0	0	0	0	0	0	0	0	0	0	0	1e-05	0	0	0	0	0	0	0	0	0	0	0
1764963	Epulopiscium sp. Nele67-Bin005	0	0	0	1e-05	0	0	0	0	0	0	0	0	0	0	0	0	0	0	0	0	0	0	0	0	0	0	0	0	0	0	0	0	0	0	0	0	1e-05	0	0	0	0	0	0	0	0	0	0	0
1884656	Epulopiscium sp. Nuni2H_MBin001	0	0	0	0	0	0	0	0	0	0	0	0	0	0	0	0	0	0	0	0	0	0	0	0	0	0	0	0	0	0	0	0	0	0	0	0	0	0	0	0	0	0	0	0	0	0	0	0
1764958	Epulopiscium sp. AS2M-Bin001	0	0	0	0	0	0	0	0	0	0	0	0	0	0	0	0	0	0	0	0	0	0	0	0	0	0	0	0	0	0	0	0	0	0	0	0	0	0	0	0	0	0	0	0	0	0	0	0
1764962	Epulopiscium sp. Nele67-Bin004	0	0	0	1e-05	0	0	0	0	0	0	1e-05	0	0	0	0	0	0	0	0	0	0	0	0	0	0	0	0	0	0	0	0	0	0	0	0	0	1e-05	0	0	0	0	0	0	0	0	0	0	0
1884657	Epulopiscium sp. Nuni2H_MBin003	0	0	0	0	0	0	0	0	0	0	0	0	0	0	0	0	0	0	0	0	0	0	0	0	0	0	0	0	0	0	0	0	0	0	0	0	0	0	0	0	0	0	0	0	0	0	0	0
938289	Levyella massiliensis	0	1e-05	0	3e-05	1e-05	1e-05	2e-05	3e-05	1e-05	0	1e-05	1e-05	0	0	0	0	0	0	1e-05	1e-05	1e-05	2e-05	0	1e-05	2e-05	0	0	0	5e-05	0	0	0	0	0	0	2e-05	4e-05	0	1e-05	1e-05	0	0	0	2e-05	0	0	0	0
415015	Proteiniborus ethanoligenes	0	0	0	1e-05	0	0	0	0	0	0	0	0	0	0	0	0	0	0	0	0	0	0	0	0	0	0	0	0	0	0	0	0	0	0	0	0	1e-05	0	0	0	0	0	0	0	0	0	0	0
1889883	Proteiniborus sp. DW1	0	0	0	0	0	0	0	0	0	0	0	0	0	0	0	0	0	0	0	0	0	0	0	0	0	0	0	0	0	0	0	0	0	0	0	0	0	0	0	0	0	0	0	0	0	0	0	0
312168	Anaerovirgula multivorans	0	0	0	1e-05	1e-05	0	0	0	0	0	0	0	0	0	0	0	0	0	0	0	0	0	0	0	0	0	0	0	0	0	0	0	0	0	0	1e-05	1e-05	0	0	0	0	0	0	0	0	0	0	0
1496	Clostridioides difficile	0.00025	0.00031	0.00015	0.00044	0.00014	0.00026	0.00014	0.00015	0.00018	0.00015	0.00023	0.00084	0.00697	0.00063	0.00538	0	0.01611	0	0.00012	0.00036	0.00024	0.00014	0	0.00024	0.00035	0.01289	0.00066	0.00382	0	0.04109	0.07835	0	0.00612	0.00049	0.00019	0.00029	0.00037	0.00012	0.00022	7e-05	0.00857	0.02216	0.00178	0.0115	0.05978	0.02242	0.0206	0
1540	Clostridioides mangenotii	0	0	0	1e-05	0	0	0	0	0	0	0	0	0.00012	4e-05	0.00015	0	0.00018	0	0	0	0	0	0	0	0	0.00027	0	0.00018	0	0.00044	0.00125	0	0.00021	0	0	0	0	0	0	0	0.00033	0.00026	8e-05	0.00018	0.00116	0.00054	0.0004	0
1261	Peptostreptococcus anaerobius	1e-05	1e-05	5e-05	0.00017	1e-05	6e-05	1e-05	1e-05	3e-05	1e-05	1e-05	0	0	0	0	0	0	0	1e-05	3e-05	1e-05	1e-05	0	1e-05	3e-05	7e-05	0	0	0	0.00031	0.00025	0	0	0	3e-05	3e-05	0.00018	2e-05	1e-05	0	0.00027	0.0001	3e-05	7e-05	0.00014	0.00015	0	0
72304	Peptostreptococcus sp. D1	1e-05	0	0	1e-05	2e-05	0	1e-05	0	1e-05	1e-05	1e-05	1e-05	0	0	0	0	0	0	1e-05	0	0	1e-05	0	0	1e-05	0	0	0	0	0	0	0	0	1e-05	2e-05	1e-05	1e-05	0	1e-05	0	0	0	0	0	0	0	0	0
1219626	Peptostreptococcus sp. MV1	1e-05	1e-05	0	2e-05	1e-05	1e-05	1e-05	0	1e-05	0	1e-05	0	0	0	0	0	0	0	0	0	1e-05	0	0	1e-05	1e-05	0	0	0	0	0	0	0	0	0	0	1e-05	2e-05	0	1e-05	0	0	0	0	0	0	0	0.00042	0
341694	Peptostreptococcus stomatis	0	0	0	1e-05	0	0	0	0	0	0	0	0	0	0	0	0	0	0	0	0	0	0	0	1e-05	0	0	0	0	0	0	0	0	0	0	0	0	1e-05	0	0	0	0	0	0	0	0	0	0	0
2045015	Peptostreptococcus sp. Marseille-P4308	0	0	0	1e-05	0	0	0	0	0	0	0	0	3e-05	0	0	0	0	0	0	0	0	0	0	0	0	0	0	0.00075	0	0.00018	0.00017	0	0	0	0	0	0	0	0	0	0	4e-05	1e-05	2e-05	9e-05	5e-05	4e-05	0
29359	Asaccharospora irregularis	1e-05	0	4e-05	1e-05	0	3e-05	1e-05	1e-05	0	0	4e-05	0	0	0	0	0	0	0	0	1e-05	0	0	0	0	0	0	0	0	0	0	0	0	0	0	2e-05	1e-05	0	0	1e-05	0	0	0	0	0	0	0	0	0
1776391	Romboutsia timonensis	0	1e-05	0.00016	4e-05	3e-05	0.00022	4e-05	0	2e-05	3e-05	0.00129	0	0.00044	0	0	0	0.00137	0	3e-05	0.00017	2e-05	0	0	0.00013	0	0.00018	0	0.00305	0	0.00182	0.00072	0	0.00616	0	0	2e-05	4e-05	3e-05	1e-05	0	0	0.00031	0.00607	0.00037	0.00338	0.01047	0.00023	0
1720299	Romboutsia sp. MT17	0	0	0	0	0	0	0	0	0	0	2e-05	0	0	0	0	0	0	0	0	0	0	0	0	0	0	0	0	0	0	0	0	0	0	0	0	0	0	0	0	0	0	0	0	0	0	0	0	0
1301100	[Clostridium] dakarense	0	0	0	1e-05	0	0	0	0	0	0	0	0	0	0	0	0	0	0	0	0	0	0	0	0	0	0	0	0	0	0	0	0	0	0	0	0	1e-05	0	0	0	0	0	0	0	0	0	0	0
2020949	Romboutsia weinsteinii	0	0	0	1e-05	0	0	0	0	0	0	0	0	0	0	0	0	0	0	0	0	0	0	0	0	0	0	0	0	0	0	0	0	0	0	0	0	1e-05	0	0	0	0	0	0	0	0	0	0	0
1537	Romboutsia lituseburensis	0	0	0	0	0	0	0	0	0	0	0	0	0	0	0	0	0	0	0	0	0	0	0	0	0	0	0	0	0	0	0	0	0	0	0	0	0	0	0	0	0	0	0	0	0	0	0	0
2020948	Romboutsia maritimum	0	0	0	1e-05	0	0	0	0	0	0	0	0	0.00016	0	4e-05	0	0.00036	3e-05	0	0	0	0	0	0	0	0.00029	3e-05	0.00025	0.0001	0.00107	0.00088	0	0.0002	0	0	0	0	0	0	0	0.00013	0.00076	5e-05	0.00017	0.0007	0.00045	0.00037	0
1871336	Criibacterium bergeronii	1e-05	1e-05	7e-05	0.00053	2e-05	4e-05	0.00037	2e-05	3e-05	8e-05	2e-05	2e-05	0	0	0	0	0	0	1e-05	2e-05	1e-05	6e-05	0	1e-05	2e-05	0	0	0	0	0	0	0	0	1e-05	6e-05	7e-05	0.00038	1e-05	0.0002	3e-05	0	0	0	0	0	0	0	0
261299	Intestinibacter bartlettii	1e-05	1e-05	0.00014	2e-05	1e-05	0.00016	1e-05	2e-05	4e-05	6e-05	6e-05	1e-05	0.00348	0.00213	0.00227	0.00091	0.00721	0.00153	1e-05	2e-05	1e-05	0	0	1e-05	5e-05	0.00433	0.00171	0.00556	0.00414	0.00857	0.01018	0.00033	0.00493	7e-05	2e-05	0	1e-05	2e-05	3e-05	0	0.01022	0.0025	0.00165	0.0051	0.00855	0.00504	0.00794	0.0018
1476973	Peptostreptococcaceae bacterium VA2	0	0	0	1e-05	1e-05	1e-05	0	0	0	0	2e-05	0	0.00042	0	0.00022	0	0.00058	0	0	1e-05	0	0	0	1e-05	0	0.0008	9e-05	0.00048	0	0.00201	0.00556	0	0.00052	0	0	0	1e-05	0	0	0	0.00015	0.00087	0.0001	0.00066	0.00407	0.00045	0.00237	0
936556	Peptostreptococcaceae bacterium AS15	0	0	0	0	0	0	0	0	0	0	0	0	0	0	0	0	0	0	0	0	0	0	0	1e-05	0	0	0	0	0	0	0	0	0	0	0	0	0	0	0	0	0	0	0	0	0	0	0	0
89152	[Clostridium] hiranonis	0	0	0	0	0	0	0	0	0	0	0	0	0.00012	0	2e-05	0	8e-05	5e-05	0	0	0	0	0	0	0	0.00017	3e-05	0.0001	0	0.00049	0.00076	0	0.00018	0	0	0	0	0	0	0	0.00047	0.00012	8e-05	0.00031	0.00074	0.00041	0.00017	0
1321783	Peptostreptococcaceae bacterium oral taxon 113	0	0	0	0	0	0	0	0	0	1e-05	0	0	7e-05	0	6e-05	0	0.0001	0	0	0	0	0	0	1e-05	0	0	0	0.00017	0	0	0	0	0	0	1e-05	1e-05	0	0	0	0	9e-05	7e-05	0	0	6e-05	0	0	5e-05
214905	Tepidibacter thalassicus	0	0	0	0	0	0	0	0	0	0	0	0	0	0	0	0	0	0	0	0	0	0	0	0	0	0	0	0	0	0	0	0	0	0	0	0	0	0	0	0	0	0	0	0	0	0	0	0
655607	Tepidibacter mesophilus	0	0	0	1e-05	0	0	0	0	0	0	0	0	0	0	0	0	0	0	0	0	0	0	0	1e-05	0	0	0	0	0	0	0	0	0	0	0	0	1e-05	0	0	0	0	0	0	0	0	0	0	0
227138	Tepidibacter formicigenes	0	0	0	1e-05	0	0	0	0	0	0	0	0	0.00011	0	0.00011	2e-05	8e-05	0	0	0	0	0	0	0	0	4e-05	0	3e-05	0	0.00019	0.0002	0	0.0001	0	0	0	1e-05	0	0	0	5e-05	0.00012	2e-05	0	0.00015	0.00015	0.00014	0
796937	Peptoanaerobacter stomatis	0	0	1e-05	2e-05	1e-05	1e-05	1e-05	1e-05	1e-05	1e-05	2e-05	2e-05	0	0	0	0	0	0	1e-05	1e-05	0	1e-05	0	1e-05	1e-05	0	0	6e-05	0	7e-05	0	0	0	0	1e-05	1e-05	2e-05	0	0	0	0	0	0	0	0.00072	8e-05	5e-05	0
39498	[Eubacterium] yurii	0	0	0	1e-05	0	0	0	0	0	0	0	0	0.00339	0.001	0.00076	0.00027	0.00258	0.00047	0	0	0	0	0	0	0	0.00358	0.00074	0.00697	0.00153	0.00166	0.00262	9e-05	0.00232	0	0	0	1e-05	0	0	0	0.00756	0.00075	0.00074	0.00162	0.00198	0	0.00365	0.00052
1505	Paeniclostridium sordellii	0	0	0	1e-05	0	0	0	0	0	0	0	0	0	0	0.00031	0	0	0	0	0	0	0	0	1e-05	0	0	0	0	0	0	0	0	0	0	0	0	1e-05	0	0	0	0	0	0	4e-05	0	0	0	0
143361	Filifactor alocis	0	0	1e-05	0	0	1e-05	0	1e-05	0	0	0	0	0	0	0	0	0	0	0	0	0	0	0	0	0	0	0	0	0	0	0	0	0	0	1e-05	1e-05	0	0	1e-05	0	0	0	0	0	0	0	0	0
1511	Acetoanaerobium sticklandii	0	0	0	0	0	0	0	0	0	0	0	0	0	0	0	0	4e-05	0	0	0	0	0	0	0	0	0	0	0	0	0	3e-05	0	2e-05	0	0	0	0	0	0	0	5e-05	0	0	0	0	4e-05	0	2e-05
745369	Acetoanaerobium noterae	0	0	0	0	0	0	0	0	0	0	0	0	0	0	0	0	0	0	0	0	0	0	0	0	0	0	0	0	0	0	0	0	0	0	0	0	0	0	0	0	0	0	0	0	0	0	0	0
1629550	Paraclostridium benzoelyticum	0	0	0	0	0	0	0	0	0	0	0	0	0	0	0	0	0	0	0	0	0	0	0	0	0	0	0	0	0	0	0	0	0	0	0	0	0	0	0	0	0	0	0	0	0	0	0	0
1776384	Emergencia timonensis	9e-05	0.00014	3e-05	2e-05	4e-05	3e-05	9e-05	9e-05	6e-05	6e-05	3e-05	1e-05	0	0	0	0	0	0	3e-05	0.00012	0.00018	5e-05	0	4e-05	0.00034	0	0	0	0	0	0	0	0	5e-05	6e-05	6e-05	4e-05	2e-05	8e-05	0.0001	0	0	0	0	2e-05	0	0	0
1951596	Clostridiales bacterium UBA643	1e-05	1e-05	1e-05	2e-05	1e-05	1e-05	0.00099	2e-05	1e-05	1e-05	1e-05	2e-05	0	0	0	0	0	0	6e-05	1e-05	2e-05	4e-05	0	2e-05	4e-05	0	0	0	0	0	0	0	0	1e-05	2e-05	1e-05	2e-05	1e-05	1e-05	2e-05	0	0	0	0	0	0	0	0
1230734	Clostridiales bacterium S5-A14a	0	0	0	1e-05	0	0	0	1e-05	1e-05	0	1e-05	0	8e-05	9e-05	0.00032	2e-05	0.00028	0	0	0	0	0	0	1e-05	1e-05	0.00034	0.0001	0.0001	0	2e-05	5e-05	0	2e-05	0	1e-05	0	1e-05	0	2e-05	0	0.00015	0	1e-05	0.0001	0.00396	5e-05	0.00027	0
1951594	Clostridiales bacterium UBA2867	0	0	0	0	0	0	1e-05	0	0	0	0	0	0	0	0	0	0	0	0	0	0	0	0	1e-05	0	0	0	0	0	0	0	0	0	0	0	1e-05	1e-05	0	1e-05	0	0	0	0	0	0	0	0	0
1951598	Clostridiales bacterium UBA7285	0	0	0	1e-05	0	0	1e-05	0	0	0	0	0	0	0	0	0	0	0	0	0	0	0	0	0	0	0	0	0	0	0	0	0	0	0	1e-05	1e-05	1e-05	0	2e-05	1e-05	0	0	0	0	0	0	0	0
1951595	Clostridiales bacterium UBA5460	0	0	0	1e-05	0	0	0	1e-05	0	0	0	0	0	0	0	0	0	0	0	0	0	0	0	1e-05	0	0	0	0	0	0	0	0	0	0	0	0	1e-05	0	2e-05	0	0	0	0	0	0	0	0	0
1870997	Ileibacterium massiliense	1e-05	6e-05	1e-05	2e-05	2e-05	1e-05	2e-05	3e-05	1e-05	3e-05	1e-05	2e-05	0	0.00018	0	0	0	0	1e-05	5e-05	2e-05	1e-05	0	2e-05	3e-05	0.00047	0	8e-05	6e-05	0.00053	0	0	2e-05	0.00015	9e-05	1e-05	1e-05	1e-05	2e-05	0	5e-05	4e-05	0	0.00028	0.00433	0	0.00059	0
51123	[Eubacterium] saphenum	1e-05	2e-05	0	0	0	0	0	0	0	0	0	0	4e-05	0	0	0	0	0	0	2e-05	0	0	0	0	0	2e-05	0	0	0.00053	0.0003	4e-05	0	9e-05	0	0	0	0	0	0	0	0.00048	0	6e-05	0.00019	0.00169	0.00029	0.00219	0
35519	Mogibacterium timidum	0	0	0	0	0	0	1e-05	0	0	0	0	0	0	0	0	0	0	0	0	0	0	0	0	1e-05	0	0	0	0	0	0	0	0	0	0	0	0	0	0	0	0	0	0	0	0	0	0	0	0
86332	Mogibacterium pumilum	0	2e-05	1e-05	1e-05	0	0	3e-05	4e-05	1e-05	2e-05	1e-05	2e-05	0	0	0	0.0008	0.00156	7e-05	0	1e-05	2e-05	1e-05	0	1e-05	1e-05	0.00067	0	0	0	0	0.00021	0	0.00019	0	1e-05	1e-05	1e-05	0	1e-05	1e-05	0	7e-05	0	0.00053	0.0024	0	0.00036	2e-05
56774	[Eubacterium] infirmum	0	0	0	1e-05	0	0	0	1e-05	0	0	0	1e-05	0	0	0	0	0	0.0002	1e-05	0	1e-05	1e-05	0	1e-05	0	0	0	0	0	0	0	0	0	0	1e-05	0	1e-05	0	3e-05	0	0	0	0	0	0	0	0	0
35517	[Eubacterium] brachy	0	0	0	1e-05	0	0	0	1e-05	0	0	0	0	0.00054	0.00023	0.0004	0.00011	5e-05	0.0003	0	0	0	0	0	1e-05	1e-05	0.0002	0.00023	0.00097	0.00049	0.00021	9e-05	0.00019	0.00037	0	0	1e-05	1e-05	0	1e-05	0	0.00107	0.00011	0.00019	4e-05	0.00054	0.00037	0.00061	0.00032
35518	[Eubacterium] nodatum	0	0	0	1e-05	1e-05	0	0	1e-05	0	0	0	0	0	0	0	0	0	0	0	0	1e-05	0	0	1e-05	0	0	0	0	0	0	0	0	0	0	1e-05	1e-05	1e-05	0	3e-05	0	0	0	0	0	0	0	0	0
109327	Anaerovorax odorimutans	0	0	0	1e-05	1e-05	0	0	0	0	0	0	0	0	0	0	0	0	0	0	0	0	0	0	0	0	0	0	0	0	0	0	0	0	0	1e-05	0	1e-05	0	2e-05	0	0	0	0	0	0	0	0	0
143393	[Eubacterium] sulci	0	5e-05	1e-05	1e-05	0	0	2e-05	3e-05	1e-05	0	1e-05	0	0	0	0	0.00075	0	0	0	3e-05	2e-05	0	0	1e-05	1e-05	0	0	0	0	0	0	0	0	0	1e-05	1e-05	1e-05	0	1e-05	1e-05	0	0	0	0	0.00213	0	0	0
1871012	Mobilibacterium timonense	0	0	1e-05	1e-05	1e-05	0	2e-05	1e-05	1e-05	1e-05	0	2e-05	0	0	0	0	0	0.00012	1e-05	0	1e-05	3e-05	0	1e-05	0	3e-05	0	0.00173	0	0	0	0	0	0	1e-05	1e-05	1e-05	0	2e-05	2e-05	9e-05	0	0	0	0.00011	0	0	0
65403	Acidaminobacter hydrogenoformans	1e-05	0	0	1e-05	0	0	1e-05	0	0	0	0	1e-05	0	0	0	0	0	0	2e-05	0	1e-05	2e-05	0	0	1e-05	0	0	0	0	0	0	0	0	0	0	0	1e-05	0	0	1e-05	0	0	0	0	0	0	0	0
1048380	Fusibacter sp. 3D3	0	0	0	1e-05	0	0	0	0	0	0	0	0	0	4e-05	0	2e-05	0	0	0	0	0	0	0	0	0	0	0	3e-05	5e-05	0	0	2e-05	0	0	0	0	1e-05	0	1e-05	0	5e-05	0	6e-05	0	0	0	2e-05	2e-05
28034	Sulfobacillus thermosulfidooxidans	0	0	0	1e-05	0	0	0	0	0	0	0	0	0	0	0	0	0	0	0	0	0	0	0	0	0	0	0	0	0	0	0	0	0	0	0	0	1e-05	0	0	0	0	0	0	0	2e-05	0	0	0
53633	Sulfobacillus acidophilus	0	0	0	0	0	0	0	0	0	0	0	0	0	4e-05	2e-05	4e-05	0	4e-05	0	0	0	0	0	0	0	0	2e-05	0	0.00015	0	0	0	3e-05	0	0	0	0	0	0	0	0.00016	7e-05	1e-05	0	0	0	2e-05	0
73919	Thermaerobacter marianensis	0	0	0	1e-05	0	0	0	0	0	0	0	1e-05	0	0	0	0	0	0	0	0	0	1e-05	0	0	0	0	0	0	0	0	0	0	0	0	0	0	1e-05	0	0	1e-05	0	0	0	0	2e-05	0	0	0
175696	Thermaerobacter subterraneus	0	0	0	0	0	0	1e-05	0	0	0	0	0	0	0	0	0	0	0	1e-05	0	0	1e-05	0	0	1e-05	0	0	0	0	0	0	0	0	0	0	0	0	0	0	1e-05	0	0	0	0	0	0	0	0
285110	Carboxydocella sporoproducens	0	0	0	0	0	0	0	0	0	0	0	0	0	0	0	0	0	0	1e-05	0	0	1e-05	0	0	0	0	0	0	0	0	0	0	0	0	0	0	0	0	0	0	0	0	0	0	0	0	0	0
1930012	Christensenellaceae bacterium Phil1	6e-05	0.00013	0.00033	0.00394	0.00492	0.0002	0.00582	0.00054	0.00032	0.00021	0.00017	0.00036	0	4e-05	0	0	0	0	0.00017	0.00011	0.00012	0.00089	0	0.00135	0.00028	0	0	0	0	0	0	0	0	6e-05	0.00017	0.00132	0.00255	6e-05	0.01729	0.00041	0	0	0	0	3e-05	0	2e-05	0
1930013	Christensenellaceae bacterium Phil7	1e-05	2e-05	4e-05	0.00026	7e-05	4e-05	0.00029	4e-05	3e-05	3e-05	4e-05	2e-05	0	0	0	0	0	0	2e-05	2e-05	2e-05	2e-05	0	9e-05	4e-05	0	0	0	0	0	0	0	0	0	2e-05	0.00012	0.00024	1e-05	4e-05	3e-05	0	0	0	0	0	0	0	0
1930014	Christensenellaceae bacterium Phil10	1e-05	2e-05	3e-05	0.00021	8e-05	1e-05	0.00011	4e-05	1e-05	2e-05	1e-05	9e-05	0	0	0	0	0	0	1e-05	2e-05	1e-05	0.00019	0	2e-05	1e-05	0	0	0	0	0	0	0	0	0	3e-05	9e-05	0.0001	0	9e-05	4e-05	0	0	0	0	0	0	0	0
626937	Christensenella minuta	3e-05	1e-05	2e-05	4e-05	6e-05	2e-05	0.00013	0.00027	2e-05	4e-05	1e-05	6e-05	0	0	0	0	0	0	0	1e-05	9e-05	0.00017	0	0.0005	1e-05	0	0	0	0	0	0	0	0	8e-05	3e-05	0.00022	4e-05	1e-05	0.00142	0.00031	0	0	0	0	0	0	0	0
1805714	Christensenella massiliensis	1e-05	2e-05	1e-05	3e-05	6e-05	1e-05	4e-05	8e-05	1e-05	2e-05	2e-05	1e-05	0	0	0	0	0	0	1e-05	2e-05	2e-05	1e-05	0	2e-05	2e-05	0	0	0	0	0	0	0	0	0	0.00024	2e-05	3e-05	0	7e-05	0.00023	0	0	0	2e-05	0.00018	0	0	0
1816678	Christensenella timonensis	0	0	1e-05	1e-05	2e-05	0	1e-05	3e-05	0	1e-05	2e-05	0	0	0	0	0	0	0	1e-05	0	0.00021	3e-05	0	1e-05	1e-05	3e-05	0	0	0	0	0	0	0	0	1e-05	1e-05	1e-05	0	1e-05	1e-05	0	0	7e-05	0	0.00141	0	4e-05	0
1851429	Christensenella sp. AF73-05CM02	0	0	0	2e-05	1e-05	0	2e-05	0.00012	1e-05	0	1e-05	1e-05	0	0	0	0	0	0	1e-05	0	0	2e-05	0	1e-05	1e-05	0	0	0	0	0	0	0	0	0	1e-05	2e-05	2e-05	0	3e-05	2e-05	0	0	0	0	0	0	0	0
1946247	Catabacter sp. UBA1685	1e-05	3e-05	3e-05	0.00013	0.00013	1e-05	0.00011	6e-05	2e-05	4e-05	1e-05	3e-05	0	0	0	0	0	0	4e-05	3e-05	4e-05	7e-05	0	4e-05	7e-05	0	0	0	0	0	0	0	0	1e-05	4e-05	0.00011	0.00012	1e-05	0.00011	5e-05	0	0	0	0	0	0	0	0
1946245	Catabacter sp. UBA1428	1e-05	1e-05	2e-05	5e-05	2e-05	1e-05	5e-05	1e-05	5e-05	1e-05	1e-05	1e-05	0	0	0	0	0	0	2e-05	1e-05	2e-05	4e-05	0	2e-05	2e-05	0	0	0	0	0	0	0	0	2e-05	1e-05	4e-05	5e-05	1e-05	9e-05	5e-05	0	0	0	0	0	0	0	0
1946267	Catabacter sp. UBA4263	1e-05	1e-05	2e-05	4e-05	4e-05	4e-05	4e-05	2e-05	5e-05	2e-05	6e-05	5e-05	0	0	0	0	0	0	5e-05	1e-05	2e-05	7e-05	0	3e-05	5e-05	0	0	0	0	0	0	0	0	0	1e-05	4e-05	5e-05	1e-05	2e-05	7e-05	0	0	0	0	0	0	0	0
1946256	Catabacter sp. UBA3700	1e-05	0	0	1e-05	0	0	0	0	0	0	1e-05	0	0	0	0	0	0	0	0	0	0	0	0	0	0	0	0	0	0	0	0	0	0	0	0	0	1e-05	0	0	0	0	0	0	0	0	0	0	0
1946252	Catabacter sp. UBA2862	1e-05	1e-05	3e-05	0.00013	4e-05	3e-05	0.0001	2e-05	2e-05	2e-05	2e-05	3e-05	0	0	0	0	0	0	4e-05	1e-05	3e-05	0.00016	0	2e-05	3e-05	0	0	0	0	0	0	0	0	0	3e-05	4e-05	0.00011	1e-05	8e-05	0.0004	0	0	0	0	0	0	0	0
1946292	Catabacter sp. UBA7102	1e-05	1e-05	3e-05	0.00014	6e-05	3e-05	0.00033	1e-05	2e-05	3e-05	5e-05	5e-05	0	0	0	0	0	0	8e-05	1e-05	6e-05	0.00013	0	3e-05	9e-05	0	0	0	0	0	0	0	0	3e-05	9e-05	4e-05	0.00015	1e-05	0.0002	0.0003	0	0	0	0	0	0	0	0
1946264	Catabacter sp. UBA3944	0	1e-05	0	2e-05	1e-05	1e-05	1e-05	0	0	0	1e-05	3e-05	0	0	0	0	0	0	1e-05	1e-05	1e-05	1e-05	0	1e-05	1e-05	0	0	0	0	0	0	0	0	0	1e-05	2e-05	2e-05	0	2e-05	1e-05	0	0	0	0	0	0	0	0
1946238	Catabacter sp. UBA1224	0	0	1e-05	2e-05	1e-05	1e-05	2e-05	0	0	0	1e-05	0	0	0	0	0	0	0	2e-05	0	1e-05	2e-05	0	1e-05	1e-05	0	0	0	0	0	0	0	0	0	1e-05	1e-05	2e-05	0	3e-05	3e-05	0	0	0	0	0	0	0	0
1946268	Catabacter sp. UBA4379	0	0	1e-05	5e-05	2e-05	1e-05	4e-05	1e-05	1e-05	1e-05	1e-05	5e-05	0	0	0	0	0	0	3e-05	1e-05	2e-05	8e-05	0	2e-05	4e-05	0	0	0	0	0	0	0	0	0	2e-05	2e-05	5e-05	0	3e-05	7e-05	0	0	0	0	0	0	0	0
1946244	Catabacter sp. UBA1385	0	0	1e-05	4e-05	2e-05	1e-05	5e-05	1e-05	0	1e-05	1e-05	1e-05	0	0	0	0	0	0	2e-05	0	1e-05	8e-05	0	1e-05	2e-05	0	0	0	0	0	0	0	0	0	2e-05	2e-05	4e-05	0	4e-05	7e-05	0	0	0	0	0	0	0	0
1946251	Catabacter sp. UBA2853	1e-05	1e-05	2e-05	5e-05	3e-05	2e-05	0.00011	2e-05	1e-05	1e-05	2e-05	2e-05	0	0	0	0	0	0	4e-05	1e-05	2e-05	7e-05	0	4e-05	3e-05	0	0	0	0	0	0	0	0	0	1e-05	3e-05	6e-05	0	3e-05	8e-05	0	0	0	0	0	0	0	0
1946250	Catabacter sp. UBA2843	0	0	1e-05	7e-05	3e-05	1e-05	9e-05	2e-05	1e-05	1e-05	1e-05	1e-05	0	0	0	0	0	0	3e-05	0	1e-05	5e-05	0	2e-05	3e-05	0	0	0	0	0	0	0	0	1e-05	2e-05	3e-05	8e-05	0	4e-05	4e-05	0	0	0	0	0	0	0	0
1946234	Catabacter sp. UBA1038	0	0	1e-05	2e-05	1e-05	1e-05	3e-05	1e-05	0	1e-05	1e-05	1e-05	0	0	0	0	0	0	2e-05	0	2e-05	6e-05	0	1e-05	2e-05	0	0	0	0	0	0	0	0	0	1e-05	1e-05	2e-05	0	4e-05	5e-05	0	0	0	0	0	0	0	0
1946300	Catabacter sp. UBA7703	0	0	0	2e-05	1e-05	0	3e-05	1e-05	0	0	0	1e-05	0	0	0	0	0	0	0	0	0	2e-05	0	1e-05	1e-05	0	0	0	0	0	0	0	0	0	0	2e-05	2e-05	0	4e-05	2e-05	0	0	0	0	0	0	0	0
1946282	Catabacter sp. UBA6094	0	0	0	0	0	0	0	0	0	0	0	0	0	0	0	0	0	0	0	0	0	0	0	0	0	0	0	0	0	0	0	0	0	0	0	0	0	0	0	0	0	0	0	0	0	0	0	0
1946278	Catabacter sp. UBA5394	0	0	1e-05	5e-05	2e-05	0	6e-05	1e-05	0	1e-05	1e-05	1e-05	0	0	0	0	0	0	2e-05	0	1e-05	5e-05	0	1e-05	2e-05	0	0	0	0	0	0	0	0	0	1e-05	4e-05	5e-05	0	4e-05	3e-05	0	0	0	0	0	0	0	0
1946248	Catabacter sp. UBA1750	0	0	1e-05	5e-05	2e-05	1e-05	9e-05	2e-05	1e-05	1e-05	1e-05	2e-05	0	0	0	0	0	0	1e-05	0	2e-05	5e-05	0	1e-05	2e-05	0	0	0	0	0	0	0	0	0	1e-05	2e-05	6e-05	0	6e-05	0.00012	0	0	0	0	0	0	0	0
1946249	Catabacter sp. UBA1782	0	0	0	0	0	0	0	0	0	0	0	0	0	0	0	0	0	0	0	0	0	0	0	0	0	0	0	0	0	0	0	0	0	0	0	0	0	0	0	0	0	0	0	0	0	0	0	0
1946246	Catabacter sp. UBA1431	0	0	0	1e-05	0	0	1e-05	0	0	0	0	1e-05	0	0	0	0	0	0	1e-05	0	0	1e-05	0	0	1e-05	0	0	0	0	0	0	0	0	0	0	1e-05	1e-05	0	0	1e-05	0	0	0	0	0	0	0	0
1946277	Catabacter sp. UBA5327	0	0	1e-05	2e-05	1e-05	0	3e-05	1e-05	0	0	0	1e-05	0	0	0	0	0	0	3e-05	0	1e-05	5e-05	0	1e-05	2e-05	0	0	0	0	0	0	0	0	0	1e-05	1e-05	2e-05	0	3e-05	4e-05	0	0	0	0	0	0	0	0
1946259	Catabacter sp. UBA3792	0	1e-05	1e-05	4e-05	2e-05	0	5e-05	1e-05	1e-05	1e-05	0	1e-05	0	0	0	0	0	0	1e-05	0	1e-05	4e-05	0	1e-05	1e-05	0	0	0	0	0	0	0	0	0	1e-05	3e-05	4e-05	0	3e-05	4e-05	0	0	0	0	0	0	0	0
1946265	Catabacter sp. UBA4246	0	0	1e-05	3e-05	1e-05	1e-05	3e-05	1e-05	1e-05	0	1e-05	1e-05	0	0	0	0	0	0	3e-05	0	1e-05	3e-05	0	1e-05	1e-05	0	0	0	0	0	0	0	0	0	1e-05	1e-05	4e-05	1e-05	2e-05	4e-05	0	0	0	0	0	0	0	0
1946281	Catabacter sp. UBA5893	0	0	0	1e-05	0	0	0	0	0	0	0	0	0	0	0	0	0	0	0	0	0	0	0	0	0	0	0	0	0	0	0	0	0	0	0	0	1e-05	0	0	0	0	0	0	0	0	0	0	0
1946279	Catabacter sp. UBA5399	0	0	0	1e-05	1e-05	0	1e-05	0	0	1e-05	0	0	0	0	0	0	0	0	1e-05	0	1e-05	1e-05	0	1e-05	1e-05	0	0	0	0	0	0	0	0	0	0	1e-05	1e-05	0	2e-05	1e-05	0	0	0	0	0	0	0	0
1946239	Catabacter sp. UBA1242	0	0	0	0	0	0	0	0	0	0	0	0	0	0	0	0	0	0	0	0	0	0	0	0	0	0	0	0	0	0	0	0	0	0	0	0	0	0	0	0	0	0	0	0	0	0	0	0
1946274	Catabacter sp. UBA4675	0	0	0	0	0	0	0	0	0	0	0	0	0	0	0	0	0	0	0	0	0	0	0	0	0	0	0	0	0	0	0	0	0	0	0	0	0	0	0	0	0	0	0	0	0	0	0	0
1946237	Catabacter sp. UBA1214	0	0	0	1e-05	1e-05	0	2e-05	1e-05	0	0	0	1e-05	0	0	0	0	0	0	1e-05	0	0	2e-05	0	1e-05	0	0	0	0	0	0	0	0	0	0	0	2e-05	1e-05	0	2e-05	2e-05	0	0	0	0	0	0	0	0
1946293	Catabacter sp. UBA7571	0	0	0	0	0	0	0	0	0	0	0	0	0	0	0	0	0	0	0	0	0	0	0	1e-05	0	0	0	0	0	0	0	0	0	0	0	0	1e-05	0	1e-05	0	0	0	0	0	0	0	0	0
1946269	Catabacter sp. UBA4626	0	0	0	0	0	0	0	0	0	0	0	0	0	0	0	0	0	0	0	0	0	0	0	0	0	0	0	0	0	0	0	0	2e-05	0	0	0	0	0	0	0	0	0	0	0	0	0	0	0
1946296	Catabacter sp. UBA7597	0	0	1e-05	3e-05	1e-05	0	1e-05	0	0	0	1e-05	0	0	0	0	0	0	0	0	0	1e-05	1e-05	0	0	0	0	0	0	0	0	0	0	0	0	0	4e-05	3e-05	0	0	1e-05	0	0	0	0	0	0	0	0
1946409	Desulfosporosinus sp. UBA4726	1e-05	1e-05	1e-05	4e-05	1e-05	2e-05	1e-05	0	1e-05	1e-05	1e-05	8e-05	0	0	0	0	0	0	1e-05	1e-05	2e-05	1e-05	0	1e-05	1e-05	0	0	0	0	0	0	0	0	1e-05	1e-05	3e-05	3e-05	1e-05	1e-05	0	0	0	0	0	0	0	0	0
1946412	Desulfosporosinus sp. UBA5188	1e-05	2e-05	1e-05	2e-05	1e-05	1e-05	1e-05	1e-05	1e-05	2e-05	1e-05	0.00011	0	0	0	0	0	0	1e-05	1e-05	3e-05	1e-05	0	2e-05	1e-05	0	0	0	0	0	0	0	0	1e-05	1e-05	3e-05	2e-05	1e-05	1e-05	0	0	0	0	0	0	0	0	0
1946410	Desulfosporosinus sp. UBA4745	0	0	0	1e-05	0	1e-05	0	0	0	0	0	4e-05	0	0	0	0	0	0	0	0	1e-05	1e-05	0	1e-05	1e-05	0	0	0	0	0	0	0	0	0	0	1e-05	1e-05	0	1e-05	0	0	0	0	0	0	0	0	0
1888891	Desulfosporosinus sp. OL	0	0	0	0	0	0	0	0	0	0	0	0	0	0	0	0	0	0	0	0	0	0	0	0	0	0	0	0	0	0	0	0	0	0	0	0	0	0	0	0	0	0	0	0	0	0	0	0
1969835	Desulfosporosinus sp. FKB	0	0	0	0	0	0	0	0	0	0	0	0	0	0	0	0	0	0	0	0	0	0	0	0	0	0	0	0	0	0	0	0	0	0	0	0	0	0	0	0	0	0	0	0	0	0	0	0
329936	Desulfosporosinus lacus	0	0	0	0	0	0	0	0	0	0	0	0	0	0	0	0	0	0	0	0	0	0	0	0	0	0	0	0	0	0	0	0	0	0	0	0	0	0	0	0	0	0	0	0	0	0	0	0
79209	Desulfosporosinus meridiei	0	0	0	0	0	0	0	0	0	0	0	0	0	0	0	0	0	0	0	0	0	0	0	0	0	0	0	0	0	0	0	0	0	0	0	0	0	0	0	0	0	0	0	0	0	0	0	0
476652	Desulfosporosinus acididurans	0	0	0	1e-05	0	0	0	0	0	0	0	0	0	0	0	0	0	0	0	0	0	0	0	0	0	0	0	0	0	0	0	0	0	0	0	0	1e-05	0	0	0	0	0	0	0	0	0	0	0
339862	Desulfosporosinus youngiae	0	0	0	0	0	0	0	0	0	0	0	0	0	0	0	0	0	0	0	0	0	0	0	0	0	0	0	0	0	0.00067	0	0	0	0	0	0	0	0	0	0	0	0	0	0	0.03743	0	0	0
1563	Desulfosporosinus orientis	0	0	0	0	0	0	0	0	0	0	0	0	0	0	0	0	0	0	0	0	0	0	0	0	0	0	0	0	0	0	0	0	0	0	0	0	0	0	0	0	0	0	0	0	0	0	0	0
1952706	Peptococcaceae bacterium UBA3933	0	0	0	1e-05	0	1e-05	0	0	0	0	0	1e-05	0	0	0	0	0	0	0	0	0	0	0	0	0	0	0	0	0	0	0	0	0	0	0	1e-05	0	0	0	0	0	0	0	0	0	0	0	0
1952723	Peptococcaceae bacterium UBA7185	0	1e-05	3e-05	3e-05	0.00012	1e-05	4e-05	1e-05	1e-05	2e-05	1e-05	0	0	0	0	0	0	0	0	1e-05	1e-05	1e-05	0	3e-05	7e-05	0	0	0	0	0	0	0	0	0	6e-05	0.0001	4e-05	0	1e-05	3e-05	0	0	0	0	0	0	0	0
999898	Peptococcaceae bacterium CEB3	0	0	0	0	0	0	0	0	0	0	0	1e-05	2e-05	2e-05	0	0	7e-05	3e-05	0	0	0	0	0	0	0	0.00027	2e-05	3e-05	0	0	2e-05	2e-05	2e-05	0	0	0	0	0	1e-05	0	0	4e-05	2e-05	5e-05	0.001	0	6e-05	2e-05
1952725	Peptococcaceae bacterium UBA7702	0	0	0	1e-05	1e-05	0	1e-05	1e-05	0	0	0	1e-05	0	0	0	0	0	0	0	0	0	2e-05	0	0	1e-05	0	0	0	0	0	0	0	0	0	0	1e-05	1e-05	0	1e-05	1e-05	0	0	0	0	0	0	0	0
1952707	Peptococcaceae bacterium UBA3937	0	0	0	0	0	0	0	0	0	0	0	1e-05	0	0	0	0	0	0	0	0	0	0	0	1e-05	0	0	0	0	0	0	0	0	0	0	0	0	0	0	0	0	0	0	0	0	0	0	0	0
1952719	Peptococcaceae bacterium UBA6116	0	0	0	0	0	0	0	0	0	0	0	0	0	0	0	0	0	0	0	0	0	0	0	0	0	0	0	0	0	0	0	0	0	0	0	0	0	0	0	0	0	0	0	0	0	0	0	0
1952716	Peptococcaceae bacterium UBA5757	0	0	0	0	0	0	0	0	0	0	0	0	0	0	0	0	0	0	0	0	0	0	0	0	0	0	0	0	0	0	0	0	0	0	0	0	0	0	0	0	0	0	0	0	0	0	0	0
1952722	Peptococcaceae bacterium UBA7144	0	0	2e-05	2e-05	0.00012	1e-05	1e-05	1e-05	0	3e-05	2e-05	1e-05	0	0	0	0	0	0	1e-05	1e-05	0	1e-05	0	1e-05	0	0	0	0	0	0	0	0	0	0	5e-05	4e-05	3e-05	0	0	1e-05	0	0	0	0	0	0	0	0
1952724	Peptococcaceae bacterium UBA7224	0	0	0	0	1e-05	0	0	0	0	0	0	0	0	0	0	0	0	0	0	0	0	0	0	0	0	0	0	0	0	0	0	0	0	0	1e-05	5e-05	0	0	1e-05	0	0	0	0	0	0	0	0	0
1629717	Peptococcaceae bacterium BRH_c4b	0	0	0	0	0	0	0	0	0	0	0	0	0	0	0	0	0	0	0	0	0	0	0	0	0	0	0	0	0	0	0	0	0	0	0	0	0	0	0	0	0	0	0	0	5e-05	0	0	0
1952705	Peptococcaceae bacterium UBA3330	0	0	0	0	1e-05	0	0	0	0	0	0	0	0	0	0	0	0	0	0	0	0	0	0	0	0	0	0	0	0	0	0	0	0	0	1e-05	4e-05	0	0	2e-05	0	0	0	0	0	0	0	0	0
1629715	Peptococcaceae bacterium BRH_c8a	0	0	0	1e-05	0	0	1e-05	0	0	0	0	0	0	0	0	0	0	0	0	0	0	1e-05	0	0	0	2e-05	0	0	0	0	0	0	0	0	0	1e-05	1e-05	0	1e-05	0	0	0	0	0	0	0	0	0
1952717	Peptococcaceae bacterium UBA5767	0	0	0	0	0	0	0	0	0	0	0	0	0	0	0	0	0	0	0	0	0	0	0	0	0	0	0	0	0	0	0	0	0	0	0	0	0	0	0	0	0	0	0	0	0	0	0	0
1531961	Peptococcaceae bacterium BICA1-7	0	0	0	0	0	0	0	0	0	0	0	0	0	0	0	0	0	0	1e-05	0	0	0	0	0	0	0	0	0	0	0	0	0	0	0	0	0	0	0	1e-05	0	0	0	0	0	0	0	0	0
1952715	Peptococcaceae bacterium UBA5755	0	0	0	0	0	0	0	0	0	0	0	0	0	0	0	0	0	0	0	0	0	0	0	0	0	0	0	0	0	0	0	0	0	0	0	0	0	0	0	0	0	0	0	0	0	0	0	0
51616	Desulfitobacterium chlororespirans	0	0	0	1e-05	0	0	0	0	0	0	0	0	0	0	0	0	0	0	0	0	0	0	0	0	0	0	0	0	0	0	0	0	0	0	0	0	0	0	1e-05	0	0	0	0	0	0	0	0	0
142877	Desulfitobacterium metallireducens	0	0	0	0	0	0	0	0	0	0	0	0	0	0	0	0	0	0	0	0	0	0	0	0	0	0	0	0	0	0	0	0	0	0	0	0	0	0	0	0	0	0	0	0	0	0	0	0
49338	Desulfitobacterium hafniense	0	0	0	1e-05	1e-05	0	1e-05	0	0	0	0	1e-05	0	0	0	0	0	0	1e-05	0	0	0	0	0	0	0	0	0	0	0	0	0	0	0	0	1e-05	1e-05	0	2e-05	1e-05	0	0	0	0	0	0	0	0
146907	Desulfitobacterium sp. PCE1	0	0	0	0	0	0	0	0	0	0	0	0	0	0	0	0	0	0	1e-05	0	1e-05	0	0	0	0	0	0	0	0	0	0	0	0	0	0	0	1e-05	0	1e-05	0	0	0	0	0	0	0	0	0
1565	Desulfotomaculum nigrificans	0	0	0	1e-05	0	0	0	0	0	0	0	0	0	0	0	0	0	0	0	0	0	0	0	0	0	0	0	0	0	0	0	0	0	0	0	0	1e-05	0	1e-05	0	0	0	0	0	0.0003	0	0.00013	0
1383067	Desulfotomaculum profundi	0	0	0	0	0	0	1e-05	0	0	0	0	0	0	0	0	0	0	0	0	0	0	0	0	1e-05	0	0	0	0	0	0	0	0	0	0	0	0	0	0	1e-05	0	0	0	0	0	0.00016	0	0.00015	0
1838280	Desulfotomaculum copahuensis	0	0	0	0	0	0	1e-05	0	0	0	0	1e-05	0	0	0	0	0	8e-05	2e-05	0	0	2e-05	0	0	1e-05	0	0	0	0	0	9e-05	4e-05	0	0	0	0	0	0	1e-05	0	0	0.00015	3e-05	0	0	3e-05	2e-05	0
83661	Desulfonispora thiosulfatigenes	0	0	0	0	0	0	0	0	0	0	0	0	0	0	0	0	0	0	0	0	0	0	0	0	0	0	0	0	0	0	0	0	0	0	0	0	1e-05	0	0	0	0	0	0	0	0	0	0	0
51515	Dehalobacterium formicoaceticum	0	0	0	0	1e-05	0	0	0	1e-05	0	0	0	0	0	2e-05	0	0	3e-05	1e-05	1e-05	1e-05	1e-05	0	0	1e-05	2e-05	0	0	0	0	2e-05	2e-05	0	0	1e-05	1e-05	0	0	1e-05	0	0	0	0	2e-05	0	0	0	2e-05
1285191	Desulfofarcimen intricatum	0	0	0	1e-05	1e-05	0	1e-05	1e-05	0	0	0	1e-05	2e-05	0.00109	6e-05	0.00406	0.00446	0.01279	2e-05	0	1e-05	2e-05	0	1e-05	1e-05	0.00272	0.02221	0.00984	5e-05	0.00443	0.07189	0.01931	0.00353	0	1e-05	0	1e-05	0	0	0	0.0001	0.01277	0.01921	0.00155	0.00064	0.0206	0.0276	0.01999
58138	Desulfofarcimen acetoxidans	0	0	0	1e-05	0	0	0	0	0	0	0	0	0	0	0	0	0	0	0	0	0	0	0	0	0	2e-05	0	0	0	0	0	0	0	0	0	1e-05	1e-05	0	1e-05	0	0	0	0	0	0	0	0	0
1947064	Pelotomaculum sp. UBA3102	0	0	0	0	0	0	0	0	0	0	0	0	0	0	0	0	0	0	0	0	0	0	0	0	0	0	0	0	0	0	0	0	0	0	0	0	0	0	0	0	0	0	0	0	0	0	0	0
1947065	Pelotomaculum sp. UBA3103	0	0	0	0	0	0	0	0	0	0	0	0	0	0	0	0	0	0	0	0	0	0	0	0	0	0	0	0	0	0	0	0	0	0	0	0	0	0	0	0	0	0	0	0	0	0	0	0
1947067	Pelotomaculum sp. UBA4789	0	0	0	0	0	0	0	0	0	0	0	0	0	0	0	0	0	0	0	0	0	0	0	0	0	0	0	0	0	0	0	0	0	0	0	0	0	0	0	0	0	0	0	0	0	0	0	0
1734395	Desulfitibacter sp. BRH_c19	0	0	0	0	0	0	0	0	0	0	0	0	0	0	0	0	0	0	0	0	0	0	0	0	0	0	0	0	0	0	0	0	0	0	0	0	0	0	0	0	0	0	0	0	0	0	0	0
55583	Dehalobacter restrictus	0	0	0	0	0	0	0	0	0	0	0	0	0	0	0	0	0	0	0	0	0	0	0	0	0	0.00011	0	3e-05	0	0	0	0	0	0	0	0	0	0	0	0	0	0	0	0	0.00166	3e-05	0	0
1147129	Dehalobacter sp. DCA	0	0	0	0	0	0	0	0	0	0	0	0	0	0	0	0	0	0	0	0	0	0	0	0	1e-05	0	0	0	0	0	0	0	0	0	0	1e-05	0	0	1e-05	0	0	0	0	0	0	0	0	0
341036	Desulfallas arcticus	0	0	0	0	0	0	0	0	0	0	0	0	0	0	0	0	0	0	0	0	0	0	0	0	0	0	0	0	0	0	0	0	0	0	0	0	0	0	1e-05	0	0	0	0	0	0	0	0	0
51197	Syntrophobotulus glycolicus	0	0	0	0	0	0	0	0	0	0	0	0	0	0	0	0	0	0	0	0	0	0	0	0	1e-05	0	0	0	0	0	0	0	0	0	0	0	0	0	0	0	0	0	0	0	0	0	0	0
1755312	Candidatus Dichloromethanomonas elyunquensis	0	0	0	0	0	0	0	0	0	0	0	0	0	0	0	0	0	0	0	0	0	0	0	0	0	0	0	0	0	0	0	0	0	0	0	0	0	0	0	0	0	0	0	0	0	0	0	0
471827	Candidatus Desulforudis audaxviator	0	0	0	0	0	0	0	0	0	0	0	0	0	0	0	0	0	0	0	0	0	0	0	0	0	0	0	0	0	0	0	0	0	0	0	0	0	0	0	0	0	0	0	0	0	0	0	0
1946779	Mageeibacillus sp. UBA1193	0	0	0	0	0	1e-05	0	0	0	0	0	0	0	0	0	0	0	0	0	0	0	0	0	0	0	0	0	0	0	0	0	0	0	0	0	0	1e-05	0	0	0	0	0	0	0	0	0	0	0
1946793	Mageeibacillus sp. UBA5436	0	0	0	0	0	0	0	0	0	0	0	0	0	0	0	0	0	0	0	0	0	0	0	0	0	0	0	0	0	0	0	0	0	0	0	0	0	0	0	0	0	0	0	0	0	0	0	0
1946783	Mageeibacillus sp. UBA1257	0	0	0	1e-05	0	0	0	0	0	0	0	0	0	0	0	0	0	0	0	0	0	0	0	0	0	0	0	0	0	0	0	0	0	0	0	0	1e-05	0	1e-05	0	0	0	0	0	0	0	0	0
1946784	Mageeibacillus sp. UBA3660	0	0	0	1e-05	0	0	0	0	0	0	0	0	0	0	0	0	0	0	1e-05	0	0	1e-05	0	1e-05	0	0	0	0	0	0	0	0	0	0	0	0	1e-05	0	0	0	0	0	0	0	0	0	0	0
884684	Mageeibacillus indolicus	0	0	0	1e-05	2e-05	0	2e-05	0	1e-05	1e-05	0	2e-05	0	4e-05	2e-05	2e-05	0	0	1e-05	0	1e-05	2e-05	0	2e-05	1e-05	0	2e-05	3e-05	0	0	0	2e-05	5e-05	0	1e-05	2e-05	1e-05	0	0	1e-05	0	0.00011	2e-05	5e-05	0.00053	7e-05	8e-05	2e-05
1946787	Mageeibacillus sp. UBA4314	0	0	0	0	0	0	0	0	0	0	0	1e-05	0	0	0	0	0	0	1e-05	0	1e-05	1e-05	0	0	0	0	0	0	0	0	0	0	0	0	0	0	0	0	1e-05	0	0	0	0	0	0	0	0	0
1946785	Mageeibacillus sp. UBA3708	0	0	0	1e-05	0	0	0	0	0	0	0	1e-05	0	0	0	0	0	0	0	0	0	1e-05	0	1e-05	0	0	0	0	0	0	0	0	0	0	0	0	1e-05	0	0	0	0	0	0	0	0	0	0	0
1946796	Mageeibacillus sp. UBA5442	0	0	0	0	0	0	1e-05	0	0	0	0	0	0	0	0	0	0	0	0	0	0	0	0	0	0	0	0	0	0	0	0	0	0	0	0	0	0	0	0	0	0	0	0	0	0	0	0	0
1946797	Mageeibacillus sp. UBA5734	0	0	0	1e-05	1e-05	0	1e-05	0	0	0	0	1e-05	0	4e-05	2e-05	2e-05	0	8e-05	0	0	0	1e-05	0	0	0	0.00016	0.0001	0.00018	5e-05	0	0	8e-05	0.0001	0	0	1e-05	1e-05	0	2e-05	1e-05	0	7e-05	3e-05	3e-05	3e-05	7e-05	0.0002	4e-05
1946798	Mageeibacillus sp. UBA5747	0	0	0	0	0	0	1e-05	0	0	0	0	0	0	0	0	0	0	0	0	0	0	0	0	0	0	0	0	0	0	0	0	0	0	0	0	0	0	0	0	1e-05	0	0	0	0	0	0	0	0
1946799	Mageeibacillus sp. UBA5770	0	0	0	0	0	1e-05	1e-05	0	0	0	1e-05	0	0	0	0	0	0	0	0	0	0	1e-05	0	0	0	0	0	0	0	0	0	0	0	0	0	0	0	0	0	0	0	0	0	0	0	0	0	0
1946786	Mageeibacillus sp. UBA3781	0	0	0	1e-05	0	0	1e-05	0	0	0	0	0	0	0	0	0	0	0	1e-05	0	0	1e-05	0	0	0	0	0	0	0	0	0	0	0	0	0	0	1e-05	0	0	0	0	0	0	0	0	0	0	0
1946781	Mageeibacillus sp. UBA1243	0	0	0	1e-05	0	0	1e-05	0	0	0	0	0	0	0	0	0	0	0	0	0	0	0	0	1e-05	0	0	0	0	0	0	0	0	0	0	0	0	1e-05	0	1e-05	0	0	0	0	0	0	0	0	0
1946780	Mageeibacillus sp. UBA1212	0	0	1e-05	2e-05	1e-05	0	2e-05	0	0	0	0	1e-05	0	0	0	0	0	0	0	0	0	3e-05	0	0	0	0	0	0	0	0	0	0	0	0	0	1e-05	1e-05	0	2e-05	2e-05	0	0	0	0	0	0	0	0
1947402	Hungateiclostridiaceae bacterium UBA3934	1e-05	1e-05	1e-05	3e-05	1e-05	1e-05	1e-05	0	1e-05	1e-05	2e-05	6e-05	0	0	0	0	0	0	1e-05	2e-05	1e-05	1e-05	0	1e-05	2e-05	0	0	0	0	0	0	0	0	1e-05	1e-05	2e-05	3e-05	1e-05	1e-05	1e-05	0	0	0	0	0	0	0	0
1947400	Hungateiclostridiaceae bacterium UBA3577	0	0	0	0	0	0	0	0	0	0	0	0	0	0	0	0	0	0	0	0	0	0	0	0	0	0	0	0	0	0	0	0	0	0	0	0	0	0	1e-05	0	0	0	0	0	0	0	0	0
1947401	Hungateiclostridiaceae bacterium UBA3922	1e-05	2e-05	2e-05	0.0001	2e-05	3e-05	3e-05	0	2e-05	2e-05	3e-05	0.00022	0	0	0	0	0	0	1e-05	3e-05	3e-05	3e-05	0	3e-05	7e-05	0	0	0	0	0	0	0	0	2e-05	1e-05	6e-05	7e-05	2e-05	3e-05	2e-05	0	0	0	0	0	0	0	0
288965	Hungateiclostridium clariflavum	0	0	1e-05	1e-05	1e-05	0	1e-05	1e-05	0	0	1e-05	1e-05	3e-05	7e-05	7e-05	0	0.00015	3e-05	0	0	0	0	0	0	0	0.00012	0.00014	0.00014	8e-05	0.00011	0.0001	0.00013	0.00039	1e-05	0	1e-05	1e-05	0	1e-05	0	0	4e-05	0.00015	0.00016	0.00015	0.0001	9e-05	0.00011
253314	Hungateiclostridium straminisolvens	0	0	0	0	0	0	0	0	0	0	0	0	0	0	0	0	0	0	0	0	0	0	0	0	0	0	0	0	0	0	0	0	0	0	0	0	0	0	0	0	0	0	0	0	0	0	0	0
35830	Hungateiclostridium cellulolyticum	0	0	0	2e-05	0	0	0	0	0	0	0	1e-05	0	0	0	0	0	0	0	0	0	0	0	0	0	2e-05	0	0	0	0	0	0	0	0	0	1e-05	2e-05	0	1e-05	0	0	0	0	2e-05	0	0	0	0
1515	Hungateiclostridium thermocellum	0	0	0	0	0	0	0	0	0	0	0	0	0	0	0	0	0	0	0	0	0	0	0	0	0	0	0	0	0	0	0	0	0	0	0	1e-05	0	0	1e-05	0	0	0	0	0	0	0	0	0
29355	Ruminiclostridium cellobioparum	0	0	0	1e-05	0	0	1e-05	1e-05	0	0	1e-05	0	0	2e-05	0	0	0	3e-05	1e-05	0	1e-05	1e-05	0	1e-05	0	0	0	0	0	0	4e-05	0	0	0	0	0	1e-05	0	1e-05	0	0	0	0	0	0	3e-05	0	0
29362	Ruminiclostridium papyrosolvens	0	0	0	3e-05	0	0	0	0	0	0	0	0	0	0	0	0	0	0	0	0	0	1e-05	0	0	0	0	0	0	0	0	0	0	0	0	0	1e-05	3e-05	0	0	0	0	0	0	0	0	0	0	0
1792311	Petroclostridium xylanilyticum	0	0	1e-05	2e-05	1e-05	1e-05	1e-05	1e-05	1e-05	1e-05	1e-05	1e-05	0.00015	0.00027	0.00016	0.00018	0.00022	0.00036	1e-05	0	1e-05	1e-05	0	1e-05	0	0.00012	0.00078	0.00031	0.00137	9e-05	0.00023	0.00039	0.00032	0	1e-05	1e-05	2e-05	0	1e-05	0	0.00115	0.00037	0.00011	0.00022	0.00014	0.00012	0.0004	0.00036
35825	Pseudobacteroides cellulosolvens	0	0	0	1e-05	0	0	0	0	0	0	0	0	2e-05	0	0	0	4e-05	0	0	0	0	0	0	0	0	0.00012	3e-05	0	0	0	0	0	0	0	0	1e-05	1e-05	0	0	0	0	0	1e-05	0	0.00043	0	2e-05	2e-05
172733	uncultured Clostridiales bacterium	1e-05	1e-05	2e-05	8e-05	5e-05	1e-05	9e-05	4e-05	2e-05	1e-05	1e-05	2e-05	0	0	0	0	0	0	6e-05	1e-05	3e-05	6e-05	0	3e-05	3e-05	0	0	0	0	0	0	0	0	1e-05	3e-05	4e-05	8e-05	1e-05	0.00015	6e-05	0	0	0	0	0	0	0	0
1947640	Syntrophomonas sp. UBA5432	0	0	0	0	0	0	0	0	0	0	0	0	0	0	0	0	0	0	0	0	0	0	0	0	0	0	0	0	0	0	0	0	0	0	0	0	0	0	0	0	0	0	0	0	0	0	0	0
1947615	Syntrophomonas sp. UBA1368	0	0	0	0	0	0	0	0	0	0	0	0	0	0	0	0	0	0	0	0	0	0	0	0	0	0	0	0	0	0	0	0	0	0	0	0	0	0	0	0	0	0	0	0	0	0	0	0
1947618	Syntrophomonas sp. UBA4807	0	0	0	0	0	0	0	0	0	0	0	0	0	0	0	0	0	0	0	0	0	0	0	0	0	0	0	0	0	0	0	0	0	0	0	0	0	0	0	0	0	0	0	0	0	0	0	0
1947625	Syntrophomonas sp. UBA4911	0	0	0	0	0	0	0	0	0	0	0	0	0	0	0	0	0	0	0	0	0	0	0	0	0	0	0	3e-05	0	0	0	0	0	0	0	0	0	0	0	0	0	0	0	0	0	0	0	0
1947633	Syntrophomonas sp. UBA5314	0	0	0	0	0	0	0	0	0	0	0	0	0	0	0	0	0	0	0	0	0	0	0	0	0	0	0	0	0	0	0	0	0	0	0	0	0	0	0	0	0	0	0	0	0	0	0	0
863	Syntrophomonas wolfei	0	0	0	0	0	0	0	0	0	0	0	1e-05	0	0	0	0	0	0	0	0	0	0	0	0	1e-05	0	0	0	0	0	0	0	0	0	0	0	0	0	1e-05	0	0	0	0	0	0	0	0	0
1671631	Syntrophothermus sp. DTU052	0	0	0	0	0	0	0	0	0	0	0	0	0	2e-05	0	0	4e-05	0	0	0	0	0	0	0	1e-05	0	0	0	5e-05	0	0	3e-05	3e-05	0	0	0	0	0	1e-05	0	0	0	1e-05	0	0.00017	0	0	0
86170	Syntrophothermus lipocalidus	0	0	0	0	0	0	0	0	0	0	0	0	0	0	0	0	0	0	0	0	0	0	0	0	0	0	0	0	0	0	0	0	0	0	0	0	0	0	1e-05	0	0	0	0	0	0	0	0	0
54294	Thermosyntropha lipolytica	0	0	0	0	0	0	0	0	0	0	0	0	0	0	0	0	0	0	0	0	0	0	0	0	0	2e-05	0	0	0	0	0	0	0	0	0	0	0	0	0	0	0	0	0	0	0	0	0	0
1637507	Heliobacterium sp. N15.MGS-306	3e-05	4e-05	6e-05	9e-05	4e-05	0.00013	0.00013	4e-05	0.00011	0.0001	0.0001	6e-05	0.05672	0.04276	0.04101	0.06362	0.10561	0.01358	0.00013	4e-05	6e-05	3e-05	0	8e-05	0.00014	0.03524	0.01626	0.01092	0.165	0.06788	0.01531	0.02109	0.08343	2e-05	6e-05	5e-05	4e-05	2e-05	0.00084	2e-05	0.18842	0.05345	0.0143	0.03591	0.01849	0.02205	0.05059	0.00481
1734398	Gracilibacter sp. BRH_c7a	0	0	0	0	0	0	0	0	0	0	0	0	0	0	0	0	0	0	0	0	0	0	0	1e-05	0	0	0	0	0	0	0	0	0	0	0	0	0	0	0	0	0	0	0	0	0	0	0	0
1473580	Defluviitalea phaphyphila	0	0	0	3e-05	0	0	0	0	0	0	0	0	0	0.00028	0	0	4e-05	3e-05	0	0	0	0	0	0	0	2e-05	3e-05	3e-05	0.00019	8e-05	0	0	9e-05	0	1e-05	1e-05	2e-05	0	0	0	0.00039	4e-05	1e-05	0	0.00024	0	0.00012	0.00015
182411	Anaerobranca californiensis	0	0	0	0	0	0	0	0	0	0	0	0	0	0	0	0	0	0	0	0	0	0	0	0	0	0	0	0	0	0	0	0	0	0	0	0	1e-05	0	0	0	0	0	0	0	0	0	0	0
2734	Symbiobacterium thermophilum	0	0	0	1e-05	1e-05	0	1e-05	0	0	0	0	1e-05	0.00012	0.00015	8e-05	9e-05	4e-05	0.00013	1e-05	0	1e-05	1e-05	0	0	1e-05	5e-05	7e-05	0.00021	0.00029	4e-05	7e-05	0	9e-05	0	0	0	1e-05	0	1e-05	1e-05	0.00019	0.00011	4e-05	9e-05	5e-05	0.0001	0.00012	0.00019
1697788	Clostridia bacterium UC5.1-2H6	0.00014	0.00012	1e-05	1e-05	4e-05	1e-05	0	7e-05	7e-05	1e-05	2e-05	1e-05	0	0	0	0	0	0	1e-05	0.00011	2e-05	1e-05	0	1e-05	6e-05	0	0	0	0	0	0	0	0	1e-05	1e-05	0.00011	1e-05	4e-05	0.00029	1e-05	0	0	0	0	0	0	0	0
1697794	Clostridia bacterium UC5.1-1D1	4e-05	3e-05	6e-05	4e-05	0.00011	0.00011	0.00013	0.00069	0.00051	0.00012	7e-05	0.00013	0	5e-05	0	0	0	0	0.00077	3e-05	0.00033	0.00022	0	0.00019	0.00047	0	0	0	0	0	0	0	0	0.00231	0.00036	9e-05	5e-05	0.0002	0.00022	0.00023	0	0	0	0	0	0	0	0
1697781	Clostridia bacterium UC5.1-2E3	4e-05	4e-05	5e-05	7e-05	6e-05	6e-05	6e-05	4e-05	8e-05	0.00021	8e-05	4e-05	2e-05	0	0	0.00013	8e-05	0.00021	4e-05	5e-05	0.00036	0.00014	0	4e-05	0.00019	7e-05	0.0002	0	0	7e-05	0	0.00023	0.00013	1e-05	0.00015	0.00013	7e-05	3e-05	0.00035	4e-05	0	8e-05	0	0	2e-05	4e-05	0	0
1697787	Clostridia bacterium UC5.1-1D10	2e-05	2e-05	1e-05	1e-05	3e-05	2e-05	3e-05	4e-05	7e-05	0.00028	3e-05	0.00023	0	0	0	0	0	0	2e-05	4e-05	6e-05	0.00034	0	2e-05	0.00015	0	0	0	0	0	0	0	0	0.00129	0.0006	0.0001	1e-05	4e-05	0.00013	1e-05	0	0	0	0	0	0	0	0
1697793	Clostridia bacterium UC5.1-1E11	1e-05	1e-05	4e-05	2e-05	7e-05	5e-05	3e-05	8e-05	4e-05	5e-05	5e-05	6e-05	0	0	0	0	0	0	4e-05	2e-05	4e-05	7e-05	0	6e-05	0.00014	0	0	0	0	0	0	0	0	2e-05	0.00015	5e-05	2e-05	1e-05	9e-05	2e-05	0	0	0	0	0	0	0	0
1697780	Clostridia bacterium UC5.1-1D2	1e-05	1e-05	1e-05	4e-05	1e-05	1e-05	1e-05	1e-05	1e-05	1e-05	1e-05	0	0	0	0	0	0	0	0	1e-05	1e-05	1e-05	0	1e-05	2e-05	0	0	0	0	0	0	0	0	0	1e-05	2e-05	3e-05	0	2e-05	1e-05	0	0	0	0	0	0	0	0
1697792	Clostridia bacterium UC5.1-2F7	3e-05	2e-05	1e-05	0.00014	0.00025	1e-05	5e-05	0.00017	4e-05	4e-05	1e-05	8e-05	0	0	0	0	0	0.00117	2e-05	5e-05	0.00015	0.00013	0	0.00015	8e-05	0.00112	0	0	0.0002	0	0	0	0.00127	0	0.00018	5e-05	0.00026	0	2e-05	2e-05	0.00042	0.00169	0	0.0005	0.00072	0	0.00259	0
1697790	Clostridia bacterium UC5.1-1C12	1e-05	1e-05	0	1e-05	0	0	0	0	0	0	0	0	0	0	0	0	0	0	0	0	1e-05	0	0	0	0	0	0	0	0	0	0	0	0	0	0	0	1e-05	0	0	0	0	0	0	0	0	0	0	0
1676162	Clostridia bacterium DTU080	0	0	0	1e-05	0	0	1e-05	0	0	0	0	2e-05	0	0	0	0	0	0	0	0	0	0	0	0	0	0	0	0	0	0	0	0	0	0	0	1e-05	1e-05	0	0	0	0	0	0	0	0	0	0	0
1734399	Clostridia bacterium BRH_c25	0	0	0	1e-05	0	0	0	0	0	0	0	1e-05	0	0	0	0	0	0	0	0	1e-05	1e-05	0	0	1e-05	0	0	0	0	0	0	0	0	0	1e-05	0	1e-05	0	0	0	0	0	0	0	0	0	0	0
1671639	Clostridia bacterium DTU025	0	0	0	0	0	0	0	0	0	0	0	0	0	0	0	0	0	0	0	0	0	0	0	0	0	0	0	0	0	0	0	0	0	0	0	0	0	0	1e-05	0	0	0	0	0	0	0	0	0
1671641	Clostridia bacterium DTU065	0	0	0	0	0	0	0	0	0	0	0	0	0	0	0	0	0	0	0	0	0	0	0	0	0	0	0	0	0	0	0	0	0	0	0	0	0	0	0	0	0	0	0	0	0	0	0	0
46354	Thermoanaerobacter wiegelii	0	0	0	0	0	0	0	0	0	0	0	0	0	0	0	0	0	3e-05	0	0	0	0	0	1e-05	0	0	0	0	0	0	0	0	0	0	0	0	0	0	0	0	0	0	0	0	0	0	4e-05	2e-05
2325	Thermoanaerobacter kivui	0	0	0	0	0	0	0	0	0	0	0	0	0	0	0	0	0	0	0	0	0	0	0	0	0	0	0	0	0	0	0	0	0	0	0	0	0	0	0	0	0	0	0	0	0	0	0	0
54265	Carboxydothermus ferrireducens	0	0	0	0	0	0	0	0	0	0	0	0	0	0	0	0	0	0	0	0	0	0	0	0	0	0	0	0	0	0	0	0	0	0	0	0	0	0	0	0	0	0	0	0	0	0	0	0
44256	Caldanaerobius polysaccharolyticus	0	0	0	0	0	0	0	0	0	0	0	0	0	0	0	0	0.00153	0.00045	0	0	0	0	0	0	0	0.00147	0	0.002	0	4e-05	4e-05	2e-05	0.00016	0	0	0	0	0	0	0	0	0.00015	2e-05	0.00063	0.01916	0.00017	0.00258	8e-05
456330	Caldanaerobius fijiensis	0	0	0	0	0	0	0	0	0	0	1e-05	0	0	0	0	0	0	0	0	0	0	0	0	0	0	0	0	0	0	0	0	0	0	0	0	0	0	0	0	0	0	0	0	0	0	0	0	0
1525	Moorella thermoacetica	0	0	0	0	0	0	0	0	0	0	0	0	0	0	0	0	0	8e-05	0	0	0	0	0	0	0	0	0	0	0	0	0.00024	0	0	0	0	0	0	0	1e-05	0	0	0	0	0	0.0001	0	0	0
224999	Tepidanaerobacter syntrophicus	0	0	0	0	0	0	0	0	0	0	0	0	0	0	0	0	0	0	0	0	0	0	0	0	0	0	0	0	0	0	0	0	0	0	0	0	0	0	0	0	0	0	0	0	0	0	0	0
1918496	Tepidanaerobacter sp. EBM-38	0	0	0	0	0	0	0	0	0	0	0	0	0	0	0	0	0	0	0	0	0	0	0	0	0	0	0	0	0	0	0	0	0	0	0	0	0	0	0	0	0	0	0	0	0	0	0	0
1517	Thermoanaerobacterium thermosaccharolyticum	0	0	0	1e-05	0	0	0	0	0	0	0	0	0	0	0	0	0	0	0	0	0	0	0	0	0	0	0	0	0	0	0	0	0	0	0	0	1e-05	0	0	0	0	0	0	0	0	0	0	0
29329	Thermoanaerobacterium xylanolyticum	0	0	0	0	0	0	0	0	0	0	0	0	0	0	0	0	0	0	0	0	0	0	0	0	0	0	0	0	0	0	0	0	0	0	0	0	0	0	0	0	0	0	0	0	0	0	0	0
1930849	Thermoanaerobacterium sp. PSU-2	0	0	0	0	0	0	0	0	0	0	0	0	0	0	0	0	0	0	0	0	0	0	0	0	0	0	0	0	0	0	0	0	0	0	0	0	0	0	0	0	0	0	0	0	0	0	0	0
29324	Caldicellulosiruptor naganoensis	0	0	0	0	0	0	0	0	0	0	0	0	0	0	0	0	0	0	0	0	0	0	0	0	0	0	0	0	0	0	0	0	0	0	0	0	0	0	0	0	0	0	0	3e-05	0	0	0	0
52765	Caldicellulosiruptor kristjanssonii	0	0	0	0	0	0	0	0	0	0	0	0	0	0	0	0	0	0	0	0	0	0	0	0	0	0	0	0	0	0	0	0	0	0	0	1e-05	0	0	0	0	0	0	0	0	0	0	0	0
413888	Caldicellulosiruptor hydrothermalis	0	0	0	0	0	0	0	0	0	0	0	0	0	0	0	0	0	0	0	0	0	0	0	0	0	0	0	0	0	0	0	0	0	0	0	0	0	0	0	0	0	0	0	0	0	0	0	0
291990	Thermosediminibacter oceani	0	0	0	0	0	0	0	0	0	0	0	0	0	0	0	0	0	3e-05	0	0	0	0	0	0	0	0	0	0	0	0	0	0	0	0	0	0	0	0	0	0	0	0	0	0	0	0	0	0
1951293	Thermoanaerobacterales bacterium UBA4877	0	0	0	0	0	0	0	0	0	0	0	0	0	0	0	0	0	0	0	0	0	0	0	0	0	0	0	0	0	0	0	0	0	0	0	0	0	0	0	0	0	0	0	0	0	0	0	0
56779	Halanaerobium kushneri	0	0	0	0	0	0	0	0	0	0	0	0	0	0	0	0	0	0	0	0	0	0	0	0	0	0	0	0	0	0	0	0	0	0	0	0	0	0	0	0	0	0	0	0	0	0	0	0
54121	Halanaerobium congolense	0	0	0	0	0	0	0	0	0	0	0	0	0	0	0	0	0	0	0	0	0	0	0	0	0	0	0	0	0	0	0	0	0	0	0	0	0	0	0	0	0	0	0	0	0	0	0	0
29563	Halanaerobium salsuginis	0	0	0	0	0	0	0	0	0	0	0	0	0	0	0	0	0	0	0	0	0	0	0	0	0	0	0	0	0	0	0	0	0	0	0	0	0	0	0	0	0	0	0	0	0	0	0	0
1671624	Halothermothrix sp. DTU029	0	0	0	1e-05	0	0	0	0	0	0	0	1e-05	0	0	0	0	0	0	0	0	0	0	0	0	0	0	0	0	0	0	0	0	0	0	0	0	1e-05	0	0	0	0	0	2e-05	0	0	0	0	0
42422	Halobacteroides halobius	0	0	0	0	0	0	0	0	0	0	0	0	0	0	0	0	0	0	0	0	0	0	0	0	0	0	0	0	0	0	0	0	0	0	0	0	0	0	0	0	0	0	0	0	0	0	0	0
1413210	Orenia metallireducens	0	0	0	0	0	0	0	0	0	0	0	0	0	0	0	0	0	0	0	0	0	0	0	0	0	0	0	3e-05	0	0	0	0	0	0	0	0	0	0	0	0	0	0	0	0	8e-05	3e-05	4e-05	0
142842	Selenihalanaerobacter shriftii	0	0	0	0	0	0	0	0	0	0	0	0	0	0	0	0	0	0	0	0	0	0	0	0	0	0	0	0	0	0	0	0	0	0	0	0	0	0	0	0	0	0	0	0	0	0	0	0
244328	uncultured Clostridia bacterium	0	0	0	1e-05	0	0	0	0	0	0	0	1e-05	0	0	0	0	0	0	0	0	0	0	0	0	0	0	0	0	0	0	0	0	0	0	0	0	1e-05	0	0	0	0	0	0	0	0	0	0	0
1262767	Catenibacterium sp. CAG:290	0.02595	0.00444	0	0.00242	0	0	0.0016	0	0	0	0	0.00098	0	0	0	5e-05	0.0008	9e-05	0	0.00806	0	0.00563	0	0.0035	0	9e-05	3e-05	0.0001	0	0	0	0	0	0	1e-05	0	0.0018	0	0	0.00124	0	0	0	0	0	0.00106	0	0
100886	Catenibacterium mitsuokai	0.01752	0.00303	5e-05	0.01132	7e-05	4e-05	0.00126	2e-05	4e-05	0.00033	3e-05	0.0027	9e-05	0.00057	4e-05	0.09055	0.17658	0.10376	1e-05	0.00542	0	0.01709	0	0.00218	5e-05	0.12495	0.00046	0.1545	0	0.00037	0	0.0024	0.00207	2e-05	2e-05	2e-05	0.00836	1e-05	2e-05	0.00455	0.00044	0.00017	9e-05	5e-05	7e-05	0.06413	0.00031	0
1946520	Faecalitalea sp. UBA637	0.02725	0.021	0	0.00174	0.00992	0	0.0016	0	0	0.00802	0	0	0	0	0	0	0	0	0	0.00663	0	0	0	0.00052	0	0	0	0	0	0	0	0	0	0	0	0	0.00391	0	0	0.00718	0	0	0	2e-05	0	0	0	0
39483	Faecalitalea cylindroides	5e-05	4e-05	0.00016	2e-05	3e-05	0.00058	2e-05	1e-05	2e-05	7e-05	0.00035	1e-05	0	0	0	0	0	0	1e-05	2e-05	3e-05	1e-05	0	1e-05	7e-05	0	0	0	0	0.00098	0	0	0	2e-05	0	2e-05	2e-05	2e-05	2e-05	3e-05	0.0058	0.00391	0	0.00019	0	0	0	0
1946517	Faecalitalea sp. UBA4312	1e-05	1e-05	0	1e-05	0	0	0	0	0	0	0	0	0	0	0	0	0	0	0	0	0	0	0	0	0	0	0	0	0	0	0	0	0	0	0	0	1e-05	0	1e-05	1e-05	0	0	0	0	0	0	0	0
1735	Holdemanella biformis	0.01365	0.0108	3e-05	0.00532	0.00535	5e-05	0.00303	6e-05	4e-05	0.00598	6e-05	7e-05	3e-05	0	0	0.02434	0.01558	4e-05	3e-05	0.00358	8e-05	0.00022	0.02135	0.00045	5e-05	0.03183	0	3e-05	0.0044	0.0012	7e-05	0.00208	9e-05	2e-05	3e-05	1e-05	0.01479	3e-05	1e-05	0.01558	0	7e-05	0.00011	0.03789	0.01868	0.0064	0.0279	0.00027
450746	Coprobacillus sp. 8_1_38FAA	0.00074	5e-05	6e-05	0.00028	0.0001	0.00015	3e-05	0.00021	0.00012	1e-05	0.0004	3e-05	0	0	0	0	0	0	4e-05	6e-05	0.00017	7e-05	0	3e-05	2e-05	0	0	0	0	0	0	0	0	0.00012	2e-05	0.00017	0.00022	5e-05	0.00126	2e-05	0	0	0.00031	0	0	0	0	0
100884	Coprobacillus cateniformis	0.00024	0.00011	6e-05	0.00011	7e-05	5e-05	4e-05	9e-05	0.0001	7e-05	6e-05	4e-05	0.01049	0.0015	0.00629	0	4e-05	9e-05	7e-05	0.00016	7e-05	0.00011	0	6e-05	6e-05	0	0.00616	0	0.0045	0	0.00192	0	0	4e-05	4e-05	0.0002	0.00014	9e-05	5e-05	5e-05	0	0	0.00529	3e-05	0.00108	0	0.00727	0
469597	Coprobacillus sp. 8_2_54BFAA	8e-05	7e-05	8e-05	0.00012	0.00041	9e-05	2e-05	0.00018	0.0002	5e-05	0.00018	2e-05	0	0	0	0	0	0	6e-05	9e-05	0.00012	4e-05	0	0.00022	0.0002	0	0	0	0	0	0	0	0	5e-05	0.00012	0.00018	0.00012	0.0001	0.00045	3e-05	0	0	0	0	0	0	0	0
1262855	Coprobacillus sp. CAG:605	0	0	0	0.00048	0	0	0	0	0	0	0	0	0	0	0	0	0	0	0	0	0	0	0	0	0	0	0	0	0	0	0	0	0	0	0	7e-05	0.00108	0	0	0	0	0	0	0	0	0	0	0
341225	[Clostridium] saccharogumia	0.00055	0.00092	1e-05	1e-05	4e-05	2e-05	0	2e-05	0.00011	0	1e-05	3e-05	0	0.0002	0	0	0	0	2e-05	0.00079	2e-05	3e-05	0	4e-05	0.00013	0	3e-05	0	0.00029	0	0	8e-05	0	5e-05	0.0002	2e-05	1e-05	0.00011	5e-05	2e-05	0	4e-05	2e-05	0	0	0	0	0
1965571	Erysipelatoclostridium sp. An173	9e-05	4e-05	1e-05	1e-05	2e-05	1e-05	1e-05	5e-05	2e-05	1e-05	1e-05	1e-05	0	0.001	2e-05	0	0	0	1e-05	4e-05	9e-05	3e-05	0	1e-05	6e-05	0	0	0	0.00896	0	0	0.00023	0	0	0	3e-05	1e-05	1e-05	4e-05	0.00011	0	0	9e-05	0	0	0	0	0
1522	[Clostridium] innocuum	6e-05	0.00017	6e-05	5e-05	9e-05	0.0001	0.00021	0.00033	0.00016	0.00013	6e-05	7e-05	0	0	0	0	0	0	4e-05	9e-05	0.00041	5e-05	0	0.00086	0.0003	0	0	0	0	0	0	0	0	0.00012	0.00011	0.00038	5e-05	6e-05	0.00122	6e-05	0	0	0	0	0	0	0	0
29348	[Clostridium] spiroforme	2e-05	1e-05	4e-05	1e-05	6e-05	4e-05	1e-05	3e-05	0.00051	4e-05	8e-05	2e-05	0.00198	0.0025	0.00645	0	7e-05	0	0.00013	1e-05	5e-05	4e-05	0	8e-05	0.00034	0	0.00163	0	0.00498	0.00013	0	0.00317	0.0035	0.00012	5e-05	0.00055	1e-05	0.00039	3e-05	1e-05	0	0.00232	0.00033	0	0	0.0004	0	0
69824	[Clostridium] cocleatum	1e-05	1e-05	0	1e-05	0	0	0	0	0	0	1e-05	0	0	0	0	0	0	0	0	1e-05	0	2e-05	0	0	0	3e-05	0	0	0.00022	0	0	0	2e-05	1e-05	0	1e-05	1e-05	0	0	1e-05	0	0	1e-05	0	0	0	0	0
1768196	Erysipelotrichaceae bacterium MTC7	7e-05	0.00011	1e-05	1e-05	2e-05	1e-05	1e-05	2e-05	2e-05	1e-05	1e-05	0	0	0	0	0	0	0	0	0.0001	3e-05	0	0	0.00014	2e-05	0	0	0	0	0	0	0	0	3e-05	1e-05	1e-05	1e-05	1e-05	1e-05	1e-05	0	0	0	0	0	0	0	0
658659	Erysipelotrichaceae bacterium 3_1_53	6e-05	0.00013	3e-05	2e-05	3e-05	4e-05	5e-05	8e-05	5e-05	6e-05	4e-05	1e-05	0	0	0	0	0	0	1e-05	0.00013	0.00167	4e-05	0	6e-05	9e-05	0	0	0	0	0	0	0	0	8e-05	7e-05	3e-05	2e-05	3e-05	0.0001	7e-05	0	0	0	0	0	0	0	0
1951745	Erysipelotrichaceae bacterium UBA3379	4e-05	1e-05	0	1e-05	0	0	0	0	0	0	0	0	0	0	0	0	0	0	0	1e-05	0	1e-05	0	0	0	0	0	0	0	0	0	0	0	0	0	0	1e-05	0	0	0	0	0	0	0	0	0	0	0
1834207	Erysipelotrichaceae bacterium I46	4e-05	2e-05	2e-05	1e-05	3e-05	4e-05	2e-05	0.00041	0.00018	2e-05	3e-05	1e-05	0	0	0	0	0	0	4e-05	2e-05	0.00036	2e-05	0	0.00012	0.00018	0	0	0	0	0	0	0	0	0.00032	0.00019	0.00034	1e-05	0.00013	0.00127	2e-05	0	0	0	0	0	0	0	0
1951742	Erysipelotrichaceae bacterium UBA1783	0	0	0	0	0	0	0	0	0	0	0	0	0	0	0	0	0	0	0	0	0	0	0	0	0	0	0	0	0	0	0	0	0	0	0	0	1e-05	0	0	0	0	0	0	0	0	0	0	0
877415	Erysipelotrichaceae bacterium NK3D112	0	0	0	1e-05	0	0	1e-05	0	0	0	0	0	0	8e-05	6e-05	2e-05	0	0	0	0	1e-05	1e-05	0	1e-05	0	0.0004	2e-05	0	0	0	0	2e-05	0	0	0	0	1e-05	0	0	2e-05	0	0	7e-05	2e-05	0.0001	0	0	2e-05
1574263	Candidatus Stoquefichus sp. KLE1796	8e-05	5e-05	1e-05	1e-05	2e-05	0	0	1e-05	2e-05	3e-05	1e-05	0	0	0	0	0	0	0.00027	1e-05	2e-05	1e-05	1e-05	0	1e-05	0.00012	0	0.00053	0	0	0	0	0.00016	0.00017	3e-05	2e-05	1e-05	1e-05	1e-05	0.00012	2e-05	0	0	0	0	0	0	0	0
1658109	Candidatus Stoquefichus sp. SB1	1e-05	0	1e-05	1e-05	1e-05	2e-05	1e-05	5e-05	1e-05	0	4e-05	0	0	0	0	0	0	0	0	0	0.00027	1e-05	0	3e-05	0	0	0	0	0	0	0	0	0	1e-05	0	2e-05	1e-05	0	0	0	0	0	0	0	0	0	0	0
1470350	Candidatus Stoquefichus massiliensis	1e-05	0	0	1e-05	0	0	0	1e-05	0	0	0	0	0	0	0	0	0	0	0	0	1e-05	0	0	0	2e-05	0	0	0	0	0	0	0	0	0	0	0	1e-05	0	0	0	0	0	0	0	0	0	0	0
1630	Kandleria vitulina	9e-05	2e-05	0	0.00017	0	0	3e-05	0	0	1e-05	0	0.00012	0	6e-05	0	0	0	0	1e-05	3e-05	0	0.00059	0	4e-05	0	0	3e-05	0	0.00031	0	0	3e-05	2e-05	0	0	0	0.00012	0	0	0.00032	0.00023	4e-05	0	0	0	0	2e-05	0
1946669	Kandleria sp. UBA4329	1e-05	1e-05	1e-05	1e-05	1e-05	1e-05	1e-05	0	1e-05	0	1e-05	0	0	0	0	0	0	0	0	1e-05	0	0	0	0	0	0	0	0	0	0	0	0	0	0	0	1e-05	1e-05	0	0	0	0	0	0	0	0	0	0	0
102148	Solobacterium moorei	8e-05	9e-05	1e-05	2e-05	5e-05	2e-05	4e-05	7e-05	1e-05	3e-05	4e-05	1e-05	0	0	0	0	0.00036	0	0	4e-05	2e-05	2e-05	0	4e-05	3e-05	0	0	0	0	0	0	0.00047	0	4e-05	1e-05	3e-05	3e-05	0	9e-05	4e-05	0.00016	0	0	0	0.00012	0	0.00029	0
1947462	Solobacterium sp. UBA2881	0	0	0	1e-05	0	0	0	0	0	0	0	0	0	0	0	0	0	0	0	0	0	0	0	0	0	0	0	0	0	0	0	0	0	0	0	0	1e-05	0	0	1e-05	0	0	0	0	0	0	0	0
1947465	Solobacterium sp. UBA3691	0	0	0	1e-05	0	0	1e-05	0	0	0	0	0	0	0	0	0	0	0	0	0	0	0	0	0	0	0	0	0	0	0	0	0	0	0	0	0	0	0	0	0	0	0	0	0	0	0	0	0
1947460	Solobacterium sp. UBA2823	0	1e-05	0	1e-05	0	0	1e-05	0	0	0	0	0	0	0	0	0	0	0	1e-05	0	1e-05	0	0	0	1e-05	0	0	0	0	0	0	0	0	0	0	0	1e-05	0	1e-05	0	0	0	0	0	0	0	0	0
1947464	Solobacterium sp. UBA3303	0	0	0	1e-05	0	0	0	0	0	0	0	0	0	0	0	0	0	0	0	0	0	0	0	0	0	0	0	0	0	0	0	0	0	0	0	0	1e-05	0	0	0	0	0	0	0	0	0	0	0
1947468	Solobacterium sp. UBA7737	0	0	0	1e-05	0	0	0	0	0	0	0	0	0	0	0	0	0	0	0	0	0	0	0	0	0	0	0	0	0	0	0	0	0	0	0	0	1e-05	0	0	1e-05	0	0	0	0	0	0	0	0
1947458	Solobacterium sp. UBA1789	0	0	0	0	0	0	0	0	0	0	0	0	0	0	0	0	0	0	0	0	0	0	0	0	0	0	0	0	0	0	0	0	0	0	0	0	0	0	0	0	0	0	0	0	0	0	0	0
1947467	Solobacterium sp. UBA636	0	0	0	0	0	0	0	1e-05	0	0	0	0	0	0	0	0	0	0	0	0	0	0	0	0	0	0	0	0	0	0	0	0	0	0	0	0	0	0	0	0	0	0	0	0	0	0	0	0
1947466	Solobacterium sp. UBA5398	0	0	0	0	0	0	0	0	0	0	0	1e-05	0	0	0	0	0	0	1e-05	0	1e-05	2e-05	0	0	1e-05	0	0	0	0	0	0	0	0	0	1e-05	0	0	0	0	1e-05	0	0	0	0	0	0	0	0
31971	Absiella dolichum	0.00018	0.00018	3e-05	4e-05	0.00011	9e-05	8e-05	6e-05	6e-05	0.00015	0.00016	4e-05	0	0	0	0	0	0	1e-05	0.00013	0.00065	7e-05	0	0.00013	0.00104	0	0	0	0	0	0	0	0	0.00014	6e-05	7e-05	7e-05	2e-05	0.00014	4e-05	0	0	0	0	0	0	0	0
1871030	Merdibacter massiliensis	7e-05	5e-05	3e-05	2e-05	5e-05	4e-05	4e-05	1e-05	2e-05	0.00011	4e-05	1e-05	0.00011	0.0003	7e-05	0	7e-05	5e-05	2e-05	2e-05	0.00025	2e-05	0	3e-05	0.00013	2e-05	8e-05	3e-05	0.00087	0	3e-05	4e-05	2e-05	1e-05	8e-05	3e-05	3e-05	1e-05	0.00017	2e-05	0.00012	0.0002	2e-05	0	3e-05	0	0	0.00015
1468449	Holdemania massiliensis	3e-05	8e-05	7e-05	4e-05	4e-05	8e-05	5e-05	2e-05	4e-05	3e-05	6e-05	1e-05	0	0	0	0	0	0	2e-05	5e-05	2e-05	2e-05	0	2e-05	0	0	0	0	0	0	0	0	0	0	2e-05	0.00024	6e-05	0	3e-05	1e-05	0	0	9e-05	3e-05	0	0	0	0
61171	Holdemania filiformis	2e-05	3e-05	2e-05	5e-05	0.00033	2e-05	0.00031	0.00067	8e-05	0.00043	2e-05	0.00027	0	0	0	0	0	0	5e-05	3e-05	6e-05	0.00056	0	0.00028	0.0004	0	0	0	0	0	0	0	0	0.00039	7e-05	0.00031	8e-05	2e-05	3e-05	0.00018	0	0	0	0	0	0	0	0
1852366	Holdemania sp. Marseille-P2844	0	1e-05	1e-05	2e-05	3e-05	1e-05	6e-05	0.00011	0.00061	8e-05	1e-05	1e-05	0	0	0	0	0	0	0.00038	1e-05	2e-05	4e-05	0	3e-05	3e-05	0	0	0	0	0	0	0	0	7e-05	0.00043	5e-05	2e-05	0.00011	1e-05	3e-05	0	0	0	0	0	0	0	0
1776392	Massiliomicrobiota timonensis	2e-05	1e-05	1e-05	2e-05	1e-05	0	0	1e-05	2e-05	0	1e-05	0	3e-05	0	0.00021	0	0	0	1e-05	1e-05	6e-05	0	0	1e-05	0.00024	0	0	0	0	0	0	0	0	0.0001	1e-05	2e-05	1e-05	1e-05	2e-05	0	0	0	0.00042	0	0	0	0	0
1965557	Massiliomicrobiota sp. An134	2e-05	1e-05	2e-05	0	0	0	0	1e-05	3e-05	0	1e-05	0	6e-05	0.00238	5e-05	0	0	0	1e-05	1e-05	4e-05	2e-05	0	1e-05	0	2e-05	3e-05	0	0.0071	0	7e-05	0.00017	0.00123	0	0	2e-05	1e-05	0	4e-05	0	0	0.00058	6e-05	3e-05	0.00249	0	4e-05	0.00024
1903263	Traorella massiliensis	2e-05	2e-05	1e-05	7e-05	3e-05	1e-05	3e-05	8e-05	6e-05	6e-05	2e-05	8e-05	0	0	0	0	0	0	4e-05	2e-05	3e-05	0.0001	0	6e-05	0.00019	0	0	0	0	0	0	0	0	0	2e-05	5e-05	7e-05	4e-05	9e-05	4e-05	0	0	0	0	0.0002	0	0	8e-05
174709	Allobaculum stercoricanis	2e-05	2e-05	0	1e-05	1e-05	0	0	0	0	1e-05	0	0	0	0	0	0	0	0	0	1e-05	0	0	0	1e-05	0	0	3e-05	0	0	0	0	0	0	0	0	0	1e-05	0	0	1e-05	0	0	0	0	0	0	0	0
1323	Faecalicoccus pleomorphus	2e-05	2e-05	1e-05	1e-05	2e-05	1e-05	4e-05	1e-05	1e-05	1e-05	1e-05	1e-05	0	0	0	0	0	0.00015	1e-05	1e-05	1e-05	1e-05	0	1e-05	1e-05	0	0	0.00018	0	0	0	0	0.00253	1e-05	1e-05	1e-05	1e-05	0	1e-05	1e-05	0	0	0	0	0.01257	0	0	0
31973	Eggerthia catenaformis	1e-05	0	0	1e-05	0	0	0	0	0	0	0	1e-05	0	7e-05	0	5e-05	0	5e-05	0	0	0	0	0	0	0	0	3e-05	0	0.00107	0	0	0.0001	0	0	0	1e-05	1e-05	0	0	0	0.0001	8e-05	0	0	2e-05	0	9e-05	0.0001
118748	Bulleidia extructa	1e-05	0	1e-05	0	0	0	0	0	0	0	0	0	0	0	0	0	0	0	0	0	0	0	0	0	0	0	0	0	0	0	0	0	0	0	0	0	0	0	0	1e-05	0	0	0	0	0	0	0.00033	0
1648	Erysipelothrix rhusiopathiae	0	0	0	1e-05	0	0	0	0	0	0	0	0	0	0	0	0	0	0	0	0	0	0	0	0	0	0	0	0	0	0	0	0	0	0	0	0	1e-05	0	0	0	0	0	0	0	0	0	0	0
1946467	Erysipelothrix sp. UBA3377	0	0	0	0	0	0	0	0	0	0	0	0	0	0	0	0	0	0	0	0	0	0	0	0	0	0	0	0	0	0	0	0	0	0	0	0	0	0	0	0	0	0	0	0	0	0	0	0
1514105	Erysipelothrix larvae	0	0	0	0	0	0	0	0	0	0	0	0	0	0.00068	0	0	0	5e-05	0	0	0	0	0	0	0	0	0	0	0.00052	0	5e-05	0.00012	4e-05	0	0	0	0	0	0	0	8e-05	0	4e-05	2e-05	3e-05	3e-05	0	0
1946468	Erysipelothrix sp. UBA3383	0	0	0	0	0	0	0	0	0	0	0	0	0	0	0	0	0	0	0	0	0	0	0	0	0	0	0	0	0	0	0	0	0	0	0	0	0	0	0	0	0	0	0	0	0	0	0	0
154288	Turicibacter sanguinis	0	0.00012	4e-05	2e-05	8e-05	2e-05	4e-05	1e-05	1e-05	6e-05	4e-05	1e-05	0.00036	4e-05	0.00197	0.00033	0.00085	0.00106	0	5e-05	2e-05	0	0	6e-05	0	0.0066	0.00039	0.00045	0.00116	0.0035	0.11495	0	0.00142	1e-05	0	8e-05	1e-05	2e-05	5e-05	1e-05	0.01176	0.00592	0.00017	0.0054	0.00501	0.00344	0.00092	0
1947764	Turicibacter sp. UBA7094	0	0	0	0	0	0	0	0	0	0	0	0	0	0	0	0	0	0	0	0	0	0	0	0	0	0	0	0	0	0	0	0	0	0	0	0	0	0	0	0	0	0	0	0	0	0	0	0
1862672	Dubosiella newyorkensis	0	0	0	0	0	0	0	0	0	0	0	0	0	0	0	0	0	0	0	0	0	0	0	0	0	0	0	0	0	0	0	0	0	0	0	0	0	0	0	0	0	0	0	0	0	0	0	0
1702221	Faecalibaculum rodentium	0	0	0	1e-05	1e-05	1e-05	1e-05	0	1e-05	1e-05	1e-05	1e-05	5e-05	0.00514	5e-05	0	0	0	1e-05	0	1e-05	1e-05	0	1e-05	1e-05	0	0.00016	0	0	7e-05	0.00011	0.00064	0.0002	0	1e-05	1e-05	1e-05	0	1e-05	1e-05	0	0.00017	0.00023	0.00018	2e-05	4e-05	2e-05	0.0003
1034346	Dielma fastidiosa	0	0	0	0	1e-05	0	0	0	0	0	0	1e-05	0	0	0	0	0	0	0	0	3e-05	0	0	1e-05	1e-05	0	0	0	0	2e-05	0	0.00045	2e-05	1e-05	0	0	1e-05	0	2e-05	0	0	0	0	0	0	0	0	2e-05
1262914	Phascolarctobacterium sp. CAG:207	0.01065	0.0153	0.00339	1e-05	0.02866	0.00061	1e-05	0.02006	0	3e-05	0.0004	0	0	0	0	0	0	0	0	0.0065	0	0	0	8e-05	0.00085	0	0	0	0	0	0	0	0	0	0	0.01543	1e-05	0	1e-05	0.00043	0	0	0	0	0	0	0	0
1262915	Phascolarctobacterium sp. CAG:266	0	1e-05	0	0	2e-05	0	0	2e-05	0	0	0	1e-05	0	0	0	0	0	0	1e-05	1e-05	0	1e-05	0	0	0	0	0	0	0	0	0	0	0	0	0	1e-05	0	0	0.00506	1e-05	0	0	0	0	0	0	0	0
626940	Phascolarctobacterium succinatutens	0	1e-05	2e-05	4e-05	2e-05	1e-05	0.00214	2e-05	0.00184	0.00677	2e-05	2e-05	9e-05	0	0	2e-05	0.00015	0	0.00162	1e-05	2e-05	4e-05	0	2e-05	2e-05	0.00054	0	0	0	0	0	0	0.00068	0	0.00012	1e-05	4e-05	0.00024	3e-05	1e-05	0	0	0	0.00081	0.00376	0	0	0
905	Acidaminococcus fermentans	1e-05	1e-05	1e-05	3e-05	2e-05	3e-05	2e-05	3e-05	1e-05	1e-05	3e-05	3e-05	0	0	0	0	0	0	2e-05	1e-05	1e-05	3e-05	0	2e-05	5e-05	0	0	0	0	0	0	0	0	1e-05	3e-05	1e-05	4e-05	1e-05	1e-05	1e-05	0	0	0	0	0	0	0	0
1262687	Acidaminococcus sp. CAG:542	0	0	0	1e-05	0	0	1e-05	0	0	0	0	0	0	0	0	0	0	0	0	0	0	1e-05	0	0	0	0	0	0	0	0	0	0	0	0	0	0	1e-05	0	0	1e-05	0	0	0	0	0	0	0	0
1262688	Acidaminococcus sp. CAG:917	0	0	0	0	0	0	0	0	0	0	0	0	0	0	0	0	0	0	0	0	0	0	0	0	0	0	0	0	0	0	0	0	0	0	0	0	1e-05	0	0	0	0	0	0	0	0	0	0	0
1871002	Acidaminococcus timonensis	0	0	0	1e-05	0	0	1e-05	0	0	1e-05	0	0	0	0	0	0	0	0	0	0	0	1e-05	0	0	1e-05	0	0	0	0	5e-05	0	3e-05	0	2e-05	0	1e-05	1e-05	0	1e-05	1e-05	0	0	0	2e-05	2e-05	0	3e-05	0
187327	Acidaminococcus intestini	0	0	1e-05	1e-05	5e-05	1e-05	0.00026	1e-05	1e-05	0.0051	1e-05	1e-05	0	0	0	0	0	0	1e-05	0	1e-05	1e-05	0	1e-05	1e-05	0	0	0	0	0	0	0	0	0	2e-05	0	1e-05	0	1e-05	1e-05	0	0	0	0.00017	0	3e-05	0	0
1852375	Acidaminococcus massiliensis	0	0	1e-05	1e-05	1e-05	0	1e-05	0	0	1e-05	0	0	0	0	0	0	0	0	0	0	0	1e-05	0	0	0	0	0	0	0	0	0	0	0	0	0	0	1e-05	0	1e-05	1e-05	0	0	0	0	0	0	0	0
40841	Succiniclasticum ruminis	0	0	0	1e-05	1e-05	0	1e-05	1e-05	0	0	0	1e-05	0	0	0	0	0	0	0	0	1e-05	4e-05	0	1e-05	0	0	0	0	0	0	0	0	0	0	1e-05	1e-05	1e-05	0	1e-05	1e-05	0	0	0	0	0	0	0	0
1951334	Acidaminococcaceae bacterium UBA2453	0	0	0	0	0	0	1e-05	0	0	0	0	0	0	0	0	0	0	0	0	0	0	1e-05	0	0	0	0	0	0	0	0	0	0	0	0	0	0	0	0	1e-05	1e-05	0	0	0	0	0	0	0	0
1951338	Acidaminococcaceae bacterium UBA7746	0	0	0	1e-05	1e-05	0	1e-05	0	0	1e-05	0	1e-05	0	0	0	0	0	0	0	0	0	3e-05	0	0	0	0	0	0	0	0	0	0	0	0	0	1e-05	1e-05	0	2e-05	1e-05	0	0	0	0	0	0	0	0
29466	Veillonella parvula	0.00177	0.00049	1e-05	3e-05	0	2e-05	3e-05	0	1e-05	1e-05	0.00028	0	0	0	0	0	0	0	0	0.00032	1e-05	0	0	1e-05	1e-05	0	0	0	0	0	0	0	0	0	0	7e-05	4e-05	0	0	0	0	0	0	0	0	0	0	0
39778	Veillonella dispar	0.0013	0.00216	1e-05	4e-05	2e-05	1e-05	7e-05	1e-05	1e-05	1e-05	3e-05	0	0	0	0	0	0	0	0	0.00187	0	0	0	1e-05	1e-05	0	0	0	0	0	0	0	0	1e-05	0	3e-05	4e-05	0	0	0	0	0	0	0	0	0	0	0
1203593	Veillonella sp. HPA0037	0.00109	0.00067	0	1e-05	0	0	2e-05	0	0	0	1e-05	0	0	0	0	0	0	0	0	0.00052	0	0	0	0	0	0	0	0	0	0	0	0	0	0	0	0	0	0	0	0	0	0	0	0	0	0	0	0
39777	Veillonella atypica	0.00093	0.00054	0	0	0	0	2e-05	0	0	0	0	0	0	0	0	0	0	0	0	0.00043	0	0	0	0	0	0	0	0	0	0	0	0	0	0	0	0	0	0	0	0	0	0	0	0	0	0	0	0
1110546	Veillonella tobetsuensis	0.00021	0.00014	0	1e-05	0	0	2e-05	0	0	0	1e-05	0	0	0	0	0	0	0	0	0.00011	0	0	0	0	0	0	0	0	0	0	0	0	0	0	0	0	1e-05	0	0	0	0	0	0	0	0	0	0	0
1262980	Veillonella sp. CAG:933	0.00018	0.00026	4e-05	3e-05	2e-05	8e-05	6e-05	0.00013	4e-05	3e-05	8e-05	2e-05	0	0	0	0	0	0	1e-05	0.00015	2e-05	3e-05	0	5e-05	3e-05	0	0	0	0	0	0	0	0	0	0	3e-05	2e-05	1e-05	0	1e-05	0	0	0	0	0	0	0	0
671228	Veillonella sp. oral taxon 158	0.00015	0.00044	1e-05	2e-05	0	2e-05	4e-05	0	1e-05	1e-05	4e-05	0	0	0	0	0	0	0	1e-05	0.00024	0	0	0	2e-05	0	0	0	0	0	0	0	0	0	0	0	1e-05	2e-05	0	0	1e-05	0	0	0	0	0	0	0	0
423477	Veillonella rogosae	0.00011	0.00039	0	2e-05	0	1e-05	4e-05	0	0	0	3e-05	0	0	0	0	0	0	0	0	0.00023	0	0	0	1e-05	0	0	0	0	0	0	0	0	0	0	0	1e-05	1e-05	0	0	0	0	0	0	0	0	0	0	0
248315	Veillonella rodentium	2e-05	1e-05	0	0	0	0	0	0	0	0	0	0	0	0	0	0	0	0	0	1e-05	0	0	0	0	0	0	0	0	0	0	0	0	0	0	0	0	0	0	0	0	0	0	0	0	0	0	0	0
936589	Veillonella sp. AS16	2e-05	1e-05	0	0	0	0	0	0	0	0	0	0	0	0	0	0	0	0	0	1e-05	0	0	0	0	0	0	0	0	0	0	0	0	0	0	0	0	0	0	0	0	0	0	0	0	0	0	0	0
419208	Veillonella denticariosi	2e-05	1e-05	0	0	0	0	0	0	0	0	0	0	0	0	0	0	0	0	0	1e-05	0	0	0	0	0	0	0	0	0	0	0	0	0	0	0	0	0	0	0	0	0	0	0	0	0	0	0	0
187328	Veillonella montpellierensis	1e-05	1e-05	0	0	0	0	0	0	0	0	0	0	2e-05	0.00011	0	0	7e-05	5e-05	0	0	0	0	0	0	0	0	0.0001	0	0.0001	8e-05	0	0.00013	0.00037	0	0	0	0	0	0	0	0	0	6e-05	3e-05	0.00011	0	0.00014	0
671229	Veillonella sp. oral taxon 780	0	0	0	0	0	0	0	0	0	0	0	0	0	0	0	0	0	0	0	0	0	0	0	0	0	0	0	0	0	0	0	0	0	0	0	0	0	0	0	0	0	0	0	0	0	0	0	0
1502943	Veillonella seminalis	0	0	1e-05	0	0	0	0	0	0	1e-05	0	0	0	0	0	0	0	0	0	0	0	0	0	1e-05	0	0	0	0	0	0	0	0	0	0	0	0	0	0	0	0	0	0	0	0	0	0	0	0
1263072	Dialister invisus CAG:218	0.00015	0.00936	0	2e-05	0.0008	0	0	0	0	0	0	0	0	0	0	0	0	0	0	0.00153	0.00265	0	0	0	1e-05	0	0	0	0	0	0	0	0	0.00102	4e-05	0	2e-05	0	1e-05	0.0007	0	0	0	0	0	0	0	0
1262871	Dialister sp. CAG:588	2e-05	1e-05	0	0	3e-05	0	0	0	0	0	0	0	0	0	0	0	0	0	0	5e-05	0	0	0	0	0	0	0	0	0	0	0	0	0	0	0	0	0	0	0	0	0	0	0	0	0	0	0	0
1262869	Dialister sp. CAG:357	0	0	0.00967	9e-05	0	0.00341	4e-05	0.00351	0	0	0.00287	0.002	0	0	0	0	0	0	0	0	1e-05	0.00023	0	0.01278	0	0	0	0	0	0	0	0	0	0	1e-05	0	0.00011	0	0	0	0	0	0	0	0	0.00019	0	0
1262870	Dialister sp. CAG:486	0	0	1e-05	0.03505	2e-05	1e-05	0.01863	1e-05	0	1e-05	1e-05	1e-05	0	0	0	0	0	0	0	0	0	2e-05	0.06384	2e-05	1e-05	0	0	0	0	0	0	0	0	0	0	0	0.04139	0	0	0	0	0	0	0	0	0	0	0
218538	Dialister invisus	7e-05	0.00211	1e-05	5e-05	0.00082	0	3e-05	0	0	0	0	0	0	0.00317	0	0.00062	0	0.00066	0	0.00044	0.00357	0	0	2e-05	2e-05	0	0.00402	0	0	0	0	0.00169	0	0.00109	3e-05	0	6e-05	0	0	0.00074	0	0.00236	0	0	0	0	0.00101	0
487173	Dialister succinatiphilus	0	0	8e-05	0.00053	0	3e-05	0.00023	4e-05	0	0	2e-05	3e-05	0	0	0	0	0	0	0	0	1e-05	1e-05	0	0.00011	0	0	0	0	0	0	0	0	0	0	0	0	0.00061	0	0	1e-05	0	0	0	0	0	0	0	0
1946417	Dialister sp. UBA6422	0	0	0	6e-05	0	0	3e-05	0	0	0	0	0	4e-05	0	4e-05	9e-05	0	8e-05	0	0	0	0	0	0	0	0.00459	0.00015	3e-05	5e-05	0.00112	0.00013	2e-05	5e-05	0	0	0	8e-05	0	0	0	0	0.00019	7e-05	3e-05	0	0.00175	2e-05	8e-05
1946420	Dialister sp. UBA734	0	0	1e-05	0.00011	1e-05	1e-05	5e-05	1e-05	0	0	0	0	0	0	0	0	0	0	0	0	0	0	0	2e-05	1e-05	0	0	0	0	0	0	0	0	0	0	0	0.00014	0	0	0	0	0	0	0	0	0	0	0
187326	Megasphaera micronuciformis	2e-05	7e-05	0	0	0	0	0	0	0	0	0	0	0	0	0	0	0	0	0	1e-05	0	0	0	0	0	0	0	0	0	0	0	0	0	0	0	0	0	0	0	0	0	0	0	0	0	0	0	0
1603888	Megasphaera sp. MJR8396C	1e-05	1e-05	2e-05	0	2e-05	2e-05	1e-05	0	0	4e-05	5e-05	0	0	0	0	0	0	0	0	1e-05	4e-05	1e-05	0	0	3e-05	0	0	0	0	0	0	0	0	1e-05	0.0001	0	0	0	2e-05	0.00011	0	0	0	0	0	0	0	0
907	Megasphaera elsdenii	0	0	0	1e-05	0	1e-05	1e-05	0	1e-05	0.00049	1e-05	1e-05	0	0	0	0	0	0	0	0	0	1e-05	0	0	0	0	0	0	0	0	0	0	0	1e-05	0	0	1e-05	1e-05	1e-05	0.00484	0	0	0	0	0	0	0	0
1111454	Megasphaera sp. BV3C16-1	0	0	0	1e-05	0	1e-05	0	0	0	0	1e-05	0	0	0	0	0	0	0	0	0	0	0	0	0	0	0	0	0	0	0	0	0	0	0	0	0	0	0	0	1e-05	0	0	0	0	0	0	0	0
1000569	Megasphaera sp. UPII 135-E	0	0	1e-05	1e-05	1e-05	1e-05	8e-05	0	0	0	1e-05	0.00017	0	0	0	0	0	0	0	0	0	4e-05	0	1e-05	1e-05	0	0	0	0	0	0	0	0	0	1e-05	2e-05	1e-05	0	1e-05	1e-05	0	0	0	0	0	0	0	0
1946843	Megasphaera sp. UBA1696	0	0	0	0	0	0	0	0	0	1e-05	0	0	0	0	0	0	0	0	0	0	0	0	0	0	0	0	0	0	0	0	0	0	0	0	0	0	0	0	0	6e-05	0	0	0	0	0	0	0	0
537288	Megasphaera sp. DJF_B143	0	0	0	0	0	0	0	0	0	0	0	0	0	0	0	0	0	0	0	0	0	0	0	1e-05	0	0	0	0	0	0	0	0	0	0	0	0	0	0	0	1e-05	0	0	0	0	0	0	0	0
1965622	Megasphaera sp. An286	0	0	0	1e-05	1e-05	0	1e-05	1e-05	0	5e-05	0	1e-05	2e-05	0	0	0	0	0	1e-05	0	1e-05	2e-05	0	1e-05	1e-05	0	2e-05	0	0	0	0	0	0	0	1e-05	1e-05	1e-05	0	0.00012	6e-05	0	0	0	2e-05	0.00012	0	2e-05	0
1806837	Massilibacillus massiliensis	1e-05	0	0	0	0	0	0	0	0	0	0	0	0	0	0	0	0	0	0	0	0	0	0	0	0	0	0	0	0	0	0	0	0	0	0	0	0	0	0	1e-05	0	0	0	0	0	0	0	0
1588754	Veillonellaceae bacterium DNF00626	0	0	1e-05	3e-05	0	0	2e-05	0	0	0	0	0	0	0	0	0	0	0	0	0	0	0	0	1e-05	0	0.00024	0	0	0	0	0	0	0	0	0	0	4e-05	0	0	0	0	0	0	0	0	0	0	0
1953090	Veillonellaceae bacterium UBA5809	0	0	0	0	0	0	0	0	0	0	0	0	0	0	0	0	0	0	0	0	0	0	0	1e-05	0	0	0	0	0	0	0	0	0	0	0	0	0	0	0	0	0	0	0	0	0	0	0	0
620903	Negativicoccus succinicivorans	0	1e-05	0	0	0	0	0	0	0	0	0	0	0	0	0	0	0	0	0	1e-05	0	0	0	0	0	0	0	0	0	0	0	0	0	0	0	0	0	0	0	0	0	0	0	0	0	0	0	0
1702287	Negativicoccus massiliensis	0	0	0	1e-05	0	0	0	0	0	0	0	0	0	0	0	0	0	0	0	0	0	0	0	0	0	0	0	0	0	0	0	0	0	0	0	0	1e-05	0	0	0	0	0	3e-05	0	0	0	0	0
156456	Anaeroglobus geminatus	0	2e-05	0	0	0	0	0	0	0	0	0	0	0	0	0	0	0	0	1e-05	0	1e-05	0	0	0	0	0	0	0	0	0	0	2e-05	0	0	0	0	1e-05	0	0	1e-05	0	0	0	0	0	0	0	0
209880	Allisonella histaminiformans	0	0	0.00032	2e-05	0	0.00044	0.00012	0	0	2e-05	0.00031	0	0	0	0	0	0	0	0	0	0	0	0	1e-05	0	0.00013	0	0	0	0	0	0	0.0001	0	0	0	2e-05	0	0	0	0	0.00052	0	0	8e-05	0	0	0
1852379	Colibacter massiliensis	0	0	0	0	0	0	0	0	0	0	0	0	0	0	0	0	0	0	0	0	0	0	0	0	0	0	0	0	0	0	0	0	0	0	0	0	0	0	0	0	0	0	0	0	0	0	0	0
971	Selenomonas ruminantium	1e-05	2e-05	2e-05	8e-05	4e-05	2e-05	6e-05	2e-05	6e-05	2e-05	2e-05	2e-05	0	0	0	0	0	0	0.0001	2e-05	3e-05	7e-05	0	4e-05	4e-05	0	0	0	0	0	0	0.00125	0	1e-05	3e-05	4e-05	7e-05	5e-05	6e-05	7e-05	0	0	0	0.00145	0.00379	0	6e-05	0
135083	Selenomonas noxia	0	1e-05	0	1e-05	0	0	0	0	0	0	0	0	0	0	0	0	0	0	1e-05	0	0	1e-05	0	0	1e-05	0	0	0	0	0	0	0	0	0	0	0	1e-05	0	1e-05	0	0	0	0	0	0	0	0	0
1884263	Selenomonas sp. oral taxon 920	0	0	0	0	0	0	0	0	0	0	0	1e-05	0	0	0	0	0	0	0	0	0	1e-05	0	0	0	0	0	0	0	0	0	0	0	0	0	0	0	0	0	0	0	0	0	0	0	0	0	0
69823	Selenomonas sputigena	0	0	0	1e-05	0	0	1e-05	0	0	0	0	0	0	0	0	0	0	0	0	0	0	1e-05	0	0	0	0	0	0	0	0	0	0	0	0	0	0	1e-05	0	1e-05	1e-05	0	0	0	0	4e-05	0	0	0
1410618	Selenomonas sp. ND2010	0	0	0	0	0	0	0	0	0	0	0	0	0	0	0	0	0	0	0	0	0	0	0	0	0	0	0	0	0	0	0	0	0	0	0	0	0	0	0	0	0	0	0	0	0	0	0	0
1321785	Selenomonas sp. oral taxon 892	0	0	0	0	0	0	0	0	0	0	0	0	0	0	0	0	0	0	0	0	0	0	0	0	0	0	0	0	0	0	0	0	0	0	0	0	0	0	0	0	0	0	0	0	0	0	0	0
999423	Selenomonas sp. F0473	0	0	0	0	1e-05	1e-05	1e-05	0	0	0	1e-05	0	0	0	0	0	0	0	0	0	0	1e-05	0	1e-05	0	0	0	0	0	0	0	0	0	0	0	0	0	0	0	1e-05	0	0	0	0	0	0	0	0
671224	Selenomonas artemidis	0	0	0	0	0	0	0	0	0	0	0	0	0	0	0	0	0	0	0	0	0	0	0	0	0	0	0	0	0	0	0	0	0	0	0	0	0	0	0	1e-05	0	0	0	0	0	0	0	0
135082	Selenomonas infelix	0	0	0	0	0	0	0	0	0	0	0	0	0	0	0	0	0	0	0	0	0	0	0	0	0	0	0	0	0	0	0	0	0	0	0	0	0	0	0	0	0	0	0	0	0	0	0	0
712532	Selenomonas sp. oral taxon 138	0	0	0	1e-05	0	0	0	0	0	0	0	0	0	0	0	0	0	0	0	0	0	0	0	0	0	0	0	0	0	0	0	0	0	0	0	0	1e-05	0	1e-05	1e-05	0	0	0	0	0	0	0	0
712538	Selenomonas sp. oral taxon 478	0	0	0	0	0	0	1e-05	0	0	0	0	0	0	0	0	0	0	0	0	0	0	0	0	0	0	0	0	0	0	0	0	0	0	0	0	0	0	0	1e-05	0	0	0	0	0	0	0	0	0
416586	Selenomonas bovis	0	0	1e-05	2e-05	1e-05	0	1e-05	1e-05	1e-05	0	0	1e-05	0	0	0	0	0	0	2e-05	0	1e-05	3e-05	0	1e-05	1e-05	0	0	0	0	0	0	0	0	0	0	1e-05	3e-05	1e-05	2e-05	2e-05	0	0	0	0	0	0	0	0
1485543	Selenomonas sp. AE3005	0	0	0	0	0	0	0	0	0	0	1e-05	1e-05	0	0	0	0	0	0	1e-05	0	0	1e-05	0	1e-05	0	0	0	0	0	0	0	0	0	0	0	0	0	0	0	0	0	0	0	0	0	0	0	0
158847	Megamonas hypermegale	0	1e-05	0	0	1e-05	0	0	1e-05	0	0	0	0	0	0	0	0	0	0	0	1e-05	0	0	0	1e-05	0	0	0	0	0	0	0	0	0	0	0	1e-05	0	0	1e-05	0	0	0	0	0	0.0003	0	0	0
437897	Megamonas funiformis	0	0	0	1e-05	0	0	0	1e-05	0	0	0	0	0	3e-05	0	0	0	3e-05	0	0	0	0	0	0	0	0	0	0	0	0	0	0	0.00092	0	0	0	1e-05	0	0.00012	0	0	0	3e-05	0.00029	0.00016	0	0	0
1946842	Megamonas sp. UBA1799	0	0	0	0	0	0	0	0	0	0	0	0	0	0	0	0	0	0	1e-05	0	0	1e-05	0	0	1e-05	0	0	0	0	0	0	0	0	0	0	0	1e-05	0	1e-05	0	0	0	0	0	0	0	0	0
1946841	Megamonas sp. UBA1796	0	0	0	1e-05	0	0	0	0	0	0	0	0	0	0	0	0	0	0	0	0	0	0	0	0	0	0	0	0	0	0	0	0	0	0	0	0	1e-05	0	0	0	0	0	0	0	0	0	0	0
1953026	Selenomonadaceae bacterium UBA7286	0	0	0	1e-05	1e-05	0	1e-05	1e-05	0	0	0	0	0	0	0	0	0	0	2e-05	0	0	2e-05	0	1e-05	1e-05	0	0	0	0	0	0	0	0	0	0	1e-05	1e-05	0	1e-05	1e-05	0	0	0	0	0	0	0	0
1953022	Selenomonadaceae bacterium UBA2897	0	0	1e-05	1e-05	1e-05	0	1e-05	0	0	0	0	0	0	0	0	0	0	0	0	0	0	1e-05	0	0	0	0	0	0	0	0	0	0	0	0	0	1e-05	1e-05	0	2e-05	1e-05	0	0	0	0	0	0	0	0
1953024	Selenomonadaceae bacterium UBA3796	0	0	0	1e-05	0	0	0	0	0	0	0	0	0	0	0	0	0	0	0	0	0	0	0	0	0	0	0	0	0	0	0	0	0	0	0	0	1e-05	0	0	0	0	0	0	0	0	0	0	0
1321780	Mitsuokella sp. oral taxon 131	0	0	0	0	0	0	0	0	0	0	0	0	0	0	0	0	0	5e-05	0	0	0	1e-05	0	0	0	0.00137	0	0	0	0.00105	0	0	0	0	0	0	1e-05	0	1e-05	1e-05	0	0	0	0	0.00049	0.00119	5e-05	2e-05
52226	Mitsuokella multacida	0	0	0	0.00284	0	0	1e-05	0	1e-05	0	0	0	0	0	0	0	0	0	0	0	0	1e-05	0	0	0	0	0	0	0	0	0	0	0	0	0	0	0.00241	0	1e-05	1e-05	0	0	0	0	0	0	0	0
187979	Mitsuokella jalaludinii	0	0	1e-05	0.00025	1e-05	0	1e-05	0	0	0	0	0	0	0	0	0	0	0	0	0	0	1e-05	0	0	0	0	0	0	0	0	0	0	0	0	4e-05	1e-05	0.00021	0	1e-05	2e-05	0	0	0	0	0	0	0	0
82374	Anaerovibrio lipolyticus	0	0	0	1e-05	0	0	0	0	0	0	0	1e-05	0	0	0	0	0	0	1e-05	0	0	1e-05	0	0	0	0	0	0	0	0	0	0	0	0	1e-05	0	1e-05	0	0	0	0	0	0	0	0	0	0	0
1240085	Anaerovibrio sp. JC8	0	0	0	0	0	0	0	0	0	0	0	0	0	0	0	0	0	0	1e-05	0	0	0	0	0	0	0	0	0	0	0	0	0	0	0	0	0	0	0	0	0	0	0	0	0	0	0	0	0
55507	Schwartzia succinivorans	0	0	0	0	0	0	0	0	0	0	0	0	0	0	0	0	0	0	0	0	0	0	0	1e-05	0	0	0	0	0	0	0	0	0	0	0	1e-05	0	0	1e-05	0	0	0	0	0	5e-05	0	0	0
84035	Propionispira arboris	0	0	0	0	0	0	0	0	0	0	0	0	0	0	0	0	0	0	0	0	0	0	0	0	0	0	0	0	0	0	0	0	0	0	0	0	0	0	0	0	0	0	0	0	0	0	0	0
365349	Pelosinus fermentans	1e-05	0	0	0	0	0	1e-05	0	0	0	0	0	0	0	0	0	0	0	0	0	0	0	0	0	0	0	0	0	0	0	0	0	0	0	0	0	0	0	0	0	0	0	0	0	0	0	0	0
484770	Pelosinus sp. UFO1	0	0	0	0	0	0	0	0	0	0	0	1e-05	0	0	0	0	0	3e-05	0	0	0	0	0	0	0	0	0	0	0	0	0	0	0	0	0	0	0	0	0	0	0	0	0	0	3e-05	0	0	0
112900	Sporomusa acidovorans	0	0	0	0	0	0	0	0	0	0	0	1e-05	0	0	0	0	0	0	0	0	0	0	0	0	0	0	0	0	0	0	0	0	0	0	0	1e-05	1e-05	0	0	0	0	0	0	0	0	0	0	0
47679	Sporomusa sphaeroides	0	0	0	0	0	0	0	0	0	0	0	0	0	0	0	0	0	0	0	0	0	0	0	0	0	0	0	0	0	0	0	0	0	0	0	0	0	0	0	0	0	0	0	0	0	0	0	0
307249	uncultured Sporomusa sp.	0	0	0	0	0	0	0	0	0	0	0	0	0	0	0	0	0	0	0	0	0	0	0	0	0	0	0	0	0	0	0	0	0	0	0	0	0	0	0	0	0	0	0	0	0	0	0	0
2378	Sporomusa ovata	0	0	0	0	0	0	0	0	0	0	0	0	0.0003	0.00017	0.00019	0.00029	7e-05	0.00028	0	0	0	0	0	0	0	0.00016	0.00045	0.00027	0.00019	0.00025	0.00058	0.00082	0.00045	0	0	0	0	0	0	0	0.0001	0.00042	0.00013	0.00025	0.00138	0.0003	0.0007	0.00019
55504	Sporomusa silvacetica	0	0	0	0	0	0	0	0	0	0	0	0	0	0	0	0	0	0	1e-05	0	0	0	0	0	0	0	0	0	0	0	0	0	0	0	0	0	0	0	0	0	0	0	0	0	0	0	0	0
112903	Propionispora vibrioides	0	0	0	0	0	0	0	0	0	0	0	0	0	0	0	0	0	0	0	0	0	0	0	0	0	0	0	0	0	0	0	0	0	0	0	0	0	0	0	0	0	0	0	0	0	0	0	0
1677858	Propionispora sp. 2/2-37	0	0	0	0	1e-05	0	0	0	0	0	0	0	0	0	0	0	0	0	0	0	0	0	0	0	0	0	0	0	0	0	0	0	0	0	0	0	0	0	0	0	0	0	0	0	0	0	0	0
608505	Sporolituus thermophilus	0	0	0	0	0	0	0	0	0	0	0	0	0	0	0	0	0	0	0	0	0	0	0	0	0	0	0	0	0	0	0	0	0	0	0	0	0	0	0	0	0	0	0	0	0	0	0	0
146817	Dendrosporobacter quercicolus	0	0	0	0	0	0	0	0	0	0	0	0	0	0	0	0	0	0	0	0	0	1e-05	0	0	0	0	0	0	0	0	0	0	0	0	0	0	0	0	0	0	0	0	0	0	0	0	0	0
261685	Thermosinus carboxydivorans	0	0	0	0	0	0	0	0	0	0	0	0	0	0	0	0	0	0	0	0	0	0	0	0	0	0	0	0	0	0	0	0	0	0	0	0	0	0	0	0	0	0	0	0	0	0	0	0
1953031	Sporomusaceae bacterium UBA7701	0	0	0	1e-05	0	0	0	0	0	0	0	0	0	0	0	0	0	0	0	0	0	0	0	0	0	0	0	0	0	0	0	0	0	0	0	0	1e-05	0	0	0	0	0	0	0	0	0	0	0
1304	Streptococcus salivarius	0.00378	0.00113	0.00014	4e-05	0.00024	0.00011	0.00071	0.00123	0.00167	0.00078	0.0007	0.0002	0	0	0	0	0	0	0.00092	0.0014	0.00023	0.00013	0	0.0007	0.00071	0	0	0	0	0	0	0	0.0001	0.00021	0.00025	0.00188	4e-05	0.00026	0.00185	5e-05	0	0	0	0	0	0	0	0
1739422	Streptococcus sp. HMSC065C01	0.00088	0.0005	1e-05	0	5e-05	4e-05	0.00063	0.00028	0.00079	0.00039	3e-05	0.00019	0	0	0	0	0	0	0.00021	0.00023	7e-05	0.00012	0	3e-05	0.00039	0	3e-05	0	0	0	0	0	4e-05	0.00011	0.00011	0.0001	0	0.00011	0.00063	1e-05	0	0	5e-05	0	0	0	0	0
1318	Streptococcus parasanguinis	0.00067	0.00048	2e-05	0	5e-05	7e-05	0.00081	0.00024	0.00099	0.00036	7e-05	0.00022	0.00015	0	0	0	7e-05	0	0.00031	0.00018	0.0001	0.00016	0	6e-05	0.00052	2e-05	0	0	0	0	0	2e-05	4e-05	9e-05	0.00016	0.00016	0	0.00015	0.00064	2e-05	0	0	0	0	2e-05	0	3e-05	0
1308	Streptococcus thermophilus	0.00049	4e-05	0.00013	0.00018	0.00395	0.00192	4e-05	6e-05	0.00015	0.00013	0.00047	1e-05	0	0	0	0	0	0	0.00099	0.01992	1e-05	2e-05	0	2e-05	5e-05	0	0	0	0	0	0	0	0	1e-05	6e-05	0.00081	1e-05	0.00023	0.00387	1e-05	0	0	0	0	0	0	0	0
1335	Streptococcus equinus	0.0002	9e-05	1e-05	0	3e-05	2e-05	7e-05	0.00011	0.00019	6e-05	5e-05	2e-05	0	0	0	0	0	0	0.00014	0.00024	3e-05	2e-05	0	6e-05	4e-05	0	0	0	0	0	0	0	0	3e-05	3e-05	0.0002	0	4e-05	0.0002	1e-05	0	0	0	0	0	0	0	0
1343	Streptococcus vestibularis	0.0002	7e-05	1e-05	0	4e-05	2e-05	3e-05	5e-05	9e-05	4e-05	4e-05	2e-05	0.00238	0.00037	0.00113	0.00045	0.00067	0.0003	7e-05	0.00022	1e-05	2e-05	0	4e-05	3e-05	0.00056	0.00068	0.00014	0.00052	0.00026	0.00027	0.00038	0.0029	1e-05	2e-05	0.0001	1e-05	2e-05	0.00011	0	0.00033	0.00071	0.00105	0.00072	0.00014	0.00065	0.00056	0.00027
999425	Streptococcus sp. F0442	0.00015	0.00012	1e-05	0	1e-05	3e-05	0.00014	7e-05	0.00024	7e-05	2e-05	4e-05	0	0	0	0	0	0	7e-05	5e-05	3e-05	3e-05	0	8e-05	9e-05	0	0	0	0	0	0	0	0	2e-05	3e-05	2e-05	0	3e-05	0.00021	1e-05	0	0	0	0	0	0	0	0
28037	Streptococcus mitis	0.0001	9e-05	3e-05	3e-05	3e-05	0.00011	0.00016	0.00014	7e-05	3e-05	7e-05	2e-05	0.00384	0.00118	0.0024	0.00113	0.0037	0.00156	2e-05	0.00011	5e-05	2e-05	0	4e-05	8e-05	0.0009	0.00462	0.00137	0.00231	0.00122	0.00112	0.00156	0.00765	1e-05	4e-05	6e-05	4e-05	5e-05	7e-05	1e-05	0.00183	0.0027	0.00071	0.00252	0.0014	0.00127	0.00522	0.00167
435842	Streptococcus sp. C150	6e-05	2e-05	0	0	1e-05	1e-05	1e-05	2e-05	3e-05	1e-05	1e-05	1e-05	0	0	0	0	0	0	2e-05	6e-05	0	0	0	1e-05	1e-05	0	0	0	0	0	0	0	0	0	1e-05	4e-05	0	1e-05	5e-05	0	0	0	0	0	0	0	0	0
1303	Streptococcus oralis	6e-05	2e-05	1e-05	1e-05	1e-05	3e-05	0.00025	8e-05	4e-05	2e-05	1e-05	1e-05	0	0	0.0001	0	0	0	1e-05	4e-05	4e-05	1e-05	0	3e-05	2e-05	4e-05	0	0	0	0	0	0	0	0	2e-05	4e-05	2e-05	1e-05	3e-05	1e-05	0	0	0	0	0	0	7e-05	0
1579343	Streptococcus sp. 263_SSPC	5e-05	5e-05	1e-05	1e-05	1e-05	2e-05	4e-05	0.00013	1e-05	1e-05	1e-05	0	0	0	0	0	0	0	0	4e-05	3e-05	0	0	2e-05	1e-05	0	0	0	0	0	0	0	0	0	2e-05	1e-05	1e-05	0	7e-05	1e-05	0	0	0	0	0	0	0	0
68892	Streptococcus infantis	4e-05	0.00016	2e-05	2e-05	2e-05	5e-05	0.0002	0.00016	0.00011	0.0001	1e-05	2e-05	0	0	0.00024	0	0.00028	4e-05	2e-05	9e-05	3e-05	2e-05	0	6e-05	4e-05	0	0	0	0.00028	0	0	3e-05	0.00034	0	2e-05	7e-05	2e-05	2e-05	9e-05	3e-05	0	0	0	4e-05	0	0.0001	5e-05	0
113107	Streptococcus australis	3e-05	3e-05	2e-05	0	1e-05	5e-05	4e-05	4e-05	5e-05	3e-05	3e-05	0	0	0	0	0	0	0	2e-05	2e-05	9e-05	1e-05	0	9e-05	3e-05	0	0	0	0	0	0	0	0	0	1e-05	1e-05	0	1e-05	7e-05	1e-05	0	0	0	0	0	0	0	0
197614	Streptococcus pasteurianus	3e-05	3e-05	0	8e-05	2e-05	0	2e-05	5e-05	3e-05	1e-05	1e-05	4e-05	0	0	0	0	0	0	0	3e-05	2e-05	4e-05	0	2e-05	2e-05	0	0	0	0	0	0	0	0	2e-05	0	3e-05	6e-05	1e-05	1e-05	2e-05	0	0	0	0	0	0	0	0
102684	Streptococcus infantarius	7e-05	2e-05	0	3e-05	2e-05	2e-05	1e-05	0.00014	1e-05	1e-05	1e-05	1e-05	0.00029	0	0	0	0	0	1e-05	0.0002	1e-05	0	0	2e-05	0	0	0	0	0	0	0	6e-05	0.0004	0.0001	1e-05	2e-05	3e-05	0	1e-05	0	0	0	0	0	0	0	0	0
257758	Streptococcus pseudopneumoniae	3e-05	3e-05	1e-05	1e-05	1e-05	1e-05	7e-05	5e-05	4e-05	3e-05	1e-05	1e-05	0	0	0	0	0	0	1e-05	2e-05	1e-05	1e-05	0	1e-05	2e-05	0	0	0	0	0	0	0	0	0	1e-05	2e-05	1e-05	1e-05	3e-05	1e-05	0	0	0	0	0	0	0	0
1156433	Streptococcus sp. I-P16	2e-05	2e-05	1e-05	0	1e-05	2e-05	6e-05	0.00032	9e-05	9e-05	1e-05	1e-05	0	0	0	0	0	0	2e-05	2e-05	5e-05	1e-05	0	0.00044	6e-05	0	0	0	0	0	0	0	0	1e-05	1e-05	1e-05	1e-05	2e-05	0.00024	2e-05	0	0	0	0	0	0	0	0
45634	Streptococcus cristatus	2e-05	1e-05	0	0	0	0	2e-05	2e-05	1e-05	0	0	0	0	0	0	0	0	0	0	1e-05	1e-05	0	0	2e-05	0	0	0	0	0	0	0	0	0	0	0	0	1e-05	0	1e-05	0	0	0	0	0	0	0	0	0
1579342	Streptococcus sp. 343_SSPC	2e-05	2e-05	1e-05	0	1e-05	4e-05	5e-05	4e-05	5e-05	5e-05	3e-05	1e-05	0	0	0	0	0	0	1e-05	1e-05	6e-05	1e-05	0	6e-05	2e-05	0	0	0	0	0	0	0	7e-05	1e-05	1e-05	2e-05	0	1e-05	6e-05	1e-05	0	0	0	0	0	0	0	0
1338	Streptococcus intermedius	1e-05	0	0	0	0	0	0	1e-05	0	0	0	0	0	0	0	0	0	0	0	0	0	0	0	1e-05	0	0	0	0	0	0	0	0	0	0	0	1e-05	0	0	1e-05	0	0	0	0	0	0	0	0	0
1328	Streptococcus anginosus	1e-05	1e-05	0	0	0	0	2e-05	1e-05	1e-05	1e-05	0	0	0	0	0	0	0	0	0	1e-05	0	0	0	1e-05	0	0	0	0	0	0	0	0	0	0	0	2e-05	0	0	1e-05	0	0	0	0	0	0	0	0	0
76860	Streptococcus constellatus	0	0	0	0	0	0	0	1e-05	1e-05	0	0	0	0	0	0	0	0	0	0	1e-05	0	0	0	2e-05	1e-05	0	0	0	0	0	0	0	0	0	1e-05	1e-05	2e-05	0	0	0	0	0	0	0	0	0	0	0
1759399	Streptococcus sp. A12	2e-05	2e-05	1e-05	0	1e-05	2e-05	3e-05	2e-05	3e-05	2e-05	1e-05	1e-05	0	0	0	0	0	0	1e-05	1e-05	5e-05	1e-05	0	4e-05	2e-05	0	0	0	0	0	0	0	0	0	1e-05	1e-05	0	1e-05	4e-05	0	0	0	0	0	0	0	0	0
1579348	Streptococcus sp. 1171_SSPC	2e-05	2e-05	1e-05	0	0	2e-05	4e-05	3e-05	4e-05	3e-05	2e-05	1e-05	0	0	0	0	0	0	1e-05	1e-05	6e-05	1e-05	0	5e-05	2e-05	0	0	0	0	0	0	6e-05	0	0	1e-05	2e-05	0	1e-05	4e-05	0	0	0	0	0	0	5e-05	0	0
1307	Streptococcus suis	1e-05	2e-05	3e-05	3e-05	9e-05	2e-05	2e-05	4e-05	3e-05	4e-05	2e-05	2e-05	5e-05	0	0	0	0	0	2e-05	5e-05	0.00043	3e-05	0	3e-05	2e-05	0	3e-05	0	0	2e-05	0	0	4e-05	0	2e-05	3e-05	3e-05	1e-05	3e-05	1e-05	0	4e-05	7e-05	0	0	4e-05	0	0
1302	Streptococcus gordonii	1e-05	0	0	0	0	0	5e-05	1e-05	1e-05	0	1e-05	0	0	0	0	0	0	0	0	0	2e-05	0	0	1e-05	1e-05	0	0	0	0	0	0	0	0	0	0	1e-05	1e-05	0	3e-05	0	0	0	0	0	0	0	0	0
269666	Streptococcus marimammalium	1e-05	0	0	0	0	0	0	0	0	0	0	0	0	0	0	0	0	0	0	1e-05	0	0	0	0	0	0	0	0	0	0	0	0	0	0	0	0	0	0	0	0	0	0	0	0	0	0	0	0
1169671	Streptococcus sp. GMD2S	1e-05	0	0	0	1e-05	0	3e-05	1e-05	0	0	0	0	0	0	0	0	0	0	0	0	0	0	0	0	0	0	0	0	0	0	0	0	0	0	0	0	0	0	0	0	0	0	0	0	0	0	0	0
502567	Streptococcus porci	1e-05	1e-05	0	0	0	0	0	0	0	0	0	0	0	0	0	0	0	0	0	1e-05	0	0	0	0	0	0	0	0	0	0	0	0	0	0	0	0	0	0	0	0	0	0	0	0	0	0	0	0
114652	Streptococcus orisratti	1e-05	0	0	1e-05	0	1e-05	0	1e-05	1e-05	0	1e-05	0	0	0	0	0	0	0	0	0	0	0	0	0	0	0	0	0	0	0	0	0	0	0	2e-05	1e-05	1e-05	0	1e-05	0	0	0	0	0	0	0	0	0
1739461	Streptococcus sp. HMSC062D07	1e-05	1e-05	0	0	0	0	1e-05	1e-05	1e-05	1e-05	0	0	0	0	0	0	0	0	0	1e-05	0	0	0	0	0	0	0	0	0	0	0	0	0	0	0	1e-05	0	0	1e-05	0	0	0	0	0	0	0	0	0
1777878	Streptococcus sp. DD10	1e-05	0	0	0	0	0	1e-05	0	1e-05	0	0	0	0	0	0	0	0	0	0	0	0	0	0	0	0	0	0	0	0	0	0	0	0	0	0	0	0	0	1e-05	0	0	0	0	0	0	0	0	0
712624	Streptococcus sp. oral taxon 064	1e-05	0	0	0	0	0	2e-05	0	0	0	0	0	0	0	0	0	0	0	0	0	0	0	0	0	0	0	0	0	0	0	0	0	0	0	0	0	0	0	0	0	0	0	0	0	0	0	0	0
1715098	Streptococcus sp. HMSC074B11	1e-05	1e-05	0	0	0	0	1e-05	1e-05	1e-05	0	0	0	0	0	0	0	0	0	0	0	0	0	0	0	0	0	0	0	0	0	0	0	0	0	0	0	0	0	1e-05	0	0	0	0	0	0	0	0	0
1305	Streptococcus sanguinis	1e-05	0	0	0	0	0	0	1e-05	1e-05	0	0	0	5e-05	0	0	0	0	0	0	0	1e-05	0	0	2e-05	0	0	0	0	0	0	0	0	6e-05	0	1e-05	2e-05	0	0	1e-05	0	0	0	0	0	0	0	0	0
1608856	Streptococcus sp. HMSC34B10	1e-05	0	0	0	0	0	1e-05	0	1e-05	0	0	0	0	0	0	0	0	0	0	0	0	0	0	0	0	0	0	0	0	0	0	0	0	0	0	0	0	0	1e-05	0	0	0	0	0	0	0	0	0
936581	Streptococcus sp. CM7	1e-05	0	0	0	0	0	1e-05	0	1e-05	0	0	0	0	0	0	0	0	0	0	0	0	0	0	0	0	0	0	0	0	0	0	0	0	0	0	0	0	0	0	0	0	0	0	0	0	0	0	0
1860161	Streptococcus sp. CCUG 49591	1e-05	0	0	0	0	0	0	0	0	0	0	0	0	0	0	0	0	0	0	0	0	0	0	0	0	0	0	0	0	0	0	0	0	0	0	0	0	0	0	0	0	0	0	0	0	0	0	0
400065	Streptococcus merionis	0	0	0	0	0	0	0	0	0	0	0	0	0	0	0	0	0	0	0	0	0	0	0	0	0	0	0	0	0	0	0	0	0	0	0	0	0	0	0	0	0	0	0	0	0	0	0	0
1777881	Streptococcus sp. DD13	0	0	0	0	0	0	0	0	0	0	0	0	0	0	0	0	0	0	0	0	0	0	0	0	0	0	0	0	0	0	0	0	6e-05	0	0	0	0	0	0	0	0	0	0	0	0	0	0	0
1336	Streptococcus equi	0	0	0	0	0	0	0	0	0	0	0	0	0	0	0	0	0	0	0	0	0	0	0	0	0	0	0	0	0	0	0	0	0	0	0	0	0	1e-05	0	0	0	0	0	0	0	0	0	0
1334	Streptococcus dysgalactiae	0	0	0	0	0	0	0	0	0	0	0	0	0.00025	0	4e-05	7e-05	0	0	0	1e-05	0	0	0	0	0	2e-05	8e-05	0	9e-05	0	0	5e-05	0.00014	0	0	0	0	0	0	0	0	0	0	5e-05	0	0	0.00017	5e-05
1811193	Streptococcus pantholopis	0	0	0	0	0	0	0	1e-05	0	0	0	0	0	0	0	0	0	0	0	0	1e-05	0	0	0	0	0	0	0	0	0	0	0	0	0	0	0	0	0	0	0	0	0	0	0	0	0	0	0
1203590	Streptococcus sp. HPH0090	0	1e-05	0	0	0	0	1e-05	1e-05	1e-05	1e-05	0	0	0	0	0	0	0	0	0	1e-05	0	0	0	0	0	0	0	0	0	0	0	0	0	0	0	0	0	0	1e-05	0	0	0	0	0	0	0	0	0
1739491	Streptococcus sp. HMSC067H01	0	0	0	0	0	0	1e-05	0	0	0	0	0	0	0	0	0	0	0	0	0	0	0	0	0	0	0	0	0	0	0	0	0	0	0	0	1e-05	0	0	0	0	0	0	0	0	0	0	0	0
1309	Streptococcus mutans	0	0	0	1e-05	1e-05	0	1e-05	0	1e-05	1e-05	1e-05	0	0	2e-05	0	0	0	0.0002	0	1e-05	1e-05	0	0	0	1e-05	0	0	0	0	0	0	6e-05	0.00024	0	0	0	1e-05	0	2e-05	0	0	0	0	0	0	0	0	0
439220	Streptococcus caballi	0	0	0	0	0	0	0	0	0	0	0	0	0	0	0	0	0	0	0	0	0	0	0	0	0	0	0	0	0	0	0	0	0	0	0	0	0	0	0	0	0	0	0	0	0	0	0	0
1739341	Streptococcus sp. HMSC071D03	0	0	0	0	0	0	1e-05	0	0	0	0	0	0	0	0	0	0	0	0	0	0	0	0	0	0	0	0	0	0	0	0	0	0	0	0	0	0	0	1e-05	0	0	0	0	0	0	0	0	0
1768777	Streptococcus sp. CCH8-C6	0	0	0	0	0	0	0	0	0	0	0	0	0	0	0	0	0	0	0	0	0	0	0	1e-05	0	0	0	0	0	0	0	0	0	0	0	0	0	0	0	0	0	0	0	0	0	0	0	0
1080071	Streptococcus orisasini	0	0	0	0	0	0	0	0	3e-05	0	0	0	0	0	0	0	0	0	1e-05	0	1e-05	0	0	0	0	0	0	0	0	0	0	0	0	0	8e-05	0	2e-05	1e-05	0	0	0	0	0	0	0	0	0	0
313439	Streptococcus massiliensis	0	0	0	0	0	0	0	0	0	0	0	0	0	0	0	0	0	0	0	0	0	0	0	0	0	0	0	0	0	0	0	0	0	0	0	0	0	0	0	0	0	0	0	0	0	0	0	0
315405	Streptococcus gallolyticus	1e-05	0	0	1e-05	0	0	0	0.0006	0	0	0	0	0	0	0	0	0	0	0	2e-05	0	0	0	0	0	0	0	0	0	0	0	0	0	0	0	0	0	0	0	0	0	0	0	0	0	0	0	0
1676616	Streptococcus sp. X13SY08	0	0	0	0	0	0	0	0	0	0	0	0	0	0	0	0	0	0	0	0	0	0	0	0	0	0	2e-05	0	0	0	0	0	0	0	0	0	1e-05	0	0	0	0	0	0	2e-05	0	3e-05	0	0
1739299	Streptococcus sp. HMSC056C01	0	0	0	0	0	0	1e-05	0	1e-05	0	0	0	0	0	0	0	0	0	0	0	0	0	0	0	0	0	0	0	0	0	0	0	0	0	0	0	0	0	0	0	0	0	0	0	0	0	0	0
229549	Streptococcus minor	0	0	0	0	0	0	0	0	0	0	0	0	0	0	0	0	0	0	0	0	0	0	0	0	0	0	0	0	0	0	0	0	2e-05	0	0	0	0	0	0	0	0	0	0	0	0	0	0	0
1311	Streptococcus agalactiae	0	0	0	0	0	0	0	0	0	0	0	0	0	0	0	0	0	0	0	5e-05	0	0	0	0	0	0	0	0	0	0	0	0	0	0	0	0	0	0	0	0	0	0	0	0	0	0	0	0
1852387	Streptococcus timonensis	0	1e-05	0	0	0	0	1e-05	1e-05	1e-05	0	0	0	0	0	0	0	0	0	0	0	0	0	0	0	0	0	0	0	0	0	0	0	0	0	0	1e-05	0	0	0	0	0	0	0	0	0	0	0	0
1349	Streptococcus uberis	0	0	0	0	0	0	0	0	0	0	0	0	0	0	0	0	0	0	0	1e-05	0	0	0	0	0	0	0	0	0	0	0	0	0	0	0	0	0	0	0	0	0	0	0	0	0	0	0	0
119224	Streptococcus phocae	0	0	0	0	0	0	0	0	0	0	0	0	0	0	0	0	0	0	0	0	0	0	0	0	0	0	0	0	0	0	0	0	0	0	0	0	0	0	0	0	0	0	0	0	0	0	0	0
176090	Streptococcus sinensis	0	0	0	0	0	0	0	0	0	0	0	0	0	0	0	0	0	0	0	0	0	0	0	0	0	0	0	0	0	0	0	0	0	0	0	0	0	0	0	0	0	0	0	0	0	0	0	0
149016	Streptococcus urinalis	0	0	0	0	0	0	0	0	0	0	0	0	0	0	0	0	0	0	0	0	0	0	0	0	0	0	0	0	0	0	0	0	0	0	0	0	0	0	0	0	0	0	0	0.00042	0	0	0	0
231233	Streptococcus devriesei	0	0	0	0	0	0	0	0	0	0	0	0	0	0	0	0	0	0	0	0	0	0	0	0	0	0	0	0	0	0	0	0	0	0	0	0	0	0	1e-05	0	0	0	0	0	0	0	0	0
712620	Streptococcus sp. oral taxon 056	0	0	0	0	0	0	0	0	0	0	0	0	0	0	0	0	0	0	0	0	0	0	0	0	0	0	0	0	0	0	0	0	0	0	0	0	0	0	0	0	0	0	0	0	0	0	3e-05	0
1313	Streptococcus pneumoniae	0	0	0	0	0	0	1e-05	0	0	0	0	0	0	0	0	0	0	0	0	0	0	0	0	0	0	0	0	0	0	0	0	0	0	0	0	0	0	0	0	0	0	0	0	0	0	0	0.00011	0
1947566	Streptococcus sp. UBA632	0	0	0	0	0	0	0	0	0	0	0	0	0	0	0	0	0	0	0	0	0	0	0	0	0	0	0	0	0	0	0	0	0	0	0	0	0	0	0	0	0	0	0	0	0	0	0	0
1346	Streptococcus iniae	0	0	0	0	0	0	0	0	0	0	0	0	0	0	0	0	0	0	0	0	0	0	0	0	0	0	0	0	0	0	0	0	0	0	0	0	0	0	0	0	0	0	0	0	0	0	0	0
1915004	Streptococcus sp. 'caviae'	0	0	0	0	0	0	0	0	0	0	0	0	0	0	0	0	0	0	0	0	0	0	0	0	0	2e-05	0	0	0	0	0	0	0	0	0	0	0	0	0	0	0	0	0	0	0	0	0	0
1419814	Streptococcus sp. VT 162	0	0	0	0	0	0	2e-05	1e-05	0	0	0	0	0	0	0	0	0	0	0	0	0	0	0	0	0	0	0	0	0	0	0	0	0	0	0	0	0	0	0	0	0	0	0	0	0	0	0	0
1855327	Streptococcus sp. NLAE-zl-C503	0	0	0	0	0	0	1e-05	0	0	0	0	0	0	0	0	0	0	0	0	0	0	0	0	0	0	0	0	0	0	0	0	0	0	0	0	0	0	0	0	0	0	0	0	0	0	0	0	0
1403937	Streptococcus sp. DORA_10	0	0	0	0	0	0	0	1e-05	1e-05	0	0	0	0	0	0	0	0	0	0	0	0	0	0	0	0	0	0	0	0	0	0	0	0	0	0	0	0	0	1e-05	0	0	0	0	0	0	0	0	0
1776578	Streptococcus sp. DD04	0	0	0	0	0	0	0	0	0	0	0	0	0	0	0	0	0	0	0	0	0	0	0	0	0	0	0	0	0	0	0	0	0	0	0	0	0	0	0	0	0	0	0	0	0	0	0	0
1975706	Streptococcus sp. FDAARGOS_256	0	0	0	0	0	0	3e-05	0	0	0	0	0	0	4e-05	0.00041	0	0.00045	0	0	1e-05	0	0	0	0	0	0	0	7e-05	0	0	0	0	0.00034	0	0	0	0	0	0	0	0	0	2e-05	5e-05	4e-05	0	0.00016	2e-05
1604598	Streptococcus sp. DBCMS	0	0	0	0	0	0	1e-05	0	0	0	0	0	0	0	0	0	0	0	0	0	0	0	0	0	0	0	0	0	0	0	0	0	0	0	0	0	0	0	0	0	0	0	0	0	0	0	0	0
1579424	Streptococcus azizii	0	0	0	0	0	0	0	0	0	0	0	0	0	0	0	0	0	0	0	0	0	0	0	0	0	0	0	0	0	0	0	0	0	0	0	0	0	0	0	0	0	0	0	0	0	0	0	0
1432788	Streptococcus cuniculi	0	0	0	0	0	0	0	0	0	0	0	0	0	0	0	0	0	0	0	0	0	0	0	0	0	0	0	0	0	0	0	0	0	0	0	0	0	0	0	0	0	0	0	0	0	0	0	0
1326	Streptococcus acidominimus	0	0	0	0	0	0	0	0	0	0	0	0	0	0	0	0	0	0	0	0	0	0	0	0	0	0	0	0	0	0	0	0	0	0	0	0	0	0	0	0	0	0	0	0	0	0	0	0
1341	Streptococcus ratti	0	0	0	0	0	0	0	0	0	0	0	0	0	0	0	0	0	0	0	1e-05	0	0	0	0	0	0	0	0	0	0	0	0	0	0	0	0	0	0	0	0	0	0	0	0	0	0	0	0
150055	Streptococcus lutetiensis	0	0	0	0	0	0	0	1e-05	0	0	0	0	0	0	0	0	0	0	0	0	0	0	0	0	0	0	0	0	0	0	0	0	0	0	0	0	0	0	0	0	0	0	0	0	0	0	0	0
68891	Streptococcus peroris	0	0	0	0	0	0	0	0	0	0	0	0	0	0	0	0	0	0	0	0	0	0	0	0	0	0	0	0	0	0	0	0	0	0	0	0	0	0	0	0	0	0	0	0	0	0	0	0
82806	Streptococcus ovis	0	0	0	0	0	0	0	0	0	0	0	0	0	0	0	0	0	0	0	0	0	0	0	0	0	0	0	0	0	0	0	0	0	0	0	0	0	0	0	0	0	0	0	0	0	0	0	0
439219	Streptococcus henryi	0	0	0	0	0	0	0	0	0	0	0	0	0	0	0	0	0	0	0	0	0	0	0	0	0	0	0	0	0	0	0	0	0	0	0	0	0	0	0	0	0	0	0	0	0	0	0	0
1856638	Streptococcus bovimastitidis	0	0	0	0	0	0	0	0	0	0	0	0	0	0	0	0	0	0	0	0	0	0	0	0	0	0	0	0	0	0	0	0	0	0	0	0	0	0	0	0	0	0	0	0	0	0	0	0
1715207	Streptococcus sp. HMSC061D10	0	0	0	0	0	0	0	0	0	0	0	0	0	0	0	0	0	0	0	0	0	0	0	0	0	0	0	0	0	0	0	0	0	0	0	0	0	0	0	0	0	0	0	0	0	0	0	0
1739268	Streptococcus sp. HMSC073F11	0	0	0	0	0	0	0	0	0	0	0	0	0	0	0	0	0	0	0	0	0	0	0	0	0	0	0	0	0	0	0	0	0	0	0	0	0	0	0	0	0	0	0	0	0	0	0	0
1777880	Streptococcus sp. DD12	0	0	0	0	0	0	0	0	0	0	0	0	6e-05	0	6e-05	0	0	0	0	0	0	0	0	0	0	0	0	0	5e-05	0	0	2e-05	5e-05	0	0	0	0	0	0	0	0	0	0	6e-05	0	0	2e-05	0
1777879	Streptococcus sp. DD11	0	0	0	0	0	0	0	0	0	0	0	0	0	0	0	0	0	0	0	0	0	0	0	0	0	0	0	0	0	0	0	0	0	0	0	0	0	0	0	0	0	0	0	0	0	0	0	0
456876	Streptococcus plurextorum	0	0	0	0	0	0	0	0	0	0	0	0	0	0	0	0	0	0	0	1e-05	0	0	0	0	0	0	0	0	0	0	0	0	0	0	0	0	0	0	0	0	0	0	0	0	0	0	0	0
1111760	Streptococcus troglodytae	0	0	0	0	0	0	0	0	0	0	0	0	0.0001	0	0	0	0	0	0	0	0	0	0	0	0	0	0	0	0	0	0	0	5e-05	0	0	0	0	0	0	0	0	4e-05	0	0	0	0	0	0
1310	Streptococcus sobrinus	0	0	0	0	1e-05	0	0	0	0	0	0	0	0	0	0	0	7e-05	0	0	0	0	0	0	0	0	0	0	0	0	0	0	0	0	0	0	0	0	0	0	0	0	4e-05	0	0	0	0.00012	6e-05	0
1314	Streptococcus pyogenes	0	0	0	0	0	0	0	0	0	0	0	1e-05	0	0	0	0	0	0	0	0	0	0	0	0	0	0	0	0	0	0	0	0	0	0	0	0	0	0	0	0	0	0	0	0	0	0	0	0
1329	Streptococcus canis	0	0	0	0	0	0	0	0	0	0	0	0	0	0	0	0	0	0	0	0	0	0	0	0	0	0	0	0	0	0	0	0	0	0	0	0	0	0	0	0	0	0	0	0	0	0	0	0
1339	Streptococcus macacae	0	0	0	0	0	0	0	0	0	0	0	0	0.0001	0	2e-05	2e-05	0	5e-05	0	0	0	0	0	0	0	0	0	0	0	9e-05	2e-05	0	0.00011	0	0	0	0	0	0	0	0	7e-05	1e-05	2e-05	0	3e-05	0.0001	0
1340	Streptococcus porcinus	0	0	0	0	0	0	0	0	0	0	0	0	0	0	0	0	0	0	0	0	0	0	0	0	0	0	0	0	0	0	0	0	0	0	0	0	0	0	0	0	0	0	0	0	0	0	0	0
1345	Streptococcus ferus	0	0	0	0	0	0	0	0	0	0	0	0	0	0	0	0	0	0	0	0	0	0	0	0	0	0	0	0	0	0	0	0	0	0	0	0	0	0	0	0	0	0	0	0	0	0	0	0
1348	Streptococcus parauberis	0	0	0	0	0	0	0	0	0	0	0	0	0	0	0	0	0	0	0	1e-05	0	0	0	0	0	0	0	0	0	0	0	0	0	0	0	0	0	0	0	0	0	0	0	0	0	0	0	0
55085	Streptococcus thoraltensis	0	0	0	0	0	0	0	0	0	0	0	0	0	0	0	0	0	0	0	0	0	0	0	0	0	0	0	0	0	0	0	0	0	0	0	0	0	0	0	0	0	0	0	0	0	0	0	0
59310	Streptococcus macedonicus	0	0	0	0	0	0	0	0.00117	0	0	0	0	0	0	0	0	0	0	0	6e-05	0	0	0	0	0	0	0	0	0	0	0	0	0	0	0	0	0	0	0	0	0	0	0	0	0	0	0	0
149015	Streptococcus hyovaginalis	0	0	0	0	0	0	0	2e-05	0	0	0	0	5e-05	0	0	0	0	0	0	0	0	0	0	1e-05	0	0	0	0	0	0	0	0	0	0	0	0	0	0	0	0	0	0	0	0	0	0	0	0
254786	Streptococcus castoreus	0	0	0	0	0	0	0	0	0	0	0	0	0	0	0	0	0	0	0	0	0	0	0	0	0	0	0	0	0	0	0	0	0	0	0	0	0	0	0	0	0	0	0	0	0	0	0	0
361101	Streptococcus pseudoporcinus	0	0	0	0	0	0	0	0	0	0	0	0	0.00019	0	0.00011	0	0	4e-05	0	1e-05	0	0	0	0	0	2e-05	0.00015	4e-05	0	9e-05	3e-05	6e-05	0.00012	0	0	0	0	0	0	0	9e-05	0.0001	5e-05	0.00014	9e-05	0	0.0002	0.00017
1608583	Streptococcus varani	0	0	0	0	0	0	0	0	0	0	0	0	0	0	0	0	0	0	0	0	0	0	0	0	0	0	0	0	0	0	0	0	0	0	0	0	0	0	0	0	0	0	0	0	0	0	0	0
563038	Streptococcus sp. M334	0	0	0	0	0	0	0	0	0	0	0	0	0	0	0	0	0	0	0	0	0	0	0	0	0	0	0	0	0	0	0	0	0	0	0	0	0	0	0	0	0	0	0	0	0	0	0	0
712622	Streptococcus sp. oral taxon 058	0	0	0	0	0	0	1e-05	0	0	0	0	0	0	0	0	0	0	0	0	0	0	0	0	0	0	0	0	0	0	0	0	0	0	0	0	0	0	0	0	0	0	0	0	0	0	0	0	0
155680	Streptococcus entericus	0	0	0	0	0	0	0	0	0	0	0	0	0	0	0	0	0	0	0	0	0	0	0	0	0	0	0	0	0	0	0	0	0	0	0	0	0	0	0	0	0	0	0	0	0	0	0	0
1358	Lactococcus lactis	1e-05	0.00044	0	0	1e-05	0.00035	0	1e-05	2e-05	8e-05	0.00025	0	0	0	0	0	0	0	0	0.00294	2e-05	1e-05	0	0	0	0	0	0	0	0	0	0	0	0	8e-05	0.00073	0	3e-05	2e-05	1e-05	0	0	0	0	0	0	0	0
610251	Lactococcus fujiensis	0	0	0	0	0	0	0	0	0	0	0	0	0	0	0	0.00034	0	0	0	1e-05	0	0	0	0	0	0	0	0	0	0	0	0	2e-05	0	0	0	0	0	0	0	0	4e-05	0	0	0	0	0	0
1363	Lactococcus garvieae	0	1e-05	0	0	0	1e-05	0	0	0	0	1e-05	0	0	0	0	0	0	0	0	7e-05	0	0	0	0	0	0	0	0	0	0	0	0	0	0	0	2e-05	0	0	0	0	0	0	0	0	0	0	0	0
1366	Lactococcus raffinolactis	0	0.00023	0	0	0	1e-05	0	0	0	0	5e-05	0	0	0	0	0	0	0	0	9e-05	0	0	0	0	0	0	0	0	0	0	0	0	0	0	0	2e-05	0	0	0	0	0	0	0	0	0	0	0	0
1940789	Lactococcus petauri	0	0	0	0	1e-05	0	0	0	0	0	0	0	0	0	0	0	0	0	0	0	0	0	0	0	0	0	0	0	0	0	0	0	0	0	0	0	0	0	0	0	0	0	0	0	0	0	0	0
1364	Lactococcus piscium	0	0.00019	0	0	2e-05	1e-05	0	0	0	0	0	0	0	0	0	0	0	0	0	3e-05	0	0	0	0	0	0	0	0	0	0	0	0	0	0	0	0	0	0	1e-05	0	0	0	0	0	0	0	5e-05	0
451457	Lactococcus chungangensis	0	0	0	0	0	0	0	0	0	0	0	0	0	0	0	0	0	0	0	0	0	0	0	0	0	0	0	0	0	0	0	0	0	0	0	0	0	0	0	0	0	0	0	0	0	0	0	0
1859475	Floricoccus penangensis	0	0	0	0	0	0	0	0	0	0	0	0	0	0	0	0	0	0	0	0	0	0	0	0	0	0	0	0	0	0	0	0	0	0	0	0	0	0	0	0	0	0	0	0	0	0	0	0
1859473	Floricoccus tropicus	0	0	0	0	0	0	0	0	0	0	0	0	0	0	0	0	0	0	0	0	0	0	0	0	0	0	0	0	0	0	0	0	0	0	0	0	0	0	0	0	0	0	0	0	0	0	0	0
322505	Sharpea azabuensis	0.00032	8e-05	1e-05	9e-05	1e-05	1e-05	4e-05	1e-05	3e-05	7e-05	1e-05	0.00061	0	0	0	0	0	0	1e-05	0.00012	2e-05	0.00381	0	0.00035	1e-05	0	0	0	0	0	0	0	0	0	1e-05	2e-05	8e-05	2e-05	1e-05	0.00061	0	0	0	0	0	0	0	0
1597	Lactobacillus paracasei	1e-05	0	1e-05	0	1e-05	1e-05	0	0	0	0	1e-05	0	0	0	0	0	0	0	0.00011	1e-05	0	0	0	0	0	0	0	0	0	0	0	0	0	0	0	1e-05	0	0	0	0	0	0	0	0	0	0	0	0
1613	Lactobacillus fermentum	1e-05	0	0	0	0	0	0	0	0	0	0	1e-05	0	0	0	0	0	0	0	0	0	0	0	0	0	0	0	0	0	0	0	0	0	0	0	0	0	0	0	0	0	0	0	0	0	0	0	0
1618	Lactobacillus mali	1e-05	0	0	0	0	0	0	0	0	0	0	0	0	0	0	0	0	0	0	0	0	0	0	0	0	0	0	0	0	0	0	0	0	0	0	0	0	0	0	0	0	0	0	0	0	0	0	0
60520	Lactobacillus paraplantarum	0	0	0	0	0	0	0	0	0	0	0	0	0	0	0	0	0	0	0	0	0	0	0	0	0	0	0	0	0	0	0	0	0	0	0	0	0	0	0	0	0	0	0	0	0	0	0	0
1601	Lactobacillus agilis	0	0	0	1e-05	0	0	0	0	0	0	0	0	0	0	0	0	0	0	0	0	0	0	0	0	0	0	0	0	0	2e-05	0	0	0	0	0	0	2e-05	0	1e-05	0	0	0	0	0	0	0	0	0
1584	Lactobacillus delbrueckii	0	0	0	1e-05	0	0	0	0	0	0	0	0	0	0	0	2e-05	0	6e-05	1e-05	0	0	0	0	0	0	0	6e-05	3e-05	0	0.00011	0.00018	0.00017	0.00011	0	0	0	2e-05	0	1e-05	0	6e-05	0.00013	0.00011	2e-05	4e-05	0	0.00014	0.00017
508451	Lactobacillus taiwanensis	0	0	0	0	0	0	0	0	0	0	0	0	0	0	0	0	0	0	0	0	0	0	0	0	0	0	0	0	0	0	0	0	0	0	0	0	0	0	0	0	0	0	0	0	0	0	0	0
1203069	Lactobacillus gigeriorum	0	0	0	0	0	0	0	0	0	0	0	0	0	0	0	0	0	0	0	0	1e-05	0	0	0	0	0	0	0	0	0	0	0	0	0	0	0	0	0	0	0	0	0	0	0	0	0	0	0
1604	Lactobacillus amylovorus	0	0	0	0	0	0	0	0	0	0	0	0	0	0	0	0	0	0	0	0	0	0	0	0	0	0	0	0	0	0	0	0	0	0	0	0	0	0	0	0	0	0	0	0	0	9e-05	0	0
1007676	Lactobacillus ginsenosidimutans	0	0	0	0	0	0	0	0	0	0	0	0	0	0	0	0	0	0	0	0	0	0	0	0	0	0	0	0	0	0	0	0	0	0	0	0	0	0	0	0	0	0	0	0	0	0	0	0
1623	Lactobacillus ruminis	0	2e-05	6e-05	0.00146	4e-05	6e-05	0.00102	7e-05	1e-05	0.00101	7e-05	1e-05	0	0	0	2e-05	0.00018	0	1e-05	2e-05	0.00031	0	0	4e-05	0.0001	0.00495	0	0	0	0	0	0	0	5e-05	1e-05	1e-05	0.00335	0	0	2e-05	0	0	0	0.00113	0	0	0	0
357278	Lactobacillus parabrevis	0	0	0	0	0	0	0	0	0	0	0	0	0	0	0	0	0	0	0	0	0	0	0	0	0	0	0	0	0	0	0	0	0	0	0	0	0	0	0	0	0	0	0	0	0	0	0	0
483011	Lactobacillus fabifermentans	0	0	0	0	0	0	0	0	0	0	0	0	0	0	0	0	0	0	0	0	0	0	0	0	0	0	0	0	0	0	0	0	0	0	0	0	0	0	0	0	0	0	0	0	0	0	0	0
1598	Lactobacillus reuteri	0	0	0	0	0	0	0	0	0	0	0	0	0	0	9e-05	0	0	0	0	0	0	0	0	0	0	0	0	3e-05	0	0	0	7e-05	4e-05	0	0	0	0	0	0	0	5e-05	0	0	3e-05	3e-05	0	0	0
1670446	Lactobacillus herbarum	0	0	0	0	0	0	0	0	0	0	0	0	0	0	0	0	0	0	0	0	0	0	0	0	0	0	0	0	0	0	0	0	0	0	0	0	0	0	0	0	0	0	0	0	0	0	0	0
231049	Lactobacillus rossiae	0	0	0	0	0	0	0	0	0	0	0	0	0	0	0	0	0	0	0	0	0	0	0	0	0	0	0	0	0	0	0	0	0	0	0	0	0	0	0	0	0	0	0	0	0	0	0	0
1450649	Lactobacillus gorillae	0	0	0	0	0	0	0	0	0	0	0	0	0	0	0	0	0	0	0	0	0	1e-05	0	0	0	0	0	0	0	0	0	0	0	0	0	0	0	0	0	0	0	0	0	0	0	0	0	0
52242	Lactobacillus gallinarum	0	0	0	0	0	0	0	0	0	0	0	0	0	0	0	0	0	0	0	2e-05	0	0	0	0	0	0	0	0	0	0	0	0	0	0	0	1e-05	0	0	0	0	0	0	0	0	0	0	0	3e-05
1590	Lactobacillus plantarum	0	0	0	0	0	0	0	0	0	0	0	0	0	0	0	0	0	0	0	0	0	0	0	0	0	0	0	0	0	0	0	0	0	0	0	0	5e-05	0	0	0	0	0	0	0	0	0	0	0
109790	Lactobacillus jensenii	0	0	0	0	0	0	0	0	0	0	0	0	0	0	0	0	0	0	0	0	0	0	0	0	0	0	0	0	0	0	0	0	0	0	0	0	0	0	0	0	0	0	0	0	0	0	0	0
390842	Lactobacillus parafarraginis	0	0	0	0	0	0	0	0	0	0	0	0	0	0	0	0	0	0	0	0	0	0	0	1e-05	0	0	0	0	0	0	0	0	0	0	0	0	0	0	0	0	0	0	0	0	0	0	0	0
147802	Lactobacillus iners	0	0	0	0	0	0	0	0	0	0	0	0	0	0	0	4e-05	0	0	0	0	0	0	0	0	0	0	0	0	0	0	0	0	0	0	0	0	0	0	0	0	0	0	1e-05	0	0	0	0	0
993692	Lactobacillus kimchiensis	0	0	0	0	0	0	0	0	0	0	0	0	0	0	0	0	0	0	0	0	0	0	0	0	0	0	0	0	0	0	0	0	0	0	0	0	0	0	0	0	0	0	0	0	0	0	0	0
148604	Lactobacillus ingluviei	0	0	0	0	0	0	0	0	0	0	0	0	0	0	0	0	0	0	0	0	0	0	0	0	0	0	0	0	0	0	0	0	0	0	0	0	0	0	0	0	0	0	0	0	0	0	0	0
1074467	Lactobacillus heilongjiangensis	0	0	0	0	0	0	0	0	0	0	0	0	0	0	0	0	0	0	0	0	0	0	0	0	0	0	0	0	0	0	0	0	0	0	0	0	0	0	0	0	0	0	0	0	0	0	0	0
105612	Lactobacillus algidus	0	0	0	0	0	0	0	0	0	0	0	0	0	0	0	0	0	0	0	0	0	0	0	0	0	0	0	0	0	0	0	0	0	0	0	0	0	0	0	0	0	0	0	0	0	0	0.00033	0
1202668	Lactobacillus oryzae	0	0	0	0	0	0	0	0	0	0	0	0	0	0	0	0	0	0	0	0	0	0	0	0	0	0	0	0	0	0	0	0	0	0	0	0	0	0	0	0	0	0	0	0	0	0	0	0
89059	Lactobacillus acidipiscis	0	0	0	0	0	0	0	0	0	0	0	0	0	0	0	0	0	0	0	0	0	0	0	0	0	0	0	0	0	0	0	0	0	0	0	0	0	0	0	0	0	0	0	0	0	0	0	0
83526	Lactobacillus paralimentarius	0	0	0	0	0	0	0	0	0	0	0	0	0	0	0	0	0	0	0	0	0	0	0	0	0	0	0	0	0	0	0	0	0	0	0	0	0	0	0	0	0	0	0	0	0	0	0	0
399370	Lactobacillus ghanensis	0	0	0	0	0	0	0	0	0	0	0	0	0	0	0	0	0	0	0	0	0	0	0	0	0	0	0	0	0	0	0	0	0	0	0	0	0	0	0	0	0	0	0	0	0	0	0	0
944671	Lactobacillus nasuensis	0	0	0	0	0	0	0	0	0	0	0	0	0	0	0	0	0	0	0	0	0	0	0	0	0	0	0	0	0	0	0	0	0	0	0	0	0	0	0	0	0	0	0	0	0	0	0	0
151781	Lactobacillus intestinalis	0	0	0	0	0	0	0	0	0	0	0	0	0	0	0	0	0	0	0	0	0	0	0	0	0	0	0	0	0	0	0	0	0	0	0	0	0	0	0	0	0	0	0	0	0	0	0	0
152335	Lactobacillus suebicus	0	0	0	0	0	0	0	0	0	0	0	0	0	0	0	0	0	0	0	0	0	0	0	0	0	0	0	0	0	0	0	0	0	0	0	0	0	0	0	0	0	0	0	0	0	0	0	0
171523	Lactobacillus pantheris	0	0	0	0	0	0	0	0	0	0	0	0	0	0	0	0	0	0	0	0	0	0	0	0	0	0	0	0	0	0	0	0	0	0	0	0	0	0	0	0	0	0	0	0	0	0	0	0
381741	Lactobacillus thailandensis	0	0	0	0	0	0	0	0	0	0	0	0	0	0	0	0	0	0	0	0	0	0	0	0	0	0	0	0	0	0	0	0	0	0	0	0	0	0	0	0	0	0	0	0	0	0	0	0
227942	Lactobacillus gastricus	0	0	0	0	0	0	0	0	0	0	0	0	0	0	0	0	0	0	0	0	0	0	0	0	0	0	0	0	0	0	0	0	0	0	0	0	0	0	0	0	0	0	0	0	0	0	0	0
227944	Lactobacillus kalixensis	0	0	0	0	0	0	0	0	0	0	0	0	0	0	0	0	0	0	0	0	0	0	0	0	0	0	0	0	0	0	0	0	0	0	0	0	0	0	0	0	0	0	0	0	0	0	0	0
481722	Lactobacillus kisonensis	0	0	0	0	0	0	0	0	0	0	0	0	0	0	0	0	0	0	0	0	0	0	0	0	0	0	0	0	0	0	0	0	0	0	0	0	0	0	0	0	0	0	0	0	0	0	0	0
481720	Lactobacillus otakiensis	0	0	0	0	0	0	0	0	0	0	0	0	0	0	0	0	0	0	0	0	0	0	0	0	0	0	0	0	0	0	0	0	0	0	0	0	0	0	0	0	0	0	0	0	0	0	0	0
468911	Lactobacillus hordei	0	0	0	0	0	0	0	0	0	0	0	0	0	0	0	0	0	0	0	0	0	0	0	0	0	0	0	0	0	0	0	0	0	0	0	0	0	0	0	0	0	0	0	0	0	0	0	0
303241	Lactobacillus oeni	0	0	0	0	0	0	0	0	0	0	0	0	0	0	0	0	0	0	0	0	0	0	0	0	0	0	0	0	0	0	0	0	0	0	0	0	0	0	0	0	0	0	0	0	0	0	0	0
414682	Lactobacillus similis	0	0	0	0	0	0	0	0	0	0	0	0	0	0	0	0	0	0	0	0	0	0	0	0	0	0	0	0	0	0	0	0	0	0	0	0	0	0	0	0	0	0	0	0	0	0	0	0
53444	Lactobacillus lindneri	0	0	0	0	0	0	0	0	0	0	0	0	0	0	0	0	0	0	0	0	0	0	0	0	0	0	0	0	0.0001	0	0	0	0	0	0	0	0	0	0	0	0	4e-05	1e-05	0	0	0	0	2e-05
1581	Lactobacillus buchneri	0	0	0	0	0	0	0	0	0	0	0	0	0	0	0	0	0	0	0	0	0	0	0	0	0	0	0	0	0	0	0	0	0	0	0	0	0	0	0	0	0	0	0	0	0	0	0	0
1602	Lactobacillus alimentarius	0	0	0	0	0	0	0	0	0	0	0	0	0	0	0	0	0	0	0	0	0	0	0	0	0	0	0	0	0	0	0	0	0	0	0	0	0	0	0	0	0	0	0	0	0	0	0	0
1714681	Lactobacillus silagincola	0	0	0	0	0	0	0	0	0	0	0	0	0	0	0	0	0	0	0	0	0	0	0	0	0	0	0	0	0	0	0	0	0	0	0	0	0	0	0	0	0	0	0	0	0	0	0	0
1610	Lactobacillus coryniformis	0	0	0	1e-05	0	0	0	0	0	0	0	0	0	0	0	0	0	0	1e-05	1e-05	0	1e-05	0	0	0	0	0	0	0	0	0	0	0	0	0	0	1e-05	0	0	0	0	0	0	0	0	0	0	0
1612	Lactobacillus farciminis	0	0	0	0	0	0	0	0	0	0	0	0	0	0	0	0	0	0	0	0	0	0	0	0	0	0	0	0	0	0	0	0	0	0	0	0	0	0	0	0	0	0	0	0	0	0	0	0
1435342	Lactobacillus mixtipabuli	0	0	0	0	0	0	0	0	0	0	0	0	0	0	0	0	0	0	0	0	0	0	0	0	0	0	0	0	0	0	0	0	0	0	0	0	0	0	0	0	0	0	0	0	0	0	0	0
1632	Lactobacillus oris	0	0	1e-05	0	0	0	1e-05	0	0	0	1e-05	0	0	0	0	0	0	0	0	0	0	0	0	0	0	0	0	0	0	0	0	0	0	0	0	0	0	0	0	0	0	0	0	0	0	0	0	0
28038	Lactobacillus curvatus	0	0	0	0	2e-05	2e-05	0	0	0	0	0	0	0	0	0	0	0	0	0	0	0	0	0	0	0	0	0	0	0	0	0	0	0	0	0	0	0	0	0	0	0	0	0	0	0	0	0	0
1231337	Lactobacillus shenzhenensis	0	0	0	0	0	0	0	0	0	0	0	0	0	0	0	0	0	0	0	0	0	0	0	0	0	0	0	0	0	0	0	0	0	0	0	0	1e-05	0	1e-05	0	0	0	0	0	0	0	0	0
60519	Lactobacillus graminis	0	0	0	0	0	0	0	0	0	0	0	0	0	0	0	0	0	0	0	0	0	0	0	0	0	0	0	0	0	0	0	0	0	0	0	0	0	0	0	0	0	0	0	0	0	0	0	0
47770	Lactobacillus crispatus	0	0	0	0	0	0	0	0	0	0	0	0	0	0	0	0	0	0	0	0	0	0	0	0	0	0	0	0	0	0	0	0	0	0	0	0	0	0	0	0	0	0	0	0	0	0	0	0
51664	Lactobacillus dextrinicus	0	0	0	0	0	0	0	0	0	0	0	0	0	0	0	0	0	0	0	0	0	0	0	0	0	0	0	0	0	0	0	0	0	0	0	0	0	0	0	0	0	0	0	0	0	0	0	0
47715	Lactobacillus rhamnosus	0	0	0	0	0	0	0	0	0	0	0	0	0	0	0	0	0	0	0	0	0	0	0	0	0	0	0	0	0	0	0	0	0	0	0	0	0	0	0	0	0	0	0	0	0	0	0	0
114090	Pediococcus inopinatus	0	0	0	0.00013	1e-05	1e-05	1e-05	0	0	0	0	1e-05	0	0	0	0	0	0	0	0	1e-05	0	0	1e-05	0	0	0	0	0	0	0	0	0	0	1e-05	1e-05	7e-05	0	3e-05	0	0	0	0	0	0	0	0	0
51663	Pediococcus damnosus	0	0	0	0	0	0	0	0	0	0	0	0	0	0	0	0	0	0	0	1e-05	0	0	0	0	0	0	0	0	0	0	0	0	0	0	0	0	0	0	0	0	0	0	0	0	0	0	0	0
1952194	Lactobacillaceae bacterium UBA5810	0	0	0	0	0	0	0	0	0	0	0	0	0	0	0	0	0	0	0	0	0	0	0	0	0	0	0	0	0	0	0	0	0	0	0	0	0	0	0	0	0	0	0	0	0	0	0	0
1834193	Enterococcus sp. 9E7_DIV0242	9e-05	7e-05	6e-05	0.0002	5e-05	0.00013	7e-05	3e-05	3e-05	5e-05	9e-05	0.00027	0	0	0	0	0	0	4e-05	8e-05	8e-05	4e-05	0	9e-05	6e-05	0	0	0	0	0	0	0	0	3e-05	3e-05	0.00015	0.00014	3e-05	6e-05	3e-05	0	0	0	0	0	0	0	0
1834178	Enterococcus sp. 3H8_DIV0648	8e-05	7e-05	6e-05	0.0002	5e-05	0.00011	6e-05	3e-05	4e-05	4e-05	8e-05	0.00028	0	0	0	0	0	0	4e-05	8e-05	8e-05	4e-05	0	9e-05	6e-05	0	0	0	0	0	0	0	0	4e-05	3e-05	0.00015	0.00015	3e-05	7e-05	3e-05	0	0	0	0	0	0	0	0
1987383	Enterococcus sp. 10A9_DIV0425	4e-05	3e-05	3e-05	8e-05	2e-05	4e-05	3e-05	1e-05	2e-05	2e-05	4e-05	0.00017	0	0	0	0	0	0	2e-05	3e-05	4e-05	2e-05	0	4e-05	2e-05	0	0	0	0	0	0	0	0	1e-05	1e-05	7e-05	7e-05	2e-05	4e-05	1e-05	0	0	0	0	0	0	0	0
1834167	Enterococcus sp. 12C11_DIV0727	4e-05	3e-05	3e-05	9e-05	2e-05	5e-05	3e-05	1e-05	1e-05	2e-05	4e-05	0.00017	0	0	0	0	0	0	2e-05	4e-05	3e-05	2e-05	0	4e-05	2e-05	0	0	0	0	0	0	0	0	1e-05	1e-05	6e-05	7e-05	1e-05	3e-05	1e-05	0	0	0	0	0	0	0	0
1834192	Enterococcus sp. 9D6_DIV0238	3e-05	3e-05	2e-05	7e-05	2e-05	4e-05	2e-05	1e-05	2e-05	2e-05	3e-05	0.0001	0	0	0	0	0	0	2e-05	3e-05	3e-05	2e-05	0	3e-05	2e-05	0	0	0	0	0	0	0	0	1e-05	1e-05	5e-05	5e-05	1e-05	3e-05	1e-05	0	0	0	0	0	0	0	0
1355	Enterococcus columbae	2e-05	1e-05	0	0	1e-05	0	0	0	0	0	0	0	0	0	0	0	0	0	0	2e-05	1e-05	0	0	1e-05	0	0	0	0	0.0004	0	0	0	0	0	0	0	0	0	0	0	0	0	0	0	0	0	0	0
1987385	Enterococcus sp. 6C8_DIV0013	1e-05	1e-05	1e-05	2e-05	0	1e-05	1e-05	0	0	1e-05	1e-05	5e-05	0	0	0	0	0	0	0	1e-05	1e-05	1e-05	0	1e-05	1e-05	0	0	0	0	0	0	0	0	0	0	2e-05	2e-05	0	1e-05	0	0	0	0	0	0	0	0	0
1834191	Enterococcus sp. 8G7_MSG3316	1e-05	1e-05	0	1e-05	0	1e-05	0	0	0	0	0	1e-05	0	0	0	0	0	0	0	1e-05	0	0	0	0	0	0	0	0	0	0	0	0	0	0	0	1e-05	1e-05	0	1e-05	0	0	0	0	0	0	0	0	0
1834181	Enterococcus sp. 4G2_DIV0659	1e-05	1e-05	0	3e-05	0	1e-05	0	0	0	0	1e-05	3e-05	0	0	0	0	0	0	0	1e-05	0	0	0	1e-05	1e-05	0	0	0	0	0	0	0	0	0	0	1e-05	6e-05	0	3e-05	0	0	0	0	3e-05	0	0	0	0
1834189	Enterococcus sp. 7F3_DIV0205	1e-05	1e-05	0	1e-05	0	1e-05	0	0	0	0	0	2e-05	0	0	0	0	0	0	0	0	0	0	0	0	0	0	0	0	0	0	0	0	0	0	0	1e-05	1e-05	0	0	0	0	0	0	0	0	0	0	0
1351	Enterococcus faecalis	0	0.00015	0	0	0	0	0	1e-05	1e-05	0	1e-05	0	0	0	0	0	0	0	1e-05	1e-05	1e-05	0	0	6e-05	1e-05	0	0	0	0	0	0	0	0	0	1e-05	0	0	1e-05	0	0	0	0	0	0	0	0	0	0
155617	Enterococcus moraviensis	0	0	0	0	0	0	0	0	0	0	0	0	0	0	0	0	0	0	0	0	0	0	0	0	0	0	0	0	0	0	0	0	0	0	0	0	0	0	0	0	0	0	0	0	0	0	0	0
1352	Enterococcus faecium	0	0.00042	0	0	1e-05	0	0	1e-05	0	1e-05	1e-05	1e-05	0	0	0	0	0	0	1e-05	1e-05	1e-05	1e-05	0	3e-05	0	0	0	0	0	0	0	0	0	0	0	0	0.00016	0	0	0	0	0	0	0	0	0	0	0
762845	Enterococcus rivorum	0	1e-05	0	0	0	0	0	0	0	0	0	0	0	0	0	0	0	0	0	0	0	0	0	0	0	0	0	0	0	0	0	0	0	0	0	0	0	0	0	0	0	0	0	0	0	0	0	0
328396	Enterococcus aquimarinus	0	0	0	0	0	0	0	0	0	0	0	0	0	0	0	0	0	0	0	0	0	0	0	0	0	0	0	0	0	0	0	0	0	0	0	0	0	0	0	0	0	0	0	0	0	0	0	0
53346	Enterococcus mundtii	0	0	0	0	0	0	0	0	0	0	0	0	0	0	0	0	0	0	0	0	0	0	0	0	0	0	0	0	0	0	0	0	0	0	0	0	0	0	0	0	0	0	0	0	0	0	0	0
53345	Enterococcus durans	0	0	0	0	0	0	0	0	0	0	0	0	0	0	0	0	0	0	0	0	0	0	0	1e-05	0	0	0	0	0	0	0	0	0	0	0	0	0	0	0	0	0	0	0	0	0	0	0	0
1077675	Enterococcus plantarum	0	0	0	0	0	0	0	0	0	0	0	0	0	0	0	0	0	0	0	0	0	0	0	0	0	0	0	0	0	0	0	0	0	0	0	0	0	0	0	0	0	0	0	0	0	0	0	0
214095	Enterococcus canis	0	0	0	0	0	0	0	0	0	0	0	0	0	0	0	0	0	0	0	0	0	0	0	0	0	0	0	0	0	0	0	0	0	0	0	0	0	0	0	0	0	0	0	0	0	0	0	0
160453	Enterococcus gilvus	0	0	0	0	0	0	0	0	0	0	0	0	0	0	0	0	0	0	0	0	0	0	0	0	0	0	0	0	0	0	0	0	0	0	0	0	0	0	0	0	0	0	0	0	0	0	0	0
1353	Enterococcus gallinarum	0	0	0	0	0	0	0	0	0	0	0	0	0	0	0	0	0	0.00028	0	1e-05	1e-05	0	0	0	4e-05	0	0	0	0	3e-05	0	0.00011	0	2e-05	0	1e-05	0	0	1e-05	0	0	0	0	9e-05	0	0	0	0
1356	Enterococcus sulfureus	0	0	0	0	0	0	0	0	0	0	0	0	0	0	0	0.00075	0	0	0	0	0	0	0	0	0	0	0	0	0	0	0	0.00015	0	0	0	1e-05	0	0	0	0	0	0	0	0	0	0	0	0
2005703	Enterococcus wangshanyuanii	0	0	0	0	0	0	0	0	0	0	0	0	0	0	0	0	0	0	0	0	0	0	0	0	0	0	0	0	0	0	0	0	0	0	0	0	0	0	0	0	0	0	0	0	0	0	0	0
1987386	Enterococcus sp. 5B7_DIV0075	2e-05	1e-05	1e-05	4e-05	1e-05	2e-05	1e-05	1e-05	1e-05	1e-05	1e-05	0	0	0	0	0	0	0	1e-05	1e-05	2e-05	1e-05	0	4e-05	1e-05	0	0	0	0	0	0	0	0	0	1e-05	3e-05	4e-05	0	2e-05	1e-05	0	0	0	0	0	0	0	0
44007	Enterococcus pseudoavium	0	0	0	0	0	0	0	0	0	0	0	0	0	0	0	0	0	0	0	0	0	0	0	0	0	0	0	0	0	0	0	0	0	0	0	0	0	0	0	0	0	0	0	0	0	0	0	0
112904	Enterococcus villorum	0	0	0	1e-05	0	0	0	0	0	0	0	0	0	0	0	0	0	0	0	0	0	0	0	0	0	0	0	0	7e-05	0	0	0	0	0	0	0	1e-05	0	0	0	0	0	0	0	0	0	0	0
71452	Enterococcus raffinosus	0	0	1e-05	1e-05	0	1e-05	0	0	0	0	0	0	0	0	0	0	0	0	0	0	0	0	0	0	0	0	0	0	0	0	0	0	0	0	0	0	1e-05	0	1e-05	0	0	0	0	0	0	0	0	0
64642	Tetragenococcus muriaticus	0	0	0	0	0	0	0	0	0	0	0	0	0	0	0	0	0	0	0	0	0	0	0	0	0	0	0	0	0	0	0	0	0	0	0	0	0	0	0	0	0	0	0	0	0	0	0	0
71453	Tetragenococcus solitarius	0	0	0	1e-05	0	0	0	0	0	0	0	0	0	0	0	0	0	0	0	0	0	0	0	0	0	0	0	0	0	0	0	0	0	0	0	0	1e-05	0	0	0	0	0	0	0	0	0	0	0
519472	Vagococcus teuberi	0	0	0	0	0	0	0	0	0	0	0	0	0	0	0	0	0	0	0	0	0	0	0	0	0	0	0	0	0	0	0	0	0	0	0	0	0	0	0	0	0	0	0	0	0	0	0	0
1768210	Vagococcus martis	0	0	0	0	0	0	0	0	0	0	0	0	0.00015	2e-05	2e-05	0.00035	0.00022	0	0	0	0	0	0	0	0	0	5e-05	3e-05	0	0	2e-05	0	6e-05	0	0	0	0	0	0	0	5e-05	0.00016	1e-05	0.00038	0	0	0.0001	0
33970	Melissococcus plutonius	0	0	0	0	0	0	0	0	0	0	0	0	0	0	0	0	0	0	0	0	0	0	0	0	0	0	0	0	0	0	0	0	0	0	0	0	0	0	0	0	0	0	0	0	0	0	0	0
263852	Pilibacter termitis	0	0	0	0	0	0	0	0	0	0	0	0	0	0	0	0	0	0	0	0	0	0	0	0	0	0	0	0	0	0	0	0	0	0	0	0	0	0	0	0	0	0	0	0	0	0	0	0
1637505	Carnobacterium sp. N15.MGS-251	0.00081	0.00091	0.00397	0.00099	0.00106	0.00689	0.00405	0.00174	0.0017	0.00139	0.01425	0.00067	0.05156	0.02007	0.03733	0.01245	0.02651	0.01978	0.00056	0.00109	0.0015	0.00096	0	0.00222	0.00143	0.04053	0.04821	0.01418	0.00207	0.03093	0.08503	0.01355	0.0912	0.00039	0.00195	0.00081	0.0009	0.0005	0.0004	0.00136	0.00276	0.04034	0.06645	0.02918	0.03221	0.04617	0.0438	0.01393
2751	Carnobacterium maltaromaticum	8e-05	5e-05	1e-05	1e-05	0.00026	3e-05	5e-05	0.00015	2e-05	1e-05	1e-05	0	0	0	6e-05	0.00011	0.00018	0.00015	0	5e-05	3e-05	0	0	2e-05	1e-05	7e-05	6e-05	0	0	0	0	4e-05	7e-05	0	3e-05	2e-05	1e-05	0	9e-05	0	0	7e-05	6e-05	0.00015	0.00018	0	9e-05	0.00011
147709	Carnobacterium inhibens	0	0	0	0	0	0	0	0	0	0	0	0	0	0	0	0	0	0	0	0	0	0	0	0	0	0	0	0	0	0	0	0	0	0	0	0	0	0	0	0	0	0	0	0	0	0	0	0
1946232	Carnobacterium sp. UBA5792	0	0	0	0	0	0	0	0	0	0	0	0	0	0	0	0	0	0	0	0	0	0	0	0	0	0	0	0	0	0	0	0	0	0	0	0	0	0	0	0	0	0	0	0	0	0	0	0
2749	Carnobacterium gallinarum	0	0	0	0	0	0	0	0	0	0	0	0	0	0	0	0	0	0	0	0	1e-05	0	0	0	0	0	0	0	0	0	0	0	0	0	0	0	0	0	0	0	0	0	0	0	0	0	0	0
28230	Carnobacterium alterfunditum	0	0	0	0	0	0	0	0	0	0	0	0	0	0	0	0	0	0	0	0	0	0	0	0	0	0	0	0	0	0	0	0	0	0	0	0	0	0	0	0	0	0	0	0	0	0	0	0
2748	Carnobacterium divergens	0	1e-05	0	0	2e-05	0	0	0	0	0	0	0	0	0	0	0	0	0	0	3e-05	0	0	0	0	0	0	0	0	0	0	0	0	0	0	0	0	0	0	0	0	0	0	0	0	0	0	0	0
137733	Granulicatella balaenopterae	0	0	0	0	0	0	0	0	0	0	0	0	0	0	0	0	0	0	0	0	0	0	0	0	0	0	0	0	0	0	0	0	0	0	0	0	0	0	0	0	0	0	0	0	0	0	0	0
137732	Granulicatella elegans	0	0	1e-05	0	0	1e-05	0	3e-05	0	0	1e-05	0	0	0	0	0	0	0	0	1e-05	0	0	0	0	0	0	0	0	0	0	0	0	0	0	1e-05	1e-05	0	0	0	0	0	0	0	0	0	0	0	0
1725361	Granulicatella sp. 572.rep1_STHE	5e-05	0	0	0	0	0	0	0	0	0	0	0	0	0	0	0	0	0	0	1e-05	1e-05	0	0	0	0	0	0	0	0	0	0	0	0	0	0	0	0	0	2e-05	0	0	0	0	0	0	0	0	0
43064	Trichococcus pasteurii	0	0	0	0	0	0	0	0	0	0	0	0	0	0	0	0	0	0	0	0	0	0	0	0	0	0	0	0	0	0	0	0	0	0	0	0	0	0	0	0	0	0	0	0	0	0	0	0
82803	Trichococcus flocculiformis	0	0	0	0	0	0	0	0	0	0	0	0	0	0	0	0	0	0	0	0	0	0	0	0	0	0	0	0	0	0	0	0	0	0	0	0	0	0	0	0	0	0	0	0	0	0	0	0
140314	Trichococcus palustris	0	0	0	0	0	0	0	0	0	0	0	0	0	0	0	0	0	0	0	0	0	0	0	0	0	0	0	0	0	0	0	0	0	0	0	0	0	0	0	0	0	0	0	0	0	0	0	0
872292	Trichococcus sp. ES5	0	0	0	0	0	0	0	0	0	0	0	0	0	0	0	0	0	0	0	0	0	0	0	0	0	0	0	0	0	0	0	0	0	0	0	0	0	0	0	0	0	0	0	0	0	0	0	0
745365	Pisciglobus halotolerans	0	0	0	0	0	0	0	0	0	0	0	0	0	0	0	0	0	0	0	0	0	0	0	0	0	0	0	0	0	0	0	0	0	0	0	0	0	0	0	0	0	0	0	0	0	0	0	0
426701	Alkalibacterium thalassium	0	0	0	0	0	0	0	0	0	0	0	0	0	0	0	0	0	0	0	0	0	0	0	0	0	0	0	0	0	0	0	0	0	0	0	0	0	0	0	0	0	0	0	0	0	0	0	0
426703	Alkalibacterium putridalgicola	0	0	0	1e-05	0	0	0	0	0	0	0	0	0	0	0	0	0	0	1e-05	0	0	0	0	0	0	0	0	0	0	0	0	0	0	0	0	0	0	0	0	0	0	0	0	0	0	0	0	0
1130080	Alkalibacterium gilvum	0	0	0	0	0	0	0	0	0	0	0	0	0	0	0	0	0	0	0	0	0	0	0	0	0	0	0	0	0	0	0	0	0	0	0	0	0	0	0	0	0	0	0	0	0	0	0	0
708126	Jeotgalibaca dankookensis	0	0	0	1e-05	0	0	0	0	0	0	0	1e-05	0	0	0	0	0	0	0	0	0	0	0	0	0	0	4e-05	0	0	0	0	0	0	0	0	0	1e-05	0	0	0	0	8e-05	0	0	0	0	2e-05	0.00021
191770	Marinilactibacillus psychrotolerans	0	0	0	0	0	0	0	0	0	0	0	0	0	0	0	0	0	0	0	0	0	0	0	0	0	0	0	0	0	0	0	0	0	0	0	0	0	0	0	0	0	0	0	0	0	0	0	0
142588	Isobaculum melis	0	0	0	0	0	0	0	0	0	0	0	0	0	0	0	0	0	0	0	0	0	0	0	0	0	0	0	0	0	0	0	0	0	0	0	0	0	0	0	0	0	0	0	0	0	0	0	0
136492	Atopobacter phocae	0	0	0	0	0	0	0	0	0	0	0	0	0	0	0	0	0	0	0	0	0	0	0	0	0	0	0	0	0	0	0	0	0	0	0	0	0	0	0	0	0	0	0	0	0	0	0	0
180295	Atopostipes suicloacalis	0	0	0	0	0	0	0	0	0	0	0	0	0	0	0	0	0	0	0	0	0	0	0	0	0	0	0	0	0	0	0	0.00022	0	0	0	0	0	0	0	0	0	0.00048	0	0	0	0	0	0.00528
29394	Dolosigranulum pigrum	0	0	0	0	0	0	0	0	0	0	0	0	0.00035	0	0.00038	0.00065	4e-05	8e-05	0	0	0	0	0	0	0	0	9e-05	0	0	0	8e-05	0.00031	9e-05	0	0	0	0	0	0	0	0	4e-05	0	0	5e-05	0.00014	2e-05	4e-05
46256	Weissella hellenica	7e-05	0	0	1e-05	0	9e-05	0	0	0	0	0	2e-05	0	0	0	0	0	0	0	0	0	0	0	1e-05	0	0	0	0	0	0	0	0	0.00052	0	0	0	0	0	0	0	0	0	0	0	0	0	0	0
1249	Weissella paramesenteroides	0	0	0	0	0	0	0	0	0	0	0	0	0	0.00046	0	0	0	0	0	0	0	0	0	0	0	0	0	0	0	0	0	0	0	0	0	0	0	0	0	0	0	0.00041	0	0	0	0	0	0
165096	Weissella koreensis	0	0	0	0	0	0	0	0	0	0	0	0	0.00026	0	0	0	0.00495	0	0	0	0	0	0	0	0	0	0.00025	6e-05	0	0	0.00022	0	0.00043	0	0	0	0	0	0	0	0	0	0.00058	0	0	0.00024	0.00016	0
1629	Weissella viridescens	0	0	0	0	0	0	0	0	0	0	0	0	0	0	0	0	0	0	0	0	0	0	0	0	0	0	0	0	0	0	0	0	0	0	0	0	0	0	0	0	0	0	0	0	0	0	0	0
1505725	Weissella bombi	0	0	0	0	0	0	0	0	0	0	0	0	0	0	0	0	0	0	0	0	0	0	0	0	0	0	0	0	0	0	0	0	0	0	0	0	0	0	0	0	0	0	0	0	0	0	0	0
1631871	Weissella jogaejeotgali	0	0	0	0	0	0	0	0	0	0	0	0	0	0	0	0	0	0	0	0	0	0	0	0	0	0	0	0	0	0	0	0	0	0	0	0	0	0	0	0	0	0	0	0	0	0	0	0
1252	Leuconostoc carnosum	0	0	0	0	0	0.00032	0	0	0	0	0	0	0	0	0	0	0	0	0	1e-05	0	0	0	0	0	0	0	0	0	0	0	0	0	0	0	0	0	0	0	0	0	0	0	0	0	0	0.00056	0
1251	Leuconostoc fallax	0	0	0	0	0	0	0	0	0	0	0	0	0	0	0	0	0	0	0	0	0	0	0	0	0	0	0	0	0	0	0	0	0	0	0	0	0	0	0	0	0	0	0	0	0	0	0	0
33968	Leuconostoc pseudomesenteroides	0	0	0	1e-05	0	0	0	0	0	0	0	0	0	0	0	0	0	0	0	1e-05	0	0	0	0	0	0	0	0	0	0	0	0	0	0	0	0	1e-05	0	0	0	0	0	0	0	0	0	0	0
157463	Fructobacillus ficulneus	0	0	0	0	0	0	0	0	0	0	0	0	0	0	0	0	0	0	0	0	0	0	0	0	0	0	0	0	0	0	0	0	0	0	0	0	0	0	0	0	0	0	0	0	0	0	0	0
220714	Fructobacillus pseudoficulneus	0	0	0	0	0	0	0	0	0	0	0	0	0	0	0	0	0	0	0	0	0	0	0	0	0	0	0	0	0	0	0	0	0	0	0	0	0	0	0	0	0	0	0	0	0	0	0	0
1247	Oenococcus oeni	0	0	0	0	0	0	0	0	0	0	0	0	0	0	0	0	0	0	0	0	0	0	0	1e-05	0	0	0	0	0	0	0	0	0	0	0	0	0	0	0	0	0	0	1e-05	0	0	0	0	0
84521	Dolosicoccus paucivorans	0	0	0	0	0	0	0	0	0	0	0	0	0	0	0	0	0	0	0	0	0	0	0	0	0	0.00041	0.00017	0	0	0.00787	0	2e-05	0	0	0	0	0	0	0	0	0	0.00653	0	0.0001	0.00014	0	5e-05	0
13076	Globicatella sanguinis	0	0	0	0	0	0	0	0	0	0	0	0	0	0	0	0	0	0	0	0	0	0	0	0	0	0	0	0	0	0	0	0	0	0	0	0	0	0	0	0	0	0	0	0	0	0	0	0.00403
136093	Globicatella sulfidifaciens	0	0	0	0	0	0	0	0	0	0	0	0	0	0	0	0	0	0	0	0	0	0	0	0	0	0	0	0	0	0	0	0	0	0	0	0	0	0	0	0	0	0	0	0	0	0	0	0
1739315	Globicatella sp. HMSC072A10	0	0	0	0	0	0	0	0	0	0	0	0	0	0	0	0	0	0	0	0	0	0	0	0	0	0	0	0	0	0	0	0	0	0	0	0	0	0	0	0	0	0	0	0	0	0	0	0
88132	Eremococcus coleocola	0	0	0	0	0	0	0	0	0	0	0	0	0	0	0	0	0	0	0	0	0	0	0	0	0	0	0	0	0	0	0	0	0	0	0	0	0	0	0	0	0	0	0	0	0	0	0	0
1377	Aerococcus viridans	0	0	0	0	0	0	0	0	0	0	0	0	0	0	0	0	0	0	0	0	0	0	0	0	0	0	0	0	0	0	0	0	0	0	0	0	0	0	0	0	0	0	0	0	0	0	0	0
1981982	Aerococcus sp. 1KP-2016	0	0	0	0	0	0	0	0	0	0	0	0	0	0	0	0	0	0	0	0	0	0	0	0	0	0	0	0	0	0	0	0	0	0	0	0	0	0	0	0	0	0	0	0	0	0	0	0
82347	Facklamia languida	0	0	0	0	0	0	0	0	0	0	0	0	0.00011	0	4e-05	2e-05	0	0	0	0	0.00013	0	0	1e-05	0	4e-05	0	0	0	0	0	4e-05	5e-05	0	0	0	0	0	0	0	0	0	0	4e-05	0	3e-05	2e-05	0
46125	Abiotrophia defectiva	0	0	0	0	0	0	0	0	0	0	0	0	0	0	0	0	0	0	1e-05	0	0	0	0	0	0	0	0	0	0	0	0	0	0	0	1e-05	0	1e-05	0	0	0	0	0	0	0	0	0	0	0
89093	Ignavigranum ruoffiae	0	0	0	0	0	0	0	0	0	0	0	0	0	0	0	0	4e-05	3e-05	0	0	0	0	0	0	0	0	8e-05	0	0	0.00024	7e-05	2e-05	2e-05	0	0	0	0	0	0	0	0	0.00015	2e-05	4e-05	5e-05	0	5e-05	6e-05
33935	Lysinibacillus macroides	0.00057	0.00017	0	0	0	0	0	0	0	0	0	0	0	0	0	0	0	0	0	0.00014	0	0	0	0	0	0	0	0	0	0	0	0	0	0	0	0	0	0	0	0	0	0	0	0	0	0	0	0
1889781	Lysinibacillus sp. AR18-8	3e-05	2e-05	2e-05	7e-05	9e-05	3e-05	2e-05	1e-05	1e-05	2e-05	3e-05	0.00018	0	0	0	0	0	0	2e-05	3e-05	3e-05	2e-05	0	4e-05	2e-05	0	0	0	0	0	0	0	0	1e-05	1e-05	5e-05	6e-05	1e-05	3e-05	1e-05	0	0	0	0	0	0	0	0
1704289	Lysinibacillus sp. FJAT-14745	0	0	0	0	0	0	0	0	0	0	0	0	0	0	0	0	0	0	0	0	0	0	0	0	0	0	0	0	0	0	0	0	0	0	0	0	0	0	0	0	0	0	0	0	0	0	0	0
614648	Lysinibacillus xyleni	0	0	0	0	0	0	0	0	0	0	0	0	0	0	0	0	0	0	0	0	0	0	0	0	0	0	0	0	0	0	0	0	0	0	0	0	0	0	0	0	0	0	0	0	0	0	0	0
202611	Lysinibacillus odysseyi	0	0	0	0	0	0	0	0	0	0	0	0	0	0	0	0	0	0	0	0	0	0	0	0	0	0	0	0	0	0	0	0	0	0	0	0	0	0	0	0	0	0	0	0	0	0	0	0
292806	Lysinibacillus massiliensis	0	0	0	1e-05	0	0	0	0	0	0	0	0	0	0	0	0	0	0	0	0	0	0	0	0	0	0	0	0	0	0	0	0	0	0	0	0	1e-05	0	0	0	0	0	0	0	0	0	0	0
1293441	Lysinibacillus contaminans	0	0	0	0	0	0	0	0	0	0	0	0	0	0	0	0	0	0	0	0	0	0	0	0	0	0	0	0	0	0	0	0	0	0	0	0	0	0	0	0	0	0	0	0	0	0	0	0
1946771	Lysinibacillus sp. UBA2576	0	0	0	0	0	0	0	0	0	0	0	0	0	0	0	0	0	0	0	0	0	0	0	0	0	0	0	0	0	0	0	0	0	0	0	0	0	0	0	0	0	0	0	0	0	0	0	0
1811976	[Bacillus] sp. KCTC 13219	0	0	0	0	0	0	0	0	0	0	0	0	0	0	0	0	0	0	0	0	0	0	0	0	0	0	0	0	0	0	0	0	0	0	0	0	0	0	0	0	0	0	0	0	0	0	0	0
1266064	Lysinibacillus manganicus	0	0	0	0	0	0	0	0	0	0	0	0	0	0	0	0	0	0	0	0	0	0	0	0	0	0	0	0	0	0	0	0	0	0	0	0	0	0	0	0	0	0	0	0	0	0	0	0
1461583	Lysinibacillus saudimassiliensis	0	0	0	0	0	0	0	0	0	0	0	0	0	0	0	0	0	0	0	0	0	0	0	0	0	0	0	0	0	0	0	0	0	0	0	0	0	0	0	0	0	0	0	0	0	0	0	0
1396	Bacillus cereus	1e-05	1e-05	1e-05	2e-05	1e-05	1e-05	1e-05	1e-05	1e-05	1e-05	1e-05	0	0.00015	2e-05	5e-05	3e-05	0.00012	0	1e-05	2e-05	1e-05	1e-05	0	1e-05	1e-05	2e-05	0	0	6e-05	0	8e-05	0.00012	4e-05	0	1e-05	2e-05	2e-05	0	4e-05	1e-05	0	0.00017	3e-05	2e-05	0	0.00012	8e-05	3e-05
1428	Bacillus thuringiensis	1e-05	1e-05	1e-05	3e-05	1e-05	1e-05	1e-05	1e-05	2e-05	1e-05	1e-05	1e-05	0.00367	0.00116	0.00187	0.00095	0.00133	0.00148	1e-05	1e-05	2e-05	1e-05	0	1e-05	1e-05	0.00169	0.00278	0.00037	0.0018	0.00139	0.00156	0.00191	0.00279	0	2e-05	2e-05	3e-05	1e-05	1e-05	2e-05	0.0003	0.00293	0.00337	0.00285	0.00087	0.00277	0.00141	0.0096
574375	Bacillus gaemokensis	0	0	0	0	0	0	0	0	0	0	0	0	0	0	0	2e-05	0	0	0	0	0	0	0	0	0	0	0	0	0	0	2e-05	2e-05	0	0	0	0	0	0	0	0	0	0	0	0	3e-05	0	0	0
1890302	Bacillus wiedmannii	0	1e-05	0	0	0	0	0	0	0	0	0	0	0	0	0	0	0	0	0	0	0	0	0	0	0	0	0	0	0	0	0	0	0	0	0	2e-05	0	0	0	0	0	0	0	0	0	0	0	0
64104	Bacillus pseudomycoides	0	0	0	0	0	0	0	0	0	0	0	0	0	0	0	0	0	0	0	0	0	0	0	0	0	0	0	0	0	0	0	0	0	0	0	0	0	0	0	0	0	0	0	0	0	0	0	0
580165	Bacillus cytotoxicus	0	0	0	0	0	0	0	0	0	0	0	0	0	0	0	0	0	0	0	0	0	0	0	0	0	0	0	0	0	0	0	0	0	0	0	0	0	0	0	2e-05	0	0	0	0	0	0	0	0
1423	Bacillus subtilis	1e-05	1e-05	0	0	2e-05	0	0.00011	2e-05	0	6e-05	0	0	0.00106	0.00061	0.00048	0.0004	0.00058	0.00052	1e-05	1e-05	0.00011	0	0	5e-05	0	0.00591	0.00044	0.0002	0.00145	0.00056	0.00069	0.00105	0.00092	0	0	4e-05	0	0	0	0	0.00085	0.00048	0.00258	0.00705	0.00896	0.0017	0.00059	0.00086
72360	Bacillus mojavensis	0	0	0	0	0	0	0	0	0	0	0	0	0	0	0	0	0	0	0	0	0	0	0	0	0	0	0	0	0	0	0	0	0	0	0	0	0	0	0	0	0	0	0	0	0	0	0	0
35841	Bacillus thermoamylovorans	1e-05	0	0	0	0	0	0	0	0	0	0	0	0	0	0	0	0	0	0	0	0	0	0	1e-05	0	0	0	0	0	0	0	0	0	0	0	0	0	0	0	0	0	0	0	0	0	0	0	0
1464122	Bacillus lonarensis	0	0	0	0	0	0	0	0	0	0	0	0	0	0	0	0	0	0	0	0	0	0	0	0	0	0	0	0	0	0	0	0	0	0	0	0	0	0	0	0	0	0	0	0	0	0	0	0
1664069	Bacillus glycinifermentans	0	0	0	0	0	0	0	0	0	0	0	0	0	0	0	0	0	0	0	0	0	0	0	0	0	0	0	0	0	0	0	0	0	0	0	0	0	0	0	0	0	0	0	0	0	0	0	0
935836	Bacillus sp. J33	0	0	0	0	0	0	0	0	0	0	0	0	0	0	0	0	0	0	0	0	0	0	0	0	0	0	0	0	0	0	0	0	0	0	0	0	0	0	0	0	0	0	0	0	0	0	0	0
1243664	Bacillus massiliogorillae	0	0	0	0	0	0	0	0	0	0	0	0	0	0	0	0	0	0	0	0	0	0	0	0	0	0	0	0	0	0	0	0	0	0	0	0	0	0	0	0	0	0	0	0	0	0	0	0
859144	Bacillus gottheilii	0	0	0	0	0	0	0	0	0	0	0	0	2e-05	2e-05	0	0	0	5e-05	0	0	0	0	0	1e-05	0	0	3e-05	3e-05	5e-05	0	9e-05	7e-05	0.00013	0	0	0	0	0	0	0	0	0.00012	6e-05	5e-05	2e-05	0.00011	4e-05	0
1684144	Bacillus sp. FJAT-27245	0	0	0	1e-05	0	0	0	0	0	0	0	1e-05	0	0	0	0	0	0	0	0	0	0	0	0	0	0	0	0	0	0	0	0	0	0	0	0	1e-05	0	0	0	0	0	0	0	0	0	0	0
1849370	Bacillus sp. MKU004	1e-05	0	0	2e-05	0	1e-05	1e-05	0	0	0	1e-05	2e-05	0	0	0	0	0	0	0	1e-05	0	0	0	1e-05	0	0	0	0	0	0	0	0	0	0	0	1e-05	2e-05	0	1e-05	0	0	0	0	0	0	0	0	0
412384	Bacillus aryabhattai	0	0	0	0	0	0	0	0	0	0	0	0	0	0	0	0	0	0	0	0	0	0	0	0	0	0	0	0	0	0	0	0	0	0	0	0	0	0	0	0	0	0	0	0	0	0	0	0
1193713	Bacillus mesonae	0	0	0	0	0	0	0	0	0	0	0	0	0	0	0	0	0	0	0	0	0	0	0	0	0	0	0	0	0	0	0	0	0	0	0	0	0	0	0	0	0	0	0	0	0	0	0	0
1402861	Bacillus filamentosus	0	0	0	0	0	0	0	0	0	0	0	0	0	0	0	0	0	0	0	0	0	0	0	0	0	0	0	0	0	0	0	0	0	0	1e-05	0	0	0	0	0	0	0	0	0	0	0	0	0
1571209	Bacillus onubensis	0	0	0	0	0	0	0	0	0	0	0	0	0	0	0	0	0	0	0	0	0	0	0	0	0	0	0	0	0	0	0	0	0	0	0	0	0	0	0	0	0	0	0	0	0	0	0	0
1516104	Bacillus solisilvae	0	0	0	0	0	0	0	0	0	0	0	0	0	0	0	0	0	0	0	0	0	0	0	0	0	0	0	0	0	0	0	0	0	0	0	0	0	0	0	0	0	0	0	0	0	0	0	0
115979	Bacillus nealsonii	0	0	0	1e-05	0	0	0	0	0	0	0	0	0	0	0	0	0	0	0	0	0	0	0	0	0	0	0	0	0	0	0	0	0	0	0	0	1e-05	0	0	0	0	0	0	0	0	0	0	0
1454	Bacillus azotoformans	0	0	0	1e-05	0	0	0	0	0	0	0	0	0	0	0	0	0	0	0	1e-05	0	0	0	0	0	0	0	0	0	0	0	0	0	0	0	1e-05	1e-05	0	1e-05	0	0	0	0	0	0	0	0	0
1178537	Bacillus xiamenensis	0	0	0	0	0	0	0	0	0	0	0	0	0	0	0	0	0	0	0	0	0	0	0	0	0	0	0	0	0	0	0	0	0	0	0	0	0	0	0	0	0	0	0	0	0	0	0	0
549687	Bacillus horneckiae	0	0	0	0	0	0	0	0	0	0	0	0	0.00013	2e-05	7e-05	5e-05	7e-05	5e-05	0	0	0	0	0	0	0	3e-05	3e-05	3e-05	0	2e-05	5e-05	7e-05	0.00011	0	0	0	0	0	0	0	0	4e-05	1e-05	3e-05	3e-05	0	6e-05	2e-05
304268	Bacillus alkalitelluris	0	0	0	0	0	0	0	0	0	0	0	0	0.00013	2e-05	4e-05	2e-05	4e-05	5e-05	0	0	0	0	0	0	0	0.0001	0.00015	6e-05	0.0001	9e-05	0.00011	4e-05	0.00019	0	0	0	0	0	0	0	0	0.00015	4e-05	5e-05	0.0004	4e-05	0.00015	0.00016
1408103	Bacillus campisalis	0	0	0	0	0	0	0	0	0	0	0	0	0	0	0	0	0	0	1e-05	0	0	0	0	0	0	0	0	0	0	0	0	0	0	0	0	0	0	0	0	0	0	0	0	0	0	0	0	0
1499685	Bacillus andreraoultii	0	0	0	0	0	0	0	0	0	0	0	0	0	0	0	0	0	0	0	0	0	0	0	0	0	0	0	0	0	0	0	0	0	0	0	0	0	0	0	0	0	0	0	0	0	0	0	0
264697	Bacillus muralis	0	0	0	0	0	0	0	0	0	0	0	0	0	0	0	0	0	0	0	0	0	0	0	0	0	0	0	0	0	0	0	0	0	0	0	0	0	0	0	0	0	0	0	0	0	0	0	0
666686	Bacillus sp. 1NLA3E	0	0	0	0	0	0	0	0	0	0	0	0	0	0	0	0	0	0	0	0	0	0	0	0	0	0	0	0	0	0	0	0	0	0	0	0	0	0	0	0	0	0	0	0	0	0	0	0
1678001	Bacillus sp. MUM 13	0	0	0	0	0	0	0	0	0	0	0	0	0	0	0	0	0	0	0	0	0	0	0	0	0	0	0	0	0	0	0	0	0	0	0	0	0	0	0	0	0	0	0	0	0	0	0	0
2033483	Bacillus sp. AFS006103	0	0	0	0	0	0	0	0	0	0	0	0	0	0	0	0	0	0	0	0	0	0	0	0	0	0	0	0	0	0	0	0	0	0	0	0	0	0	0	0	0	0	0	0	0	0	0	0
1904753	Bacillus sp. SA5d-4	0	0	0	0	0	0	0	0	0	0	0	0	0	0	0	0	0	0	1e-05	0	0	1e-05	0	0	0	0	0	0	0	0	0	0	0	0	0	0	0	0	0	0	0	0	0	0	0	0	0	0
1455	Bacillus badius	0	0	0	0	0	0	0	0	0	0	0	1e-05	0	0	0	0	0	0	0	0	0	0	0	0	0	0	0	0	0	0	0	0	0	0	0	0	0	0	1e-05	0	0	0	0	0	0	0	0	0
1882761	Bacillus sp. OK048	0	0	0	1e-05	0	0	0	0	0	0	0	0	0.00108	0.00023	0.00021	0.0004	0.00032	0.00018	0	0	0	0	0	0	0	0.00021	0.00044	0.00015	0.00019	0.00019	0.00043	0.0003	0.00055	0	0	0	1e-05	0	0	0	0	0.00041	0.00061	0.00076	0.00016	0.00041	0.0005	0.00027
1850362	Bacillus sp. FJAT-27264	0	0	0	1e-05	0	0	0	0	0	0	0	0	0	0	0	0	0	0	0	0	0	0	0	0	0	0	0	0	0	0	0	0	0	0	0	0	1e-05	0	0	0	0	0	0	0	0	0	0	0
79884	Bacillus pseudalcaliphilus	0	0	0	0	0	0	0	0	0	0	0	0	0	0	0	0	0	0	0	0	0	0	0	0	0	0	0	0	0	0	0	0	0	0	0	0	0	0	0	0	0	0	0	0	0	0	0	0
1678002	Bacillus sp. MUM 116	0	0	0	0	0	0	0	0	0	0	0	0	0	0	0	0	0	0	0	0	0	0	0	0	0	0	0	0	0	0	0	0	0	0	0	0	0	0	0	0	0	0	0	0	0	0	0	0
2014075	Bacillus sp. FJAT-46582	0	0	0	0	0	0	0	0	0	0	0	0	0	0	0	0	0	0	0	0	0	0	0	0	0	0	0	0	0	0	0	0	0	0	1e-05	0	0	0	0	0	0	0	0	0	0	0	0	0
1441095	Bacillus gobiensis	0	0	0	0	0	0	0	0	0	0	0	0	6e-05	0	0	0	0	0	0	0	0	0	0	0	0	0	5e-05	0	0	0	0	2e-05	0	0	0	0	0	0	0	0	0	0	2e-05	3e-05	2e-05	4e-05	4e-05	0
2066053	Bacillus sp. UMB0893	0	0	0	0	0	0	0	0	0	0	0	0	0	0	0	0	0	0	0	0	0	0	0	0	0	0	0	0	0	0	0	0	0	0	0	0	1e-05	0	0	0	0	0	0	0	0	0	0	0
308892	Bacillus boroniphilus	0	0	0	0	0	0	0	0	0	0	0	0	0	0	0	0	0	0	0	0	0	0	0	0	0	0	0	0	0	0	0	0	0	0	0	0	0	0	0	0	0	0	0	0	0	0	0	0
2033499	Bacillus sp. AFS037270	0	0	0	0	0	0	0	0	0	0	0	0	0	0	0	0	0	0	0	0	0	0	0	0	0	0	0	0	0	0	0	0	0	0	0	0	0	0	0	0	0	0	0	0	0	0	0	0
519977	Bacillus korlensis	0	0	0	0	0	0	0	0	0	0	0	0	0	0	0	0	0	0	0	0	0	0	0	0	0	0	0	0	0	0	0	0	0	0	0	0	0	0	0	0	0	0	0	0	0	0	0	0
561879	Bacillus safensis	0	0	0	0	0	0	0	0	0	0	0	0	0	0	0	0	0	0	0	0	0	0	0	0	0	0	0	0	0	0	0	0	0	0	0	0	0	0	0	0	0	0	0	0	0	0	0	0
632773	Bacillus beveridgei	0	0	0	0	0	0	0	0	0	0	0	0	0	0	0	0	0	0	0	0	0	0	0	0	0	0	0	0	0	0	0	0	0	0	0	0	0	0	0	0	0	0	0	0	0	0	0	0
2022547	Bacillus sp. 7504-2	0	0	0	0	0	0	0	0	0	0	0	0	0	0	0	0	0	0	0	0	0	0	0	0	0	0	0	0	0	0	0	0	0	0	0	0	0	0	0	0	0	0	0	0	0	0	0	0
2021690	Bacillus sp. 7586-K	0	0	0	0	0	0	0	0	0	0	0	0	0	0	0	0	0	0	0	0	0	0	0	0	0	0	0	0	0	0	0	0	0	0	0	0	0	0	0	0	0	0	0	0	0	0	0	0
762947	Bacillus eiseniae	0	0	0	1e-05	0	0	0	0	0	0	0	0	0.0003	0.00011	4e-05	0.00014	0.00018	0.00027	0	0	0	0	0	0	0	8e-05	0.0001	9e-05	0	0.00018	0.00026	0.00022	0.00027	0	0	0	1e-05	0	0	0	5e-05	0.00027	0.00013	0.00025	0.0002	4e-05	0.0004	5e-05
1761764	Bacillus sp. es.036	0	0	0	0	0	0	0	0	0	0	0	0	0	0	0	0	0	3e-05	0	0	0	0	0	0	0	2e-05	3e-05	0	0	2e-05	5e-05	0	0	0	0	0	0	0	0	0	0	0	2e-05	0	2e-05	0	2e-05	0
930152	Bacillus salsus	0	0	0	0	0	0	0	0	0	0	0	0	0	0	0	0	0	0	0	0	0	0	0	0	0	0	0	0	0	0	0	0	0	0	0	0	0	0	0	0	0	0	0	0	0	0	2e-05	0
1978338	Bacillus sp. EAC	0	0	0	0	0	0	0	0	0	0	0	0	8e-05	6e-05	4e-05	4e-05	0	0.0001	0	0	0	0	0	0	0	5e-05	0.00017	3e-05	0.00024	0.00013	0.00013	0.00017	0.00014	0	0	0	0	0	0	0	0	4e-05	9e-05	0	2e-05	0	0.00022	8e-05
1882763	Bacillus sp. OV166	0	0	0	0	0	0	0	0	0	0	0	0	0	0	0	0	0	0	0	0	0	0	0	0	0	0	0	0	0	0	0	0	0	0	0	0	0	0	0	0	0	0	0	0	0	0	0	0
1679169	Bacillus sp. FJAT-27916	0	0	0	0	0	0	0	0	0	0	0	0	0.00014	0.00013	2e-05	5e-05	4e-05	3e-05	0	0	0	0	0	0	0	0.0001	0.00032	3e-05	0.0002	9e-05	0.00032	0.00013	0.00012	0	0	0	0	0	0	0	0.00015	0.00022	0.00011	9e-05	0.0002	0.00014	0.00016	0.00022
1679170	Bacillus loiseleuriae	0	0	0	0	0	0	0	0	0	0	0	0	0	0	0	0	0	0	0	0	0	0	0	0	0	0	0	0	0	0	0	0	0	0	0	0	0	0	0	0	0	0	0	0	0	0	0	0
1499688	Bacillus sp. LF1	0	0	0	0	0	0	0	0	0	0	0	0	0	0	0	0	0	0	0	0	0	0	0	0	0	0	0	0	0	0	0	0	0	0	0	0	0	0	0	0	0	0	0	0	0	0	0	0
1397	Bacillus circulans	0	0	0	0	0	0	0	0	0	0	0	0	0	0	0	0	0	0	0	0	0	0	0	0	0	0	0	0	0	0	0	0	0	0	0	0	0	0	0	0	0	0	0	0	0	0	0	0
1460650	Bacillus sp. JCM 19056	0	0	0	0	0	0	0	0	0	0	0	0	0.00035	0.00052	0.00011	0.00013	0.00018	0.00056	0	0	0	0	0	0	0	0.00034	0.00042	0.00015	0	0.00023	0.00011	0.00047	0.00033	0	0	0	0	0	0	0	5e-05	0.00029	0.00074	0.00026	0	0.00021	6e-05	0.00018
1816693	Bacillus massiliglaciei	0	0	0	0	0	0	0	0	0	0	0	0	0	0	0	0	0	0	0	0	0	0	0	0	0	0	0	0	0	0	0	0	0	0	0	0	0	0	0	0	0	0	0	0	0	0	0	0
1049581	Bacillus cellulasensis	0	0	0	0	0	0	0	0	0	0	0	0	0	0	0	0	0	0	0	0	0	0	0	0	0	0	0	0	0	0	0	0	0	0	0	0	0	0	0	0	0	0	0	0	0	0	0	0
209389	Bacillus acidicola	0	0	0	0	0	0	0	0	0	0	0	0	0	0	0	0	0	0	0	0	0	0	0	0	0	0	0	0	0	0	0	0	0	0	0	0	0	0	0	0	0	0	0	0	0	0	0	0
220684	Bacillus drentensis	0	0	0	0	0	0	0	0	0	0	0	0	0.00024	0.00015	7e-05	0.00014	0.00026	0.00048	0	0	0	0	0	0	0	0.00015	0.00049	0.00019	0.0001	0.00022	0.00092	0.00013	0.00025	0	0	0	0	0	0	0	0.00017	0.00042	0.00027	0.0002	0.00022	0.00022	0.00026	0.00037
1479	Bacillus smithii	0	0	0	0	0	0	0	0	0	0	0	0	0	0	0	0	0	0	0	0	0	0	0	0	0	0	0	0	0	0	0	0	0	0	0	0	0	0	0	0	0	0	0	0	0	0	0	0
935837	Bacillus sp. J37	0	0	0	0	0	0	0	0	0	0	0	0	0	0	0	0	0	0	0	0	0	0	0	0	0	0	0	0	0	0	0	0	0	0	0	0	0	0	0	0	0	0	0	0	0	0	0	0
1467	Bacillus lentus	0	0	0	0	0	0	0	0	0	0	0	0	0	0	0	0	0	0	0	0	0	0	0	0	0	0	0	0	0	0	0	0	0	0	0	0	0	0	0	0	0	0	0	0	0	0	0	0
1912214	Bacillus sp. FJAT-44921	0	0	0	1e-05	0	0	0	0	0	0	0	0	0	0	0	0	0	0	0	0	0	0	0	0	0	0	0	0	0	0	0	0	0	0	0	0	1e-05	0	0	0	0	0	0	0	0	0	0	0
1914540	Bacillus obstructivus	0	0	0	0	0	0	0	0	0	0	0	0	3e-05	0	0	0	0	0	0	0	0	0	0	0	0	0	0	9e-05	0	0	6e-05	3e-05	2e-05	0	0	0	0	0	0	0	0	0	1e-05	2e-05	3e-05	4e-05	0	3e-05
1221450	Bacillus abyssalis	0	0	0	0	0	0	0	0	0	0	0	0	0.00015	0	2e-05	2e-05	4e-05	3e-05	0	0	0	0	0	0	0	0	3e-05	0	0	2e-05	2e-05	0	9e-05	0	0	0	0	0	0	0	0	8e-05	0	2e-05	0	4e-05	6e-05	0
1208600	Bacillus sp. FJAT-14578	0	0	0	0	0	0	0	0	0	0	0	0	0	0	0	0	0	0	0	0	0	0	0	0	0	0	0	0	0	0	0	0	0	0	0	0	0	0	0	0	0	0	0	0	0	0	0	0
1208599	Bacillus cihuensis	0	0	0	0	0	0	0	0	0	0	0	0	8e-05	0	0	0	4e-05	9e-05	0	0	0	0	0	0	0	0	0	3e-05	5e-05	7e-05	0	0.00015	5e-05	0	0	0	0	0	0	0	0	0	2e-05	0.00035	0	0	0.00055	0
1191699	Bacillus oryziterrae	0	0	0	0	0	0	0	0	0	0	0	0	0	0	0	0	0	0	0	0	0	0	0	0	0	0	0	0	0	0	0	0	0	0	0	0	0	0	0	0	0	0	0	0	0	0	0	0
1926278	Bacillus dakarensis	0	0	0	0	0	0	0	0	0	0	0	0	0	0	0	0	0	0	0	0	0	0	0	0	0	0	0	0	0	0	0	0	0	0	0	0	0	0	0	0	0	0	0	0	0	0	0	0
1408303	Bacillus sp. MB2021	0	0	0	0	0	0	0	0	0	0	0	0	0	0	0	0	0	0	0	0	0	0	0	0	0	0	0	0	0	0	0	0	0	0	0	0	0	0	0	0	0	0	0	0	0	0	0	0
178774	Bacillus luciferensis	0	0	0	0	0	0	0	0	0	0	0	0	0	0	0	0	0	0	0	0	0	0	0	0	0	0	0	0	0	0	0	0	0	0	0	0	0	0	0	0	0	0	0	0	0	0	0	0
2011012	Bacillus sp. FJAT-45348	0	0	0	0	0	0	0	0	0	0	0	0	0	0	0	0	0	0	0	0	0	0	0	0	0	0	0	0	0	0	0	0	0	0	0	0	0	0	1e-05	0	0	0	0	0	0	0	0	0
2014005	Bacillus sp. FJAT-44742	0	0	0	0	0	0	0	0	0	0	0	0	0.00064	0.00013	0.00015	0.00011	0.00037	0.00043	0	0	0	0	0	0	0	0.00042	0.00057	0.0003	0.00037	0.00015	0.00081	0.00054	0.00048	0	0	0	0	0	0	0	0.00023	0.00056	0.00027	0.00035	0.00031	0.00032	0.0005	0.00026
745820	Bacillus daliensis	0	0	0	0	0	0	0	0	0	0	0	0	0	0	0	0	0	0	0	0	0	0	0	0	0	0	0	0	0	0	0	0	0	0	0	0	0	0	0	0	0	0	0	0	0	0	0	0
673318	Bacillus deserti	0	0	0	0	0	0	0	0	0	0	0	0	0	0	0	0	0	0	0	0	0	0	0	0	0	0	0	0	0	0	0	0	0	0	0	0	0	0	0	0	0	0	0	0	0	0	0	0
665959	Bacillus sp. 2_A_57_CT2	0	0	0	0	0	0	0	0	0	0	0	0	0	0	0	0	0	0	0	0	0	0	0	0	0	0	0	0	0	0	0	0	0	0	0	0	0	0	0	0	0	0	0	0	0	0	0	0
1742359	Bacillus sp. FJAT-25496	0	0	0	0	0	0	0	0	0	0	0	0	0	0	0	0	0	0	0	0	0	0	0	0	0	0	0	0	0	0	0	0	0	0	0	0	0	0	0	0	0	0	0	0	0	0	0	0
1679166	Bacillus sp. FJAT-27445	0	0	0	0	0	0	0	0	0	0	0	0	0	0	0	0	0	0	0	0	0	0	0	0	0	0	0	0	0	0	0	0	0	0	0	0	0	0	0	0	0	0	0	0	0	0	0	0
1679167	Bacillus sp. FJAT-27238	0	0	0	0	0	0	0	0	1e-05	1e-05	0	1e-05	0.00021	0	5e-05	0.00015	0	0	1e-05	0	1e-05	0	0	1e-05	1e-05	5e-05	0	0	0	0	6e-05	5e-05	0.00015	0	1e-05	0	1e-05	0	0	0	0	0	0	0	0	0	0.00012	0
1707093	Bacillus camelliae	0	0	0	0	0	0	0	0	0	0	0	0	0	0	0	0	0	0	0	0	0	0	0	0	0	0	0	0	0	0	0	0	0	0	0	0	0	0	0	0	0	0	0	0	0	0	0	0
246272	Bacillus bogoriensis	0	0	0	0	0	0	0	0	0	0	0	0	0	0	0	0	0	0	0	0	0	0	0	0	0	0	0	0	0	0	0	0	0	0	0	0	0	0	0	0	0	0	0	0	0	0	0	0
1565991	Bacillus sp. X1(2014)	0	0	0	0	0	0	0	0	0	0	0	0	0	0	0	0	0	0	0	0	0	0	0	0	0	0	0	0	0	0	0	0	0	0	0	0	0	0	0	0	0	0	0	0	0	0	0	0
1522308	Bacillus niameyensis	0	0	0	0	0	0	0	0	0	0	0	0	0	0	0	0	0	0	0	0	0	0	0	0	0	0	0	0	0	0	0	0	0	0	0	0	0	0	0	0	0	0	0	0	0	0	0	0
1740721	Bacillus cucumis	0	0	0	0	0	0	0	0	0	0	0	0	0	0	0	0	0	0	0	0	0	0	0	0	0	0	0	0	0	0	0	0	0	0	0	0	0	0	0	0	0	0	0	0	0	0	0	0
1742358	Bacillus praedii	0	0	0	0	0	0	0	0	0	0	0	0	0	0	0	0	0	0	0	0	0	0	0	0	0	0	0	0	0	0	0	0	0	0	0	0	0	0	0	0	0	0	0	0	0	0	0	0
1471	Bacillus methanolicus	0	0	0	0	0	0	0	0	0	0	0	0	0	0	0	0	0	0	0	0	0	0	0	0	0	0	0	0	0	0	0	0	0	0	0	0	0	0	0	0	0	0	0	0	0	0	0	0
1468413	Bacillus massilioanorexius	0	0	0	0	0	0	0	0	0	0	0	0	0	0	0	0	0	0	0	0	0	0	0	0	0	0	0	0	0	0	0	0	0	0	0	0	0	0	0	0	0	0	0	0	0	0	0	0
1743144	Bacillus sp. FJAT-27225	0	0	0	0	0	0	0	0	0	0	0	0	0	0	0	0	0	0	0	0	0	0	0	0	0	0	0	0	0	0	0	0	0	0	0	0	0	0	0	0	0	0	0	0	0	0	0	0
1761761	Bacillus sp. cl95	0	0	0	0	0	0	0	0	0	0	0	0	0	0	0	0	0	0	0	0	0	0	0	0	0	0	0	0	0	0	0	0	0	0	0	0	0	0	0	0	0	0	0	0	0	0	0	0
33932	Bacillus cohnii	0	0	0	0	0	0	0	0	0	0	0	0	0	0	0	0	0	0	0	0	0	0	0	0	0	0	0	0	0	0	0	0	0	0	0	0	0	0	0	0	0	0	0	0	0	0	0	0
1455638	Bacillus sp. SA1-12	0	0	0	0	0	0	0	0	0	0	0	0	0	0	0	0	0	0	0	0	0	0	0	0	0	0	0	0	0	0	0	0	0	0	0	0	0	0	0	0	0	0	0	0	0	0	0	0
1793963	Bacillus nakamurai	0	0	0	0	0	0	0	0	0	0	0	0	0	0	0	0	0	0	0	0	0	0	0	0	0	0	0	0	0	0	0	0	0	0	0	0	0	0	0	0	0	0	0	0	0	0	0	0
1448271	Bacillus oleivorans	0	0	0	0	0	0	0	0	0	0	0	0	0	0	0	0	0	0	0	0	0	0	0	0	0	0	0	0	0	0	0	0	0	0	0	0	0	0	0	0	0	0	0	0	0	0	0	0
161544	Bacillus sp. SG-1	0	0	0	0	0	0	0	0	0	0	0	0	0	0	0	0	0	0	0	0	0	0	0	0	0	0	0	0	0	0	0	0	0	0	0	0	0	0	0	0	0	0	0	0	0	0	0	0
427920	Bacillus alkalinitrilicus	0	0	0	0	0	0	0	0	0	0	0	0	8e-05	3e-05	8e-05	0.00013	8e-05	0	0	0	0	0	0	0	0	0	9e-05	4e-05	0	0	3e-05	5e-05	0.00012	0	0	0	0	0	0	0	0	0.00014	3e-05	2e-05	2e-05	0	9e-05	0
1404	Bacillus megaterium	0	0	0	0	0	0	0	0	0	0	0	0	0	0	0	0	0	0	0	0	0	0	0	0	0	0	0	0	0	0	0	0	0	0	0	0	0	0	0	0	0	0	0	0	0	0	0	0
2033481	Bacillus sp. AFS002410	0	0	0	0	0	0	0	0	0	0	0	0	0	0	0	0	0	0	0	0	0	0	0	0	0	0	0	0	0	0	0	0	0	0	0	0	0	0	0	0	0	0	0	0	0	0	0	0
2033486	Bacillus sp. AFS015802	0	0	0	0	0	0	0	0	0	0	0	0	0	0	0	0	4e-05	0	0	0	0	0	0	0	0	0	2e-05	3e-05	0	0	2e-05	0	2e-05	0	0	0	0	0	0	0	0	0	0	2e-05	0	0	2e-05	4e-05
427072	Bacillus chagannorensis	0	0	0	0	0	0	0	0	0	0	0	0	0	0	0	0	0	0	0	0	0	0	0	0	0	0	0	0	0	0	0	0	0	0	0	0	0	0	0	0	0	0	0	0	0	0	0	0
388741	Bacillus selenatarsenatis	0	0	0	0	0	0	0	0	0	0	0	0	0	0	0	0	0	0	0	0	0	0	0	0	0	0	0	0	0	0	0	0	0	0	0	0	0	0	0	0	0	0	0	0	0	0	0	0
2033491	Bacillus sp. AFS018417	0	0	0	0	0	0	0	0	0	0	0	0	0	0	0	0	0	0	0	0	0	0	0	0	0	0	0	0	0	0	0	0	0	0	0	0	0	0	0	0	0	0	0	0	0	0	0	0
459347	Bacillus cecembensis	0	0	0	0	0	0	0	0	0	0	0	0	0	0	0	0	0	0	0	0	0	0	0	0	0	0	0	0	0	0	0	0	0	0	0	0	0	0	0	0	0	0	0	0	0	0	0	0
254757	Bacillus farraginis	0	0	0	1e-05	0	0	0	0	0	0	0	0	0	0	0	0	0	0	0	0	0	0	0	0	0	0	0	0	0	0	0	0	0	0	0	0	1e-05	0	0	0	0	0	0	0	0	0	0	0
519424	Bacillus trypoxylicola	0	0	0	0	0	0	0	0	0	0	0	0	0	0	0	0	0	0	0	0	0	0	0	0	0	0	0	0	0	0	0	0	0	0	0	0	0	0	0	0	0	0	0	0	0	0	0	0
2021693	Bacillus sp. 7884-1	0	0	0	0	0	0	0	0	0	0	0	0	0	0	0	0	0	0	0	0	0	0	0	0	0	0	0	0	0	0	0	0	0	0	0	0	0	0	0	0	0	0	0	0	0	0	0	0
2033507	Bacillus sp. AFS055030	0	0	0	0	0	0	0	0	0	0	0	0	0	0	0	0	0	0	0	0	0	0	0	0	0	0	0	0	0	0	0	0	0	0	0	0	0	0	0	0	0	0	0	0	0	0	0	0
2033508	Bacillus sp. AFS059628	0	0	0	0	0	0	0	0	0	0	0	0	0	0	0	0	0	0	0	0	0	0	0	0	0	0	0	0	0	0	0	0	0	0	0	0	0	0	0	0	0	0	0	0	0	0	0	0
1917889	Virgibacillus dakarensis	0	0	0	0	0	0	0	0	0	0	0	0	0	0	0	0	0	0	0	0	0	0	0	0	0	0	0	0	0	0	0	0	0	0	0	0	0	0	0	0	0	0	0	0	0	4e-05	0	0
302167	Virgibacillus dokdonensis	1e-05	0	0	0	0	0	0	0	0	0	0	0	0	0	0	0	0	0	0	0	0	0	0	0	0	0	0	0	0	0	0	0	0	0	0	0	0	0	0	0	0	0	0	0	0	0	0	0
2024555	Virgibacillus profundi	0	0	0	0	0	0	0	0	0	0	0	0	0.00034	6e-05	6e-05	0.00014	0.00022	8e-05	0	0	0	0	0	0	0	0.00013	0.00013	0.00012	5e-05	0.00032	0	0.0003	0.00018	0	0	0	1e-05	0	0	0	6e-05	0.00024	4e-05	0.00019	0.00052	3e-05	0.0001	0.00019
2024554	Virgibacillus indicus	0	0	0	0	0	0	0	0	0	0	0	0	0.00018	4e-05	0	9e-05	6e-05	0.0001	0	0	0	0	0	0	0	5e-05	0.00021	0.00012	0.00016	4e-05	7e-05	0.0003	0.00017	0	0	0	0	0	0	0	0.00014	0.00029	2e-05	9e-05	0.00034	0.00011	0	0.00022
2017483	Virgibacillus phasianinus	0	0	0	0	0	0	0	0	0	0	0	0	0	0	0	0	0	0	0	0	0	0	0	0	0	0	0	0	0	0	0	0	0	0	0	0	0	0	0	0	0	0	0	0	0	0	0	0
1499679	Virgibacillus senegalensis	0	0	0	0	0	0	0	0	0	0	0	0	0	0	0	0	0	0	0	0	0	0	0	0	0	0	0	0	0	0	0	0	0	0	0	0	0	0	0	0	0	0	0	0	0	0	0	0
516703	Pontibacillus litoralis	1e-05	0	0	0	0	0	0	0	0	0	0	0	0	0	0	0	0	0	0	0	0	0	0	0	3e-05	0	0	0	0	0	0	0	0	0	0	0	0	0	0	0	0	0	0	2e-05	0	0	0	0
273164	Pontibacillus marinus	0	0	0	0	0	0	0	0	0	0	0	0	0	0	0	0	0	0	0	0	0	0	0	0	0	0	0	0	0	0	0	0	0	0	0	0	0	0	0	0	0	0	0	0	0	0	0	0
76935	Salipaludibacillus agaradhaerens	1e-05	0	0	0	0	0	0	0	0	0	0	0	0	0	0	0	0	0	0	0	0	0	0	0	0	0	0	0	0	0	0	0	0	0	0	0	0	0	0	0	0	0	0	0	0	0	0	0
33938	Geobacillus thermocatenulatus	0	0	0	0	0	0	0	0	0	0	0	0	3e-05	2e-05	0	0	0	0	0	0	0	0	0	0	0	0	0	0	0	2e-05	3e-05	5e-05	0	0	0	0	0	0	0	0	0	0	1e-05	4e-05	0	0.00014	2e-05	5e-05
1954237	Geobacillus sp. LEMMY01	0	0	0	0	0	0	0	0	0	0	0	0	0	0	0	0	0	0	0	0	0	0	0	0	0	0	0	0	0	0	0	0	0	0	0	0	0	0	0	0	0	0	0	0	0	0	0	0
1921421	Geobacillus genomosp. 3	0	0	0	0	0	0	0	0	0	0	0	0	0	0	0	0	0	0	0	0	0	0	0	0	0	0	0	0	0	0	0	0	0	0	0	0	0	0	0	0	0	0	0	0	0	0	0	0
1629723	Geobacillus sp. 12AMOR1	0	0	0	0	0	0	0	0	0	0	0	0	0	0	0	0	0	0	0	0	0	0	0	0	0	0	0	0	0	0	0	0	0	0	0	0	0	0	0	0	0	0	0	0	0	0	0	0
937927	Oceanobacillus rekensis	0	0	0	0	0	0	0	0	0	0	0	0	0	0	0	0	0	0	0	0	0	0	0	0	0	0	0	0	0	0	0	0	0	0	0	0	0	0	0	0	0	0	0	0	0	0	0	0
582851	Oceanobacillus sojae	0	0	0	1e-05	0	0	0	0	0	0	0	0	0	0	0	0	0	0	0	0	0	0	0	0	0	0	0	0	0	0	0	0	0	0	0	0	1e-05	0	1e-05	0	0	0	0	0	0	0	0	0
182710	Oceanobacillus iheyensis	0	0	0	0	0	0	0	0	0	0	0	0	0	0	0	0	0	0	0	0	0	0	0	0	0	0	0	0	0	0	0	0	0	0	0	0	0	0	0	0	0	0	0	0	0	0	0	0
1462527	Oceanobacillus jeddahense	0	0	0	0	0	0	0	0	0	0	0	0	0	0	0	0	0	0	0	0	0	0	0	0	0	0	0	0	0	0	0	0	0	0	0	0	0	0	0	0	0	0	0	0	0	0	0	0
571933	Piscibacillus halophilus	0	0	0	0	0	0	0	0	0	0	0	0	0	0	0	0	0	0	0	0	0	0	0	0	0	0	0	0	0	0	0	0	0	0	0	0	0	0	0	0	0	0	0	0	0	0	0	0
266892	Salibacterium qingdaonense	0	0	0	0	0	0	0	0	0	0	0	0	0	0	0	0	0	0	0	0	0	0	0	0	0	0	0	0	0	0	0	0	0	0	0	0	0	0	0	0	0	0	0	0	0	0	0	0
1884432	Salibacterium halotolerans	0	0	0	0	0	0	0	0	0	0	0	0	0	0	0	0	0	0	0	0	0	0	0	1e-05	0	0	0	0	0	0	0	0	0	0	0	0	0	0	0	0	0	0	0	0	0	0	0	0
225985	Fictibacillus gelatini	0	0	0	0	0	0	0	0	0	0	0	0	0	0	0	0	0	0	0	0	0	0	0	0	0	0	0	0	0	0	0	0	0	0	0	0	0	0	0	0	0	0	0	0	0	0	0	0
1017270	Fictibacillus enclensis	0	0	0	0	0	0	0	0	0	0	0	0	0	0	0	0	0	0	0	0	0	0	0	0	0	0	0	0	0	0	0	0	0	0	0	0	0	0	0	0	0	0	0	0	0	0	0	0
1221500	Fictibacillus phosphorivorans	0	0	0	0	0	0	0	0	0	0	0	0	0	0	0	0	0	0	0	0	0	0	0	0	0	0	0	0	0	0	0	0	0	0	0	0	0	0	0	0	0	0	0	0	0	0	0	0
2021314	Fictibacillus aquaticus	0	0	0	0	0	0	0	0	0	0	0	0	0	0	0	0	0	0	0	0	0	0	0	0	0	0	0	0	0	0	0	0	0	0	0	0	0	0	0	0	0	0	0	0	0	0	0	0
361277	Terribacillus saccharophilus	0	0	0	1e-05	0	0	0	0	1e-05	0	0	0	0	0	0	0	0	0	0	0	0	0	0	1e-05	0	0	0	0	0	0	0	0	0	0	1e-05	1e-05	2e-05	0	0	0	0	0	0	0	0	0	0	0
442899	Halolactibacillus alkaliphilus	0	0	0	0	0	0	0	0	0	0	0	0	0	0	0	0	0	0	0	0	0	0	0	0	0	0	0	0	0	0	0	0	0	0	0	0	0	0	0	0	0	0	0	0	0	0	0	0
306541	Halolactibacillus miurensis	0	0	0	0	0	0	0	0	0	0	0	0	0	0	0	0	0	0	0	0	0	0	0	0	0	0	0	0	0	0	0	0	0	0	0	0	0	0	0	0	0	0	0	0	0	0	0	0
570947	Salimicrobium flavidum	0	0	0	0	0	0	0	0	0	0	0	1e-05	0	0	0	0	0	0	0	0	0	0	0	0	0	0	0	0	0	0	0	0	0	0	0	0	0	0	0	0	0	0	0	0	0	0	0	0
86666	Salimicrobium halophilum	0	0	0	0	0	0	0	0	0	0	0	0	0	0	0	0	0	0	0	0	0	0	0	0	0	0	0	0	0	0	0	0	0	0	0	0	0	0	0	0	0	0	0	0	0	0	0	0
2029857	Salimicrobium sp. WN024	0	0	0	0	0	0	0	0	0	0	0	0	0	0	0	0	0	0	0	0	0	0	0	0	0	0	3e-05	3e-05	0	0	0	0	0	0	0	0	0	0	0	0	0	0	0	0	2e-05	0	0	2e-05
558169	Lentibacillus jeotgali	0	0	0	0	0	0	0	0	0	0	0	0	0	0	2e-05	0	0	0	0	0	0	0	0	0	0	0	0	0	0	0	0	0	0	0	0	0	0	0	0	0	0	0	0	0	0	0	0	0
1940529	Lentibacillus sediminis	0	0	0	0	0	0	0	0	0	0	0	0	0	0	0	0	0	0	0	0	0	0	0	0	0	0	0	0	0	0	0	0	0	0	0	0	0	0	0	0	0	0	0	0	0	0	0	0
470864	Gracilibacillus halophilus	0	0	0	0	0	0	0	0	0	0	0	0	0	0	0	0	0	0	0	0	0	0	0	0	0	0	0	0	0	0	0	0	0	0	0	0	0	0	0	0	0	0	0	0	0	0	0	0
1027249	Gracilibacillus kekensis	0	0	0	0	0	0	0	0	0	0	0	0	0	0	0	0	0	0	0	0	0	0	0	0	0	0	0	0	0	0	0	0	0	0	0	0	0	0	0	0	0	0	0	0	0	0	0	0
1816696	Gracilibacillus timonensis	0	0	0	0	0	0	0	0	0	0	0	0	0	0	0	0	0	0	0	0	0	0	0	0	0	0	0	0	0	0	0	0	0	0	0	0	0	0	0	0	0	0	0	0	0	0	0	0
240302	Halobacillus dabanensis	0	0	0	0	0	0	0	0	0	0	0	0	0	0	0	0	0	0	1e-05	0	0	0	0	0	0	0	0	0	0	0	0	0	0	0	0	0	0	0	0	0	0	0	0	0	0	0	0	0
2045014	Halobacillus sp. Marseille-P3879	0	0	0	0	0	0	0	0	0	0	0	0	0	0	0	0	0	0	0	0	0	0	0	0	0	0	0	0	0	0	0	0	0	0	0	0	0	0	0	0	0	0	0	0	0	0	0	0
153151	Parageobacillus toebii	0	0	0	0	0	0	0	0	0	1e-05	0	0	0	0	0	0	0	0	0	0	0	0	0	0	0	0	0	0	0	0	0	0	0	0	0	0	0	0	0	0	0	0	0	0	0	0	0	0
81408	Parageobacillus caldoxylosilyticus	0	0	0	0	0	0	0	0	0	0	0	0	0	0	0	0	0	0	0	0	0	0	0	0	0	0	0	0	0	0	0	0	0	0	0	0	0	0	0	0	0	0	0	0	0	0	0	0
1714016	Domibacillus iocasae	0	0	0	0	0	0	0	0	0	0	0	0	0	0	0	0	0	0	0	0	0	0	0	0	0	0	0	0	0	0	0	0	0	0	0	0	0	0	0	0	0	0	0	0	0	0	0	0
1484	Hydrogenibacillus schlegelii	0	0	0	0	0	0	0	0	0	0	0	0	0	0	0	0	0	0	0	0	0	0	0	0	0	0	0	0	0	0	0	0	0	0	0	0	0	0	0	0	0	0	0	0	0	0	0	0
407036	Sediminibacillus albus	0	0	0	0	0	0	0	0	0	0	0	0	0	0	0	0	0	0	0	0	0	0	0	0	0	0	0	0	0	2e-05	0	0	0	0	0	0	0	0	0	0	0	0	0	0	0	0	0	0
482461	Sediminibacillus halophilus	0	0	0	1e-05	0	0	0	0	0	0	0	0	0	0	0	0	0	0	0	0	0	0	0	0	0	0	0	0	0	0	0	0	0	0	0	0	0	0	0	0	0	0	0	0	0	0	0	0
373054	Calditerricola satsumensis	0	0	0	0	0	0	0	0	0	0	0	0	0	0	0	0	0	0	0	0	0	0	0	0	0	0	0	0	0	0	0	0	0	0	0	0	0	0	0	1e-05	0	0	0	0	0	0	0	0
301148	Caldibacillus debilis	0	0	0	0	0	0	0	0	0	0	0	0	0	0	0	0	0	0	0	0	0	1e-05	0	0	0	0	0	0	0	0	0	0	0	0	0	0	0	0	0	0	0	0	0	0	0	0	0	0
549003	Natribacillus halophilus	0	0	0	0	0	0	0	0	0	0	0	0	0	0	0	0	0	0	0	0	0	0	0	0	0	0	0	0	0	0	0	0	0	0	0	0	0	0	0	0	0	0	0	0	0	0	0	0
237682	Salinibacillus kushneri	0	0	0	0	0	0	0	0	0	0	0	0	0	0	0	0	0	0	0	0	0	0	0	0	0	0	0	0	0	0	0	0	0	0	0	0	0	0	0	0	0	0	0	0	0	0	0	0
694055	Ornithinibacillus contaminans	0	0	0	0	0	0	0	0	0	0	0	0	0	0	0	0	0	0	0	0	0	0	0	0	0	0	0	0	0	0	0	0	0	0	0	0	0	0	0	0	0	0	0	0	0	0	0	0
237069	Tenuibacillus multivorans	0	0	0	0	0	0	0	0	0	0	0	0	0	0	0	0	0	0	0	0	0	0	0	0	0	0	0	0	0	0	0	0	0	0	0	0	0	0	0	0	0	0	0	0	0	0	0	0
157733	Anaerobacillus macyae	0	0	0	0	0	0	0	0	0	0	0	0	0	0	0	0	0	0	0	0	0	0	0	0	0	0	0	0	0	0	0	0	0	0	0	0	0	0	0	0	0	0	0	0	0	0	0	0
200904	Paraliobacillus ryukyuensis	0	0	0	0	0	0	0	0	0	0	0	0	0	0	0	0	0	0	0	0	0	0	0	0	0	0	0	0	0	0	0	0	0	0	0	0	0	0	0	0	0	0	0	0	0	0	0	0
1406	Paenibacillus polymyxa	1e-05	0	0	0	0	0	0	0	0	0	0	0	0	0	0	0	0	0	0	0	0	0	0	0	0	2e-05	0	0	0.0002	0	0	0	0	0	0	1e-05	1e-05	0	1e-05	0	0	0	0	0	0	0	0	0
1737426	Paenibacillus senegalimassiliensis	0	0	0	0	0	0	0	0	0	0	0	0	0	0	0	0	0	0	1e-05	0	0	0	0	0	0	0	0	0	0	0	0	0	0	0	0	0	0	0	0	0	0	0	0	0	0	0	0	0
1502764	Paenibacillus sp. UNCCL117	0	0	0	0	0	0	0	0	0	0	0	0	0	0	0	0	0	0	0	0	0	0	0	0	0	0	0	0	0	0	0	0	0	0	0	0	0	0	1e-05	0	0	0	0	0	0	0	0	0
1920421	Paenibacillus sp. FSL H7-0331	0	0	0	0	0	0	0	0	0	0	0	0	0	0	0	0	0	0	0	0	0	0	0	0	0	0	0	0	0	0	0	0	0	0	0	0	0	0	0	0	0	0	0	0	0	0	0	0
414771	Paenibacillus donghaensis	0	0	0	0	0	0	1e-05	0	0	0	0	0	0	0	0	0	0	0	0	0	0	0	0	0	0	0	0	0	0	0	0	0	0	0	0	0	0	0	0	1e-05	0	0	0	0	0	0	0	0
483908	Paenibacillus sp. P22	1e-05	0	0	1e-05	1e-05	1e-05	1e-05	1e-05	0	1e-05	1e-05	0	0	0	0	0	0	0	0	0	1e-05	0	0	1e-05	0	0	0	0	0	0	0	0	0	0	0	1e-05	1e-05	0	0	0	0	0	0	0	0	0	0	0
1780103	Paenibacillus sp. DMB5	0	0	0	0	0	0	0	0	0	0	0	0	0	0	0	0	0	0	0	0	0	0	0	1e-05	0	0	0	0	0	0	0	0	0	0	0	0	1e-05	0	1e-05	0	0	0	0	0	0	0	0	0
1472719	Paenibacillus sp. P1XP2	0	0	0	0	0	0	0	0	0	0	0	0	0	0	0	0	0	0	0	0	0	0	0	0	0	0	0	0	0	0	0	0	0	0	0	0	0	0	0	0	0	0	0	0	0	0	0	0
867076	Paenibacillus sp. IHB B 3084	0	0	0	0	0	0	0	0	0	0	0	0	0	0	0	0	0	0.0001	0	0	0	0	0	0	0	0	3e-05	6e-05	0.00034	4e-05	0	9e-05	0.00031	0	0	0	0	0	0	0	0.00053	4e-05	0	0	0	0.00032	0	0
225906	Paenibacillus sanguinis	0	0	0	0	0	0	1e-05	0	0	0	0	0	0	0	0	0	0	0	0	0	0	0	0	0	0	0	0	0	0	0	0	0	0	0	0	0	1e-05	0	0	0	0	0	0	0	0	0	0	0
2059268	Paenibacillus sp. GM2FR	0	0	0	0	0	0	0	0	0	0	0	0	0	0	0	0	0	0	0	0	0	0	0	0	0	0	0	0	0	0	0	0	0	0	0	0	0	0	0	0	0	0	0	0	0	0	0	0
431596	Paenibacillus ginsengihumi	0	0	0	0	0	0	0	0	0	0	0	0	0	0	0	0	0	0	0	0	0	1e-05	0	0	0	0	0	0	0	0	0	0	0	0	0	0	0	0	0	1e-05	0	0	0	0	0	0	0	0
494026	Paenibacillus glacialis	0	0	0	0	0	0	0	0	0	0	0	0	0	0	0	0	0	0	0	0	0	0	0	0	0	0	0	0	0	0	0	0	0	0	0	0	0	0	0	0	0	0	0	0	0	0	0	0
554312	Paenibacillus rigui	0	0	0	1e-05	0	1e-05	1e-05	0	0	1e-05	2e-05	2e-05	0	0	0	0	0	0	0	0	0	0	0	1e-05	2e-05	0	0	0	0	0	0	0	0	0	0	1e-05	1e-05	0	0	0	0	0	0	0	0	0	0	0
1120679	Paenibacillus sp. LC231	0	0	0	0	0	0	0	0	0	0	0	0	0	0	0	0	0	0	0	0	0	0	0	0	0	0	0	0	0	0	0	0	0	0	0	0	0	0	0	0	0	0	0	0	0	0	0	0
1232431	Paenibacillus ihuae	0	0	0	0	0	0	0	0	1e-05	0	0	0	0	0	0	0	0	0	1e-05	0	0	1e-05	0	0	0	0	0	0	0	0	0	0	0	0	0	0	0	0	0	0	0	0	0	0	0	0	0	0
1243663	Paenibacillus camerounensis	0	0	0	0	0	0	0	0	0	0	0	0	0	0	0	0	0	0	0	0	0	0	0	0	0	0	0	0	0	0	0	0	0	0	0	0	0	0	0	0	0	0	0	0	0	0	0	0
1274374	Paenibacillus antibioticophila	0	0	0	0	0	0	0	0	0	0	0	0	0	0	0	0	0	0	0	0	0	0	0	0	0	0	0	0	0	0	0	0	0	0	0	0	1e-05	0	0	0	0	0	0	0	0	0	0	0
1449062	Paenibacillus sp. UNC217MF	0	0	0	0	0	0	0	0	0	0	0	0	0	0	0	0	0	0	0	0	0	0	0	0	0	0	0	0	0	0	0	0	0	0	0	0	0	0	0	0	0	0	0	0	0	0	0	0
1852522	Paenibacillus aquistagni	0	0	0	0	0	0	0	0	0	0	0	0	0	0	0	0	0	0	0	0	0	0	0	0	0	0	0	0	0	0	0	0	0	0	0	0	0	0	0	0	0	0	0	0	0	0	0	0
1907395	Paenibacillus sp. RU4X	0	0	0	0	0	0	0	0	0	0	0	0	0	0	0	0	0	0	0	0	0	0	0	0	0	0	0	0	0	0	0	0	0	0	0	0	0	0	0	0	0	0	1e-05	0	0	0	0	0
1926588	Paenibacillus sp. FSL R7-0337	0	0	0	0	0	0	0	0	0	0	0	0	0	0	0	0	0	0	0	0	0	0	0	0	0	0	0	0	0	0	0	0	0	0	0	0	0	0	0	0	0	0	0	0	0	0	0	0
483937	Paenibacillus riograndensis	0	0	0	0	0	1e-05	0	0	0	1e-05	1e-05	0	0	0	0	0	0	0	0	0	0	0	0	0	0	0	0	0	0	0	0	0	0	0	0	0	0	0	0	0	0	0	0	0	0	0	0	0
61624	Paenibacillus mucilaginosus	0	0	0	1e-05	0	0	1e-05	0	0	0	0	1e-05	0	0	0	2e-05	0	0	2e-05	0	1e-05	1e-05	0	1e-05	2e-05	0	0	0	0	0	0	0	0	1e-05	0	0	1e-05	1e-05	1e-05	2e-05	0	0	0	0	0	0	0	0
130049	Paenibacillus dendritiformis	0	0	0	0	0	0	0	0	0	0	0	0	0	0	0	0	0	0	0	0	0	0	0	0	0	0	0	0	0	0	0	0	0	0	0	0	0	0	0	0	0	0	0	0	0	0	0	0
59840	Paenibacillus curdlanolyticus	0	0	0	0	0	0	0	0	0	0	0	0	0	0	0	0	0	0	0	0	0	0	0	0	0	0	0	0	0	0	0	0	0	0	0	0	0	0	0	0	0	0	0	0	0	0	0	0
159743	Paenibacillus terrae	0	0	0	0	0	0	1e-05	0	1e-05	0	0	1e-05	0	0	0	0	0	0	1e-05	0	1e-05	1e-05	0	1e-05	1e-05	0	0	0	0	0	0	0	0	0	1e-05	0	0	0	1e-05	1e-05	0	0	0	0	0	0	0	0
44252	Paenibacillus macerans	0	0	0	0	0	0	0	0	0	0	0	0	0	0	0	0	0	0	0	0	0	0	0	0	0	0	0	0	0	0	0	0	0	0	0	0	0	0	0	1e-05	0	0	0	0	0	0	0	0
1619311	Paenibacillus physcomitrellae	0	0	0	0	0	0	1e-05	0	0	0	0	0	0	0	0	0	0	0	0	0	0	0	0	1e-05	0	0	0	0	0	0	0	0	0	0	1e-05	0	0	0	0	1e-05	0	0	0	0	0	0	0	0
1622070	Paenibacillus sp. GM2	0	0	0	0	0	0	0	0	0	0	0	0	0	0	0	0	0	0	0	0	0	0	0	0	0	0	0	0	0	0	0	0	0	0	0	0	0	0	0	0	0	0	0	0	0	0	0	0
1619309	Paenibacillus herberti	0	0	0	1e-05	0	0	0	0	0	0	0	0	0	0	0	0	0	0	0	0	0	0	0	0	0	0	0	0	0	0	0	0	0	0	0	0	0	0	0	0	0	0	0	0	0	0	0	0
1616788	Paenibacillus bovis	0	0	0	0	0	0	0	0	0	0	0	0	0	0	0	0	0	0	0	0	0	0	0	0	0	0	0	0	0	0	0	0	0	0	0	0	0	0	0	0	0	0	0	0	0	0	0	0
1567107	Paenibacillus wulumuqiensis	0	0	0	0	0	0	0	0	0	0	0	0	0	0	0	0	0	0	0	0	0	0	0	0	0	0	0	0	0	0	0	0	0	0	0	0	0	0	0	0	0	0	0	0	0	0	0	0
1566279	Paenibacillus sp. NFR01	0	0	0	0	0	0	0	0	0	0	0	0	0	0	0	0	0	0	0	0	0	0	0	0	0	0	0	0	0	0	0	0	0	0	0	0	1e-05	0	1e-05	0	0	0	0	0	0	0	0	0
1566278	Paenibacillus sp. 1_12	0	0	0	0	0	0	0	0	0	0	0	0	0	0	0	0	0	3e-05	0	0	0	0	0	0	0	0	0	0	0	0	0	0	0	0	0	0	0	0	0	0	0	0	1e-05	0	0	0	0	0
1536773	Paenibacillus sp. FSL R7-0331	0	0	0	0	0	0	0	0	0	0	0	0	0	0	0	0	0	0	0	0	0	0	0	0	0	0	0	0	0	0	0	0	0	0	0	0	1e-05	0	0	0	0	0	0	0	0	0	0	0
1536772	Paenibacillus sp. FSL R7-0273	0	0	0	0	0	0	0	0	0	0	0	1e-05	0	0	0	0	0	0	0	0	0	0	0	0	0	0	0	0	0	0	0	0	0	0	0	0	0	0	0	0	0	0	0	0	0	0	0	0
1502753	Paenibacillus sp. UNC496MF	0	0	0	1e-05	0	0	1e-05	0	0	0	0	0	0	0	0	0	0	0	0	0	0	0	0	0	0	0	0	0	0	0	0	0	0	0	0	0	1e-05	0	1e-05	1e-05	0	0	0	0	0	3e-05	0	2e-05
1499968	Paenibacillus sp. TCA20	0	0	0	0	0	0	0	0	0	0	0	0	0	0	0	0	0	0	0	0	0	0	0	0	0	0	0	0	0	0	0	0	0	0	0	0	0	0	0	0	0	0	0	0	0	0	0	0
1465766	Paenibacillus senegalensis	0	0	0	0	0	0	0	0	0	0	0	0	0	0	0	0	0	0	1e-05	0	0	1e-05	0	0	0	0	0	0	0	0	0	0	0	0	0	0	0	0	0	0	0	0	0	0	0	0	0	0
1462996	Paenibacillus yonginensis	0	0	0	1e-05	0	0	0	0	0	0	0	0	0	0	0	0	0	0	0	0	0	0	0	0	0	0	0	0	0	0	0	0	0	0	0	0	0	0	0	0	0	0	0	0	0	0	0	0
59842	Paenibacillus chondroitinus	0	0	0	1e-05	0	0	0	0	0	0	0	0	0	0	0	0	0	8e-05	1e-05	0	0	0	0	0	0	0	0	3e-05	0	0	0	0	0	0	0	0	1e-05	0	0	0	0	0	0	0	0	0	0.00037	0
1243662	Paenibacillus gorillae	0	0	0	0	0	0	0	0	0	0	0	0	0	0	0	0	0	0	0	0	0	0	0	0	0	0	0	0	0	0	0	0	0	0	0	0	0	0	1e-05	0	0	0	0	0	0	0	0	0
59893	Paenibacillus peoriae	0	0	0	0	0	0	0	0	0	0	0	0	0	0	0	0	0	0	1e-05	0	0	1e-05	0	0	0	0	0	0	0	0	0	0	0	0	0	0	0	0	0	0	0	0	0	0	0	0	0	0
1227352	Paenibacillus sp. FSL R7-277	0	0	0	0	0	0	0	0	0	0	0	0	0	0	0	0	0	0	0	0	0	0	0	0	0	0	0	0	0	0	0	0	0	0	0	0	0	0	0	0	0	0	0	0	0	0	0	0
1178515	Paenibacillus swuensis	0	0	0	0	0	0	0	0	0	0	0	0	0	0	0	0	0	0	0	0	0	0	0	0	0	0	0	0	0	0	0	0	0	0	0	0	0	0	0	0	0	0	0	0	0	0	0	0
1045775	Paenibacillus catalpae	0	0	0	0	0	0	0	0	0	0	0	0	0	0	0	0	0	0	0	0	0	0	0	0	0	0	0	0	0	0	0	0	0	0	0	0	1e-05	0	1e-05	0	0	0	0	0	0	0	0	0
1034769	Paenibacillus sp. HW567	0	0	0	0	0	0	0	0	0	0	0	0	0	0	0	0	0	0	0	0	0	0	0	1e-05	0	0	0	0	0	0	0	0	0	0	0	0	0	0	0	0	0	0	0	0	0	0	0	0
1886670	Paenibacillus sp. TI45-13ar	0	0	0	0	0	0	0	0	0	0	0	0	0	0	0	0	0	0	0	0	0	0	0	0	0	0	0	0	0	0	0	0	0	0	0	0	1e-05	0	1e-05	0	0	0	0	0	0	0	0	0
1401	Paenibacillus lautus	0	0	0	0	0	0	0	0	0	0	0	0	0	0	0	0	0	0	1e-05	0	0	0	0	0	0	0	0	0	0	0	0	0	0	0	0	0	0	0	0	0	0	0	0	0	0	0	0	0
1451	Paenibacillus amylolyticus	0	0	0	0	0	0	0	0	0	0	0	0	0	0	0	0	0	0	0	0	0	0	0	0	0	0	0	0	0	0	0	0	0	0	0	0	0	0	0	0	0	0	0	0	0	0	0	0
2026089	Paenibacillus sp. XY044	0	0	0	1e-05	0	0	1e-05	0	0	0	0	0	0	0	0	0	0	0	0	0	0	1e-05	0	0	0	0	0	0	0	0	0	0	0	0	0	0	1e-05	0	0	0	0	0	0	0	0	0	0	0
1977292	Paenibacillus xerothermodurans	0	0	0	0	0	0	0	0	0	0	0	0	0	0	0	0	0	0	0	0	0	0	0	0	0	0	0	0	0	0	0	0	0	0	0	0	0	0	0	0	0	0	0	0	0	0	0	0
1962644	Paenibacillus sp. VT-16-81	0	0	0	0	0	0	0	0	0	1e-05	0	0	4e-05	3e-05	2e-05	0	0	0	0	0	0	0	0	0	0	4e-05	0.0001	0	0	9e-05	5e-05	0	0	0	0	0	0	0	0	0	0	0.00013	6e-05	0	0.0002	0	3e-05	0.00012
1947023	Paenibacillus sp. UBA6285	0	0	0	0	0	0	0	0	0	0	0	0	0	0	0	0	0	0	0	0	0	0	0	0	0	0	0	0	0	0	0	0	0	0	0	0	0	0	0	0	0	0	0	0	0	0	0	0
1464	Paenibacillus larvae	0	0	0	0	0	0	0	0	0	0	0	0	0	0	0	2e-05	0	0	0	0	0	0	0	0	0	0	0	3e-05	0	0	0	0	0	0	0	1e-05	0	0	0	0	0	0	0	0	2e-05	0	0	0
1921144	Paenibacillus sp. FSL H7-0326	0	0	0	0	0	0	0	0	0	0	0	0	0	0	0	0	0	0	0	0	0	0	0	1e-05	0	0	0	0	0	0	0	0	0	0	0	0	0	0	0	0	0	0	0	0	0	0	0	0
1920425	Paenibacillus sp. FSL R5-0765	0	0	0	0	0	0	0	0	0	0	0	0	0	0	0	0	0	0	0	0	0	0	0	0	0	0	0	0	0	0	0	0	0	0	0	0	0	0	0	0	0	0	0	0	0	0	0	0
1920420	Paenibacillus sp. FSL A5-0031	0	0	0	0	0	0	0	0	0	0	0	0	0	0	0	0	0	0	0	0	0	0	0	0	0	0	0	0	0	0	0	0	0	0	0	0	0	0	0	0	0	0	0	0	0	0	0	0
44250	Paenibacillus alvei	0	0	0	0	0	0	0	0	0	0	0	0	0	0	0	0	0	0	0	0	0	1e-05	0	0	0	0	0	0	0	0	0	0	0	0	0	0	0	0	0	0	0	0	0	0	0	0	0	0
1469647	Paenibacillus ferrarius	0	0	0	0	0	0	0	0	0	0	0	0	0	0	0	0	0	0	0	0	0	0	0	0	0	0	0	0	0	0	0	0	0	0	0	0	0	0	0	0	0	0	0	0	0	0	0	0
1884379	Paenibacillus sp. OK076	0	0	0	0	0	0	0	0	0	0	0	0	0	0	0	0	0	0	0	0	0	0	0	0	0	0	0	0	0	0	0	0	0	0	0	0	0	0	0	0	0	0	0	0	0	0	0	0
1881033	Paenibacillus sp. CF095	0	0	0	0	0	0	0	0	0	0	0	0	0	0	0	0	0	0	0	0	0	0	0	0	0	0	0	0	0	0	0	0	0	0	0	0	0	0	0	0	0	0	0	0	0	0	0	0
1776378	Paenibacillus phocaensis	0	0	0	0	0	0	0	0	0	0	0	1e-05	0	0	0	0	0	0	2e-05	0	0	1e-05	0	0	1e-05	0	0	0	0	0	0	0	0	0	0	0	0	0	0	0	0	0	0	0	0	0	0	0
1763538	Paenibacillus crassostreae	0	0	0	0	0	0	0	0	0	0	0	0	0	0	0	0	0	0	0	0	0	0	0	0	0	0	0	0	0	0	0	0	0	0	0	0	0	0	0	0	0	0	0	0	0	0	0	0
1761874	Paenibacillus sp. 453mf	0	0	0	0	0	0	0	0	0	0	0	0	0	0	0	0	0	0	0	0	0	0	0	0	0	0	0	0	0	0	0	0	0	0	0	0	0	0	0	0	0	0	0	0	0	0	0	0
46240	Paenibacillus apiarius	0	0	0	1e-05	0	0	0	0	0	0	0	0	0	0	0	0	0	0	0	0	0	0	0	0	0	0	0	0	0	0	0	0	0	0	0	0	1e-05	0	0	0	0	0	0	0	0	0	0	0
1736404	Paenibacillus sp. Soil766	0	0	0	0	0	0	0	0	0	0	0	0	0	0	0	0	0	0	0	0	0	0	0	0	0	0	0	0	0	0	0	0	0	0	0	0	0	0	0	0	0	0	0	0	0	0	0	0
1736392	Paenibacillus sp. Soil724D2	0	0	0	0	0	0	0	0	0	0	0	0	0	0	0	0	0	0	0	0	0	0	0	0	0	0	0	0	0	0	0	0	0	0	0	0	0	0	0	0	0	0	1e-05	0	0	0	0	0
1729690	Paenibacillus sp. FJAT-26967	0	0	0	0	0	0	0	0	0	0	0	0	0	0	0	0	0	0	0	0	0	0	0	0	0	0	0	0	0	0	0	0	0	0	0	0	0	0	0	0	0	0	0	0	0	0	0	0
1720296	Paenibacillus rubinfantis	0	0	0	0	0	0	0	0	0	0	0	0	0	0	0	0	0	0	0	0	0	0	0	0	0	0	0	0	0	0	0	0	0	0	0	0	0	0	0	0	0	0	0	0	0	0	0	0
160799	Paenibacillus borealis	0	0	0	0	0	0	0	0	0	0	0	1e-05	0	0	0	0	0	0	1e-05	0	0	1e-05	0	1e-05	0	0	0	0	0	0	0	0	0	0	0	0	0	0	0	0	0	0	0	0	0	0	0	0
297318	Paenibacillus rhizosphaerae	0	0	0	0	0	0	0	0	1e-05	0	0	0	0	0	0	0	0	0	0	0	0	0	0	0	0	0	0	0	0	0	0	0	0	0	0	0	0	0	0	0	0	0	0	0	0	0	0	0
669461	Paenibacillus pini	0	0	0	0	0	0	0	0	0	0	0	0	0	0	0	0	0	0	0	0	0	0	0	0	0	0	0	0	0	0	0	0	0	0	0	0	0	0	0	0	0	0	0	0	0	0	0	0
302980	Paenibacillus sp. MY03	0	0	0	0	0	0	0	0	0	0	0	0	0	4e-05	7e-05	0	0.00011	0	0	0	0	0	0	0	0	0	0	0	5e-05	0	0	0	3e-05	0	0	0	0	0	0	1e-05	0	0	2e-05	0	0	3e-05	2e-05	2e-05
268407	Paenibacillus wynnii	0	0	0	0	0	0	0	0	0	0	0	0	0	0	0	0	0	0	0	0	0	0	0	0	0	0	0	0	0	0	0	0	0	0	0	0	0	0	0	0	0	0	0	0	0	0	0	0
253703	Paenibacillus antarcticus	0	0	0	0	0	0	0	0	0	0	0	0	0	0	0	0	0	0	0	0	0	0	0	0	0	0	0	0	0	0	0	0	0	0	0	0	0	0	0	0	0	0	0	0	0	0	0	0
324057	Paenibacillus sp. JDR-2	0	0	0	0	0	0	0	0	0	0	0	0	0	0	2e-05	0	0	0	0	0	0	0	0	0	0	0	0	0	0	0	0	0	0	0	0	0	0	0	0	0	0	0	0	0	0	0	0	0
512399	Paenibacillus pectinilyticus	0	0	0	0	0	0	0	0	0	0	0	0	0	0	0	0	0	0	0	0	0	0	0	0	0	0	0	0	0	0	0	0	0	0	0	0	0	0	0	0	0	0	0	0	0	0	0	0
343517	Paenibacillus barengoltzii	0	0	0	0	0	0	1e-05	0	0	0	0	1e-05	0	0	0	0	0	0	1e-05	0	0	0	0	0	0	0	0	0	0	0	2e-05	0	0	0	0	0	1e-05	0	1e-05	0	0	0	0	0	0	0	0	0
135193	Paenibacillus daejeonensis	0	0	0	0	0	0	0	0	0	0	0	0	0	0	0	0	0	0	0	0	0	0	0	0	0	0	0	0	0	0	0	0	0	0	0	0	0	0	0	0	0	0	0	0	0	0	0	0
217090	Paenibacillus pasadenensis	0	0	0	1e-05	1e-05	0	1e-05	0	0	0	0	0	0	0	0	0	0	0	0	0	0	1e-05	0	1e-05	0	0	0	0	0	0	0	0	0	0	0	0	1e-05	0	1e-05	1e-05	0	0	0	0	0	0	0	0
669462	Paenibacillus pinihumi	0	0	0	0	0	0	0	0	0	0	0	0	0	0	0	0	0	0	0	0	0	0	0	0	0	0	0	0	0	0	0	0	0	0	0	0	0	0	0	0	0	0	0	0	0	0	0	0
79263	Paenibacillus chitinolyticus	0	0	0	0	0	0	0	0	0	0	0	0	0	0	0	0	0	0	0	0	1e-05	0	0	0	0	0	0	0	0	0	0	0	0	0	0	0	0	0	0	0	0	0	0	0	0	0	0	0
79264	Paenibacillus ehimensis	0	0	0	0	0	0	0	0	0	0	0	0	0	0	0	0	0	0	0	0	0	0	0	0	0	0	0	0	0	0	0	0	0	0	0	0	0	0	0	0	0	0	0	0	0	0	0	0
687436	Paenibacillus ihumii	0	0	0	0	0	0	0	0	0	0	0	0	0	0	0	0	0	0	0	0	0	0	0	0	0	0	0	0	0	0	0	0	0	0	0	0	0	0	0	0	0	0	0	0	0	0	0	0
162209	Paenibacillus naphthalenovorans	0	0	0	0	0	0	0	0	0	0	0	0	0	0	0	0	0	0	1e-05	0	0	1e-05	0	1e-05	1e-05	0	0	0	0	0	0	0	0	0	0	0	0	0	0	0	0	0	0	0	0	0	0	0
948756	Paenibacillus macquariensis	0	0	0	0	0	0	0	0	0	0	0	0	0	0	0	0	0	0	0	0	0	0	0	0	0	0	0	0	0	0	0	0	0	0	0	0	0	0	0	0	0	0	0	0	0	0	0	0
365617	Paenibacillus sabinae	0	0	0	0	0	0	0	0	0	0	0	0	0	0	0	0	0	0	0	0	0	0	0	0	0	0	0	0	0	0	0	0	0	0	0	0	0	0	0	0	0	0	0	0	0	0	0	0
33942	Brevibacillus thermoruber	0	0	0	0	0	0	1e-05	0	0	0	0	1e-05	5e-05	0	0	0	0	0	0	0	0	1e-05	0	0	0	0	0	0	0	0	0	0	0	0	0	0	0	0	1e-05	1e-05	0	0	0	2e-05	0	0	0	5e-05
1118054	Brevibacillus massiliensis	0	0	0	0	0	0	0	0	0	0	0	0	0	0	0	0	0	0	0	0	0	0	0	0	0	0	0	0	0	0	0	0	0	0	0	0	0	0	0	0	0	0	0	0	0	0	0	0
1884381	Brevibacillus sp. OK042	0	0	0	0	0	0	0	0	0	0	0	0	0	0	0	0	0	0	0	0	0	0	0	0	0	0	0	0	0	0	0	0	0	0	0	0	0	0	0	0	0	0	0	0	0	0	0	0
1393	Brevibacillus brevis	0	0	0	0	0	0	0	0	0	0	0	0	0	0	0	0	0	0	0	0	0	0	0	0	0	0	0	0	0	0	0	0	0	0	0	1e-05	0	0	0	0	0	0	0	0	0	0	0	0
1465	Brevibacillus laterosporus	0	0	0	0	0	0	0	0	0	0	0	0	0	0	0	0	0	0	0	0	0	0	0	0	0	0	0	0	0	0	0	0	0	0	0	0	0	0	0	0	0	0	0	0	0	0	0	0
45462	Brevibacillus borstelensis	0	0	0	0	0	0	0	0	0	0	0	0	0	0	0	0	0	0	1e-05	0	0	1e-05	0	0	1e-05	0	0	0	0	0	0	0	0	0	0	0	0	0	0	1e-05	0	0	0	0	0	0	0	0
1978120	Saccharibacillus sp. O16	0	0	0	0	0	0	0	0	0	0	0	0	0	0	0	0	0	0	1e-05	0	0	1e-05	0	0	1e-05	0	0	0	0	0	0	0	0	0	0	0	0	0	1e-05	1e-05	0	0	0	0	0	0	0	0
459527	Saccharibacillus kuerlensis	0	0	0	0	0	0	0	0	0	0	0	0	0	0	0	0	0	0	0	0	0	0	0	0	0	0	0	0	0	0	0	0	0	0	0	0	0	0	0	0	0	0	0	0	0	0	0	0
456493	Saccharibacillus sacchari	0	0	0	0	0	0	0	0	0	0	0	0	0	0	0	0	0	0	0	0	0	0	0	0	0	0	0	0	0	0	0	0	0	0	0	0	0	0	0	0	0	0	0	0	0	0	0	0
2009338	Saccharibacillus sp. O23	0	0	0	0	0	0	0	0	0	0	0	0	0	0	0	0	0	0	0	0	0	1e-05	0	0	0	0	0	0	0	0	0	0	0	0	0	0	0	0	1e-05	1e-05	0	0	1e-05	0	0	0	0	0
278991	Aneurinibacillus terranovensis	0	0	0	0	0	0	0	0	0	0	0	0	0	0	0	0	0	0	0	0	0	0	0	0	0	0	0	0	0	0	0	0	0	0	0	0	0	0	0	0	0	0	0	0	0	0	0	0
1391	Aneurinibacillus aneurinilyticus	0	0	0	0	0	0	0	0	0	0	0	0	0	0	0	0	0	0	0	0	0	0	0	0	0	0	0	0	0	0	0	0	0	0	0	0	0	0	0	0	0	0	0	0	0	0	0	0
1500254	Aneurinibacillus soli	0	0	0	0	0	0	0	0	0	0	0	0	0	0	0	0	0	0	0	0	0	0	0	0	0	0	0	0	0	0	0	0	0	0	0	0	0	0	0	0	0	0	0	0	0	0	0	0
1955714	Cohnella sp. CIP 111063	0	0	0	0	0	0	0	0	0	0	0	0	0	0	0	0	0	0	0	0	0	0	0	0	0	0	0	0	0	0	0	0	0	0	0	0	0	0	1e-05	1e-05	0	0	0	0	0	0	0	0
329858	Cohnella thermotolerans	0	0	0	1e-05	0	0	1e-05	0	0	0	0	1e-05	0	0	0	0	0	0	0	0	0	0	0	0	0	0	0	0	0	0	0	0	0	0	0	0	1e-05	0	0	1e-05	0	0	0	0	0	0	0	0
1590652	Cohnella kolymensis	0	0	0	0	0	0	0	0	0	0	0	0	0	0	0	0	0	0	0	0	0	1e-05	0	0	0	0	0	0	0	0	0	0	0	0	0	0	0	0	0	0	0	0	0	0	0	0	0	0
1280390	Gorillibacterium massiliense	0	0	0	0	0	0	0	0	0	0	0	0	0	0	0	0	0	0	0	0	0	0	0	0	0	0	0	0	0	0	0	0	0	0	0	0	0	0	0	0	0	0	0	0	0	0	0	0
1689269	Gorillibacterium timonense	0	0	0	0	0	0	0	0	0	0	0	1e-05	0	0	0	0	0	0	1e-05	0	0	1e-05	0	0	1e-05	0	0	0	0	0	0	0	0	0	0	0	0	0	0	0	0	0	0	0	0	0	0	0
1950333	Bacillales bacterium UBA660	1e-05	1e-05	0	1e-05	1e-05	0	0	0	0	0	0	0	0	0	0	0	0	0	0	0	0	0	0	0	0	0	0	3e-05	0	0	0	0	0	0	1e-05	2e-05	1e-05	0	0	0	0	0	0	0	0	0	0	0
1950273	Bacillales bacterium UBA3946	0	0	0	1e-05	0	0	0	0	0	0	0	1e-05	0	0	0	0	0	0	0	0	0	0	0	0	0	0	0	0	0	0	0	0	0	0	0	1e-05	1e-05	0	0	0	0	0	0	0	0	0	0	0
1950268	Bacillales bacterium UBA3789	0	0	0	3e-05	0	0	0	0	0	0	0	0	2e-05	0.00065	0	0	0.00043	0.00442	0	0	0	0	0	1e-05	0	0.00013	0	0	0	0	0	0.006	0	0	5e-05	0.00034	3e-05	0	0	0	0	4e-05	0	0	0.01087	0.00099	2e-05	2e-05
1950249	Bacillales bacterium UBA2253	0	0	0	1e-05	0	0	0	0	0	0	0	1e-05	0	0	0	0	0	0	0	0	0	0	0	0	0	0	0	0	0	0	0	0	0	0	0	0	1e-05	0	0	0	0	0	0	0	0	0	0	0
1950304	Bacillales bacterium UBA5578	0	0	0	5e-05	0	0	0	0	0	0	0	0	0	0	0	0	0	0	0	0	0	0	0	0	0	0	0	0	0	0	0	0	0	0	0	8e-05	8e-05	0	0	0	0	0	0	0	0	0	0	0
1950316	Bacillales bacterium UBA6331	0	0	0	2e-05	0	0	0	0	0	0	0	0	0	0	0	0	0	0	0	0	0	0	0	0	0	0	0	0	0	0	0	0	0	0	0	6e-05	3e-05	0	0	0	0	0	0	0	0	0	0	0
1950344	Bacillales bacterium UBA7057	0	0	0	1e-05	0	0	0	0	0	0	0	0	0	0	0	0	0	0	0	0	0	0	0	0	0	0	0	0	0	0	0	0	0	0	1e-05	2e-05	1e-05	0	0	0	0	0	0	0	0	0	0	0
1950320	Bacillales bacterium UBA6356	0	0	0	0	0	0	0	0	0	0	0	0	0	0	0	0	0	0	0	0	0	0	0	0	0	0	0	0	0	0	0	0	0	0	0	0	0	0	0	0	0	0	0	0	0	0	0	0
1950288	Bacillales bacterium UBA4855	0	0	0	0	0	0	0	0	0	0	0	0	6e-05	0.0001	8e-05	9e-05	0.00041	0.0001	0	0	0	0	0	0	0	0.00011	0.00017	9e-05	5e-05	8e-05	0.00036	0.00013	3e-05	0	0	0	0	0	0	0	9e-05	0.00015	0.00011	9e-05	0.00037	0.00044	0.00014	0.00028
1950294	Bacillales bacterium UBA4951	0	0	0	0	0	0	0	0	0	0	0	0	0	0	0	0	0	0	0	0	0	0	0	0	0	0	0	0	0	0	0	0	0	0	0	0	0	0	0	0	0	0	0	0	0	0	0	0
1950329	Bacillales bacterium UBA6449	0	0	0	0	0	0	0	0	0	0	0	0	0	0	0	0	0	0	0	0	0	0	0	0	0	0	0	0	0	0	0	0	0	0	0	0	0	0	0	0	0	0	0	0	0	0	0	0
1950338	Bacillales bacterium UBA6879	0	0	0	0	0	0	0	0	0	0	0	0	0	0	0	0	0	0	0	0	0	0	0	0	0	0	0	0	0	0	0	0	0	0	0	1e-05	0	0	0	0	0	0	0	0	0	0	0	0
1950237	Bacillales bacterium UBA1231	0	0	0	0	0	0	0	0	0	0	1e-05	0	0	0	0	0	0	0	0	0	0	0	0	0	0	0	0	0	0	0	0	0	0	0	0	0	0	0	0	0	0	0	0	0	0	0	0	0
1950236	Bacillales bacterium UBA1188	0	0	0	0	0	0	0	0	0	0	0	0	0	0	0	0	0	0	0	0	0	0	0	0	0	0	0	0	0	0	0	0	0	0	0	0	0	0	0	0	0	0	0	0	0	0	0	0
1950345	Bacillales bacterium UBA7278	0	0	0	0	0	0	0	0	0	0	0	0	0	0	0	0	0	0	0	0	0	0	0	0	0	0	0	0	0	0	0	0	0	0	0	0	0	0	0	0	0	0	1e-05	0	0	0	0	0
1950350	Bacillales bacterium UBA754	0	0	0	0	0	0	0	0	0	0	0	0	0	0	0	0	0	0	0	0	0	0	0	0	0	0	0	0	0	0	0	0	0	0	0	0	0	0	0	0	0	0	0	0	0	0	0	0
1950282	Bacillales bacterium UBA4682	0	0	0	0	0	0	0	0	0	0	0	0	0	0	0	0	0	0	0	0	0	0	0	0	0	0	0	0	0	0	0	0	0	0	0	0	0	0	0	0	0	0	0	0	0	0	0	0
1950359	Bacillales bacterium UBA7752	0	0	0	0	0	0	0	0	0	0	0	0	0	0	0	0	0	0	0	0	0	0	0	0	0	0	0	0	0	0	0	0	0	0	0	0	0	0	0	0	0	0	0	0	0	0	0	0
1950254	Bacillales bacterium UBA2753	0	0	0	0	0	0	0	0	0	0	0	0	0	0	0	0	0	0	0	0	0	0	0	0	0	0	0	0	0	0	0	0	0	0	0	0	0	0	0	0	0	0	0	0	0	0	0	0
1950245	Bacillales bacterium UBA1709	0	0	0	0	0	0	0	0	0	0	0	0	0	0	2e-05	2e-05	0	0	0	0	0	0	0	0	0	0	2e-05	0	0	0	0	0	0	0	0	0	0	0	0	0	0	4e-05	0	0	2e-05	0	0	0
1950253	Bacillales bacterium UBA2730	0	0	0	1e-05	0	0	0	0	0	0	0	0	0	0	0	0	0	0	0	0	0	1e-05	0	0	0	0	0	0	0	0	0	0	0	0	0	6e-05	1e-05	0	0	0	0	0	0	0	0	0	0	0
1460634	Geomicrobium sp. JCM 19037	0	0	0	0	0	0	0	0	0	0	0	0	0	0	0	0	0	0	0	0	0	0	0	0	0	0	0	0	0	0	0	0	0	0	0	0	0	0	0	0	0	0	0	0	0	0	0	0
1460636	Geomicrobium sp. JCM 19039	0	0	0	0	0	0	0	0	0	0	0	0	0	0	0	0	0	0	1e-05	0	0	1e-05	0	0	1e-05	0	0	0	0	0	0	0	0	0	0	0	0	0	0	0	0	0	0	0	0	0	0	0
1390249	Desulfuribacillus stibiiarsenatis	0	0	0	0	0	0	0	0	0	0	0	0	0	0	0	0	0	0	0	0	0	0	0	0	0	0	0	0	0	0	0	0	0	0	0	1e-05	0	0	0	0	0	0	0	0	0	0	0	0
150056	Staphylococcus fleurettii	0	0	0	1e-05	0	0	0	0	0	0	0	1e-05	0	0	0	0	0	0	0	0	0	0	0	0	0	0	0	0	0	0	0	0	0	0	0	0	1e-05	0	0	0	0	0	0	0	0	0	0	0
70255	Staphylococcus condimenti	0	0	0	0	0	0	0	0	0	0	0	0	0.00017	0.00013	0.0002	2e-05	0.00025	0.0001	0	0	0	0	0	0	0	0.00016	0.0003	6e-05	0.00068	0.00015	0.00014	0.00013	0.00021	0	0	0	0	0	0	0	6e-05	0.00047	9e-05	0.00026	0.00021	0.0001	0.00025	0.00031
45972	Staphylococcus pasteuri	1e-05	0	0	0	0	0	0	0	0	0	0	0	0	0	0	0	0	0	0	0	0	0	0	0	0	0	0	0	0	0	0	0	0	0	0	1e-05	0	0	0	0	0	0	0	3e-05	0	0	0	0
1283	Staphylococcus haemolyticus	0	0	0	0	0	0	0	0	0	0	0	0	0	0	0	0	0	0	0	0	0	0	0	0	0	0	0	0	0	0	0	0	0	0	0	1e-05	0	0	0	0	0	0	0	0	0	0	0	0
569857	Staphylococcus microti	0	0	0	0	0	0	0	0	0	0	0	0	0	0	0	0	0	0	0	0	0	0	0	0	0	0	0	0	0	0	0	0	0	0	0	0	0	0	0	0	0	0	0	0	0	0	0	0
61015	Staphylococcus succinus	0	0	0	0	0	0	0	0	0	0	0	0	0	0	0	0	0	0	0	0	0	0	0	0	0	0	0	0	0	0	0	0	0	0	0	0	0	0	0	0	0	0	0	0	0	0	0	0
1262969	Staphylococcus sp. CAG:324	0	0	0	0	0	0	0	0	0	0	0	0	0	0	0	0	0	0	0	0	0	0	0	0	0	0	0	0	0	0	0	0	0	0	0	0	0	0	0	0	0	0	0	0	0	0	0	0
70258	Staphylococcus piscifermentans	0	0	0	0	0	0	0	0	0	0	0	0	0	0	0	0	0	0	0	0	0	0	0	0	0	0	0	0	0	0	0	0	0	0	0	0	0	0	0	0	0	0	0	0	0	0	0	0
42858	Staphylococcus lentus	0	0	0	0	0	0	0	0	0	0	0	0	0	0	0	0	0	0	0	0	0	0	0	0	0	0	0	0	0	0	0	0	0	0	0	0	0	0	0	0	0	0	0	0	0	0	0	0
29384	Staphylococcus kloosii	0	0	0	0	0	0	0	0	0	0	0	0	0	0	0	0	0	0	0	0	0	0	0	0	0	0	0	0	0	0	0	0	0	0	0	0	0	0	0	0	0	0	0	0	0	0	0	0
53344	Staphylococcus delphini	0	0	0	0	0	0	0	0	0	0	0	0	0	0	0	0	0	0	0	0	0	0	0	0	0	0	0	0	0	0	0	0	0	0	0	0	0	0	0	0	0	0	0	0	0	0	0	0
1986155	Staphylococcus cornubiensis	0	0	0	0	0	0	0	0	0	0	0	0	0	0	0	0	0	0	0	0	0	0	0	0	0	0	0	0	0	0	0	0	0	0	0	0	0	0	0	0	0	0	0	0	0	0	0	0
1667172	Staphylococcus sp. NAM3COL9	0	0	0	1e-05	0	0	0	0	0	0	0	0	0	0	0	0	0	0	0	0	0	0	0	0	0	0	0	0	0	0	0	0	0	0	0	0	1e-05	0	0	0	0	0	0	0	0	0	0	0
985762	Staphylococcus agnetis	0	0	0	0	0	0	0	0	0	0	0	0	0	0	0	0	0	0	0	0	0	0	0	0	0	0	0	0	0	0	0	0	0	0	0	0	0	0	0	0	0	0	0	0	0	0	0	0
985002	Staphylococcus argenteus	0	0	0	0	0	0	0	0	0	0	0	0	0	0	0	0	0	0	0	0	0	0	0	0	0	0	0	0	0	0	0	0	0	0	0	0	0	0	0	0	0	0	0	0	0	0	0	0
1280	Staphylococcus aureus	0	0	0	1e-05	0	0	0	0	0	0	0	0	0	0	0	0	0	0	0	0	0	0	0	0	0	0	0	0	0	0	0	0	0	0	0	0	1e-05	0	1e-05	0	0.00136	0	0	0	0	0	0	0
1288	Staphylococcus xylosus	0	0	0	0	0	0	0	0	0	0	0	0	0	0	0	0	0	0	0	0	0	0	0	0	0	0	0	0	0	0	0	0	0	0	0	0	0	0	0	0	0	0	0	0	0	0	0	0
1290	Staphylococcus hominis	0	0	0	0	0	0	0	0	0	0	0	0	0	0	0	0	0	0	0	0	0	0	0	0	0	0	0	0	0	0	0	0	0	0	0	0	0	0	0	0	0.00346	0	0	0	0	0	0	0.00242
1296	Staphylococcus sciuri	0	0	0	1e-05	0	0	0	0	0	0	0	0	0.00013	2e-05	0	0.0001	0.00018	3e-05	0	0	0	0	0	0	0	2e-05	3e-05	6e-05	7e-05	2e-05	9e-05	2e-05	0.00015	0	0	0	1e-05	0	0	0	0	5e-05	2e-05	5e-05	2e-05	0	8e-05	0
1286	Staphylococcus simulans	0	0	0	0	0	0	0	0	0	0	0	0	0	0	0	0	0	0	0	0	0	0	0	0	0	0	0	0	0	0	0	0	0	0	0	0	0	0	0	0	0	0	0	0	0	0	0	0
714307	Salinicoccus kekensis	0	0	0	0	0	0	0	0	0	0	0	0	0	0	0	0	0	0	0	0	0	0	0	0	0	0	0	0	0	0	0	0	0	0	0	0	0	0	0	0	0	0	0	0	0	0	0	0
367840	Salinicoccus luteus	0	0	0	0	0	0	0	0	0	0	0	0	0	0	0	0	0	0	0	0	0	0	0	0	0	0	0	0	0	0	0	0	0	0	0	0	0	0	0	0	0	0	0	0	0	0	0	0
558170	Salinicoccus carnicancri	0	0	0	0	0	0	0	0	0	0	0	0	0	0	0	0	0	0	0	0	0	0	0	0	0	0	0	0	0	0	0	0	0	0	0	0	0	0	0	0	0	0	0	0	0	0	0	0
1572701	Salinicoccus sp. YB14-2	0	0	0	0	0	0	0	0	0	0	0	0	0	0	0	0	0	0	0	0	0	0	0	0	0	0	0	0	0	0	0	0	0	0	0	0	0	0	0	0	0	0	0	0	0	0	0	0
69966	Macrococcus caseolyticus	0	0	0	0	0	0	0	0	0	0	0	0	0	0	0	0	0	0	0	0	0	0	0	1e-05	0	0	0	0	0	0	0	0	0	0	0	0	0	0	0	0	0	0	0	0	0	0	0	0
1898474	Macrococcus sp. IME1552	0	0	0	0	0	0	0	0	0	0	0	0	0	0	0	0	0	0	0	0	0	0	0	0	0	0	0	0	0	0	0	0	0	0	0	0	0	0	0	0	0	0	0	0	0	0	0	0
1461582	Jeotgalicoccus saudimassiliensis	0	0	0	0	0	0	0	0	0	0	0	0	0	0	0	0	0	0	0	0	0	0	0	0	0	0	0	0	0	0	0	0	0	0	0	0	0	0	0	0	0	0	0	0	0	0	0	0
930138	Aliicoccus persicus	0	0	0	0	0	0	0	0	0	0	0	0	0	0	0	0	0	0	0	0	0	0	0	0	0	0	0	0	0	0	0	0	0	0	0	0	0	0	0	0	0	0	0	0	0	0	0	0
1849491	Auricoccus indicus	0	0	0	0	0	0	0	0	0	0	0	0	0	0	0	0	0	0	0	0	0	0	0	0	0	0	0	0	0	0	0	0	0	0	0	0	0	0	1e-05	0	0	0	0	0	0	0	0	0
1476	Sporosarcina psychrophila	0	0	0	0	0	0	0	0	0	0	0	0	0	0	0	0	0	0	0	0	0	0	0	0	0	0	0	0	0	0	0	0	0	0	0	0	0	0	0	0	0	0	0	0	0	0	0	0
1571	Sporosarcina ureae	0	0	0	1e-05	0	0	0	0	0	0	0	0	0	0	0	0	0	0	0	0	0	0	0	0	0	0	0	0	0	0	0	0	0	0	0	0	1e-05	0	0	0	0	0	0	0	0	0	0	0
334735	Sporosarcina koreensis	0	0	0	0	0	0	0	0	0	0	0	0	0	0	0	0	0	0	2e-05	0	1e-05	1e-05	0	0	1e-05	0	0	0	0	0	0	0	0	0	0	0	0	0	0	0	0	0	0	0	0	0	0	0
33978	Caryophanon tenue	1e-05	0	0	0	0	0	0	0	0	0	0	0	0	0	0	0	0	0	0	0	0	0	0	0	0	0	0	0	0	0	0	0	0	0	0	0	0	0	0	0	0	0	0	0	0	0	0	0
2058136	Planococcus sp. MB-3u-03	0	0	0	0	0	0	0	0	0	0	0	0	0	3e-05	0	0	0	3e-05	0	0	0	1e-05	0	0	0	0	0	0	0	0	0	0	0	0	0	0	0	0	0	0	0	4e-05	0	0	0	0	0	0
1541197	Planococcus sp. CAU13	0	0	0	0	0	0	0	0	0	0	0	0	0	0	0	0	0	0	0	0	0	0	0	0	0	0	0	0	0	0	0	0	0	0	0	0	0	0	0	0	0	0	0	0	0	0	0	0
2213202	Planococcus sp. Y42	0	0	0	0	0	0	0	0	0	0	0	0	0	0	0	0	0	0	0	0	0	0	0	0	0	0	0	0	0	0	0	0	0	0	0	0	0	0	0	0	0	4e-05	0	0	0	0	0	0
1946679	Kurthia sp. UBA5785	0	0	0	0	0	0	0	0	0	0	0	0	0	0	0	0	0	0	0	0	0	0	0	0	0	0	0	0	0	0	0	0	0	0	0	0	1e-05	0	0	0	0	0	0	0	0	0	0	0
1033740	Kurthia senegalensis	0	0	0	0	0	0	0	0	0	0	0	0	0	0	0	0	0	0	0	0	0	0	0	0	0	0	0	0	0	0	0	0	0	0	0	0	0	0	0	0	0	0	0	0	0	0	0	0
263475	Viridibacillus arvi	0	0	0	0	0	0	0	0	0	0	0	0	0	0	0	0	0	0	0	0	0	0	0	0	0	0	0	0	0	0	0	0	0	0	0	0	0	0	0	0	0	0	0	0	0	0	0	0
1884360	Viridibacillus sp. OK051	0	0	0	0	0	0	0	0	0	0	0	0	0	0	0	0	0	0	0	0	0	0	0	0	0	0	0	0	0	0	0	0	0	0	0	0	0	0	0	0	0	0	0	0	0	0	0	0
220754	Jeotgalibacillus campisalis	0	0	0	0	0	0	0	0	0	0	0	0	0	0	0	0	0	0	0	0	0	0	0	0	0	0	0	0	0	0	0	0	0	0	0	0	0	0	0	0	0	0	0	0	0	0	0	0
[truncated: 18,636 more rows]
[truncated: 73 more columns]

## Sheet: RefSeq_Genomes_Used
TaxaID	TaxaID	MatchTaxID	TreeDistance	Assembly Accession	Size (Mb)	Release Date	Modify Date	Genes	Status
108	108	504472	1	GCA_000024525.1	8.49126	2010-01-13	2013-12-24	7132	Complete Genome
292	292	292	0	GCA_001718395.1	7.33738	2016-09-02	2022-10-09	6648	Complete Genome
518	518	518	0	GCA_012273255.1	5.09415	2020-04-12	2022-07-11	4790	Chromosome
545	545	545	0	GCA_014333315.1	4.56787	2020-08-29	2022-09-30	4275	Chromosome
550	550	550	0	GCA_025908355.1	4.96151	2022-10-30	2022-10-30	4800	Chromosome
554	554	554	0	GCA_025809395.1	5.00361	2022-10-24	2022-10-24	0	Complete Genome
562	562	562	0	GCA_018071945.2	5.01338	2021-04-19	2023-01-12	4790	Chromosome
573	573	573	0	GCA_027360235.1	5.79579	2022-12-27	2022-12-28	5822	Chromosome
623	623	623	0	GCA_013391345.1	4.82378	2020-06-22	2022-08-04	4934	Chromosome
632	632	632	0	GCA_000834905.1	4.83056	2015-02-09	2022-03-27	4412	Chromosome
654	654	654	0	GCA_016902875.1	4.6046	2021-02-17	2022-02-07	3973	Chromosome
680	680	680	0	GCA_001991055.1	5.63411	2017-02-10	2022-10-09	5127	Chromosome
729	729	729	0	GCA_004104465.2	2.06765	2019-01-24	2022-07-06	2060	Complete Genome
817	817	817	0	GCA_025916355.1	4.95065	2022-10-31	2022-11-02	4063	Chromosome
818	818	818	0	GCA_025916315.1	6.52171	2022-10-31	2022-11-02	5101	Chromosome
820	820	820	0	GCA_025914195.1	4.71635	2022-10-31	2022-11-01	3902	Chromosome
821	821	821	0	GCA_016766915.1	5.14101	2021-01-28	2022-08-10	4183	Chromosome
823	823	823	0	GCA_012273055.1	5.11278	2020-04-12	2022-10-06	4236	Chromosome
831	831	831	0	GCA_003175155.1	4.88129	2018-05-29	2022-04-01	4039	Chromosome
839	839	839	0	GCA_018389405.1	3.43934	2021-05-17	2022-10-07	2865	Complete Genome
853	853	853	0	GCA_025757765.1	2.85848	2022-10-19	2022-10-19	2771	Complete Genome
901	901	901	0	GCA_900116045.1	2.80753	2016-11-12	2021-12-15	2527	Complete Genome
907	907	907	0	GCA_003006415.1	2.56619	2018-03-17	2022-07-29	2422	Complete Genome
916	916	916	0	GCA_900116685.1	2.34443	2016-11-02	2022-07-31	2262	Scaffold
971	971	971	0	GCA_900111915.1	3.3001	2016-10-31	2022-07-31	3290	Scaffold
1176	1176	2692887	1	GCA_014696815.1	5.78675	2020-09-22	2022-03-23	5234	Contig
1258	1258	1258	0	GCA_016791605.1	2.32021	2021-02-01	2022-02-13	2366	Contig
1260	1260	1260	0	GCA_013267535.1	2.09006	2020-06-04	2022-07-13	2028	Complete Genome
1265	1265	1265	0	GCA_023664505.1	9.23049	2022-06-07	2022-06-07	9479	Scaffold
1280	1280	1280	0	GCA_026167705.1	2.75508	2022-11-14	2022-11-14	2738	Chromosome
1290	1290	1290	0	GCA_013364435.1	2.33804	2020-06-22	2022-07-20	2368	Chromosome
1304	1304	1304	0	GCA_001543085.1	2.19104	2016-02-01	2022-10-09	2087	Complete Genome
1308	1308	1308	0	GCA_019450155.1	1.80748	2021-08-05	2022-08-25	1885	Chromosome
1318	1318	1318	0	GCA_001578955.1	2.28706	2016-03-02	2022-03-17	2382	Scaffold
1322	1322	1322	0	GCA_027671065.1	2.96218	2023-01-11	2023-01-13	2935	Scaffold
1323	1323	1323	0	GCA_003435415.1	2.47851	2018-08-31	2022-09-03	2596	Scaffold
1343	1343	1343	0	GCA_900636445.1	1.9503	2018-12-19	2022-01-15	1937	Complete Genome
1356	1356	1140003	1	GCA_000407025.1	2.30646	2013-05-31	2022-05-10	2261	Scaffold
1358	1358	1358	0	GCA_004194355.1	2.4582	2019-02-14	2022-03-27	2403	Chromosome
1398	1398	1398	0	GCA_012851395.1	3.03783	2020-04-27	2022-02-07	3094	Chromosome
1423	1423	1423	0	GCA_025837035.1	4.06138	2022-10-25	2022-10-27	4206	Chromosome
1428	1428	1428	0	GCA_004194475.2	6.1571	2019-02-14	2022-07-06	6365	Chromosome
1490	1490	1490	0	GCA_008807835.1	3.77019	2019-10-03	2021-11-24	3690	Chromosome
1496	1496	1496	0	GCA_024628765.1	4.47637	2022-08-11	2022-09-30	4120	Chromosome
1502	1502	1502	0	GCA_002012325.1	3.8109	2017-03-03	2022-10-09	3672	Chromosome
1512	1512	1512	0	GCA_022845855.1	5.38627	2022-02-03	2022-02-03	4980	Complete Genome
1522	1522	1522	0	GCA_016697325.1	4.45215	2021-01-19	2022-01-28	4397	Chromosome
1531	1531	1531	0	GCA_012273195.1	5.53905	2020-04-12	2022-04-03	5461	Chromosome
1535	1535	1535	0	GCA_003459985.1	3.14023	2018-09-05	2018-09-05	2969	Scaffold
1540	1540	1540	0	GCA_024622925.1	2.94944	2022-08-10	2022-08-10	2938	Contig
1563	1563	768706	1	GCA_000235605.1	5.86308	2011-11-16	2022-05-01	5519	Complete Genome
1565	1565	696369	1	GCA_000189755.3	3.05279	2011-02-17	2022-05-01	3065	Scaffold
1579	1579	1579	0	GCA_025665255.1	2.03108	2022-10-12	2022-10-13	1939	Complete Genome
1584	1584	1584	0	GCA_022642945.1	2.00705	2022-03-21	2022-03-25	2120	Chromosome
1600	1600	1600	0	GCA_012848655.1	1.68395	2020-04-27	2022-03-09	1641	Complete Genome
1622	1622	1622	0	GCA_010586905.1	2.72295	2020-02-14	2022-02-12	2702	Complete Genome
1623	1623	1623	0	GCA_025150895.1	2.18789	2022-09-12	2022-09-15	2144	Complete Genome
1624	1624	1624	0	GCA_002736025.1	2.11761	2017-10-30	2021-10-05	2084	Chromosome
1660	1660	1660	0	GCA_005696695.1	2.36013	2019-05-23	2022-10-01	2055	Complete Genome
1680	1680	1680	0	GCA_023497865.1	2.49253	2022-05-18	2022-05-22	2126	Chromosome
1681	1681	1681	0	GCA_001281345.1	2.21037	2015-09-14	2022-07-07	1843	Complete Genome
1683	1683	1683	0	GCA_000966445.2	2.06464	2016-02-22	2022-09-25	1677	Complete Genome
1685	1685	1685	0	GCA_004319685.1	2.27463	2019-02-28	2022-03-29	1942	Chromosome
1686	1686	1686	0	GCA_902381755.1	2.07952	2019-08-09	2021-12-16	1759	Complete Genome
1689	1689	1689	0	GCA_017743215.1	2.55251	2021-04-04	2022-04-16	2101	Complete Genome
1693	1693	1693	0	GCA_000741645.1	1.89286	2014-08-18	2022-02-16	1597	Contig
1694	1694	1694	0	GCA_024138855.1	2.17257	2022-07-05	2022-07-07	1896	Complete Genome
1732	1732	1732	0	GCA_900104415.1	2.91229	2016-10-20	2022-03-31	2704	Scaffold
1735	1735	1735	0	GCA_027664255.1	2.66733	2023-01-11	2023-01-13	2713	Scaffold
1744	1744	1744	0	GCA_027557735.1	2.56631	2023-01-03	2023-01-04	2278	Complete Genome
1768	1768	1768	0	GCA_002085815.1	6.43406	2017-04-11	2022-10-09	5777	Chromosome
1886	1886	1886	0	GCA_019286195.1	7.05492	2021-07-20	2022-04-14	6136	Chromosome
2173	2173	2173	0	GCA_022846175.1	1.79116	2022-02-03	2022-04-11	1735	Complete Genome
2378	2378	2378	0	GCA_001373435.1	5.30528	2015-03-27	2022-09-01	5165	Scaffold
2751	2751	2751	0	GCA_009738125.1	4.06549	2019-12-10	2021-12-11	3927	Chromosome
13076	13076	13076	0	GCA_002847845.1	2.41125	2017-12-28	2022-08-17	2180	Scaffold
28025	28025	28025	0	GCA_023278655.1	2.02213	2022-05-09	2022-05-12	1676	Chromosome
28026	28026	28026	0	GCA_017743235.1	2.29294	2021-04-04	2022-04-16	1901	Complete Genome
28037	28037	28037	0	GCA_001560895.1	2.16792	2016-02-12	2022-09-25	2017	Complete Genome
28052	28052	28052	0	GCA_001406555.1	3.03522	2015-10-01	2022-03-31	2819	Scaffold
28090	28090	28090	0	GCA_013349205.1	3.76709	2020-06-17	2021-11-14	3680	Chromosome
28111	28111	28111	0	GCA_016894205.1	4.22838	2021-02-16	2022-10-07	3479	Chromosome
28116	28116	28116	0	GCA_016894185.1	6.42527	2021-02-16	2022-10-07	4884	Chromosome
28117	28117	28117	0	GCA_022009915.1	1.91	2022-02-05	2022-02-05	2085	Complete Genome
28118	28118	28118	0	GCA_900187175.1	4.39218	2017-08-15	2022-10-06	3709	Complete Genome
28123	28123	910312	1	GCA_000183605.2	2.19912	2010-11-30	2022-07-17	1730	Contig
28127	28127	28127	0	GCA_020735565.1	3.30841	2021-11-03	2021-11-05	2703	Complete Genome
28128	28128	28128	0	GCA_001546595.1	2.85951	2016-02-02	2022-10-06	2577	Scaffold
28139	28139	880526	1	GCA_000427365.1	2.88008	2013-07-15	2022-04-18	2301	Scaffold
28901	28901	28901	0	GCA_019264945.1	4.5752	2021-07-18	2022-08-05	4238	Chromosome
29332	29332	29332	0	GCA_001643245.1	4.04219	2016-05-13	2021-12-20	4284	Scaffold
29347	29347	29347	0	GCA_019597925.1	3.94184	2021-08-13	2022-09-02	3801	Complete Genome
29348	29348	29348	0	GCA_003439345.1	2.61718	2018-08-31	2022-09-03	2486	Scaffold
29349	29349	29349	0	GCA_002029295.1	2.02549	2017-03-15	2017-03-15	2103	Contig
29354	29354	29354	0	GCA_015152425.1	5.66398	2020-10-30	2020-10-30	5115	Contig
29360	29360	642492	1	GCA_000178835.2	4.71424	2011-03-22	2022-03-31	4373	Complete Genome
29361	29361	29361	0	GCA_020740285.1	5.47759	2021-11-03	2021-11-03	5346	Contig
29388	29388	29388	0	GCA_026430575.1	2.54904	2022-11-28	2022-11-30	2531	Complete Genome
29394	29394	29394	0	GCA_003263915.2	1.89042	2019-06-12	2022-04-14	1806	Chromosome
29466	29466	29466	0	GCA_002005185.1	2.17852	2017-02-21	2022-10-09	2005	Complete Genome
31971	31971	31971	0	GCA_003474925.1	2.19005	2018-09-06	2022-09-04	2287	Scaffold
31973	31973	31973	0	GCA_002148845.1	2.35892	2017-05-18	2017-05-18	2687	Contig
32040	32040	32040	0	GCA_900112675.1	5.07753	2016-10-31	2022-04-19	4582	Scaffold
33031	33031	33031	0	GCA_900454715.1	1.88356	2018-07-30	2022-01-05	1814	Contig
33034	33034	33034	0	GCA_900445285.1	2.00498	2018-08-07	2022-04-19	1897	Contig
33035	33035	33035	0	GCA_004210255.1	6.35484	2019-02-19	2022-09-28	5635	Complete Genome
33036	33036	33036	0	GCA_001546165.1	2.01554	2016-02-02	2021-12-13	1935	Scaffold
33038	33038	33038	0	GCA_016904015.1	3.19694	2021-02-17	2022-04-04	3072	Complete Genome
33039	33039	33039	0	GCA_023674525.1	2.83893	2022-06-08	2022-06-08	3126	Chromosome
33043	33043	33043	0	GCA_025149915.1	3.11292	2022-09-12	2022-09-15	2750	Complete Genome
33871	33871	700015	1	GCA_000195315.1	2.11568	2011-04-07	2022-04-18	1833	Complete Genome
33905	33905	33905	0	GCA_902385935.1	2.29164	2019-08-09	2021-12-16	1744	Complete Genome
34062	34062	34062	0	GCA_001553955.1	2.64914	2016-02-09	2022-10-09	2379	Complete Genome
34073	34073	34073	0	GCA_022009635.1	7.95378	2022-02-05	2022-02-07	7460	Chromosome
35517	35517	35517	0	GCA_015256235.1	1.46148	2020-11-06	2020-11-06	1328	Contig
35833	35833	35833	0	GCA_902374275.1	4.39119	2019-08-12	2022-10-02	3836	Scaffold
36834	36834	36834	0	GCA_021412605.1	3.63982	2022-01-10	2022-01-12	3373	Scaffold
36839	36839	36839	0	GCA_002006235.2	5.16792	2022-05-03	2022-06-11	4745	Complete Genome
38293	38293	38293	0	GCA_009665375.1	4.427	2019-11-18	2021-11-22	3952	Chromosome
38301	38301	38301	0	GCA_900478045.1	2.69597	2018-06-17	2022-02-22	2505	Complete Genome
39482	39482	39482	0	GCA_001404335.1	5.54549	2015-10-01	2022-03-31	5141	Scaffold
39483	39483	39483	0	GCA_015547135.1	2.23633	2020-11-17	2021-11-19	2308	Scaffold
39484	39484	1408437	1	GCA_000701665.1	2.6469	2014-06-11	2022-03-31	2741	Scaffold
39485	39485	39485	0	GCA_020735745.1	2.77278	2021-11-03	2021-11-05	2639	Complete Genome
39486	39486	39486	0	GCA_025150245.1	3.1883	2022-09-12	2022-09-15	3116	Complete Genome
39488	39488	39488	0	GCA_018140635.1	3.45568	2021-04-26	2022-09-28	3073	Chromosome
39490	39490	39490	0	GCA_027667005.1	3.89884	2023-01-11	2023-01-13	3572	Scaffold
39491	39491	39491	0	GCA_024167965.1	2.80463	2022-07-06	2022-07-06	2683	Chromosome
39492	39492	39492	0	GCA_902388055.1	2.94341	2019-08-09	2019-08-09	0	Chromosome
39496	39496	39496	0	GCA_025150745.1	2.85609	2022-09-12	2022-09-15	2626	Complete Genome
39497	39497	1336241	1	GCA_000518685.1	2.57925	2014-01-10	2022-03-31	2224	Scaffold
39498	39498	39498	0	GCA_900167215.1	2.554	2017-03-09	2017-03-09	2225	Scaffold
39777	39777	39777	0	GCA_002082765.1	2.07195	2017-04-10	2022-04-10	1890	Complete Genome
[truncated: 851 more rows]

## Sheet: Taxa_Names
	Name
[truncated: 20,635 more rows]

## Sheet: Baseline_Sample_Coverage
	Coverage	NumberMissing	MajorMissing	AllMissing	MaxMissing
[truncated: 22 more rows]

[truncated: 6 more sheets: Treatment_Sample_Coverage, EU_Average_Diet, Probiotic_Cell_Counts, Parameter_Sensitivity, Baseline_Sample_Sensitivity, Treatment_Sample_Sensitivity]
